# Supplementary material for: Insights into the cultured bacterial fraction of corals
Source: Research Square preprint supplement (doi:10.21203/rs.3.rs-105866/v1), 2020-11-21
Supplement: Supplementary file 1 [file 216819b84738df69571a6c6d.xlsx]

## Sheet: Sheet1
Unique Identifier	Accession numer	Reference	Isolation Source i.e. coral species	Depth	Colony/fragment health condition (options: healthy OR diseased; don't use both words in the same line, specify)	Temperature (add temperature of the SAMPLING SITE or AQUARIUM)	Sampling site (add geographic coordinates, name of the reef, or specify if colony is from aquaria)	Coral compartment used for isolation procedure (options: mucus, skeleton, tissue, whole fragment, if others, specify)	Incubation temperature (add temperature which plates were incubated for isolation procedure)	Link to paper, to be used only by the authors. Not for publication	Phylum	Class	Order	Family	Genus	Species	Similarity to closest sequence	Media cultured on	Date of sequnece	Full length sequence	Primers for sequnece	Link to paper, to be used only by the authors. Not for publication	Genome	Genome Accession No	no. of isolates with same sequence
Fun-101	DQ107399	Lampert et al, 2006	Fungia scutaria (mucus)		healthy	25	Gulf of Eilat, northern Red Sea	mucus	25		Actinobacteria	Actinobacteria	Micrococcales	Micrococcaceae	Kocuria	sp.	99	Marine agar	28-JUN-2005	GCGGCGTGCTTAACATGCAAGTCNAACGCTGAAGCTTGGTGCTTGCACTGGGTGGATGAGTGGCGAACGGGTGAGTAATACGTGAGTAACCTGCCCTTGACTCTGGGATAAGCCTGGGAAACTGGGTCTAATACTGGATATGACCTCCTGTCGCATGGTGGGGGGTGGAAAGGGTTTGTACTGGTTGTGGATGGGCTCACGGCCTATCAGCTTGTTGGTGGGGTAATGGCCTACCAAGGCGACGACGGGTAGCCGGCCTGAGAGGGTGACCGGCCACACTGGGACTGAGACACGGCCCAGACTCCTACGGGAGGCAGCAGTGGGGAATATTGCACAATGGGCGCAAGCCTGATGCAGCGACGCCGCGTGAGGGATGACGGCCTTCGGGTTGTAAACCTC…	8-27f 1492r
Fun-102	DQ107400	Lampert et al, 2006	Fungia scutaria (mucus)		healthy	25	Gulf of Eilat, northern Red Sea	mucus	25		Actinobacteria	Actinobacteria	Micrococcales	Micrococcaceae	Kocuria	sp.	99	Marine agar	28-JUN-2005	GCGGCGTGCNTAAACCTGCAAGTCCAACGCTGAAGCTTGGTGCTTGCACTGGGTGGATGAGTGGCGAACGGGTGAGTAATACGTGAGTAACCTGCCCTTGACTCTGGGATAAGCCTGGGAAACTGGGTCTAATACTGGATATGACCTCCTGTCGCATGGTGGGGGGTGGAAAGGGTTTGTACTGGTTGTGGATGGGCTCACGGCCTATCAGCTTGTTGGTGGGGTAATGGCCTACCAAGGCGACGACGGGTAGCCGGCCTGAGAGGGTGACCGGCCACACTGGGACTGAGACACGGCCCAGACTCCTACGGGAGGCAGCAGTGGGGAATATTGCACAATGGGCGCAAGCCTGATGCAGCGACGCCGCGTGAGGGATGACGGCCTTCGGGTTGTAAACCT…	8-27f 1492r
Fun-105	DQ107401	Lampert et al, 2006	Fungia scutaria (mucus)		healthy	25	Gulf of Eilat, northern Red Sea	mucus	25		Actinobacteria	Actinobacteria	Micrococcales	Dermatophilaceae	Dermatophilus	sp.	98	Marine agar	28-JUN-2005	AACGATGATGCCCAGCTTGCTGGGTGGATTAGTGGCGAACGGGTGAGTAACACGTGAGTAACCTGCCCTTCACTCTGGGATAAGCCTGGGAAACTGGGTCTAATACTGGATATTCTCATCATCTCGCATGGGGTGGTGTGGAAAGTTTTTCGGTGGAAGGATGGACTCGCGGCCTATCAGCTTGTTGGTGAGGTAGTGGCTCACCAAGGCGACGACGGGTAGCCGGCCTGAGAGGGTGATCGGCCACACTGGGACTGAGACACGGCCCANACTCCTACGGGGAGGCAGCAGTGGGGAATATTGCACAATGGGCGAAAGCCTGATGCAGCGACGCCNCGTGAGGGATGAAGGCCTTCGGGTTGTAAACCTCTTTCGCCAGGGAAGAAGCGAGAGTGACGG…	8-27f 1492r
Fun-109	DQ107402	Lampert et al, 2006	Fungia scutaria (mucus)		healthy	25	Gulf of Eilat, northern Red Sea	mucus	25		Actinobacteria	Actinobacteria	Micrococcales	Micrococcaceae	Micrococcus	sp.	99	Marine agar	28-JUN-2005	GCGGCGGCTTAAACATGCAAGTCGCAACGATGAAGCCCAGCTTGCTGGGTGGATTAGTGGCGAACGGGTGAGTAACACGTGAGTAACCTGCCCTTAACTCTGGGATAAGCCTGGGAAACTGGGTCTAATACCGGATAGGAGCGTCCACCGCATGGTGGGTGTTGGAAAGATTTATCGGTTTTGGATGGACTCGCGGCCTATCAGCTTGTTGGTGAGGTAATGGCTCACCAAGGCGACGACGGGTAGCCGGCCTGAGAGGGTGACCGGCCACACTGGGACTGAGACACGGCCCAGACTCCTACGGGAGGCAGCAGTGGGGAATATTGCACAATGGGCGCAAGCCTGATGCAGCGACGCCGCGTGAGGGATGACGGCCTTCGGGTTGTAAACCTCTTTCAG…	8-27f 1492r
Fun-121	DQ107403	Lampert et al, 2006	Fungia scutaria (mucus)		healthy	25	Gulf of Eilat, northern Red Sea	mucus	25		Actinobacteria	Actinobacteria	Micrococcales	Dermacoccaceae	Kytococcus	sp.	98	Marine agar	28-JUN-2005	CACATGCTAGTCGAAGGTGAAAGCGAGTGCTTGCACTCGTGGATCAGTGGCGAACGGGTGAGTAACACGTGAGTAACCTGCCCTCCACTCTGGGATAAGCGCTGGCAAACGGCGTCTAATACTGGATACGACCGACCCTCGCATGGGGTGTTGGTGGAAAGATTTATCGGTGGGGGATGGACTCGCGGCCTATCAGCTTGTTGGTGGGGTAATGGCCTACCAAGGCGACNACGGGTAGCCGGCCTGAGAGGGCGACCGGCCACACTGGGACTGAGACACGGCCCATACTCCTACGGGAGGCAGCAGTGGGGAATATTGCACAATGGGCGAAAGCCTGATGCAGCGACACCGCGTGAGGGATGACGGCCTTCGGGTTGTAAACCTCTTTCAGCAGGGAAG…	8-27f 1492r
Culture 10	DQ312233	N. Webster et al., 2006	Alcyonium antarcticum				McMurdo Sound, Ross Sea, Antarctica. Collection sites were McMurdo Station intake jetty (MM) (S77°51.02′, E166°39.56′), Scott Base (SB) (S77°51.05′, E166°45.54′) and Cape Armitage (CA) (S77°51.55′, E166°40.74′)	tissue (soft coral)	4		Actinobacteria	Actinobacteria	Micrococcales	Microbacteriaceae	Agrococcus	sp.	94	R2A Agar in seawater	01-DEC-2005	TGCTTCGGATTAGTGGCGAACGGGTGAGTAACACTGAGCATGTGCCCTGACTCTGGAATAAGCGCTGGAAACGCGTTAATACCGGATAAGGCATCTGAAAGAACTTCGGTCAAGGATCAGCTCAGGCCTATCAGTTAGTTGGTGAGGTAATGGCCACCAAGACGACGACGGGTAGCCGGCCTGAGAGGGTGACCGGCCACACTGGGACTGAGACACGGCCCAGACTCCTACGGGAGGCAGCAGTGGGGAATATTGCACAATGGGCGCAAGCCTGATGCAGCAACGCCGCGTGAGGGACGACGGCCTTCGGGTTGTAAACCTCTTTTAGCGGGAAGAAGCGAAAGTGACGGTACCGCAGAAAAAGCACCGGCTAACTACGTGCCAGCAGCCGCGGTAATA…	27f 1406r
AmSamW78	GU903263	Wilson et al., 2012	Acropora corals				Vatia Bay, on the north side of the island of Tutuila (140°14′S, 1700°40′W), American Samoa,	mucus			Actinobacteria	Actinobacteria	Micrococcales	Dermacoccaceae	Kytococcus	sp.	99	marine agar and Vibrio-specific thiosulphate citrate bile sucrose (TCBS) agar	19-FEB-2010	GCCTCGTGGATCAGTGGCGAACGGGTGAGTAACACGTGAGTAACCTGCCCTCCACTCTGGGATAAGCGCTGGAAACGGCGTCTAATACTGGATACGACCGACCCTCGCATGGGGTGTTGGTGGAAAGATTTATCGGTGGTGGATGGACTCGCGGCCTATCAGCTTGTTGGTGGGGTAATGGCCTACCAAGGCGACGACGGGTAGCCGGCCTGAGAGGGCGACCGGCCACACTGGGACTGAGACACGGCCCAGACTCCTACGGGAGGCAGCAGTGGGGAATATTGCACAATGGGCGAAAGCCTGATGCAGCGACGCCGCGTGAGGAATGACGGCCTTCGGGTTGTAAACCTCTTTCAGCAGGGAAGAAGCTTTTGTGACGGTACCTGCAGAAGAAGCACC…	63F 1389R
AmSamHH2	GU903193	Wilson et al., 2012	Acropora corals				Vatia Bay, on the north side of the island of Tutuila (140°14′S, 1700°40′W), American Samoa,	mucus			Actinobacteria	Actinobacteria	Micrococcales	Micrococcaceae	Micrococcus	sp.	100	marine agar and Vibrio-specific thiosulphate citrate bile sucrose (TCBS) agar	19-FEB-2010	GGTGGATTAGTGGCGAACGGGTGAGTAACACGTGAGTAACCTGCCCTTAACTCTGGGATAAGCCTGGGAAACTGGGTCTAATACCGGATAGGAGCGCCTACCGCATGGTGGGTGTTGGAAAGATTTATCGGTTTTGGATGGACTCGCGGCCTATCAGCTTGTTGGTGAGGTAATGGCTCACCAAGGCGACGACGGGTAGCCGGCCTGAGAGGGTGACCGGCCACACTGGGACTGAGACACGGCCCAGACTCCTACGGGAGGCAGCAGTGGGGAATATTGCACAATGGGCGCAAGCCTGATGCAGCGACGCCGCGTGAGGGATGACGGCCTTCGGGTTGTAAACCTCTTTCAGTAGGGAAGAAGCGAAAGTGACGGTACCTGCAGAAGAAGCACCGGCTA…	63F 1389R
AmSamHH3ii	GU903195	Wilson et al., 2012	Acropora corals				Vatia Bay, on the north side of the island of Tutuila (140°14′S, 1700°40′W), American Samoa,	mucus			Actinobacteria	Actinobacteria	Micrococcales	Micrococcaceae	Microbacterium	sp.	100	marine agar and Vibrio-specific thiosulphate citrate bile sucrose (TCBS) agar	19-FEB-2010	GAGCTTGCTCTTGTGGATCAGTGGCGAACGGGTGAGTAACACGTGAGCAACCTGCCCCTGACTCTGGGATAAGCGCTGGAAACGGCGTCTAATACTGGATATGTGACGTGACCGCATGGTCTGCGTTTGGAAAGATTTTTCGGTTGGGGATGGGCTCGCGGCCTATCAGCTTGTTGGTGAGGTAATGGCTCACCAAGGCGTCGACGGGTAGCCGGCCTGAGAGGGTGACCGGCCACACTGGGACTGAGACACGGCCCAGACTCCTACGGGAGGCAGCAGTGGGGAATATTGCACAATGGGCGAAAGCCTGATGCAGCAACGCCGCGTGAGGGATGACGGCCTTCGGGTTGTAAACCTCTTTTAGCAGGGAAGAAGCGAAAGTGACGGTACCTGCAGAAA…	63F 1389R
AmSamHH10ii	GU903203	Wilson et al., 2012	Acropora corals				Vatia Bay, on the north side of the island of Tutuila (140°14′S, 1700°40′W), American Samoa,	mucus			Actinobacteria	Actinobacteria	Micrococcales	Micrococcaceae	Microbacterium	sp.	100	marine agar and Vibrio-specific thiosulphate citrate bile sucrose (TCBS) agar	19-FEB-2010	CTTGCTCTTGTGGATCAGTGGCGAACGGGTGAGTAACACGTGAGCAACCTGCCCCTGACTCTGGGATAAGCGCTGGAAACGGCGTCTAATACTGGATATGTGACGTGACCGCATGGTCTGCGTTTGGAAAGATTTTTCGGTTGGGGATGGGCTCGCGGCCTATCAGCTTGTTGGTGAGGTAATGGCTCACCAAGGCGTCGACGGGTAGCCGGCCTGAGAGGGTGACCGGCCACACTGGGACTGAGACACGGCCCAGACTCCTACGGGAGGCAGCAGTGGGGAATATTGCACAATGGGCGAAAGCCTGATGCAGCAACGCCGCGTGAGGGATGACGGCCTTCGGGTTGTAAACCTCTTTTAGCAGGGAAGAAGCGAAAGTGACGGTACCTGCAGAAAAAG…	63F 1389R
AmSamHH54	GU903242	Wilson et al., 2012	Acropora corals				Vatia Bay, on the north side of the island of Tutuila (140°14′S, 1700°40′W), American Samoa,	mucus			Actinobacteria	Actinobacteria	Micrococcales	Dermacoccaceae	Kytococcus	sp.	100	marine agar and Vibrio-specific thiosulphate citrate bile sucrose (TCBS) agar	19-FEB-2010	GCCTCGTGGATCAGTGGCGAACGGGTGAGTAACACGTGAGTAACCTGCCCTCCACTCTGGGATAAGCGCTGGAAACGGCGTCTAATACTGGATACGACCGACCCTCGCATGGGGTGTTGGTGGAAAGATTTATCGGTGGTGGATGGACTCGCGGCCTATCAGCTTGTTGGTGGGGTAATGGCCTACCAAGGCGACGACGGGTAGCCGGCCTGAGAGGGCGACCGGCCACACTGGGACTGAGACACGGCCCAGACTCCTACGGGAGGCAGCAGTGGGGAATATTGCACAATGGGCGAAAGCCTGATGCAGCGACGCCGCGTGAGGGATGACGGCCTTCGGGTTGTAAACCTCTTTCAGCAGGGAAGAAGCTTTTGTGACGGTACCTGCAGAAGAAGCACC…	63F 1389R
AmSamHH66	GU903252	Wilson et al., 2012	Acropora corals				Vatia Bay, on the north side of the island of Tutuila (140°14′S, 1700°40′W), American Samoa,	mucus			Actinobacteria	Actinobacteria	Micrococcales	Micrococcaceae	Micrococcus	sp.	99	marine agar and Vibrio-specific thiosulphate citrate bile sucrose (TCBS) agar	19-FEB-2010	TGGATAGTGGCGAACGGGTGAGTAACACGTGAGTAACCTGCCCTTAACTCTGGGATAAGCCTGGGAAACTGGGTCTAATACCGGATAGGAGCGTCCACCGCATGGTGGGTGTTGGAAAGATTTATCGGTTTTGGATGGACTCGCGGCCTATCAGCTTGTTGGTGAGGTAATGGCTCACCAAGGCGACGACGGGTAGCCGGCCTGAGAGGGTGACCGGCCACACTGGGACTGAGACACGGCCCAGACTCCTACGGGAGGCAGCAGTGGGGAATATTGCACAATGGGCGAAAGCCTGATGCAGCGACGCCGCGTGAGGGATGACGGCCTTCGGGTTGTAAACCTCTTTCAGTAGGGAAGAAGCGAAAGTGACGGTACCTGCAGAAGAAGCACCGGCTAACT…	63F 1389R
AmSamHH74	GU903260	Wilson et al., 2012	Acropora corals				Vatia Bay, on the north side of the island of Tutuila (140°14′S, 1700°40′W), American Samoa,	mucus			Actinobacteria	Actinobacteria	Micrococcales	Dermacoccaceae	Kytococcus	sp.	99	marine agar and Vibrio-specific thiosulphate citrate bile sucrose (TCBS) agar	19-FEB-2010	ATCAGTGGCGAACGGGTGAGTAACACGTGAGTAACCTGCCCTCCACTCTGGGATAAGCGCTGGAAACGGCGTCTAATACTGGATACGACCGACCCTCGCATGGGGTGTTGGTGGAAAGATTTATCGGTGGTGGATGGACTCGCGGCCTATCAGCTTGTTGGTGGGGTAATGGCCTACCAAGGCGACGACGGGTAGCCGGCCTGAGAGGGCGACCGGCCACACTGGGACTGAGACACGGCCCAGACTCCTACGGGAGGCAGCAGTGGGGAATATTGCACAATGGGCGAAAGCCTGATGCAGCGACGCCGCGTGAGGAATGACGGCCTTCGGGTTGTAAACCTCTTTCAGCAGGGAAGAAGCTTTTGTGACGGTACCTGCAGAAGAAGCACCGGCTAACTA…	63F 1389R
AmSamHD26	GU903217	Wilson et al., 2012	Acropora corals				Vatia Bay, on the north side of the island of Tutuila (140°14′S, 1700°40′W), American Samoa,	mucus			Actinobacteria	Actinobacteria	Micrococcales	Micrococcaceae	Kocuria	sp.	100	marine agar and Vibrio-specific thiosulphate citrate bile sucrose (TCBS) agar	19-FEB-2010	CTGGGTGGATGAGTGGCGAACGGGTGAGTAATACGTGAGTAACCTGCCCTTGACTCTGGGATAAGCCTGGGAAACTGGGTCTAATACTGGATATGACATGTCACCGCATGGTGGTGTGTGGAAAGGGTTTTACTGGTTTTGGATGGGCTCACGGCCTATCAGCTTGTTGGTGGGGTAATGGCTCACCAAGGCGACGACGGGTAGCCGGCCTGAGAGGGTGACCGGCCACACTGGGACTGAGACACGGCCCAGACTCCTACGGGAGGCAGCAGTGGGGAATATTGCACAATGGGCGAAAGCCTGATGCAGCGACGCCGCGTGAGGGATGACGGCCTTCGGGTTGTAAACCTCTTTCAGCACGGAAGAAGCGAAAGTGACGGTACGTGCAGAAGAAGCGCC…	63F 1389R
AmSamDD19	GU903209	Wilson et al., 2012	Acropora corals		diseased		Vatia Bay, on the north side of the island of Tutuila (140°14′S, 1700°40′W), American Samoa,	mucus			Actinobacteria	Actinobacteria	Micrococcales	Dermabacteraceae	Brachybacterium	sp.	100	marine agar and Vibrio-specific thiosulphate citrate bile sucrose (TCBS) agar	19-FEB-2010	TGATTAGTGGCGAACGGGTGAGTAACACGTGAGTAACCTGCCCTCCACTTCGGGATAACCTCGGGAAATCGTGGCTAATACCGGATACGAGCACTCATCGCATGGTGAGTGCTGGAAAGATTTATCGGTGGGGGATGGACTCGCGGCCTATCAGTTTGTTGGTGAGGTGATGGCTCACCAAGACGATGACGGGTAGCCGGCCTGAGAGGGCGACCGGCCACACTGGGACTGAGACACGGCCCAGACTCCTACGGGAGGCAGCAGTGGGGAATATTGCACAATGGGCGAAAGCCTGATGCAGCGACGCCGCGTGGGGGATGACGGCCTTCGGGTTGTAAACCCCTTTCAGTAGGGAAGAAGCGAGAGTGACGGTACCTGCAGAAGAAGCGCCGGCTAACT…	63F 1389R
AmSamDD22ii	GU903212	Wilson et al., 2012	Acropora corals		diseased		Vatia Bay, on the north side of the island of Tutuila (140°14′S, 1700°40′W), American Samoa,	mucus			Actinobacteria	Actinobacteria	Micrococcales	Micrococcaceae	Nesterenkonia	sp.	99	marine agar and Vibrio-specific thiosulphate citrate bile sucrose (TCBS) agar	19-FEB-2010	GCTTGCCTCGGTGGATTAGTGGCGAACGGGTGAGTATCACGTGAGTAACCTGCCCTTGACTCTGGGATAAGCCCGGGAAACTGGGTCTAATACCGGATACGACCAGTCACCGCATGGTGTGCTGGTGGAAAGCTTTAGCGGTTTTGGATGGACTCGCGGCCTATCAGCTAGACGGTGAGGTAATGGCTCACCGTGGCGATGACGGGTAGCCGGCCTGAGAGGGTGACCGGCCACACTGGGACTGAGACACGGCCCAGACTCCTACGGGAGGCAGCAGTGGGGAATATTGCACAATGGGCGAAAGCCTGATGCAGCGACGCCGCGTGTGGGATGACGGCCTTCGGGTTGTAAACCACTTTCAGCAGGGAAGAAGCTTTTTGTGACGGTACCTGCAGAAGA…	63F 1389R
AmSamDD32	GU903221	Wilson et al., 2012	Acropora corals		diseased		Vatia Bay, on the north side of the island of Tutuila (140°14′S, 1700°40′W), American Samoa,	mucus			Actinobacteria	Actinobacteria	Micrococcales	Brevibacteriaceae	Brevibacterium	sp.	99	marine agar and Vibrio-specific thiosulphate citrate bile sucrose (TCBS) agar	19-FEB-2010	GCTTCTGGTGGATGAGTGGCGAACGGGTGAGTAACACGTGAGTAACCTGCCCCCGATTTCGGGATAAGCCCGGGAAACTGGGTCTAATACCGGATACGACCTGCCCTCGCATGAGGGTTGGTGGAAAGTTTTTCGATCGGGGATGGGCTCGCGGCCTATCAGCTTGTTGGTGGGGTAATGGCCTACCAAGGCGACGACGGGTAGCCGGCCTGAGAGGGCGACCGGCCACACTGGGACTGAGACACGGCCCAGACTCCTACGGGAGGCAGCAGTGGGGAATATTGCACAATGGGGGAAACCCTGATGCAGCGACGCAGCGTGCGGGATGACGGCCTTCGGGTTGTAAACCGCTTTCAGCAGGGAAGAAGCCGTAAGGTGACGGTACCTGCAGAAAAAGTA…	63F 1389R
AmSamDD47	GU903235	Wilson et al., 2012	Acropora corals		diseased		Vatia Bay, on the north side of the island of Tutuila (140°14′S, 1700°40′W), American Samoa,	mucus			Actinobacteria	Actinobacteria	Micrococcales	Micrococcaceae	Nesterenkonia	sp.	99	marine agar and Vibrio-specific thiosulphate citrate bile sucrose (TCBS) agar	19-FEB-2010	ATTAGTGGCGAACGGGTGAGTATCACGTGAGTAACCTGCCCTTGACTCTGGGATAAGCCCGGGAAACTGGGTCTAATACCGGATACGACCAGTCACCGCATGGTGTGCTGGTGGAAAGCTTTAGCGGTTTTGGATGGACTCGCGGCCTATCAGCTAGACGGTGAGGTAATGGCTCACCGTGGCGATGACGGGTAGCCGGCCTGAGAGGGTGACCGGCCACACTGGGACTGAGACACGGCCCAGACTCCTACGGGAGGCAGCAGTGGGGAATATTGCACAATGGGCGAAAGCCTGATGCAGCGACGCCGCGTGTGGGATGACGGCCTTCGGGTTGTAAACCACTTTCAGCAGGGAAGAAGCTTTTTGTGACGGTACCTGCAGAAGAAGCGCCGGCTAACT…	63F 1389R
AmSamDD49	GU903237	Wilson et al., 2012	Acropora corals		diseased		Vatia Bay, on the north side of the island of Tutuila (140°14′S, 1700°40′W), American Samoa,	mucus			Actinobacteria	Actinobacteria	Micrococcales	Brevibacteriaceae	Brevibacterium	sp.	100	marine agar and Vibrio-specific thiosulphate citrate bile sucrose (TCBS) agar	19-FEB-2010	GGTGGATGAGTGGCGAACGGGTGAGTAACACGTGAGTAACCTGCCCCTGATTTCGGGATAAGCCTGGGAAACTGGGTCTAATACCGGATACGACCATCCCTCGCATGAGGGTTGGTGGAAAGTTTTTCGATCGGGGATGGGCTCGCGGCCTATCAGCTTGTTGGTGGGGTAATGGCCTACCAAGGCGACGACGGGTAGCCGGCCTGAGAGGGCGACCGGCCACACTGGGACTGAGACACGGCCCAGACTCCTACGGGAGGCAGCAGTGGGGAATATTGCACAATGGGGGAAACCCTGATGCAGCGACGCAGCGTGCGGGATGACGGCCTTCGGGTTGTAAACCGCTTTCAGCAGGGAAGAAGCCGTAAGGTGACGGTACCTGCAGAAGAAGTACCGGCT…	63F 1389R
AmSamDD61	GU903248	Wilson et al., 2012	Acropora corals		diseased		Vatia Bay, on the north side of the island of Tutuila (140°14′S, 1700°40′W), American Samoa,	mucus			Actinobacteria	Actinobacteria	Micrococcales	Micrococcaceae	Nesterenkonia	sp.	99	marine agar and Vibrio-specific thiosulphate citrate bile sucrose (TCBS) agar	19-FEB-2010	TGCTTGCCGGGTTGGATTAGTGGCGAACGGGTGAGTATCACGTGAGTAACCTTCCCTTAACTCTGGGATAAGCCCGGGAAACTGGGTCTAATACCGGATACGACCAGTCCTCGCATGGGGTGCTGGTGGAAAGATTTATCGGTTTTGGATGGACTCGCGGCCTATCAGCTTGTTGGTGAGGTAATGGCTCACCAAGGCGATGACGGGTAGCCGGCCTGAGAGGGTGACCGGCCACACTGGGACTGAGACACGGCCCAGACTCCTACGGGAGGCAGCAGTGGGGAATATTGCACAATGGGCGAAAGCCTGATGCAGCGACGCCGCGTGCGGGATGACGGCCTTCGGGTTGTAAACCGCTTTCAGCAGGGAAGAAGCGAAAGTGACGGTACCTGCAGAAGA…	63F 1389R
AmSamDD69	GU903255	Wilson et al., 2012	Acropora corals		diseased		Vatia Bay, on the north side of the island of Tutuila (140°14′S, 1700°40′W), American Samoa,	mucus			Actinobacteria	Actinobacteria	Micrococcales	Dermabacteraceae	Brachybacterium	sp.	97	marine agar and Vibrio-specific thiosulphate citrate bile sucrose (TCBS) agar	19-FEB-2010	GGCGAACGGGTGAGTAACACGTGAGTAACCTGCCCTCCACTTCGGGATAACCTCGGGAAATCGTGGCTAATACCGGATACTAGCACTCATCGCATGGTGAGTGCTGGAAAGATTTATCGGTGGGGGATGGACTCGCGGCCTATCAGTTTGTTGGTGAGGTGATGGCTCACCAAGACGATGACGGGTAGCCGGCCTGAGAGGGCGACCGGCCACACTGGGACTGAGACACGGCCCACACTCCTACGGGAGGCACCAGTGGGGAATATTGCACAATGTCCGAAAGCCTGATGCATCGACCCCACGTGGGGGATGACGGCCTTCGGGTTGTAAACCCCTTTCAGTACGGAAGAAACGAAAGAGACGGTACCTGCATAAGAACCGCCGGCTAACTACGTGCCA…	63F 1389R
AmSamDD76	GU903262	Wilson et al., 2012	Acropora corals		diseased		Vatia Bay, on the north side of the island of Tutuila (140°14′S, 1700°40′W), American Samoa,	mucus			Actinobacteria	Actinobacteria	Micrococcales	Micrococcaceae	Nesterenkonia	sp.	100	marine agar and Vibrio-specific thiosulphate citrate bile sucrose (TCBS) agar	19-FEB-2010	CTTGCACGGTTGGATTAGTGGCGAACGGGTGAGTATCACGTGAGTAACCTTCCCTTAACTCTGGGATAAGCCCGGGAAACTGGGTCTAATACCGGATACGACCAGTCCTCGCATGGGGTGCTGGTGGAAAGATTTATCGGTTTTGGATGGACTCGCGGCCTATCAGCTTGTTGGTGAGGTAATGGCTCACCAAGGCGATGACGGGTAGCCGGCCTGAGAGGGTGACCGGCCACACTGGGACTGAGACACGGCCCAGACTCCTACGGGAGGCAGCAGTGGGGAATATTGCACAATGGGCGAAAGCCTGATGCAGCGACGCCGCGTGCGGGATGACGGCCTTCGGGTTGTAAACCGCTTTCAGCAGGGAAGAAGCGAAAGTGACGGTACCTGCAGAAGAAG…	63F 1389R
SCSAAB0018	JQ647882	Zhang et al., 2012	Antipathes dichotoma		healthy		Sanya coral reef conservation (18°11′N, 109°25′E) in the South China Sea	whole fragment			Actinobacteria	Actinobacteria	Micromonosporales	Micromonosporaceae	Micromonospora	sp.	99	Custom media, see reference for details	07-FEB-2012	CGGGGCGATGCCGCGTCTTACCATGCAGTCGAGCGGAAGGCCCTTCGGGGTACTCGAGCGGCGAACGGGTGAGTAACACGTGAGCAACCTGCCCCAGGCTTTGGGATAACCCCGGGAAACCGGGGCTAATACCGAATATGACCTCTGACCGCATGGTTGGTGGTGGAAAGTTTTTCGGCTTGGGATGGGCTCGCGGCCTATCAGCTTGTTGGTGGGGTGATGGCCTACCAAGGCGACGACGGGTAGCCGGCCTGAGAGGGCGACCGGCCACACTGGGACTGAGACACGGCCCAGACTCCTACGGGAGGCAGCAGTGGGGAATATTGCACAATGGGCGGAAGCCTGATGCAGCGACGCCGCGTGAGGGATGACGGCCTTCGGGTTGTAAACCTCTTTCAG…	27F 1525R
SCSAAB0019	JQ647883	Zhang et al., 2012	Antipathes dichotoma		healthy		Sanya coral reef conservation (18°11′N, 109°25′E) in the South China Sea	whole fragment			Actinobacteria	Actinobacteria	Micromonosporales	Micromonosporaceae	Micromonospora	sp.	100	Custom media, see reference for details	07-FEB-2012	GTGCAGTCGGGTCTACCATGCAGTCGAGCGGAAGGCCCTTCGGGGTACTCGAGCGGCGAACGGGTGAGTAACACGTGAGCAACCTGCCCCAAGCTTTGGGATAACCCTCGGAAACGGGGGCTAATACCGAATAGGACTGCTGGCCGCATGGCTGGTGGTGGAAAGTTTTTCGGCTTGGGATGGGCTCGCGGCCTATCAGCTTGTTGGTGGGGTGATGGCCTACCAAGGCGACGACGGGTAGCCGGCCTGAGAGGGCGACCGGCCACACTGGGACTGAGACACGGCCCAGACTCCTACGGGAGGCAGCAGTGGGGAATATTGCACAATGGGCGGAAGCCTGATGCAGCGACGCCGCGTGAGGGATGACGGCCTTCGGGTTGTAAACCTCTTTCAGCAGGG…	27F 1525R
SCSAAB0020	JQ647884	Zhang et al., 2012	Antipathes dichotoma		healthy		Sanya coral reef conservation (18°11′N, 109°25′E) in the South China Sea	whole fragment			Actinobacteria	Actinobacteria	Micromonosporales	Micromonosporaceae	Micromonospora	sp.	99	Custom media, see reference for details	07-FEB-2012	GGCCAGTCGGGTCTTACCATGCAGTCGAGCGGAAGGCCCTTCGGGGTACTCGAGCGGCGAACGGGTGAGTAACACGTGAGCAACCTGCCCCAGGCTTTGGGATAACCCCGGGAAACCGGGGCTAATACCGAATATGACCTCCGATCGCATGGTTGGTGGTGGAAAGTTTTTCGGCTTGGGATGGGCTCGCGGCCTATCAGCTTGTTGGTGGGGTGATGGCCTACCAAGGCGACGACGGGTAGCCGGCCTGAGAGGGCGACCGGCCACACTGGGACTGAGACACGGCCCAGACTCCTACGGGAGGCAGCAGTGGGGAATATTGCACAATGGGCGGAAGCCTGATGCAGCGACGCCGCGTGAGGGATGACGGCCTTCGGGTTGTAAACCTCTTTCAGCAGG…	27F 1525R
SCSAAB0023	JQ647887	Zhang et al., 2012	Antipathes dichotoma		healthy		Sanya coral reef conservation (18°11′N, 109°25′E) in the South China Sea	whole fragment			Actinobacteria	Actinobacteria	Pseudonocardiales	Pseudonocardiaceae	Saccharomonospora	sp.	99	Custom media, see reference for details	07-FEB-2012	GCGTTGTTTCCATCGCTCTACCATGCAGTCGACGCTGAGCTCAGCTTGCTGGGTGGATGAGTGGCGAACGGGTGAGTAACACGTGGGTAATCTGCCCTGTACTCTGGGATAAGCCTGGGAAACTGGGTCTAATACCGGATAGGACACATCACCGCATGGTGGTGTGTGGAAAGTTCCGGCGGTACAGGTTGAGCCCGCGGCCTATCAGCTTGTTGGTGGGGTGATGGCCTACCAAGGCGACGACGGGTAGCCGGCCTGAGAGGGTGACCGGCCACACTGGGACTGAGACACGGCCCAGACTCCTACGGGAGGCAGCAGTGGGGAATATTGCACAATGGGCGCAAGCCTGATGCAGCGACGCCGCGTGGGGGATGACGGCCTTCGGGTTGTAAACCCCTT…	27F 1525R
SCSAAB0028	JQ647889	Zhang et al., 2012	Antipathes dichotoma		healthy		Sanya coral reef conservation (18°11′N, 109°25′E) in the South China Sea	whole fragment			Actinobacteria	Actinobacteria	Streptomycetales	Streptomycetaceae	Streptomyces	sp.	99	Custom media, see reference for details	07-FEB-2012	AGTTTCTCTGAACCAGTGGGCTGCTACCATGCAGTCGACGATGAACCACTTCGGTGGGGATTAGTGGCGAACGGGTGAGTAACACGTGGGCAATCTGCCCTGCACTCTGGGACAAGCCCTGGAAACGGGGTCTAATACCGGATACTGACCCGCTTGGGCATCCAAGCGGTTCGAAAGCTCCGGCGGTGCAGGATGAGCCCGCGGCCTATCAGCTTGTTGGTGAGGTAATGGCTCACCAAGGCGACGACGGGTAGCCGGCCTGAGAGGGCGACCGGCCACACTGGGACTGAGACACGGCCCAGACTCCTACGGGAGGCAGCAGTGGGGAATATTGCACAATGGGCGAAAGCCTGATGCAGCGACGCCGCGTGAGGGATGACGGCCTTCGGGTTGTAAACC…	27F 1525R
SCSAAB0029	JQ647890	Zhang et al., 2012	Antipathes dichotoma		healthy		Sanya coral reef conservation (18°11′N, 109°25′E) in the South China Sea	whole fragment			Actinobacteria	Actinobacteria	Streptomycetales	Streptomycetaceae	Streptomyces	sp.	99	Custom media, see reference for details	07-FEB-2012	GGCATTGCGCAGCTTACCATGCAGTCGACGATGAAGCCGCTTCGGTGGTGGATTAGTGGCGAACGGGTGAGTAACACGTGGGCAATCTGCCCTGCACTCTGGGACAAGCCCTGGAAACGGGGTCTAATACCGGATATGACACGGGATCGCATGGTCTCCGTGTGGAAAGCTCCGGCGGTGCAGGATGAGCCCGCGGCCTATCAGCTTGTTGGTGGGGTGATGGCCTACCAAGGCGACGACGGGTAGCCGGCCTGAGAGGGCGACCGGCCACACTGGGACTGAGACACGGCCCAGACTCCTACGGGAGGCAGCAGTGGGGAATATTGCACAATGGGCGCAAGCCTGATGCAGCGACGCCGCGTGAGGGATGACGGCCTTCGGGTTGTAAACCTCTTTCAG…	27F 1525R
SCSAAB0030	JQ647891	Zhang et al., 2012	Antipathes dichotoma		healthy		Sanya coral reef conservation (18°11′N, 109°25′E) in the South China Sea	whole fragment			Actinobacteria	Actinobacteria	Streptomycetales	Streptomycetaceae	Streptomyces	sp.	99	Custom media, see reference for details	07-FEB-2012	TGGCGTGCGGGTGCTACCATGCAGTCGACGATGACCTCCTTCGGGAGGGGATTAGTGGCGAACGGGTGAGTAACACGTGGGCAATCTGCCCTGCACTCTGGGACAAGCCCTGGAAACGGGGTCTAATACCGGATACTGACCCGCTTGGGCATCCAAGCGGTTCGAAAGCTCCGGCGGTGCAGGATGAGCCCGCGGCCTATCAGCTTGTTGGTGAGGTAATGGCTCACCAAGGCGACGACGGGTAGCCGGCCTGAGAGGGCGACCGGCCACACTGGGACTGAGACACGGCCCAGACTCCTACGGGAGGCAGCAGTGGGGAATATTGCACAATGGGCGAAAGCCTGATGCAGCGACGCCGCGTGAGGGATGACGGCCTTCGGGTTGTAAACCTCTTTCAGC…	27F 1525R
SCSAAB0032	JQ647892	Zhang et al., 2012	Antipathes dichotoma		healthy		Sanya coral reef conservation (18°11′N, 109°25′E) in the South China Sea	whole fragment			Actinobacteria	Actinobacteria	Streptomycetales	Streptomycetaceae	Streptomyces	sp.	99	Custom media, see reference for details	07-FEB-2012	CGGGAGTGCGCTGCTACCATGCAGTCGACGATGAACCGCTTTCGGGCGGGGATTAGTGGCGAACGGGTGAGTAACACGTGGGCAATCTGCCCTGCACTCTGGGACAAGCCCTGGAAACGGGGTCTAATACCGGATATGACTGTCCGCCGCATGGTGGATGGTGTAAAGCTCCGGCGGTGCAGGATGAGCCCGCGGCCTATCAGCTTGTTGGTGAGGTAGTGGCTCACCAAGGCGACGACGGGTAGCCGGCCTGAGAGGGCGACCGGCCACACTGGGACTGAGACACGGCCCAGACTCCTACGGGAGGCAGCAGTGGGGAATATTGCACAATGGGCGAAAGCCTGATGCAGCGACGCCGCGTGAGGGATGACGGCCTTCGGGTTGTAAACCTCTTTCAGC…	27F 1525R
SCSAAB0035	JQ647893	Zhang et al., 2012	Antipathes dichotoma		healthy		Sanya coral reef conservation (18°11′N, 109°25′E) in the South China Sea	whole fragment			Actinobacteria	Actinobacteria	Streptomycetales	Streptomycetaceae	Streptomyces	sp.	100	Custom media, see reference for details	07-FEB-2012	CGCATCGGGTGCTACCATGCAGTCGACGATGAACCGGTTTCGGCCGGGGATTAGTGGCGAACGGGTGAGTAACACGTGGGCAATCTGCCCTGCACTCTGGGATAAGCCCGGGAAACTGGGTCTAATACCGGATACGACACATGAGCGCATGCTCGTGTGTGGAAAGTTCCGGCGGTGCAGGATGAGCCCGCGGCCTATCAGTTTGTTGGTGGGGTAGTGGCCTACCAAGACGACGACGGGTAGCCGGCCTGAGAGGGTGACCGGCCACACTGGGACTGAGACACGGCCCAGACTCCTACGGGAGGCAGCAGTGGGGAATATTGCACAATGGGCGAAAGCCTGATGCAGCGACGCCGCGTGAGGGATGACGGCCTTCGGGTTGTAAACCTCTTTCAGCAG…	27F 1525R
A5-19	JN627163	Sun et al., 2012	Scleronephthya sp				Zhao’an Bay (23u539N; 117u109E) in the East China Sea	whole fragment		https://journals.plos.org/plosone/article?id=10.1371/journal.pone.0042847	Actinobacteria	Actinobacteria	Micrococcales	Cellulomonadaceae	Cellulomonas	sp.	99	Custom media, see reference for details	29-AUG-2011	TCGACGGTGACCCTGGAGCTTGCTCCGGGTGATCAGTGGCGAACGGGTGAGTAACACGTGAGTAACCTGCCCCAGACTCTGGGATAACTCCGAGAAATCGGTGCTAATACCGGATACGAGACGCACGGGCATCTGTAGCGTCTGGAAAGAATTTCGGTCTGGGATGGACTCGCGGCCTATCAGTTAGTTGGTGAGGTAATGGCTCACCAAGACGACGACGGGTAGCCGGCCTGAGAGGGCGACCGGCCACACTGGGACTGAGACACGGCCCAGACTCCTACGGGAGGCAGCAGTGGGGAATATTGCACAATGGGCGCAAGCCTGATGCAGCGACGCCGCGTGGGGGATGAAGGCCTTCGGGTTGTAAACCCCTTTCAGCAGGGAAGAAGCGAAAGTGAC…	27F 1500R	https://journals.plos.org/plosone/article?id=10.1371/journal.pone.0042847
A1-8	JN627164	Sun et al., 2012	Scleronephthya sp				Zhao’an Bay (23u539N; 117u109E) in the East China Sea	whole fragment			Actinobacteria	Actinobacteria	Corynebacteriales	Dietziaceae	Dietzia	sp.	99	Custom media, see reference for details	29-AUG-2011	TGCAGTCGACGGTAAGGCCCCTTCGGGGGTACACGAGTGGCGAACGGGTGAGTAACACGTGGGTAATCTGCCCTGCACTTCGGGATAAGCCTGGGAAACTGGGTCTAATACCGGATATGAACTCCTGCCGCATGGTGGGGGTTGGAAAGTTTTTCGGTGCAGGATGAGCCCGCGGCCTATCAGCTTGTTGGTGGGGTAATGGCCTACCAAGGCGACGACGGGTAGCCGGCCTGAGAGGGTGATCGGCCACACTGGGACTGAGACACGGCCCAGACTCCTACGGGAGGCAGCAGTGGGGAATATTGCACAATGGGCGAAAGCCTGATGCAGCGACGCCGCGTGGGGGATGACGGTCTTCGGATTGTAAACCCCTTTCAGTAGGGACGAAGCGCAAGTGAC…	27F 1500R
A1-3	JN627165	Sun et al., 2012	Scleronephthya sp				Zhao’an Bay (23u539N; 117u109E) in the East China Sea	whole fragment			Actinobacteria	Actinobacteria	Corynebacteriales	Gordoniaceae	Gordonia	sp.	99	Custom media, see reference for details	29-AUG-2011	TGCAGTCGAACGGAAAGGCCCAGCTTGCTGGGTACTCGAGTGGCGAACGGGTGAGTAACACGTGGGTGATCTGCCCTGGACTCTGGGATAAGCCTGGGAAACTGGGTCTAATACCGGATATTCACTTTCTCTCGCATGGGGGTTGGTGGAAAGCTTTTGCGGTTCAGGATGGGCCCGCGGCCTATCAGCTTGTTGGTGGGGTAATGGCCTACCAAGGCGACGACGGGTAGCCGACCTGAGAGGGTGATCGGCCACACTGGGACTGAGACACGGCCCAGACTCCTACGGGAGGCAGCAGTGGGGAATATTGCACAATGGGCGCAAGCCTGATGCAGCGACGCCGCGTGAGGGATGACGGCCTTCGGGTTGTAAACCTCTTTCACCAGGGACGAAGCGTGA…	27F 1500R
A1-10	JN627166	Sun et al., 2012	Scleronephthya sp				Zhao’an Bay (23u539N; 117u109E) in the East China Sea	whole fragment			Actinobacteria	Actinobacteria	Corynebacteriales	Gordoniaceae	Gordonia	sp.	99	Custom media, see reference for details	29-AUG-2011	TGCAGTCGAACGGAAAGGCCCAGCTTGCTGGGTACTCGAGTGGCGAACGGGTGAGTAACACGTGGGTGATCTGCCCTGGACTCTGGGATAAGCCTGGGAAACTGGGTCTAATACCGGATATTCACTTTCTCTCGCATGGGGGTTGGTGGAAAGCTTTTGCGGTTCAGGATGGGCCCGCGGCCTATCAGCTTGTTGGTGGGGTAATGGCCTACCAAGGCGACGACGGGTAGCCGACCTGAGAGGGTGATCGGCCACACTGGGACTGAGACACGGCCCAGACTCCTACGGGAGGCAGCAGTGGGGAATATTGCACAATGGGCGCAAGCCTGATGCAGCGACGCCGCGTGAGGGATGACGGCCTTCGGGTTGTAAACCTCTTTCACCAGGGACGAAGCGTGA…	27F 1500R
A4-4	JN627167	Sun et al., 2012	Scleronephthya sp				Zhao’an Bay (23u539N; 117u109E) in the East China Sea	whole fragment			Actinobacteria	Actinobacteria	Corynebacteriales	Gordoniaceae	Gordonia	sp.	99	Custom media, see reference for details	29-AUG-2011	TGCAGTCGACGGAAAGGCCCAGCTTGCTGGGTACTCGAGTGGCGAACGGGTGAGTAACACGTGGGTGATCTGCCCTGGACTCTGGGATAAGCCTGGGAAACTGGGTCTAATACCGGATATTCACTTTCTCTCGCATGGGGGTTGGTGGAAAGCTTTTGCGGTTCAGGATGGGCCCGCGGCCTATCAGCTTGTTGGTGGGGTAATGGCCTACCAAGGCGACGACGGGTAGCCGACCTGAGAGGGTGATCGGCCACACTGGGACTGAGACACGGCCCAGACTCCTACGGGAGGCAGCAGTGGGGAATATTGCACAATGGGCGCAAGCCTGATGCAGCGACGCCGCGTGAGGGATGACGGCCTTCGGGTTGTAAACCTCTTTCACCAGGGACGAAGCGTGAG…	27F 1500R
A4-16	JN627168	Sun et al., 2012	Scleronephthya sp				Zhao’an Bay (23u539N; 117u109E) in the East China Sea	whole fragment			Actinobacteria	Actinobacteria	Corynebacteriales	Gordoniaceae	Gordonia	sp.	99	Custom media, see reference for details	29-AUG-2011	GCAGTCGACGGAAGGCCCAGCTTGCTGGGTACTCGAGTGGCGAACGGGTGAGTAACACGTGGGTGATCTGCCCTGGACTCTGGGATAAGCCTGGGAAACTGGGTCTAATACCGGATATTCACTTTCTCTCGCATGGGGGTTGGTGGAAAGCTTTTGCGGTTCAGGATGGGCCCGCGGCCTATCAGCTTGTTGGTGGGGTAATGGCCTACCAAGGCGACGACGGGTAGCCGACCTGAGAGGGTGATCGGCCACACTGGGACTGAGACACGGCCCAGACTCCTACGGGAGGCAGCAGTGGGGAATATTGCACAATGGGCGCAAGCCTGATGCAGCGACGCCGCGTGAGGGATGACGGCCTTCGGGTTGTAAACCTCTTTCACCAGGGACGAAGCGTGAGTG…	27F 1500R
A4-20	JN627169	Sun et al., 2012	Scleronephthya sp				Zhao’an Bay (23u539N; 117u109E) in the East China Sea	whole fragment			Actinobacteria	Actinobacteria	Corynebacteriales	Gordoniaceae	Gordonia	sp.	99	Custom media, see reference for details	29-AUG-2011	TCGACGGAAAGGCCCAGCTTGCTGGGTACTCGAGTGGCGAACGGGTGAGTAACACGTGGGTGATCTGCCCTGCACTCTGGGATAAGCCTGGGAAACTGGGTCTAATACCGGATATGACCAACTGTCGCATGGTGGTTGGTGGAAAGCTTTTGCGGTGTGGGATGGGCCCGCGGCCTATCAGCTTGTTGGTGGGGTAATGGCCTACCAAGGCGACGACGGGTAGCCGACCTGAGAGGGTGATCGGCCACACTGGGACTGAGACACGGCCCAGACTCCTACGGGAGGCAGCAGTGGGGAATATTGCACAATGGGCGCAAGCCTGATGCAGCGACGCCGCGTGAGGGATGACGGCCTTCGGGTTGTAAACCTCTTTCACCAGGGACGAAGCGTGAGTGACGG…	27F 1500R
A5-8	JN627170	Sun et al., 2012	Scleronephthya sp				Zhao’an Bay (23u539N; 117u109E) in the East China Sea	whole fragment			Actinobacteria	Actinobacteria	Corynebacteriales	Gordoniaceae	Gordonia	sp.	99	Custom media, see reference for details	29-AUG-2011	GCAGTCGACGGAAGGCCCAGCTTGCTGGGTGCTCGAGTGGCGAACGGGTGAGTAACACGTGGGTGATCTGCCCCTGACTTTGGGATAAGCCTGGGAAACTGGGTCTAATACCGGATATGACCTTACGTTGCATGACGTTTGGTGGAAAGCCTTGTGCGGTTGGGGATGGGCCCGCGGCCTATCAGCTTGTTGGTGGGGTAATGGCCTACCAAGGCGACGACGGGTAGCCGACCTGAGAGGGTGATCGGCCACACTGGGACTGAGACACGGCCCAGACTCCTACGGGAGGCAGCAGTGGGGAATATTGCACAATGGGCGCAAGCCTGATGCAGCGACGCCGCGTGAGGGATGACGGCCTTCGGGTTGTAAACCTCTTTCACCAGGGACGAAGCGCAAGTG…	27F 1500R
A5-9	JN627171	Sun et al., 2012	Scleronephthya sp				Zhao’an Bay (23u539N; 117u109E) in the East China Sea	whole fragment			Actinobacteria	Actinobacteria	Corynebacteriales	Gordoniaceae	Gordonia	sp.	99	Custom media, see reference for details	29-AUG-2011	CAGCTTGCTGGGTACTCGAGTGGCGAACGGGTGAGTAACACGTGGGTGATCTGCCCTGAACTTTGGGATAAGCCTGGGAAACTGGGTCTAATACCGGATATGACCTTGGAGTGCATGCTCTGGGGTGGAAAGCTTTTGCGGTTCAGGATGGGCCCCGGCCTATCAGCTTGTTGGTGGGGTAATGGCCTACCAAGGCGACGACGGGTAGCCGACCTGAGAGGGTGATCGGCCACACTGGGACTGAGACACGGCCCAGACTCCTACGGGAGGCAGCAGTGGGGAATATTGCACAATGGGCGCAAGCCTGATGCAGCGACGCCGCGTGAGGGATGACGGCCTTCGGGTTGTAAACCTCTTTCACCAGGGACGAAGCGCAAGTGACGGTACCTGGAGAAGAAG…	27F 1500R
A5-14	JN627172	Sun et al., 2012	Scleronephthya sp				Zhao’an Bay (23u539N; 117u109E) in the East China Sea	whole fragment			Actinobacteria	Actinobacteria	Corynebacteriales	Gordoniaceae	Gordonia	sp.	99	Custom media, see reference for details	29-AUG-2011	GACGGAAGGCCCAGCTTGCTGGGTGCTCGAGTGGCGAACGGGTGAGTAACACGTGGGTGATCTGCCCCTGACTTTGGGATAAGCCTGGGAAACTGGGTCTAATACCGGATATGACCAGTTGGTGCATGCCTTCTGGTGGAAAGCCTTGTGCGGTTGGGGATGGGCCCGCGGCCTATCAGCTTGTTGGTGGGGTAATGGCCTACCAAGGCGACGACGGGTAGCCGACCTGAGAGGGTGATCGGCCACACTGGGACTGAGACACGGCCCAGACTCCTACGGGAGGCAGCAGTGGGGAATATTGCACAATGGGCGCAAGCCTGATGCAGCGACGCCGCGTGAGGGATGACGGCCTTCGGGTTGTAAACCTCTTTCACCAGGGACGAAGCTTTTGTGACGGTA…	27F 1500R
A1-12	JN627173	Sun et al., 2012	Scleronephthya sp				Zhao’an Bay (23u539N; 117u109E) in the East China Sea	whole fragment			Actinobacteria	Actinobacteria	Corynebacteriales	Mycobacteriaceae	Mycobacterium	sp.	99	Custom media, see reference for details	29-AUG-2011	GCAGTCGAACGGAAGGCCCCTTCGGGGGTGCTCGAGTGGCGAACGGGTGAGTAACACGTGGGTGATCTGCCCTGCACTTTGGGATAAGCCTGGGAAACTGGGTCTAATACCGAATAGGACTCCGGACTGCATGGTCTGGGGTGGAAAGCTTTTGCGGTGTGGGATGGGCCCGCGGCCTATCAGCTTGTTGGTGGGGTGATGGCCTACCAAGGCGACGACGGGTAGCCGGCCTGAGAGGGTGTCCGGCCACACTGGGACTGAGATACGGCCCAGACTCCTACGGGAGGCAGCAGTGGGGAATATTGCACAATGGGCGCAAGCCTGATGCAGCGACGCCGCGTGAGGGATGACGGCCTTCGGGTTGTAAACCTCTTTCGCCAGGGACGAAGCGCAAGTGAC…	27F 1500R
A1-17	JN627174	Sun et al., 2012	Scleronephthya sp				Zhao’an Bay (23u539N; 117u109E) in the East China Sea	whole fragment			Actinobacteria	Actinobacteria	Corynebacteriales	Mycobacteriaceae	Mycobacterium	sp.	99	Custom media, see reference for details	29-AUG-2011	GGCCCCTTCGGGGGTACTCGAGTGGCGAACGGGTGAGTAACACGTGGGTGATCTGCCCTGCACTTTGGGATAAGCCTGGGAAACTGGGTCTAATACCGAATAGGACTCCGGACTGCATGGTCTGGGGTGGAAAGCTTTTGCGGTGTGGGATGGGCCCGCGGCCTATCAGCTTGTTGGTGGGGTGATGGCCTACCAAGGCGACGACGGGTAGCCGGCCTGAGAGGGTGTCCGGCCACACTGGGACTGAGATACGGCCCAGACTCCTACGGGAGGCAGCAGTGGGGAATATTGCACAATGGGCGCAAGCCTGATGCAGCGACGCCGCGTGAGGGATGACGGCCTTCGGGTTGTAAACCTCTTTCGCCAGGGACGAAGCGCAAGTGACGGTACCTGGAGAAG…	27F 1500R
A3-1	JN627175	Sun et al., 2012	Scleronephthya sp				Zhao’an Bay (23u539N; 117u109E) in the East China Sea	whole fragment			Actinobacteria	Actinobacteria	Corynebacteriales	Mycobacteriaceae	Mycobacterium	sp.	99	Custom media, see reference for details	29-AUG-2011	TGCAGTCGACGGAAAGGCCCCTTCGGGGGTGCTCGAGTGGCGAACGGGTGAGTAACACGTGGGTGATCTGCCCTGCACTTTGGGATAAGCCTGGGAAACTGGGTCTAATACCGAATAGGACTCCGGACTGCATGGTCTGGGGTGGAAAGCGTTTGCGGTGTGGGATGGGCCCGCGGCCTATCAGCTTGTTGGTGGGGTGATGGCCTACCAAGGCGACGACGGGTAGCCGGCCTGAGAGGGTGTCCGGCCACACTGGGACTGAGATACGGCCCAGACTCCTACGGGAGGCAGCAGTGGGGAATATTGCACAATGGGCGCAAGCCTGATGCAGCGACGCCGCGTGAGGGATGACGGCCTTCGGGTTGTAAACCTCTTTCGCCAGGGACGAAGCGCAAGTGA…	27F 1500R
A3-11	JN627176	Sun et al., 2012	Scleronephthya sp				Zhao’an Bay (23u539N; 117u109E) in the East China Sea	whole fragment			Actinobacteria	Actinobacteria	Corynebacteriales	Mycobacteriaceae	Mycobacterium	sp.	99	Custom media, see reference for details	29-AUG-2011	TGCAGTCGAACGGAAGGCCCCTTCGGGGGTGCTCGAGTGGCGAACGGGTGAGTAACACGTGGGTGATCTGCCCTGCACTTTGGGATAAGCCTGGGAAACTGGGTCTAATACCGAATAGGACTCCGGACTGCATGGTCTGGGGTGGAAAGCTTTTGCGGTGTGGGATGGGCCCGCGGCCTATCAGCTTGTTGGTGGGGTGATGGCCTACCAAGGCGACGACGGGTAGCCGGCCTGAGAGGGTGTCCGGCCACACTGGGACTGAGATACGGCCCAGACTCCTACGGGAGGCAGCAGTGGGGAATATTGCACAATGGGCGCAAGCCTGATGCAGCGACGCCGCGTGAGGGATGACGGCCTTCGGGTTGTAAACCTCTTTCGCCAGGGACGAAGCGCAAGTGA…	27F 1500R
A5-20	JN627177	Sun et al., 2012	Scleronephthya sp				Zhao’an Bay (23u539N; 117u109E) in the East China Sea	whole fragment			Actinobacteria	Actinobacteria	Corynebacteriales	Mycobacteriaceae	Mycobacterium	sp.	99	Custom media, see reference for details	29-AUG-2011	AAGGCCCTTTCGGGGGTACTCGAGTGGCGAACGGGTGAGTAACACGTGGGTGATCTGCCCTGCACTTTGGGATAAGCCTGGGAAACTGGGTCTAATACCGAATAGGACTCCGGACTGCATGGTCTGGGGTGGAAAGCTTTTGCGGTGTGGGATGGGCCCGCGGCCTATCAGCTTGTTGGTGGGGTGATGGCCTACCAAGGCGACGACGGGTAGCCGGCCTGAGAGGGTGTCCGGCCACACTGGGACTGAGATACGGCCCAGACTCCTACGGGAGGCAGCAGTGGGGAATATTGCACAATGGGCGCAAGCCTGATGCAGCGACGCCGCGTGAGGGATGACGGCCTTCGGGTTGTAAACCTCTTTCGCCAGGGACGAAGCGCAAGTGACGGTACCTGGAGA…	27F 1500R
A5-7	JN627178	Sun et al., 2012	Scleronephthya sp				Zhao’an Bay (23u539N; 117u109E) in the East China Sea	whole fragment			Actinobacteria	Actinobacteria	Corynebacteriales	Mycobacteriaceae	Mycobacterium	sp.	99	Custom media, see reference for details	29-AUG-2011	GGTACTCGAGTGGCGAACGGGTGAGTAACACGTGGGTGATCTGCCCTGCACTTTGGGATAAGCCTGGGAAACTGGGTCTAATACCGAATACACCCTGCTGGTCGCATGGCCTGGTGGGGGAAAGCTTTTGCGGTGTGGGATGGGCCCGCGGCCTATCAGCTTGTTGGTGGGGTGATGGCCTACCAAGGCGACGACGGGTAGCCGGCCTGAGAGGGTGACCGGCCACACTGGGACTGAGATACGGCCCAGACTCCTACGGGAGGCAGCAGTGGGGAATATTGCACAATGGGCGCAAGCCTGATGCAGCGACGCCGCGTGGGGGATGACGGCCTTCGGGTTGTAAACCCCTTTCGCCAGGGACGAAGAGAGATTGACGGTACCTGGAGAAGAAGGACCGGC…	27F 1500R
A2-19	JN627179	Sun et al., 2012	Scleronephthya sp				Zhao’an Bay (23u539N; 117u109E) in the East China Sea	whole fragment			Actinobacteria	Actinobacteria	Corynebacteriales	Nocardiaceae	Rhodococcus	sp.	99	Custom media, see reference for details	29-AUG-2011	TGCAGTCGAGCGGTAAGGCCCTTCGGGGTACACGAGCGGCGAACGGGTGAGTAACACGTGGGTGATCTGCCCTGCACTTCGGGATAAGCCTGGGAAACTGGGTCTAATACCGGATAGGACCTCTTGCCGCATGGTGGGGGGTGGAAAGGTTTACTGGTGCAGGATGGGCCCGCGGCCTATCAGCTTGTTGGTGGGGTAATGGCCTACCAAGGCGACGACGGGTAGCCGACCTGAGAGGGTGACCGGCCACACTGGGACTGAGACACGGCCCAGACTCCTACGGGAGGCAGCAGTGGGGAATATTGCACAATGGGCGAAAGCCTGATGCAGCGACGCCGCGTGAGGGATGACGGCCTTCGGGTTGTAAACCTCTTTCAGCGCCGACGAAGCGTAAGTGAC…	27F 1500R
A1-2	JN627180	Sun et al., 2012	Scleronephthya sp				Zhao’an Bay (23u539N; 117u109E) in the East China Sea	whole fragment			Actinobacteria	Actinobacteria	Propionibacteriales	Nocardioidaceae	Nocardioides	sp.	99	Custom media, see reference for details	29-AUG-2011	GCAGTCGAGCGGAAGGCCCTTCGGGGTACTCGAGCGGCGAACGGGTGAGTAACACGTGAGTAATCTGCCCCTGGCTTCGGGATAGCCACCGGAAACGGTGATTAATACCGGATATGACTACTTCCTGCATGGGATGGTAGTGGAAAGTTTTTCGGCCAGGGATGTGCTCGCGGCCTATCAGCTTGATGGTGAGGTAATGGCTCACCATGGCTTCGACGGGTAGCCGGCCTGAGAGGGTGACCGGTCACACTGGGACTGAGACACGGCCCAGACTCCTACGGGAGGCAGCAGTGGGGAATATTGGACAATGGGCGGAAGCCTGATCCAGCAACGCCGCGTGAGGGATGACGGCCTTCGGGTTGTAAACCTCTTTCGGTAGGGACGAAGCGCAAGTGACGG…	27F 1500R
A5-6	JN627181	Sun et al., 2012	Scleronephthya sp				Zhao’an Bay (23u539N; 117u109E) in the East China Sea	whole fragment			Actinobacteria	Actinobacteria	Propionibacteriales	Nocardioidaceae	Nocardioides	sp.	99	Custom media, see reference for details	29-AUG-2011	TGCAGTCGAGCGGAAGGCCCTTCGGGGTACTCGAGCGGCGAACGGGTGAGTAACACGTGAGTAATCTGCCCCTGGCTTCGGGATAGCCACCGGAAACGGTGATTAATACCGGATATGACTACTTCCTGCATGGGATGGTAGTGGAAAGTTTTTCGGCCAGGGATGTGCTCGCGGCCTATCAGCTTGATGGTGAGGTAATGGCTCACCATGGCTTCGACGGGTAGCCGGCCTGAGAGGGTGACCGGTCACACTGGGACTGAGACACGGCCCAGACTCCTACGGGAGGCAGCAGTGGGGAATATTGGACAATGGGCGGAAGCCTGATCCAGCAACGCCGCGTGAGGGATGACGGCCTTCGGGTTGTAAACCTCTTTCGGTAGGGACGAAGCGCAAGTGACG…	27F 1500R
A6-8	JN627182	Sun et al., 2012	Scleronephthya sp				Zhao’an Bay (23u539N; 117u109E) in the East China Sea	whole fragment			Actinobacteria	Actinobacteria	Propionibacteriales	Nocardioidaceae	Nocardioides	sp.	99	Custom media, see reference for details	29-AUG-2011	TCGAGCGGAAGGCCCTTCGGGGTACTCGAGCGGCGAACGGGTGAGTAACACGTGAGTAATCTGCCCCTGGCTTCGGGATAGCCACCGGAAACGGTGATTAATACCGGATATGACTACTTCCTGCATGGGATGGTAGTGGAAAGTTTTTCGGCCAGGGATGTGCTCGCGGCCTATCAGCTTGATGGTGAGGTAATGGCTCACCATGGCTTCGACGGGTAGCCGGCCTGAGAGGGTGACCGGTCACACTGGGACTGAGACACGGCCCAGACTCCTACGGGAGGCAGCAGTGGGGAATATTGGACAATGGGCGGAAGCCTGATCCAGCAACGCCGCGTGAGGGATGACGGCCTTCGGGTTGTAAACCTCTTTCGGTAGGGACGAAGCGCAAGTGACGGTACC…	27F 1500R
A4-1	JN627183	Sun et al., 2012	Scleronephthya sp				Zhao’an Bay (23u539N; 117u109E) in the East China Sea	whole fragment			Actinobacteria	Actinobacteria	Streptomycetales	Streptomycetaceae	Streptomyces	sp.	99	Custom media, see reference for details	29-AUG-2011	CCTCCTTCGGGAGGGGATTAGTGGCGAACGGGTGAGTAACACGTGGGCAATCTGCCCTGCACTCTGGGACAAGCCCTGGAAACGGGGTCTAATACCGGATACTGACCCGCTTGGGCATCCAAGCGGTTCGAAAGCTCCGGCGGTGCAGGATGAGCCCGCGGCCTATCAGCTTGTTGGTGAGGTAATGGCTCACCAAGGCGACGACGGGTAGCCGGCCTGAGAGGGCGACCGGCCACACTGGGACTGAGACACGGCCCAGACTCCTACGGGAGGCAGCAGTGGGGAATATTGCACAATGGGCGAAAGCCTGATGCAGCGACGCCGCGTGAGGGATGACGGCCTTCGGGTTGTAAACCTCTTTCAGCAGGGAAGAAGCGAAAGTGACGGTACCTGCAGAAG…	27F 1500R
A4-2	JN627184	Sun et al., 2012	Scleronephthya sp				Zhao’an Bay (23u539N; 117u109E) in the East China Sea	whole fragment			Actinobacteria	Actinobacteria	Streptomycetales	Streptomycetaceae	Streptomyces	sp.	100	Custom media, see reference for details	29-AUG-2011	GCAAGTCGAACGATGAACCTCCTTCGGGAGGGGATTAGTGGCGAACGGGTGAGTAACACGTGGGCAATCTGCCCTGCACTCTGGGACAAGCCCTGGAAACGGGGTCTAATACCGGATACTGACCCGCTTGGGCATCCAAGCGGTTCGAAAGCTCCGGCGGTGCAGGATGAGCCCGCGGCCTATCAGCTTGTTGGTGAGGTAATGGCTCACCAAGGCGACGACGGGTAGCCGGCCTGAGAGGGCGACCGGCCACACTGGGACTGAGACACGGCCCAGACTCCTACGGGAGGCAGCAGTGGGGAATATTGCACAATGGGCGAAAGCCTGATGCAGCGACGCCGCGTGAGGGATGACGGCCTTCGGGTTGTAAACCTCTTTCAGCAGGGAAGAAGCGAAAGT…	27F 1500R
A4-3	JN627185	Sun et al., 2012	Scleronephthya sp				Zhao’an Bay (23u539N; 117u109E) in the East China Sea	whole fragment			Actinobacteria	Actinobacteria	Streptomycetales	Streptomycetaceae	Streptomyces	sp.	99	Custom media, see reference for details	29-AUG-2011	AGTCGACGATGACCTCCTTCGGGAGGGGATTAGTGGCGAACGGGTGAGTAACACGTGGGCAATCTGCCCTGCACTCTGGGACAAGCCCTGGAAACGGGGTCTAATACCGGATACTGACCCGCTTGGGCATCCAAGCGGTTCGAAAGCTCCGGCGGTGCAGGATGAGCCCGCGGCCTATCAGCTTGTTGGTGAGGTAATGGCTCACCAAGGCGACGACGGGTAGCCGGCCTGAGAGGGCGACCGGCCACACTGGGACTGAGACACGGCCCAGACTCCTACGGGAGGCAGCAGTGGGGAATATTGCACAATGGGCGAAAGCCTGATGCAGCGACGCCGCGTGAGGGATGACGGCCTTCGGGTTGTAAACCTCTTTCAGCAGGGAAGAAGCGAAAGTGACGG…	27F 1500R
A6-1	JN627186	Sun et al., 2012	Scleronephthya sp				Zhao’an Bay (23u539N; 117u109E) in the East China Sea	whole fragment			Actinobacteria	Actinobacteria	Streptomycetales	Streptomycetaceae	Streptomyces	sp.	99	Custom media, see reference for details	29-AUG-2011	CTTACCATGCAAGTCGACGATGAACCTCCTTCGGGAGGGGATTAGTGGCGAACGGGTGAGTAACACGTGGGCAATCTGCCCTGCACTCTGGGACAAGCCCTGGAAACGGGGTCTAATACCGGATACTGACCCGCTTGGGCATCCAAGCGGTTCGAAAGCTCCGGCGGTGCAGGATGAGCCCGCGGCCTATCAGCTTGTTGGTGAGGTAATGGCTCACCAAGGCGACGACGGGTAGCCGGCCTGAGAGGGCGACCGGCCACACTGGGACTGAGACACGGCCCAGACTCCTACGGGAGGCAGCAGTGGGGATATTGCACAATGGGCGAAAGCCTGATGCAGCGACGCCGCGTGAGGGATGACGGCCTTCGGGTTGTAAACCTCTTTCAGCAGGGAAGAAGC…	27F 1500R
A1-11	JN627187	Sun et al., 2012	Scleronephthya sp				Zhao’an Bay (23u539N; 117u109E) in the East China Sea	whole fragment			Actinobacteria	Actinobacteria	Micromonosporales	Micromonosporaceae	Micromonospora	sp.	99	Custom media, see reference for details	29-AUG-2011	TGCAGTCGAGCGGAAGGCCCTTCGGGGTACTCGAGCGGCGAACGGGTGAGTAACACGTGAGCAACCTGCCCCAGGCTTTGGGATAACCCCGGGAAACCGGGGCTAATACCGGATATTACATGCTGCCGCATGGTGGTGTGTGGAAAGTTTTTCGGCTTGGGATGGGCTCGCGGCCTATCAGCTTGTTGGTGGGGTGATGGCCTACCAAGGCGACGACGGGTAGCCGGCCTGAGAGGGCGACCGGCCACACTGGGACTGAGACACGGCCCAGACTCCTACGGGAGGCAGCAGTGGGGAATATTGCACAATGGGCGGAAGCCTGATGCAGCGACGCCGCGTGAGGGATGACGGCCTTCGGGTTGTAAACCTCTTTCAGCAGGGACGAAGCGTAAGTGACGG…	27F 1500R
A1-15	JN627188	Sun et al., 2012	Scleronephthya sp				Zhao’an Bay (23u539N; 117u109E) in the East China Sea	whole fragment			Actinobacteria	Actinobacteria	Micromonosporales	Micromonosporaceae	Micromonospora	sp.	99	Custom media, see reference for details	29-AUG-2011	GCGGAAGGCCCTTCGGGGTACTCGAGCGGCGAACGGGTGAGTAACACGTGAGTAACCTGCCCTAGGCTTTGGGATAACCCTCGGAAACGGGGGCTAATACCGGATATGACCTCCTGTCGCATGGTGGGGGGTGGAAAGTTTTTCGGCCTGGGATGGGCTCGCGGCCTATCAGCTTGTTGGTGGGGTGATGGCCTACCAAGGCGACGACGGGTAGCCGGCCTGAGAGGGCGACCGGCCACACTGGGACTGAGACACGGCCCAGACTCCTACGGGAGGCAGCAGTGGGGAATATTGCACAATGGGCGGAAGCCTGATGCAGCGACGCCGCGTGAGGGATGACGGCCTTCGGGTTGTAAACCTCTTTCAGCAGGGACGAAGCGCAAGTGACGGTACCTGCAG…	27F 1500R
A5-2	JN627189	Sun et al., 2012	Scleronephthya sp				Zhao’an Bay (23u539N; 117u109E) in the East China Sea	whole fragment			Actinobacteria	Actinobacteria	Micromonosporales	Micromonosporaceae	Micromonospora	sp.	99	Custom media, see reference for details	29-AUG-2011	CGGAAGGCCCTTCGGGGTACTCGAGCGGCGAACGGGTGAGTAACACGTGAGCAACCTGCCCTAGGCTTTGGGATAACCCCGGGAAACCGGGGCTAATACCGAATAGGACCTCTGACCGCATGGTTGGTGGTGGAAAGTTTTTCGGCCTGGGATGGGCTCGCGGCCTATCAGCTTGTTGGTGGGGTGATGGCCTACCAAGGCGACGACGGGTAGCCGGCCTGAGAGGGCGACCGGCCACACTGGGACTGAGACACGGCCCAGACTCCTACGGGAGGCAGCAGTGGGGAATATTGCACAATGGGCGGAAGCCTGATGCAGCGACGCCGCGTGAGGGATGACGGCCTTCGGGTTGTAAACCTCTTTCAGCAGGGACGAAGCGTAAGTGACGGTACCTGCAGA…	27F 1500R
A5-13	JN627190	Sun et al., 2012	Scleronephthya sp				Zhao’an Bay (23u539N; 117u109E) in the East China Sea	whole fragment			Actinobacteria	Actinobacteria	Micromonosporales	Micromonosporaceae	Micromonospora	sp.	100	Custom media, see reference for details	29-AUG-2011	CAGTCGAGCGGAAGGCCCTTCGGGGTACTCGAGCGGCGAACGGGTGAGTAACACGTGAGTAACCTGCCCTAGGCTTTGGGATAACCCTCGGAAACGGGGGCTAATACCGGATATGACCTTGCCCTGCATGGGGTTTGGTGGAAAGTTTTTCGGCCTGGGATGGGCTCGCGGCCTATCAGCTTGTTGGTGGGGTGATGGCCTACCAAGGCGACGACGGGTAGCCGGCCTGAGAGGGCGACCGGCCACACTGGGACTGAGACACGGCCCAGACTCCTACGGGAGGCAGCAGTGGGGAATATTGCACAATGGGCGGAAGCCTGATGCAGCGACGCCGCGTGAGGGATGACGGCCTTCGGGTTGTAAACCTCTTTCAGCAGGGACGAAGCGCAAGTGACGGTA…	27F 1500R
A5-1	JN627191	Sun et al., 2012	Scleronephthya sp				Zhao’an Bay (23u539N; 117u109E) in the East China Sea	whole fragment			Actinobacteria	Actinobacteria	Micromonosporales	Micromonosporaceae	Micromonospora	sp.	99	Custom media, see reference for details	29-AUG-2011	GCAGTCGAGCGGATAGGCCCTTCGGGGTACTCGAGCGGCGAACGGGTGAGTAACACGTGAGCAACCTGCCCCAGGCTTTGGGATAACCCCGGGAAACCGGGGCTAATACCGAATATTACTGCTGATCGCATGGTTGGTGGTGGAAAGTTTTTCGGCTTGGGATGGGCTCGCGGCCTATCAGCTTGTTGGTGGGGTGATGGCCTACCAAGGCGACGACGGGTAGCCGGCCTGAGAGGGCGACCGGCCACACTGGGACTGAGACACGGCCCAGACTCCTACGGGAGGCAGCAGTGGGGAATATTGCACAATGGGCGGAAGCCTGATGCAGCGACGCCGCGTGAGGGATGACGGCCTTCGGGTTGTAAACCTCTTTCAGCAGGGACGAAGCGCAAGTGACGG…	27F 1500R
A6-2	JN627192	Sun et al., 2012	Scleronephthya sp				Zhao’an Bay (23u539N; 117u109E) in the East China Sea	whole fragment			Actinobacteria	Actinobacteria	Micromonosporales	Micromonosporaceae	Micromonospora	sp.	99	Custom media, see reference for details	29-AUG-2011	TGCAGTCGAGCGGAAGGCCCTTCGGGGTACTCGAGCGGCGAACGGGTGAGTAACACGTGAGCAACCTGCCCCAGGCTTTGGGATAACCCCGGGAAACCGGGGCTAATACCGAATATTACTGCTGATCGCATGGTTGGTGGTGGAAAGTTTTTCGGCTTGGGATGGGCTCGCGGCCTATCAGCTTGTTGGTGGGGTGATGGCCTACCAAGGCGACGACGGGTAGCCGGCCTGAGAGGGCGACCGGCCACACTGGGACTGAGACACGGCCCAGACTCCTACGGGAGGCAGCAGTGGGGAATATTGCACAATGGGCGGAAGCCTGATGCAGCGACGCCGCGTGAGGGATGACGGCCTTCGGGTTGTAAACCTCTTTCAGCAGGGACGAAGCGCAAGTGACGG…	27F 1500R
A6-9	JN627193	Sun et al., 2012	Scleronephthya sp				Zhao’an Bay (23u539N; 117u109E) in the East China Sea	whole fragment			Actinobacteria	Actinobacteria	Micromonosporales	Micromonosporaceae	Micromonospora	sp.	100	Custom media, see reference for details	29-AUG-2011	CAGTCGAGCGGAAGGCCCTTCGGGGTACTCGAGCGGCGAACGGGTGAGTAACACGTGAGCAACCTGCCCTAGGCTTTGGGATAACCCTCGGAAACGGGGGCTAATACCGAATACGACCTTCTGCCGCATGGTGGGGGGTGGAAAGTTTTTCGGCCTGGGATGGGCTCGCGGCCTATCAGCTTGTTGGTGGGGTGATGGCCTACCAAGGCGACGACGGGTAGCCGGCCTGAGAGGGCGACCGGCCACACTGGGACTGAGACACGGCCCAGACTCCTACGGGAGGCAGCAGTGGGGAATATTGCACAATGGGCGGAAGCCTGATGCAGCGACGCCGCGTGAGGGATGACGGCCTTCGGGTTGTAAACCTCTTTCAGCAGGGACGAAGCGCAAGTGACGGTA…	27F 1500R
Ag2-3	JQ688009	Yang et al., 2013	Alcyonium gracillimum		Healthy		Zhao’an Bay (23°73′ N, 117°16′ E), the coastal East China Sea		28	https://link.springer.com/article/10.1007/s00248-013-0205-4	Actinobacteria	Actinobacteria	Micrococcales	Micrococcaceae	Micrococcus	sp.	100	glycerol arginine agar (GAA), asparagine peptone agar (APA), and R2A	14-FEB-2012	TTTCAGCTTGTTGGTGAGGTAATGGCTCACCAAGGCGACGACGGGTAGCCGGCCTGAGAGGGTGACCGGCCACACTGGGACTGAGACACGGCCCAGACTCCTACGGGAGGCAGCAGTGGGGAATATTGCACAATGGGCGAAAGCCTGATGCAGCGACGCCGCGTGAGGGATGACGGCCTTCGGGTTGTAAACCTCTTTCAGTAGGGAAGAAGCGAAAGTGACGGTACCTGCAGAAGAAGCACCGGCTAACTACGTGCCAGCAGCCGCGGTAATACGTAGGGTGCGAGCGTTATCCGGAATTATTGGGCGTAAAGAGCTCGTAGGCGGTTTGTCGCGTCTGTCGTGAAAGTCCGGGGCTTAACCCCGGATCTGCGGTGGGTACGGGCAGACTAGAGTGCA…	S-C-Act-0235-a-S-20 S-C-Act-0878-a-A-19	https://link.springer.com/article/10.1007/s00248-013-0205-4
Ag2-19	JQ688010	Yang et al., 2013	Alcyonium gracillimum		Healthy		Zhao’an Bay (23°73′ N, 117°16′ E), the coastal East China Sea		28		Actinobacteria	Actinobacteria	Micrococcales	Micrococcaceae	Kocuria	sp.	99	glycerol arginine agar (GAA), asparagine peptone agar (APA), and R2A	14-FEB-2012	TCGCGGCCCTACAGCTTGTTGGTGAGGTAATGGCTCACCAAGGCGACGACGGGTAGCCGGCCTGAGAGGGTGACCGGCCACACTGGGACTGAGACACGGCCCAGACTCCTACGGGAGGCAGCAGTGGGGAATATTGCACAATGGGCGAAAGCCTGATGCAGCGACGCCGCGTGAGGGATGACGGCCTTCGGGTTGTAAACCTCTTTCAGCAGGGAAGAAGCCACAAGTGACGGTACCTGCAGAAGAAGCGCCGGCTAACTACGTGCCAGCAGCCGCGGTAATACGTAGGGCGCAAGCGTTGTCCGGAATTATTGGGCGTAAAGAGCTCGTAGGCGGTTTGTCGCGTCTGCTGTGAAAGCCCGGGGCTTAACCCCGGGTGTGCAGTGGGTACGGGCAGAC…	S-C-Act-0235-a-S-20 S-C-Act-0878-a-A-19
Ag2-6	JQ688011	Yang et al., 2013	Alcyonium gracillimum		Healthy		Zhao’an Bay (23°73′ N, 117°16′ E), the coastal East China Sea		28		Actinobacteria	Actinobacteria	Streptomycetales	Streptomycetaceae	Streptomyces	sp.	99	glycerol arginine agar (GAA), asparagine peptone agar (APA), and R2A	14-FEB-2012	TTTCACTTGTTGGTGAGGTAGTGGCTCACCAAGGCGACGACGGGTAGCCGGCCTGAGAGGGCGACCGGCCACACTGGGACTGAGACACGGCCCAGACTCCTACGGGAGGCAGCAGTGGGGAATATTGCACAATGGGCGAAAGCCTGATGCAGCGACGCCGCGTGAGGGATGACGGCCTTCGGGTTGTAAACCTCTTTCAGCAGGGAAGAAGCGAAAGTGACGGTACCTGCAGAAGAAGCGCCGGCTAACTACGTGCCAGCAGCCGCGGTAATACGTAGGGCGCAAGCGTTGTCCGGAATTATTGGGCGTAAAGAGCTCGTAGGCGGCTTGTCACGTCGGTTGTGAAAGCCCGGGGCTTAACCCCGGGTCTGCAGTCGATACGGGCAGGCTAGAGTTCGG…	S-C-Act-0235-a-S-20 S-C-Act-0878-a-A-19
Tc3-13	JQ688012	Yang et al., 2013	Tubastraea coccinea		Healthy		Zhao’an Bay (23°73′ N, 117°16′ E), the coastal East China Sea		28		Actinobacteria	Actinobacteria	Micrococcales	Micrococcaceae	Kocuria	sp.	100	glycerol arginine agar (GAA), asparagine peptone agar (APA), and R2A	14-FEB-2012	TGCAAGTCGAACGCTGAAGCACCAGCTTGCTGGTGTGGATGAGTGGCGAACGGGTGAGTAATACGTGAGTAACCTGCCCTTGACTCTGGGATAAGCCCGGGAAACTGGGTCTAATACTGGATGCTACATGTCACCGCATGGTGGTGTGTGGAAAGGGTTTACTGGTCTTGGATGGGCTCACGGCCTATCAGCTTGTTGGTGAGGTAATGGCTCACCAAGGCGACGACGGGTAGCCGGCCTGAGAGGGTGACCGGCCACACTGGGACTGAGACACGGCCCAGACTCCTACGGGAGGCAGCAGTGGGGAATATTGCACAATGGGCGAAAGCCTGATGCAGCGACGCCGCGTGAGGGATGACGGCCTTCGGGTTGTAAACCTCTTTCAGCAGGGAAGAAGCC…	S-C-Act-0235-a-S-20 S-C-Act-0878-a-A-19
Tc3-12	JQ688013	Yang et al., 2013	Tubastraea coccinea		Healthy		Zhao’an Bay (23°73′ N, 117°16′ E), the coastal East China Sea		28		Actinobacteria	Actinobacteria	Micrococcales	Micrococcaceae	Kocuria	sp.	99	glycerol arginine agar (GAA), asparagine peptone agar (APA), and R2A	14-FEB-2012	CCTTACCATGCAGTCGAACGCTGAAGCACCAGCTTGCTGGTGTGGATGAGTGGCGAACGGGTGAGTAATACGTGAGTAACCTGCCCTTGACTCTGGGATAAGCCCGGGAAACTGGGTCTAATACTGGATGCTACATGTCACCGCATGGTGGTGTGTGGAAAGGGTTTACTGGTCTTGGATGGGCTCACGGCCTATCAGCTTGTTGGTGAGGTAATGGCTCACCAAGGCGACGACGGGTAGCCGGCCTGAGAGGGTGACCGGCCACACTGGGACTGAGACACGGCCCAGACTCCTACGGGAGGCAGCAGTGGGGAATATTGCACAATGGGCGAAAGCCTGATGCAGCGACGCCGCGTGAGGGATGACGGCCTTCGGGTTGTAAACCTCTTTCAGCAGGGA…	S-C-Act-0235-a-S-20 S-C-Act-0878-a-A-19
Tc3-19	JQ688014	Yang et al., 2013	Tubastraea coccinea		Healthy		Zhao’an Bay (23°73′ N, 117°16′ E), the coastal East China Sea		28		Actinobacteria	Actinobacteria	Micrococcales	Brevibacteriaceae	Brevibacterium	sp.	99	glycerol arginine agar (GAA), asparagine peptone agar (APA), and R2A	14-FEB-2012	GGGCGACCGGCCACACTGGGACTGAGACACGGCCCAGACTCCTACGGGAGGCAGCAGTGGGGAATATTGCACAATGGGGGAAACCCTGATGCAGCGACGCAGCGTGCGGGATGACGGCCTTCGGGTTGTAAACCGCTTTCAGCAGGGAAGAAGCGAAAGTGACGGTACCTGCAGAAGAAGTACCGGCTAACTACGTGCCAGCAGCCGCGGTAATACGTAGGGTACGAGCGTTGTCCGGAATTATTGGGCGTAAAGAGCTCGTAGGTGGTTGGTCACGTCTGCTGTGGAAACGCAACGCTTAACGTTGCGCGTGCAGTGGGTACGGGCTGACTAGAGTGCAGTAGGGGAGTCTGGAATTCCTGGTGTAGCGGTGAAATGCGCAGATATCAGGAGGAACAC…	S-C-Act-0235-a-S-20 S-C-Act-0878-a-A-19
Tc3-6	JQ688015	Yang et al., 2013	Tubastraea coccinea		Healthy		Zhao’an Bay (23°73′ N, 117°16′ E), the coastal East China Sea		28		Actinobacteria	Actinobacteria	Micrococcales	Brevibacteriaceae	Brevibacterium	sp.	99	glycerol arginine agar (GAA), asparagine peptone agar (APA), and R2A	14-FEB-2012	CAGTCGACGCTGAAGCCGACAGCTTGCTGTTGGTGGATGAGTGGCGAACGGGTGAGTAACACGTGAGTAACCTGCCCCTGATTTCGGGATAAGCCTGGGAAACCGGGTCTAATACCGGATACGACCACCGAACGCATGTTCGGTGGTGGAAAGTTTTTCGATCAGGGATGGGCTCGCGGCCTATCAGCTTGTTGGTGGGGTAATGGCCCACCAAGGCGACGACGGGTAGCCGGCCTGAGAGGGCGACCGGCCACACTGGGACTGAGACACGGCCCAGACTCCTACGGGAGGCAGCAGTGGGGAATATTGCACAATGGGGGAAACCCTGATGCAGCGACGCAGCGTGCGGGATGACGGCCTTCGGGTTGTAAACCGCTTTCAGCAGGGAAGAAGCGAAAG…	S-C-Act-0235-a-S-20 S-C-Act-0878-a-A-19
Tc3-36	JQ688016	Yang et al., 2013	Tubastraea coccinea		Healthy		Zhao’an Bay (23°73′ N, 117°16′ E), the coastal East China Sea		28		Actinobacteria	Actinobacteria	Micromonosporales	Micromonosporaceae	Micromonospora	sp.	99	glycerol arginine agar (GAA), asparagine peptone agar (APA), and R2A	14-FEB-2012	CAGTCGAGCGGAAGGCCCTTCGGGGTACTCGAGCGGCGAACGGGTGAGTAACACGTGAGCAACCTGCCCCAGGCTTTGGGATAACCCCGGGAAACCGGGGCTAATACCGAATATGACCTCCGATCGCATGGTTGGTGGTGGAAAGTTTTTCGGCTTGGGATGGGCTCGCGGCCTATCAGCTTGTTGGTGGGGTGATGGCCTACCAAGGCGACGACGGGTAGCCGGCCTGAGAGGGCGACCGGCCACACTGGGACTGAGACACGGCCCAGACTCCTACGGGAGGCAGCAGTGGGGAATATTGCACAATGGGCGGAAGCCTGATGCAGCGACGCCGCGTGAGGGATGACGGCCTTCGGGTTGTAAACCTCTTTCAGCAGGGACGAAGCGTAAGTGACGGTA…	S-C-Act-0235-a-S-20 S-C-Act-0878-a-A-19
Tc3-1	JQ688017	Yang et al., 2013	Tubastraea coccinea		Healthy		Zhao’an Bay (23°73′ N, 117°16′ E), the coastal East China Sea		28		Actinobacteria	Actinobacteria	Streptomycetales	Streptomycetaceae	Streptomyces	sp.	100	glycerol arginine agar (GAA), asparagine peptone agar (APA), and R2A	14-FEB-2012	GGGGGTGGTCGGTCTACTCTCCATACAGTCGAACGATGAACCTCCTTCGGGAGGGGATTAGTGGCGAACGGGTGAGTAACACGTGGGCAATCTGCCCTGCACTCTGGGACAAGCCCTGGAAACGGGGTCTAATACCGGATACTGACCCGCTTGGGCATCCAAGCGGTTCGAAAGCTCCGGCGGTGCAGGATGAGCCCGCGGCCTATCAGCTTGTTGGTGAGGTAATGGCTCACCAAGGCGACGACGGGTAGCCGGCCTGAGAGGGCGACCGGCCACACTGGGACTGAGACACGGCCCAGACTCCTACGGGAGGCAGCAGTGGGGAATATTGCACAATGGGCGAAAGCCTGATGCAGCGACGCCGCGTGAGGGATGACGGCCTTCGGGTTGTAAACCTCT…	S-C-Act-0235-a-S-20 S-C-Act-0878-a-A-19
Tc3-21	JQ688018	Yang et al., 2013	Tubastraea coccinea		Healthy		Zhao’an Bay (23°73′ N, 117°16′ E), the coastal East China Sea		28		Actinobacteria	Actinobacteria	Streptomycetales	Streptomycetaceae	Streptomyces	sp.	100	glycerol arginine agar (GAA), asparagine peptone agar (APA), and R2A	14-FEB-2012	GAACCGCTTTCGGGCGGGGATTAGTGGCGAACGGGTGAGTAACACGTGGGCAATCTGCCCTGCACTCTGGGACAAGCCCTGGAAACGGGGTCTAATACCGGATATGACTGTCCATCGCATGGTGGATGGTGTAAAGCTCCGGCGGTGCAGGATGAGCCCGCGGCCTATCAGCTTGTTGGTGAGGTAGTGGCTCACCAAGGCGACGACGGGTAGCCGGCCTGAGAGGGCGACCGGCCACACTGGGACTGAGACACGGCCCAGACTCCTACGGGAGGCAGCAGTGGGGAATATTGCACAATGGGCGAAAGCCTGATGCAGCGACGCCGCGTGAGGGATGACGGCCTTCGGGTTGTAAACCTCTTTCAGCAGGGAAGAAGCGAAAGTGACGGTACCTGCAGA…	S-C-Act-0235-a-S-20 S-C-Act-0878-a-A-19
Tc3-16	JQ688019	Yang et al., 2013	Tubastraea coccinea		Healthy		Zhao’an Bay (23°73′ N, 117°16′ E), the coastal East China Sea		28		Actinobacteria	Actinobacteria	Corynebacteriales	Dietziaceae	Dietzia	sp.	97	glycerol arginine agar (GAA), asparagine peptone agar (APA), and R2A	14-FEB-2012	CAGTCGAACGGTAAGGCCCCTTCGGGGGTACACGAGTGGCGAACGGGTGAGTAACACGTGGGTAATCTGCCCTGCACTTCGGGATAAGCCTGGGAAACTGGGTCTAATACCGGATATGAACTCCTGCCGCATGGTGGGGGTTGGAAAGTTTTTCGGTGCAAGATGAACCCCCGGCCTATCAACTTGTTGGTGGGGTAATGGCCTACCAAGGCGACCACCGGTAACCCGGCTGAAAGGGTGATCGGCCACCCTGGGACTGAAACACGGCCCAAACTCCTACGGGAGGCAGCAGTGGGGAATATTGCACAATGGGCGAAAGCCTGATGCAGCGACGCCCCGTGGGGGATGACGGTCTTCGGATTGTAAACCCCTTTTAGTAGGGACGAAGCGCAAGTGACG…	S-C-Act-0235-a-S-20 S-C-Act-0878-a-A-19
Ag2-30	JX008001	Yang et al., 2013	Tubastraea coccinea		Healthy		Zhao’an Bay (23°73′ N, 117°16′ E), the coastal East China Sea		28		Actinobacteria	Actinobacteria	Micrococcales	Micrococcaceae	Kocuria	sp.	99	glycerol arginine agar (GAA), asparagine peptone agar (APA), and R2A	27-APR-2012	GCAGTCGACGCTGAAGCACAGCTTGCTGGTGTGGATGAGTGGCGAACGGGTGAGTAATACGTGAGTAACCTGCCCTTGACTCTGGGATAAGCCCGGGAAACTGGGTCTAATACTGGATGCTACATGTCACCGCATGGTGGTGTGTGGAAAGGGTTTACTGGTCTTGGATGGGCTCACGGCCTATCAGCTTGTTGGTGAGGTAATGGCTCACCAAGGCGACGACGGGTAGCCGGCCTGAGAGGGTGACCGGCCACACTGGGACTGAGACACGGCCCAGACTCCTACGGGAGGCAGCAGTGGGGAATATTGCACAATGGGCGAAAGCCTGATGCAGCGACGCCGCGTGAGGGATGACGGCCTTCGGGTTGTAAACCTCTTTCAGCAGGGAAGAAGCCACAA…	S-C-Act-0235-a-S-20 S-C-Act-0878-a-A-19
11456	JX454450	Li et al., 2014	scleractinian corals			27–28	Luhuitou fringing reef (18°13′N, 109°28′E)	Tissue slurry homogenates		https://link.springer.com/article/10.1007/s10482-014-0233-1	Actinobacteria	Actinobacteria	Pseudonocardiales	Pseudonocardiaceae	Amycolatopsis	sp.	99	marine agar, yeast extract agar, trehalose proline agar, raffinose histidine agar, pyruvic acid sodium asparagine agar	01-AUG-2012	TGCAGTCGAACGCTGAACCGGTTTCGGCCGGGGATGAGTGGCGAACGGGTGAGTAACACGTGGGTAATCTGCCCTGTACTCTGGGATAAGCCTGGGAAACTGGGTCTAATACCGGATACGACCACTACAGGCATCTGTGGTGGTGGAAAGTTCCGGCGGTATGGGATGAACCCGCGGCCTATCAGCTTGTTGGTGGGGTAATGGCCTACCAAGGCGACGACGGGTAGCCGGCCTGAGAGGGTGACCGGCCACACTGGGACTGAGACACGGCCCAGACTCCTACGGGAGGCAGCAGTGGGGAATATTGCACAATGGGCGCAAGCCTGATGCAGCGACGCCGCGTGAGGGATGACGGCCTTCGGGTTGTAAACCTCTTTCGCCAGGGACGAAGCGCAAGTG…	8-27f 152-1504r	https://link.springer.com/article/10.1007/s10482-014-0233-1
11455	JX454451	Li et al., 2014	scleractinian corals			27–28	Luhuitou fringing reef (18°13′N, 109°28′E)	Tissue slurry homogenates			Actinobacteria	Actinobacteria	Pseudonocardiales	Pseudonocardiaceae	Amycolatopsis	sp.	99	marine agar, yeast extract agar, trehalose proline agar, raffinose histidine agar, pyruvic acid sodium asparagine agar	01-AUG-2012	GTCGAACGCTGAACCGGTTTCGGCCGGGGATGAGTGGCGAACGGGTGAGTAACACGTGGGTAATCTGCCCTGTACTCTGGGATAAGCCTGGGAAACTGGGTCTAATACCGGATACGACCACTACAGGCATCTGGGGTGGTGGAAAGTTCCGGCGGTATGGGATGAACCCGCGGCCTATCAGCTTGTTGGTGGGGTAATGGCCTACCAAGGCGACGACGGGTAGCCGGCCTGAGAGGGTGACCGGCCACACTGGGACTGAGACACGGCCCAGACTCCTACGGGAGGCAGCAGTGGGGAATATTGCACAATGGGCGCAAGCCTGATGCAGCGACGCCGCGTGAGGGATGACGGCCTTCGGGTTGTAAACCTCTTTCGCCAGGGACGAAGCGCAAGTGACGG…	8-27f 152-1504r
11427	JX454452	Li et al., 2014	scleractinian corals			27–28	Luhuitou fringing reef (18°13′N, 109°28′E)	Tissue slurry homogenates			Actinobacteria	Actinobacteria	Micrococcales	Dermabacteraceae	Brachybacterium	sp.	99	marine agar, yeast extract agar, trehalose proline agar, raffinose histidine agar, pyruvic acid sodium asparagine agar	01-AUG-2012	TGCAGTCGACGATGACGGCCGTGCTTGCACGGTCTGATTAGTGGCGAACGGGTGAGTAACACGTGAGTAACCTGCCCTCCACTTCGGGATAACCTCGGGAAATCGTGGCTAATACCGGATATGAGCACTCATCGCATGGTGGGTGTTGGAAAGATTTATCGGTGGGGGATGGACTCGCGGCCTATCAGTTTGTTGGTGAGGTGATGGCTCACCAAGACGATGACGGGTAGCCGGCCTGAGAGGGCGACCGGCCACACTGGGACTGAGACACGGCCCAGACTCCTACGGGAGGCAGCAGTGGGGAATATTGCACAATGGGCGAAAGCCTGATGCAGCGACGCCGCGTGAGGGATGACGGCCTTCGGGTTGTAAACCTCTTTCAGTAGGGAAGAAGCGAGA…	8-27f 152-1504r
11362	JX454453	Li et al., 2014	scleractinian corals			27–28	Luhuitou fringing reef (18°13′N, 109°28′E)	Tissue slurry homogenates			Actinobacteria	Actinobacteria	Micrococcales	Brevibacteriaceae	Brevibacterium	sp.	100	marine agar, yeast extract agar, trehalose proline agar, raffinose histidine agar, pyruvic acid sodium asparagine agar	01-AUG-2012	TGCAAGTCGAACGCTGAAGCCGACAGCTTGCTGTTGGTGGATGAGTGGCGAACGGGTGAGTAACACGTGAGTAACCTGCCCCTGATTTCGGGATAAGCCTGGGAAACTGGGTCTAATACCGGATATGACCAATCCTTGCATGAGGGTTGGTGGAAAGTTTTTCGATCGGGGATGGGCTCGCGGCCTATCAGCTTGTTGGTGGGGTAATGGCCTACCAAGGCGACGACGGGTAGCCGGCCTGAGAGGGCGACCGGCCACACTGGGACTGAGACACGGCCCAGACTCCTACGGGAGGCAGCAGTGGGGAATATTGCACAATGGGGGAAACCCTGATGCAGCGACGCAGCGTGCGGGATGACGGCCTTCGGGTTGTAAACCGCTTTCAGCAGGGAAGAAGCG…	8-27f 152-1504r
11343	JX454454	Li et al., 2014	scleractinian corals			27–28	Luhuitou fringing reef (18°13′N, 109°28′E)	Tissue slurry homogenates			Actinobacteria	Actinobacteria	Micrococcales	Brevibacteriaceae	Brevibacterium	sp.	99	marine agar, yeast extract agar, trehalose proline agar, raffinose histidine agar, pyruvic acid sodium asparagine agar	01-AUG-2012	ATGCAGTCGAACGCTGAGCCGACAGCTTGCTGTTGGTGGATGAGTGGCGAACGGGTGAGTAACACGTGAGTAACCTGCCCCTGATTTCGGGATAAGCCTGGGAAACTGGGTCTAATACCGGATATGACCAATCCTTGCATGAGGGTTGGTGGAAAGTTTTTCGATCGGGGATGGGCTCGCGGCCTATCAGCTTGTTGGTGGGGTAATGGCCTACCAAGGCGACGACGGGTAGCCGGCCTGAGAGGGCGACCGGCCACACTGGGACTGAGACACGGCCCAGACTCCTACGGGAGGCAGCAGTGGGGAATATTGCACAATGGGGGAAACCCTGATGCAGCGACGCAGCGTGCGGGATGACGGCCTTCGGGTTGTAAACCGCTTTCAGCAGGGAAGAAGCGA…	8-27f 152-1504r
11434	JX454455	Li et al., 2014	scleractinian corals			27–28	Luhuitou fringing reef (18°13′N, 109°28′E)	Tissue slurry homogenates			Actinobacteria	Actinobacteria	Micrococcales	Brevibacteriaceae	Brevibacterium	sp.	97	marine agar, yeast extract agar, trehalose proline agar, raffinose histidine agar, pyruvic acid sodium asparagine agar	01-AUG-2012	TGCAGTCGAACGCTGAAGCCTGGAGCTTGCTTCGGGTGGATGAGTGGCGAACGGGTGAGTAACACGTGAGTAACCTGCCCCTGACTTCGGGATAAGCCTGGGAAACTGGGTCTAATACCGGATATGACCTGCTACCGCATGGTGGTGGGTGGAAAGTTTTTTCGGTTGGGGATGGGCTCGCGGCCTATCAGCTTGATGGTGGGGTAATGGCCTACCATGGCGACGACGGGTAGCCGGCCTGAGAGGGCGACCGGCCACACTGGGACTGAGACACGGCCCAGACTCCTACGGGAGGCAGCAGTGGGGAATATTGCACAATGGGGGAAACCCTGATGCAGCGACGCAGCGTGCGGGATGACGGCCTTCGGGTTGTAAACCGCTTTCAGTAGGGAAGAAGCC…	8-27f 152-1504r
11418	JX454456	Li et al., 2014	scleractinian corals			27–28	Luhuitou fringing reef (18°13′N, 109°28′E)	Tissue slurry homogenates			Actinobacteria	Actinobacteria	Corynebacteriales	Gordoniaceae	Gordonia	sp.	100	marine agar, yeast extract agar, trehalose proline agar, raffinose histidine agar, pyruvic acid sodium asparagine agar	01-AUG-2012	CTTGCTGGGTACTCGAGTGGCGAACGGGTGAGTAACACGTGGGTGATCTGCCCTGCACTCTGGGATAAGCCTGGGAAACTGGGTCTAATACCGGATATGACCGACTGTCGCATGGTGGTTGGTGGAAAGCTTTTGCGGTGTGGGATGGGCCCGCGGCCTATCAGCTTGTTGGTGGGGTAATGGCCTACCAAGGCGACGACGGGTAGCCGACCTGAGAGGGTGATCGGCCACACTGGGACTGAGACACGGCCCAGACTCCTACGGGAGGCAGCAGTGGGGAATATTGCACAATGGGCGCAAGCCTGATGCAGCGACGCCGCGTGAGGGATGACGGCCTTCGGGTTGTAAACCTCTTTCACCAGGGACGAAGCGTGAGTGACGGTACCTGGAGAAGAAGCA…	8-27f 152-1504r
11785	JX454457	Li et al., 2014	scleractinian corals			27–28	Luhuitou fringing reef (18°13′N, 109°28′E)	Tissue slurry homogenates			Actinobacteria	Actinobacteria	Jiangellales	Jiangellaceae	Jiangella	sp.	99	marine agar, yeast extract agar, trehalose proline agar, raffinose histidine agar, pyruvic acid sodium asparagine agar	01-AUG-2012	GTCGAGCGGAAGGCCCTTCGGGGTACTCGAGCGGCGAACGGGTGAGTAACACGTGGGTAACCTGCCTTCAGCTCTGGGATAAGCCTGGGAAACTGGGTCTAATACCGGATACGACACGCGACCGCATGGTTGTGTGTGGAAAGTTTTTCGGCTGGAGATGGACTCGCGGCCTATCAGCTTGTTGGTGGGGTAGTGGCCTACCAAGGCGATGACGGGTAGCCGGCCTGAGAGGGCGACCGGCCACACTGGGACTGAGACACGGCCCAGACTCCTACGGGAGGCAGCAGTGGGGAATATTGCGCAATGGGCGGAAGCCTGACGCAGCAACGCCGCGTGAGGGATGACGGCCTTCGGGTTGTAAACCTCTTTCAGCGCTGACGAAGCCTTCGGGTGACGGTA…	8-27f 152-1504r
11458	JX454458	Li et al., 2014	scleractinian corals			27–28	Luhuitou fringing reef (18°13′N, 109°28′E)	Tissue slurry homogenates			Actinobacteria	Actinobacteria	Jiangellales	Jiangellaceae	Jiangella	sp.	99	marine agar, yeast extract agar, trehalose proline agar, raffinose histidine agar, pyruvic acid sodium asparagine agar	01-AUG-2012	TGCAAGTCGAGCGGAAGGCCCTTCGGGGTACTCGAGCGGCGAACGGGTGAGTAACACGTGGGTAACCTGCCTTCAGCTCTGGGATAAGCCTGGGAAACTGGGTCTAATACCGGATACGACACGCGACCGCATGGTTGTGTGTGGAAAGTTTTTCGGCTGGAGATGGACTCGCGGCCTATCAGCTTGTTGGTGGGGTAGTGGCCTACCAAGGCGATGACGGGTAGCCGGCCTGAGAGGGCGACCGGCCACACTGGGACTGAGACACGGCCCAGACTCCTACGGGAGGCAGCAGTGGGGAATATTGCGCAATGGGCGGAAGCCTGACGCAGCAACGCCGCGTGAGGGATGACGGCCTTCGGGTTGTAAACCTCTTTCAGCGCTGACGAAGCCTTCGGGTGA…	8-27f 152-1504r
11534	JX454459	Li et al., 2014	scleractinian corals			27–28	Luhuitou fringing reef (18°13′N, 109°28′E)	Tissue slurry homogenates			Actinobacteria	Actinobacteria	Jiangellales	Jiangellaceae	Jiangella	sp.	99	marine agar, yeast extract agar, trehalose proline agar, raffinose histidine agar, pyruvic acid sodium asparagine agar	01-AUG-2012	TGCAGTCGAGCGGAAGGCCCTTCGGGGTACTCGAGCGGCGAACGGGTGAGTAACACGTGGGTAACCTGCCTTCAGCTCTGGGATAAGCCTGGGAAACTGGGTCTAATACTGGATATGACGCATCACCGCATGGTGTGTGTGTGGAAAGTTTTTCGGCTGAAGATGGACTCGCGGCCTATCAGCTTGTTGGTGGGGTAATGGCCTACCAAGGCTTTGACGGGTAGCCGGCCTGAGAGGGCGACCGGCCACACTGGGACTGAGACACGGCCCAGACTCCTACGGGAGGCAGCAGTGGGGAATATTGCGCAATGGGCGGAAGCCTGACGCAGCAACGCCGCGTGAGGGATGACGGCCTTCGGGTTGTAAACCTCTTTCAGCGCTGACGAAGCTTTCGGGTGA…	8-27f 152-1504r
11431	JX454460	Li et al., 2014	scleractinian corals			27–28	Luhuitou fringing reef (18°13′N, 109°28′E)	Tissue slurry homogenates			Actinobacteria	Actinobacteria	Micrococcales	Micrococcaceae	Microbacterium	sp.	99	marine agar, yeast extract agar, trehalose proline agar, raffinose histidine agar, pyruvic acid sodium asparagine agar	01-AUG-2012	TGCAGTCGACGATGAAGCCTCACTTGTGGGGTGGATTAGTGGCGAACGGGTGAGTAACACGTGAGCAACCTGCCCCTGACTCTGGGATAAGCGCTGGAAACGGCGTCTAATACTGGATACGAGTAGTGATCGCATGGTCAGCTACTGGAAAGATTTTTTGGTTGGGGATGGGCTCGCGGCCTATCAGCTTGTTGGTGAGGTAATGGCTCACCAAGGCGTCGACGGGTAGCCGGCCTGAGAGGGTGACCGGCCACACTGGGACTGAGACACGGCCCAGACTCCTACGGGAGGCAGCAGTGGGGAATATTGCACAATGGGCGGAAGCCTGATGCAGCAACGCCGCGTGAGGGATGACGGCCTTCGGGTTGTAAACCTCTTTTAGCAGGGAAGAAGCGTGAG…	8-27f 152-1504r
11524	JX454461	Li et al., 2014	scleractinian corals			27–28	Luhuitou fringing reef (18°13′N, 109°28′E)	Tissue slurry homogenates			Actinobacteria	Actinobacteria	Micromonosporales	Micromonosporaceae	Micromonospora	sp.	100	marine agar, yeast extract agar, trehalose proline agar, raffinose histidine agar, pyruvic acid sodium asparagine agar	01-AUG-2012	TGCAGTCGAGCGGAAGGCCCTTCGGGGTACTCGAGCGGCGAACGGGTGAGTAACACGTGAGCAACCTGCCCCAGGCTTTGGGATAACCCCGGGAAACCGGGGCTAATACCGAATATGACCTCTGACCGCATGGTTGGTGGTGGAAAGTTTTTCGGCTTGGGATGGGCTCGCGGCCTATCAGCTTGTTGGTGGGGTGATGGCCTACCAAGGCGACGACGGGTAGCCGGCCTGAGAGGGCGACCGGCCACACTGGGACTGAGACACGGCCCAGACTCCTACGGGAGGCAGCAGTGGGGAATATTGCACAATGGGCGGAAGCCTGATGCAGCGACGCCGCGTGAGGGATGACGGCCTTCGGGTTGTAAACCTCTTTCAGCAGGGACGAAGCGTAAGTGACGG…	8-27f 152-1504r
11453	JX454462	Li et al., 2014	scleractinian corals			27–28	Luhuitou fringing reef (18°13′N, 109°28′E)	Tissue slurry homogenates			Actinobacteria	Actinobacteria	Streptosporangiales	Nocardiopsaceae	Nocardiopsis	sp.	100	marine agar, yeast extract agar, trehalose proline agar, raffinose histidine agar, pyruvic acid sodium asparagine agar	01-AUG-2012	TGCAGTCGAGCGGTAAGGCCCTTCGGGGTACACGAGCGGCGAACGGGTGAGTAACACGTGAGCAACCTGCCCCTGACTCCGGGATAAGCGGTGGAAACGCCGTCTAATACCGGATACGACCCGCCACCTCATGGTGGAGGGTGGAAAGTTTTTCGGTCAGGGATGGGCTCGCGGCCTATCAGCTTGTTGGTGGGGTAACGGCCTACCAAGGCGATTACGGGTAGCCGGCCTGAGAGGGCGACCGGCCACACTGGGACTGAGACACGGCCCAGACTCCTGCGGGAGGCAGCAGTGGGGAATATTGCGCAATGGGCGAAAGCCTGACGCAGCGACGCCGCGTGGGGGATGACGGCCTTCGGGTTGTAAACCTCTTTTACCACCAACGCAGGCTCGAAGTTC…	8-27f 152-1504r
11449	JX454463	Li et al., 2014	scleractinian corals			27–28	Luhuitou fringing reef (18°13′N, 109°28′E)	Tissue slurry homogenates			Actinobacteria	Actinobacteria	Streptosporangiales	Nocardiopsaceae	Nocardiopsis	sp.	100	marine agar, yeast extract agar, trehalose proline agar, raffinose histidine agar, pyruvic acid sodium asparagine agar	01-AUG-2012	TGCAAGTCGAGCGGTAAGGCCCTTCGGGGTACACGAGCGGCGAACGGGTGAGTAACACGTGAGCAACCTGCCCCTGACTCTGGGATAAGCGGTGGAAACGCCGTCTAATACCGGATACGACCCGCCACCTCATGGTGGAGGGTGGAAAGTTTTTCGGTCAGGGATGGGCTCGCGGCCTATCAGCTTGTTGGTGGGGTAACGGCCTACCAAGGCGATTACGGGTAGCCGGCCTGAGAGGGCGACCGGCCACACTGGGACTGAGACACGGCCCAGACTCCTGCGGGAGGCAGCAGTGGGGAATATTGCGCAATGGGCGAAAGCCTGACGCAGCGACGCCGCGTGGGGGATGACGGCCTTCGGGTTGTAAACCTCTTTTACCACCAACGCAGGCTCGAAGTT…	8-27f 152-1504r
11460	JX454464	Li et al., 2014	scleractinian corals			27–28	Luhuitou fringing reef (18°13′N, 109°28′E)	Tissue slurry homogenates			Actinobacteria	Actinobacteria	Streptosporangiales	Nocardiopsaceae	Nocardiopsis	sp.	100	marine agar, yeast extract agar, trehalose proline agar, raffinose histidine agar, pyruvic acid sodium asparagine agar	01-AUG-2012	CCTTCGGGGTACACGAGCGGCGAACGGGTGAGTAACACGTGAGCAACCTGCCCCTGACTCCGGGATAAGCGGTGGAAACGCCGTCTAATACCGGATACGACCCTCCTCCGCATGGTGGGGGGTGGAAAGTTTTTTCGGTCGGGGATGGGCTCGCGGCCTATCAGCTTGTTGGTGGGGTAACGGCCTACCAAGGCGATTACGGGTAGCCGGCCTGAGAGGGCGACCGGCCACACTGGGACTGAGACACGGCCCAGACTCCTGCGGGAGGCAGCAGTGGGGAATATTGCGCAATGGGCGAAAGCCTGACGCAGCGACGCCGCGTGGGGGATGACGGCCTTCGGGTTGTAAACCTCTTTTACCACTCACGCAGGCCCCACGTTTTCGTGGGGTTGACGGTAG…	8-27f 152-1504r
11529	JX454465	Li et al., 2014	scleractinian corals			27–28	Luhuitou fringing reef (18°13′N, 109°28′E)	Tissue slurry homogenates			Actinobacteria	Actinobacteria	Pseudonocardiales	Pseudonocardiaceae	Prauserella	sp.	100	marine agar, yeast extract agar, trehalose proline agar, raffinose histidine agar, pyruvic acid sodium asparagine agar	01-AUG-2012	CGCTGAAGCTCAGCTTGCTGGGTGGATGAGTGGCGAACGGGTGAGTAACACGTGGGTAATCTGCCCTGTACTCTGGGATAAGCCTGGGAAACTGGGTCTAATACCGGATAGGACCATTGCAGGCATCTGTGGTGGTGGAAAGCTTCGGCGGTACAGGTTGAGCCCGCGGCCTATCAGCTTGTTGGTGGGGTGATGGCCTACCAAGGCGGTGACGGGTAGCCGGCCTGAGAGGGCGACCGGCCACACTGGGACTGAGACACGGCCCAGACTCCTACGGGAGGCAGCAGTGGGGAATATTGCACAATGGGCGGAAGCCTGATGCAGCGACGCCGCGTGAGGGATGACGGCCTTCGGGTTGTAAACCTCTTTCGCCAGGGACGAAGGGTGACTGACGGTACC…	8-27f 152-1504r
11527	JX454466	Li et al., 2014	scleractinian corals			27–28	Luhuitou fringing reef (18°13′N, 109°28′E)	Tissue slurry homogenates			Actinobacteria	Actinobacteria	Streptomycetales	Streptomycetaceae	Streptomyces	sp.	100	marine agar, yeast extract agar, trehalose proline agar, raffinose histidine agar, pyruvic acid sodium asparagine agar	01-AUG-2012	TGCAGTCGAACGATGAAGCCGCTTCGGTGGTGGATTAGTGGCGAACGGGTGAGTAACACGTGGGCAATCTGCCCTTCACTCTGGGACAAGCCCTGGAAACGGGGTCTAATACCGGATAACACTCTGTCCCGCATGGGACGGGGTTAAAAGCTCCGGCGGTGAAGGATGAGCCCGCGGCCTATCAGCTTGTTGGTGGGGTAATGGCCTACCAAGGCGACGACGGGTAGCCGGCCTGAGAGGGCGACCGGCCACACTGGGACTGAGACACGGCCCAGACTCCTACGGGAGGCAGCAGTGGGGAATATTGCACAATGGGCGAAAGCCTGATGCAGCGACGCCGCGTGAGGGATGACGGCCTTCGGGTTGTAAACCTCTTTCAGCAGGGAAGAAGCGAAAGTG…	8-27f 152-1504r
11531	JX454467	Li et al., 2014	scleractinian corals			27–28	Luhuitou fringing reef (18°13′N, 109°28′E)	Tissue slurry homogenates			Actinobacteria	Actinobacteria	Streptomycetales	Streptomycetaceae	Streptomyces	sp.	100	marine agar, yeast extract agar, trehalose proline agar, raffinose histidine agar, pyruvic acid sodium asparagine agar	01-AUG-2012	TCGGGAGGGGATTAGTGGCGAACGGGTGAGTAACACGTGGGCAATCTGCCCTGCACTCTGGGACAAGCCCTGGAAACGGGGTCTAATACCGGATACTGACCCGCTTGGGCATCCAAGCGGTTCGAAAGCTCCGGCGGTGCAGGATGAGCCCGCGGCCTATCAGCTTGTTGGTGAGGTAATGGCTCACCAAGGCGACGACGGGTAGCCGGCCTGAGAGGGCGACCGGCCACACTGGGACTGAGACACGGCCCAGACTCCTACGGGAGGCAGCAGTGGGGAATATTGCACAATGGGCGAAAGCCTGATGCAGCGACGCCGCGTGAGGGATGACGGCCTTCGGGTTGTAAACCTCTTTCAGCAGGGAAGAAGCGAAAGTGACGGTACCTGCAGAAGAAGCGC…	8-27f 152-1504r
11416	JX454468	Li et al., 2014	scleractinian corals			27–28	Luhuitou fringing reef (18°13′N, 109°28′E)	Tissue slurry homogenates			Actinobacteria	Actinobacteria	Corynebacteriales	Tsukamurellaceae	Tsukamurella	sp.	100	marine agar, yeast extract agar, trehalose proline agar, raffinose histidine agar, pyruvic acid sodium asparagine agar	01-AUG-2012	TGCAGTCGAACGGTAAGGCCCCTTCGGGGGTACACGAGTGGCGAACGGGTGAGTAACACGTGGGTGACCTGCCCTGTACTTCGGGATAAGCCTGGGAAACTGGGTCTAATACCGGATATGACCTTCCCCTGCATGGGGGTTGGTGGAAAGCTTTTGCGGTACAGGATGGGCCCGCGGCCTATCAGCTTGTTGGTGGGGTAATGGCCTACCAAGGCGACGACGGGTAGCCGGCCTGAGAGGGCGACCGGCCACACTGGGACTGAGACACGGCCCAGACTCCTACGGGAGGCAGCAGTGGGGAATATTGCACAATGGGCGAAAGCCTGATGCAGCGACGCCGCGTGAGGGATGACGGCCTTCGGGTTGTAAACCTCTTTCAGTAGGGACGAAGCGCAAGTG…	8-27f 152-1504r
11347	JX454469	Li et al., 2014	scleractinian corals			27–28	Luhuitou fringing reef (18°13′N, 109°28′E)	Tissue slurry homogenates			Actinobacteria	Actinobacteria	Streptosporangiales	Nocardiopsaceae	Nocardiopsis	sp.	100	marine agar, yeast extract agar, trehalose proline agar, raffinose histidine agar, pyruvic acid sodium asparagine agar	01-AUG-2012	TGCAGTCGAGCGGTAAGGCCCTTCGGGGTACACGAGCGGCGAACGGGTGAGTAACACGTGAGCAACCTGCCCCTGACTCTGGGATAAGCGGTGGAAACGCCGTCTAATACCGGATACGACCTTCCGCCTCATGGTGGAGGGTGGAAAGTTTTTTCGGTCAGGGATGGGCTCGCGGCCTATCAGCTTGTTGGTGGGGTAACGGCCTACCAAGGCGATTACGGGTAGCCGGCCTGAGAGGGCGACCGGCCACACTGGGACTGAGACACGGCCCAGACTCCTGCGGGAGGCAGCAGTGGGGAATATTGCGCAATGGGCGAAAGCCTGACGCAGCGACGCCGCGTGGGGGATGACGGCCTTCGGGTTGTAAACCTCTTTTACCACCAACGCAGGCTCCGGGTT…	8-27f 152-1504r
11454	JX454470	Li et al., 2014	scleractinian corals			27–28	Luhuitou fringing reef (18°13′N, 109°28′E)	Tissue slurry homogenates			Actinobacteria	Actinobacteria	Micrococcales	Dermabacteraceae	Brachybacterium	sp.	99	marine agar, yeast extract agar, trehalose proline agar, raffinose histidine agar, pyruvic acid sodium asparagine agar	01-AUG-2012	TCGAACGATGACGGCCGTGCTTGCACGGTCTGATTAGTGGCGAACGGGTGAGTAACACGTGAGTAACCTGCCCTCCACTTCGGGATAACCTCGGGAAATCGTGGCTAATACCGGATATGAGCACTCATCGCATGGTGGGTGTTGGAAAGATTTATCGGTGGGGGATGGACTCGCGGCCTATCAGTTTGTTGGTGAGGTGATGGCTCACCAAGACGATGACGGGTAGCCGGCCTGAGAGGGCGACCGGCCACACTGGGACTGAGACACGGCCCAGACTCCTACGGGAGGCAGCAGTGGGGAATATTGCACAATGGGCGAAAGCCTGATGCAGCGACGCCGCGTGAGGGATGACGGCCTTCGGGTTGTAAACCTCTTTCAGTAGGGAAGAAGCGAGAGTGA…	8-27f 152-1504r
11457	JX454471	Li et al., 2014	scleractinian corals			27–28	Luhuitou fringing reef (18°13′N, 109°28′E)	Tissue slurry homogenates			Actinobacteria	Actinobacteria	Pseudonocardiales	Pseudonocardiaceae	Pseudonocardia	sp.	99	marine agar, yeast extract agar, trehalose proline agar, raffinose histidine agar, pyruvic acid sodium asparagine agar	01-AUG-2012	GCCCTTTCGGGGGTACACGAGCGGCGAACGGGTGAGTAACACGTGGGTGACCTGCCCTCCACTCTGGGATAAGCCTGGGAAACTGGGTCTAATACCGGATAAGACACGTTGATGCATGTCTTCGTGTGGAAAGTTTTTTCGGTGGGGGATGGGCCCGCGGCCTATCAGCTTGTTGGTGGGGTGATGGCCTACCAAGGCGGTGACGGGTAGCCGGCCTGAGAGGGCGACCGGCCACACTGGGACTGAGACACGGCCCAGACTCCTACGGGAGGCAGCAGTGGGGAATATTGCGCAATGGGCGGAAGCCTGACGCAGCGACGCCGCGTGGGGGATGACGGCCTTCGGGTTGTAAACCTCTTTCGCCAGGGACGAAGCTTTTGTGACGGTACCTGGAGAAGA…	8-27f 152-1504r
11520	JX454472	Li et al., 2014	scleractinian corals			27–28	Luhuitou fringing reef (18°13′N, 109°28′E)	Tissue slurry homogenates			Actinobacteria	Actinobacteria	Streptosporangiales	Nocardiopsaceae	Nocardiopsis	sp.	100	marine agar, yeast extract agar, trehalose proline agar, raffinose histidine agar, pyruvic acid sodium asparagine agar	01-AUG-2012	TGCAAGTCGAGCGGTAAGGCCCTTCGGGGTACACGAGCGGCGAACGGGTGAGTAACACGTGAGCAACCTGCCCCTGACTCTGGGATAAGCGGTGGAAACGCCGTCTAATACCGGATACGACCTTCCGCCTCATGGTGGAGGGTGGAAAGTTTTTTCGGTCAGGGATGGGCTCGCGGCCTATCAGCTTGTTGGTGGGGTAACGGCCTACCAAGGCGATTACGGGTAGCCGGCCTGAGAGGGCGACCGGCCACACTGGGACTGAGACACGGCCCAGACTCCTGCGGGAGGCAGCAGTGGGGAATATTGCGCAATGGGCGAAAGCCTGACGCAGCGACGCCGCGTGGGGGATGACGGCCTTCGGGTTGTAAACCTCTTTTACCACCAACGCAGGCTCCGGGT…	8-27f 152-1504r
11409	JX454473	Li et al., 2014	scleractinian corals			27–28	Luhuitou fringing reef (18°13′N, 109°28′E)	Tissue slurry homogenates			Actinobacteria	Actinobacteria	Micrococcales	Brevibacteriaceae	Brevibacterium	sp.	100	marine agar, yeast extract agar, trehalose proline agar, raffinose histidine agar, pyruvic acid sodium asparagine agar	01-AUG-2012	TGCAGTCGAACGCTGAAGCCGACAGCTTGCTGTTGGTGGATGAGTGGCGAACGGGTGAGTAACACGTGAGTAACCTGCCCCTGATTTCGGGATAAGCCTGGGAAACTGGGTCTAATACCGGATATGACCAATCCTTGCATGAGGGTTGGTGGAAAGTTTTTCGATCGGGGATGGGCTCGCGGCCTATCAGCTTGTTGGTGGGGTAATGGCCTACCAAGGCGACGACGGGTAGCCGGCCTGAGAGGGCGACCGGCCACACTGGGACTGAGACACGGCCCAGACTCCTACGGGAGGCAGCAGTGGGGAATATTGCACAATGGGGGAAACCCTGATGCAGCGACGCAGCGTGCGGGATGACGGCCTTCGGGTTGTAAACCGCTTTCAGCAGGGAAGAAGCGA…	8-27f 152-1504r
11410	JX454474	Li et al., 2014	scleractinian corals			27–28	Luhuitou fringing reef (18°13′N, 109°28′E)	Tissue slurry homogenates			Actinobacteria	Actinobacteria	Micrococcales	Brevibacteriaceae	Brevibacterium	sp.	100	marine agar, yeast extract agar, trehalose proline agar, raffinose histidine agar, pyruvic acid sodium asparagine agar	01-AUG-2012	GCCGACAGCTTGCTGTTGGTGGATGAGTGGCGAACGGGTGAGTAACACGTGAGTAACCTGCCCCTGATTTCGGGATAAGCCTGGGAAACTGGGTCTAATACCGGATATGACCAATCCTTGCATGAGGGTTGGTGGAAAGTTTTTCGATCGGGGATGGGCTCGCGGCCTATCAGCTTGTTGGTGGGGTAATGGCCTACCAAGGCGACGACGGGTAGCCGGCCTGAGAGGGCGACCGGCCACACTGGGACTGAGACACGGCCCAGACTCCTACGGGAGGCAGCAGTGGGGAATATTGCACAATGGGGGAAACCCTGATGCAGCGACGCAGCGTGCGGGATGACGGCCTTCGGGTTGTAAACCGCTTTCAGCAGGGAAGAAGCGAAAGTGACGGTACCTGCA…	8-27f 152-1504r
11413	JX454475	Li et al., 2014	scleractinian corals			27–28	Luhuitou fringing reef (18°13′N, 109°28′E)	Tissue slurry homogenates			Actinobacteria	Actinobacteria	Micrococcales	Micrococcaceae	Micrococcus	sp.	100	marine agar, yeast extract agar, trehalose proline agar, raffinose histidine agar, pyruvic acid sodium asparagine agar	01-AUG-2012	TGCAGTCGACGATGAAGCCCAGCTTGCTGGGTGGATTAGTGGCGAACGGGTGAGTAACACGTGAGTAACCTGCCCTTAACTCTGGGATAAGCCTGGGAAACTGGGTCTAATACCGGATAGGAGCGTCCACCGCATGGTGGGTGTTGGAAAGATTTATCGGTTTTGGATGGACTCGCGGCCTATCAGCTTGTTGGTGAGGTAATGGCTCACCAAGGCGACGACGGGTAGCCGGCCTGAGAGGGTGACCGGCCACACTGGGACTGAGACACGGCCCAGACTCCTACGGGAGGCAGCAGTGGGGAATATTGCACAATGGGCGCAAGCCTGATGCAGCGACGCCGCGTGAGGGATGACGGCCTTCGGGTTGTAAACCTCTTTCAGTAGGGAAGAAGCGAAAGT…	8-27f 152-1504r
11394	JX454476	Li et al., 2014	scleractinian corals			27–28	Luhuitou fringing reef (18°13′N, 109°28′E)	Tissue slurry homogenates			Actinobacteria	Actinobacteria	Micrococcales	Dermabacteraceae	Brachybacterium	sp.	99	marine agar, yeast extract agar, trehalose proline agar, raffinose histidine agar, pyruvic acid sodium asparagine agar	01-AUG-2012	TGCAGTCGACGATGACGGCCGTGCTTGCACGGTCTGATTAGTGGCGAACGGGTGAGTAACACGTGAGTAACCTGCCCTCCACTTCGGGATAACCTCGGGAAATCGTGGCTAATACCGGATATGAGCACTCATCGCATGGTGGGTGTTGGAAAGATTTATCGGTGGGGGATGGACTCGCGGCCTATCAGTTTGTTGGTGAGGTGATGGCTCACCAAGACGATGACGGGTAGCCGGCCTGAGAGGGCGACCGGCCACACTGGGACTGAGACACGGCCCAGACTCCTACGGGAGGCAGCAGTGGGGAATATTGCACAATGGGCGAAAGCCTGATGCAGCGACGCCGCGTGAGGGATGACGGCCTTCGGGTTGTAAACCTCTTTCAGTAGGGAAGAAGCGAGA…	8-27f 152-1504r
11392	JX454477	Li et al., 2014	scleractinian corals			27–28	Luhuitou fringing reef (18°13′N, 109°28′E)	Tissue slurry homogenates			Actinobacteria	Actinobacteria	Micrococcales	Dermabacteraceae	Brachybacterium	sp.	99	marine agar, yeast extract agar, trehalose proline agar, raffinose histidine agar, pyruvic acid sodium asparagine agar	01-AUG-2012	TGCAGTCGAACGATGACGGCCGTGCTTGCACGGTCTGATTAGTGGCGAACGGGTGAGTAACACGTGAGTAACCTGCCCTCCACTTCGGGATAACCTCGGGAAATCGTGGCTAATACCGGATATGAGCACTCATCGCATGGTGGGTGTTGGAAAGATTTATCGGTGGGGGATGGACTCGCGGCCTATCAGTTTGTTGGTGAGGTGATGGCTCACCAAGACGATGACGGGTAGCCGGCCTGAGAGGGCGACCGGCCACACTGGGACTGAGACACGGCCCAGACTCCTACGGGAGGCAGCAGTGGGGAATATTGCACAATGGGCGAAAGCCTGATGCAGCGACGCCGCGTGAGGGATGACGGCCTTCGGGTTGTAAACCTCTTTCAGTAGGGAAGAAGCGAG…	8-27f 152-1504r
11738	JX454478	Li et al., 2014	scleractinian corals			27–28	Luhuitou fringing reef (18°13′N, 109°28′E)	Tissue slurry homogenates			Actinobacteria	Actinobacteria	Micrococcales	Brevibacteriaceae	Brevibacterium	sp.	100	marine agar, yeast extract agar, trehalose proline agar, raffinose histidine agar, pyruvic acid sodium asparagine agar	01-AUG-2012	TGCAAGTCGAACGCTGAAGCCGACAGCTTGCTGTTGGTGGATGAGTGGCGAACGGGTGAGTAACACGTGAGTAACCTGCCCCTGATTTCGGGATAAGCCTGGGAAACTGGGTCTAATACCGGATATGACCAATCCTTGCATGAGGGTTGGTGGAAAGTTTTTCGATCGGGGATGGGCTCGCGGCCTATCAGCTTGTTGGTGGGGTAATGGCCTACCAAGGCGACGACGGGTAGCCGGCCTGAGAGGGCGACCGGCCACACTGGGACTGAGACACGGCCCAGACTCCTACGGGAGGCAGCAGTGGGGAATATTGCACAATGGGGGAAACCCTGATGCAGCGACGCAGCGTGCGGGATGACGGCCTTCGGGTTGTAAACCGCTTTCAGCAGGGAAGAAGCG…	8-27f 152-1504r
11395	JX454479	Li et al., 2014	scleractinian corals			27–28	Luhuitou fringing reef (18°13′N, 109°28′E)	Tissue slurry homogenates			Actinobacteria	Actinobacteria	Micrococcales	Brevibacteriaceae	Brevibacterium	sp.	97	marine agar, yeast extract agar, trehalose proline agar, raffinose histidine agar, pyruvic acid sodium asparagine agar	01-AUG-2012	TGCAGTCGAACGCTGAAGCCTGGAGCTTGCTTCGGGTGGATGAGTGGCGAACGGGTGAGTAACACGTGAGTAACCTGCCCCTGACTTCGGGATAAGCCTGGGAAACTGGGTCTAATACCGGATATGACCTGCTACCGCATGGTGGTGGGTGGAAAGTTTTTTCGGTTGGGGATGGGCTCGCGGCCTATCAGCTTGATGGTGGGGTAATGGCCTACCATGGCGACGACGGGTAGCCGGCCTGAGAGGGCGACCGGCCACACTGGGACTGAGACACGGCCCAGACTCCTACGGGAGGCAGCAGTGGGGAATATTGCACAATGGGGGAAACCCTGATGCAGCGACGCAGCGTGCGGGATGACGGCCTTCGGGTTGTAAACCGCTTTCAGTAGGGAAGAAGCC…	8-27f 152-1504r
11735	JX454480	Li et al., 2014	scleractinian corals			27–28	Luhuitou fringing reef (18°13′N, 109°28′E)	Tissue slurry homogenates			Actinobacteria	Actinobacteria	Micrococcales	Brevibacteriaceae	Brevibacterium	sp.	97	marine agar, yeast extract agar, trehalose proline agar, raffinose histidine agar, pyruvic acid sodium asparagine agar	01-AUG-2012	TGCAGTCGACGCTGAAGCCTGGAGCTTGCTTCGGGTGGATGAGTGGCGAACGGGTGAGTAACACGTGAGTAACCTGCCCCTGACTTCGGGATAAGCCTGGGAAACTGGGTCTAATACCGGATATGACCTGCTACCGCATGGTGGTGGGTGGAAAGTTTTTTCGGTTGGGGATGGGCTCGCGGCCTATCAGCTTGATGGTGGGGTAATGGCCTACCATGGCGACGACGGGTAGCCGGCCTGAGAGGGCGACCGGCCACACTGGGACTGAGACACGGCCCAGACTCCTACGGGAGGCAGCAGTGGGGAATATTGCACAATGGGGGAAACCCTGATGCAGCGACGCAGCGTGCGGGATGACGGCCTTCGGGTTGTAAACCGCTTTCAGTAGGGAAGAAGCCT…	8-27f 152-1504r
11399	JX454481	Li et al., 2014	scleractinian corals			27–28	Luhuitou fringing reef (18°13′N, 109°28′E)	Tissue slurry homogenates			Actinobacteria	Actinobacteria	Micrococcales	Promicromonosporaceae	Cellulosimicrobium	sp.	99	marine agar, yeast extract agar, trehalose proline agar, raffinose histidine agar, pyruvic acid sodium asparagine agar	01-AUG-2012	TGCAGTCGACGATGATGCCCAGCTTGCTGGGTGGATTAGTGGCGAACGGGTGAGTAACACGTGAGTAACCTGCCCTTGACTTCGGGATAACTCCGGGAAACCGGGGCTAATACCGGATATGAGCCGCCCTCGCATGGGGGTGGTTGGAAAGTTTTTCGGTCAGGGATGGGCTCGCGGCCTATCAGCTTGTTGGTGGGGTGATGGCCTACCAAGGCGACGACGGGTAGCCGGCCTGAGAGGGCGACCGGCCACACTGGGACTGAGACACGGCCCAGACTCCTACGGGAGGCAGCAGTGGGGAATATTGCACAATGGGCGAAAGCCTGATGCAGCGACGCCGCGTGAGGGATGAAGGCCTTCGGGTTGTAAACCTCTTTCAGCAGGGAAGAAGCGCAAGTG…	8-27f 152-1504r
11397	JX454482	Li et al., 2014	scleractinian corals			27–28	Luhuitou fringing reef (18°13′N, 109°28′E)	Tissue slurry homogenates			Actinobacteria	Actinobacteria	Corynebacteriales	Gordoniaceae	Gordonia	sp.	99	marine agar, yeast extract agar, trehalose proline agar, raffinose histidine agar, pyruvic acid sodium asparagine agar	01-AUG-2012	TGCAGTCGACGGAAGGCCCAGCTTGCTGGGTACTCGAGTGGCGAACGGGTGAGTAACACGTGGGTGATCTGCCCTGCACTCTGGGATAAGCCTGGGAAACTGGGTCTAATACCGGATATGACCAACTGTCGCATGGTGGTTGGTGGAAAGCTTTTGCGGTGTGGGATGGGCCCGCGGCCTATCAGCTTGTTGGTGGGGTAATGGCCTACCAAGGCGACGACGGGTAGCCGACCTGAGAGGGTGATCGGCCACACTGGGACTGAGACACGGCCCAGACTCCTACGGGAGGCAGCAGTGGGGAATATTGCACAATGGGCGCAAGCCTGATGCAGCGACGCCGCGTGAGGGATGACGGCCTTCGGGTTGTAAACCTCTTTCACCAGGGACGAAGCGGAAGTG…	8-27f 152-1504r
11535	JX454483	Li et al., 2014	scleractinian corals			27–28	Luhuitou fringing reef (18°13′N, 109°28′E)	Tissue slurry homogenates			Actinobacteria	Actinobacteria	Corynebacteriales	Gordoniaceae	Gordonia	sp.	100	marine agar, yeast extract agar, trehalose proline agar, raffinose histidine agar, pyruvic acid sodium asparagine agar	01-AUG-2012	TGCAGTCGAACGGAAAGGCCCAGCTTGCTGGGTACTCGAGTGGCGAACGGGTGAGTAACACGTGGGTGATCTGCCCTGCACTCTGGGATAAGCCTGGGAAACTGGGTCTAATACCGGATATGACCAACTGTCGCATGGTGGTTGGTGGAAAGCTTTTGCGGTGTGGGATGGGCCCGCGGCCTATCAGCTTGTTGGTGGGGTAATGGCCTACCAAGGCGACGACGGGTAGCCGACCTGAGAGGGTGATCGGCCACACTGGGACTGAGACACGGCCCAGACTCCTACGGGAGGCAGCAGTGGGGAATATTGCACAATGGGCGCAAGCCTGATGCAGCGACGCCGCGTGAGGGATGACGGCCTTCGGGTTGTAAACCTCTTTCACCAGGGACGAAGCGGAAG…	8-27f 152-1504r
11537	JX454484	Li et al., 2014	scleractinian corals			27–28	Luhuitou fringing reef (18°13′N, 109°28′E)	Tissue slurry homogenates			Actinobacteria	Actinobacteria	Corynebacteriales	Gordoniaceae	Gordonia	sp.	99	marine agar, yeast extract agar, trehalose proline agar, raffinose histidine agar, pyruvic acid sodium asparagine agar	01-AUG-2012	TGCAAGTCGACGGAAAGGCCCAGCTTGCTGGGTACTCGAGTGGCGAACGGGTGAGTAACACGTGGGTGATCTGCCCTGCACTCTGGGATAAGCCTGGGAAACTGGGTCTAATACCGGATATGACCAACTGTCGCATGGTGGTTGGTGGAAAGCTTTTGCGGTGTGGGATGGGCCCGCGGCCTATCAGCTTGTTGGTGGGGTAATGGCCTACCAAGGCGACGACGGGTAGCCGACCTGAGAGGGTGATCGGCCACACTGGGACTGAGACACGGCCCAGACTCCTACGGGAGGCAGCAGTGGGGAATATTGCACAATGGGCGCAAGCCTGATGCAGCGACGCCGCGTGAGGGATGACGGCCTTCGGGTTGTAAACCTCTTTCACCAGGGACGAAGCGGAAG…	8-27f 152-1504r
11536	JX454485	Li et al., 2014	scleractinian corals			27–28	Luhuitou fringing reef (18°13′N, 109°28′E)	Tissue slurry homogenates			Actinobacteria	Actinobacteria	Corynebacteriales	Gordoniaceae	Gordonia	sp.	99	marine agar, yeast extract agar, trehalose proline agar, raffinose histidine agar, pyruvic acid sodium asparagine agar	01-AUG-2012	TGCAGTCGACGGAAAGGCCTAGCTTGCTGGGTACTCGAGTGGCGAACGGGTGAGTAACACGTGGGTGATCTGCCCTGAACTCTGGGATAAGCCTGGGAAACTGGGTCTAATACCGGATATGACCTTGGAGTGCATGCTCTGGGGTGGAAAGCTTTTGCGGTTCAGGATGGGCCCGCGGCCTATCAGCTTGTTGGTGGGGTAATGGCCTACCAAGGCGACGACGGGTAGCCGACCTGAGAGGGTGATCGGCCACACTGGGACTGAGACACGGCCCAGACTCCTACGGGAGGCAGCAGTGGGGAATATTGCACAATGGGCGCAAGCCTGATGCAGCGACGCCGCGTGAGGGATGACGGCCTTCGGGTTGTAAACCTCTTTCACCAGGGACGAAGCGTGAGT…	8-27f 152-1504r
11715	JX454486	Li et al., 2014	scleractinian corals			27–28	Luhuitou fringing reef (18°13′N, 109°28′E)	Tissue slurry homogenates			Actinobacteria	Actinobacteria	Micromonosporales	Micromonosporaceae	Micromonospora	sp.	100	marine agar, yeast extract agar, trehalose proline agar, raffinose histidine agar, pyruvic acid sodium asparagine agar	01-AUG-2012	GGCCCTTCGGGGTACTCGAGCGGCGAACGGGTGAGTAACACGTGAGCAACCTGCCCCAGGCTTTGGGATAACCCCGGGAAACCGGGGCTAATACCGAATATGACCTCTGACCGCATGGTTGGTGGTGGAAAGTTTTTCGGCTTGGGATGGGCTCGCGGCCTATCAGCTTGTTGGTGGGGTGATGGCCTACCAAGGCGACGACGGGTAGCCGGCCTGAGAGGGCGACCGGCCACACTGGGACTGAGACACGGCCCAGACTCCTACGGGAGGCAGCAGTGGGGAATATTGCACAATGGGCGGAAGCCTGATGCAGCGACGCCGCGTGAGGGATGACGGCCTTCGGGTTGTAAACCTCTTTCAGCAGGGACGAAGCGTAAGTGACGGTACCTGCAGAAGAAG…	8-27f 152-1504r
11724	JX454487	Li et al., 2014	scleractinian corals			27–28	Luhuitou fringing reef (18°13′N, 109°28′E)	Tissue slurry homogenates			Actinobacteria	Actinobacteria	Micromonosporales	Micromonosporaceae	Micromonospora	sp.	100	marine agar, yeast extract agar, trehalose proline agar, raffinose histidine agar, pyruvic acid sodium asparagine agar	01-AUG-2012	TTCGGGGTACTCGAGCGGCGAACGGGTGAGTAACACGTGAGCAACCTGCCCCAGGCTTTGGGATAACCCCGGGAAACCGGGGCTAATACCGAATATGACCTCTGACCGCATGGTTGGTGGTGGAAAGTTTTTCGGCTTGGGATGGGCTCGCGGCCTATCAGCTTGTTGGTGGGGTGATGGCCTACCAAGGCGACGACGGGTAGCCGGCCTGAGAGGGCGACCGGCCACACTGGGACTGAGACACGGCCCAGACTCCTACGGGAGGCAGCAGTGGGGAATATTGCACAATGGGCGGAAGCCTGATGCAGCGACGCCGCGTGAGGGATGACGGCCTTCGGGTTGTAAACCTCTTTCAGCAGGGACGAAGCGTAAGTGACGGTACCTGCAGAAGAAGCGCCG…	8-27f 152-1504r
11725	JX454488	Li et al., 2014	scleractinian corals			27–28	Luhuitou fringing reef (18°13′N, 109°28′E)	Tissue slurry homogenates			Actinobacteria	Actinobacteria	Micromonosporales	Micromonosporaceae	Micromonospora	sp.	100	marine agar, yeast extract agar, trehalose proline agar, raffinose histidine agar, pyruvic acid sodium asparagine agar	01-AUG-2012	GTCGAGCGGAAGGCCCTTCGGGGTACTCGAGCGGCGAACGGGTGAGTAACACGTGAGCAACCTGCCCCAGGCTTTGGGATAACCCCGGGAAACCGGGGCTAATACCGAATATGACCTCTGACCGCATGGTTGGTGGTGGAAAGTTTTTCGGCTTGGGATGGGCTCGCGGCCTATCAGCTTGTTGGTGGGGTGATGGCCTACCAAGGCGACGACGGGTAGCCGGCCTGAGAGGGCGACCGGCCACACTGGGACTGAGACACGGCCCAGACTCCTACGGGAGGCAGCAGTGGGGAATATTGCACAATGGGCGGAAGCCTGATGCAGCGACGCCGCGTGAGGGATGACGGCCTTCGGGTTGTAAACCTCTTTCAGCAGGGACGAAGCGTAAGTGACGGTACC…	8-27f 152-1504r
11401	JX454489	Li et al., 2014	scleractinian corals			27–28	Luhuitou fringing reef (18°13′N, 109°28′E)	Tissue slurry homogenates			Actinobacteria	Actinobacteria	Corynebacteriales	Mycobacteriaceae	Mycobacterium	sp.	99	marine agar, yeast extract agar, trehalose proline agar, raffinose histidine agar, pyruvic acid sodium asparagine agar	01-AUG-2012	TGCAGTCGACGGAAGGCCCTTCGGGGTACTCGAGTGGCGAACGGGTGAGTAACACGTGGGTGATCTGCCCTGCACTTTGGGATAAGCCTGGGAAACTGGGTCTAATACCGAATAGGACCGCATGCTTCATGGTGTGTGGTGGAAAGCTTTTGCGGTGTGGGATGGGCCCGCGGCCTATCAGCTTGTTGGTGGGGTAATGGCCTACCAAGGCGACGACGGGTAGCCGGCCTGAGAGGGTGACCGGCCACACTGGGACTGAGATACGGCCCAGACTCCTACGGGAGGCAGCAGTGGGGAATATTGCACAATGGGCGCAAGCCTGATGCAGCGACGCCGCGTGAGGGATGACGGCCTTCGGGTTGTAAACCTCTTTCGCCAGGGACGAAGCGCAAGTGACGG…	8-27f 152-1504r
11538	JX454490	Li et al., 2014	scleractinian corals			27–28	Luhuitou fringing reef (18°13′N, 109°28′E)	Tissue slurry homogenates			Actinobacteria	Actinobacteria	Corynebacteriales	Mycobacteriaceae	Mycobacterium	sp.	99	marine agar, yeast extract agar, trehalose proline agar, raffinose histidine agar, pyruvic acid sodium asparagine agar	01-AUG-2012	TGCAGTCGAACGGAAAGGCCCTTCGGGGTACTCGAGTGGCGAACGGGTGAGTAACACGTGGGTGATCTGCCCTGCACTTTGGGATAAGCCTGGGAAACTGGGTCTAATACCGAATACACCCTTCTGGCTGCATGGTCTGGGAGGGGAAAGCTTTTGCGGTGTGGGATGGGCCCGCGGCCTATCAGCTTGTTGGTGAGGTTACGGCTCACCAAGGCGACGACGGGTAGCCGGCCTGAGAGGGTGACCGGCCACACTGGGACTGAGATACGGCCCAGACTCCTACGGGAGGCAGCAGTGGGGAATATTGCACAATGGGCGCAAGCCTGATGCAGCGACGCCGCGTGAGGGATGACGGCCTTCGGGTTGTAAACCTCTTTCGCCAGGGACGAAGCGCAAGTG…	8-27f 152-1504r
11462	JX454491	Li et al., 2014	scleractinian corals			27–28	Luhuitou fringing reef (18°13′N, 109°28′E)	Tissue slurry homogenates			Actinobacteria	Actinobacteria	Streptosporangiales	Nocardiopsaceae	Nocardiopsis	sp.	100	marine agar, yeast extract agar, trehalose proline agar, raffinose histidine agar, pyruvic acid sodium asparagine agar	01-AUG-2012	GTCGAGCGGTAAGGCCCTTCGGGGTACACGAGCGGCGAACGGGTGAGTAACACGTGAGCAACCTGCCCCTGACTCCGGGATAAGCGGTGGAAACGCCGTCTAATACCGGATACGACCCTCCACCTCATGGTGGTGGGTGGAAAGTTTTTCGGTCGGGGATGGGCTCGCGGCCTATCAGCTTGTTGGTGGGGTAACGGCCTACCAAGGCGATTACGGGTAGCCGGCCTGAGAGGGCGACCGGCCACACTGGGACTGAGACACGGCCCAGACTCCTGCGGGAGGCAGCAGTGGGGAATATTGCGCAATGGGCGAAAGCCTGACGCAGCGACGCCGCGTGGGGGATGACGGCCTTCGGGTTGTAAACCTCTTTTACCACTCACGCAGGCTCCACGTTTTCGT…	8-27f 152-1504r
11716	JX454492	Li et al., 2014	scleractinian corals			27–28	Luhuitou fringing reef (18°13′N, 109°28′E)	Tissue slurry homogenates			Actinobacteria	Actinobacteria	Streptosporangiales	Nocardiopsaceae	Nocardiopsis	sp.	100	marine agar, yeast extract agar, trehalose proline agar, raffinose histidine agar, pyruvic acid sodium asparagine agar	01-AUG-2012	TGCAGTCGAGCGGTAAGGCCCTTCGGGGTACACGAGCGGCGAACGGGTGAGTAACACGTGAGCAACCTGCCCCTGACTCCGGGATAAGCGGTGGAAACGCCGTCTAATACCGGATACGACCCTCCTCCGCATGGTGGGGGGTGGAAAGTTTTTTCGGTCGGGGATGGGCTCGCGGCCTATCAGCTTGTTGGTGGGGTAACGGCCTACCAAGGCGATTACGGGTAGCCGGCCTGAGAGGGCGACCGGCCACACTGGGACTGAGACACGGCCCAGACTCCTGCGGGAGGCAGCAGTGGGGAATATTGCGCAATGGGCGAAAGCCTGACGCAGCGACGCCGCGTGGGGGATGACGGCCTTCGGGTTGTAAACCTCTTTTACCACTCACGCAGGCCCCACGTT…	8-27f 152-1504r
11720	JX454493	Li et al., 2014	scleractinian corals			27–28	Luhuitou fringing reef (18°13′N, 109°28′E)	Tissue slurry homogenates			Actinobacteria	Actinobacteria	Streptomycetales	Streptomycetaceae	Streptomyces	sp.	100	marine agar, yeast extract agar, trehalose proline agar, raffinose histidine agar, pyruvic acid sodium asparagine agar	01-AUG-2012	TGCAGTCGAACGATGAAGCCCTTCGGGGTGGATTAGTGGCGAACGGGTGAGTAACACGTGGGCAATCTGCCCTGCACTCTGGGACAAGCCCTGGAAACGGGGTCTAATACCGGATATGACCGTCCATCGCATGGTGGATGGTGTAAAGCTCCGGCGGTGCAGGATGAGCCCGCGGCCTATCAGCTAGTTGGTGAGGTAGTGGCTCACCAAGGCGACGACGGGTAGCCGGCCTGAGAGGGCGACCGGCCACACTGGGACTGAGACACGGCCCAGACTCCTACGGGAGGCAGCAGTGGGGAATATTGCACAATGGGCGAAAGCCTGATGCAGCGACGCCGCGTGAGGGATGACGGCCTTCGGGTTGTAAACCTCTTTCAGCAGGGAAGAAGCGAAAGTGAC…	8-27f 152-1504r
11719	JX454494	Li et al., 2014	scleractinian corals			27–28	Luhuitou fringing reef (18°13′N, 109°28′E)	Tissue slurry homogenates			Actinobacteria	Actinobacteria	Streptomycetales	Streptomycetaceae	Streptomyces	sp.	100	marine agar, yeast extract agar, trehalose proline agar, raffinose histidine agar, pyruvic acid sodium asparagine agar	01-AUG-2012	TGCAGTCGAACGATGAACCTCCTTCGGGAGGGGATTAGTGGCGAACGGGTGAGTAACACGTGGGCAATCTGCCCTGCACTCTGGGACAAGCCCTGGAAACGGGGTCTAATACCGGATACTGACCCGCTTGGGCATCCAAGCGGTTCGAAAGCTCCGGCGGTGCAGGATGAGCCCGCGGCCTATCAGCTTGTTGGTGAGGTAATGGCTCACCAAGGCGACGACGGGTAGCCGGCCTGAGAGGGCGACCGGCCACACTGGGACTGAGACACGGCCCAGACTCCTACGGGAGGCAGCAGTGGGGAATATTGCACAATGGGCGAAAGCCTGATGCAGCGACGCCGCGTGAGGGATGACGGCCTTCGGGTTGTAAACCTCTTTCAGCAGGGAAGAAGCGAAAGT…	8-27f 152-1504r
11469	JX454495	Li et al., 2014	scleractinian corals			27–28	Luhuitou fringing reef (18°13′N, 109°28′E)	Tissue slurry homogenates			Actinobacteria	Actinobacteria	Streptomycetales	Streptomycetaceae	Streptomyces	sp.	100	marine agar, yeast extract agar, trehalose proline agar, raffinose histidine agar, pyruvic acid sodium asparagine agar	01-AUG-2012	TGCAGTCGACGATGAAGCCCTTCGGGGTGGATTAGTGGCGAACGGGTGAGTAACACGTGGGCAATCTGCCCTGCACTCTGGGACAAGCCCTGGAAACGGGGTCTAATACCGGATATGACCGTCCATCGCATGGTGGATGGTGTAAAGCTCCGGCGGTGCAGGATGAGCCCGCGGCCTATCAGCTAGTTGGTGAGGTAGTGGCTCACCAAGGCGACGACGGGTAGCCGGCCTGAGAGGGCGACCGGCCACACTGGGACTGAGACACGGCCCAGACTCCTACGGGAGGCAGCAGTGGGGAATATTGCACAATGGGCGAAAGCCTGATGCAGCGACGCCGCGTGAGGGATGACGGCCTTCGGGTTGTAAACCTCTTTCAGCAGGGAAGAAGCGAAAGTGACG…	8-27f 152-1504r
11704	JX454496	Li et al., 2014	scleractinian corals			27–28	Luhuitou fringing reef (18°13′N, 109°28′E)	Tissue slurry homogenates			Actinobacteria	Actinobacteria	Streptosporangiales	Nocardiopsaceae	Nocardiopsis	sp.	100	marine agar, yeast extract agar, trehalose proline agar, raffinose histidine agar, pyruvic acid sodium asparagine agar	01-AUG-2012	TGCAGTCGAGCGGTAAGGCCCTTCGGGGTACACGAGCGGCGAACGGGTGAGTAACACGTGAGCAACCTGCCCCTGACTCCGGGATAAGCGGTGGAAACGCCGTCTAATACCGGATACGACCCTCCACCTCATGGTGGTGGGTGGAAAGTTTTTCGGTCGGGGATGGGCTCGCGGCCTATCAGCTTGTTGGTGGGGTAACGGCCTACCAAGGCGATTACGGGTAGCCGGCCTGAGAGGGCGACCGGCCACACTGGGACTGAGACACGGCCCAGACTCCTGCGGGAGGCAGCAGTGGGGAATATTGCGCAATGGGCGAAAGCCTGACGCAGCGACGCCGCGTGGGGGATGACGGCCTTCGGGTTGTAAACCTCTTTTACCACTCACGCAGGCTCCACGTTT…	8-27f 152-1504r
11717	JX454497	Li et al., 2014	scleractinian corals			27–28	Luhuitou fringing reef (18°13′N, 109°28′E)	Tissue slurry homogenates			Actinobacteria	Actinobacteria	Streptomycetales	Streptomycetaceae	Streptomyces	sp.	100	marine agar, yeast extract agar, trehalose proline agar, raffinose histidine agar, pyruvic acid sodium asparagine agar	01-AUG-2012	TGCAGTCGACGATGAACCACTTCGGTGGGGATTAGTGGCGAACGGGTGAGTAACACGTGGGCAATCTGCCCTGCACTCTGGGACAAGCCCTGGAAACGGGGTCTAATACCGGATACTGACCCGCTTGGGCATCCAAGCGGTTCGAAAGCTCCGGCGGTGCAGGATGAGCCCGCGGCCTATCAGCTTGTTGGTGAGGTAATGGCTCACCAAGGCGACGACGGGTAGCCGGCCTGAGAGGGCGACCGGCCACACTGGGACTGAGACACGGCCCAGACTCCTACGGGAGGCAGCAGTGGGGAATATTGCACAATGGGCGAAAGCCTGATGCAGCGACGCCGCGTGAGGGATGACGGCCTTCGGGTTGTAAACCTCTTTCAGCAGGGAAGAAGCGAAAGTGAC…	8-27f 152-1504r
11479	JX454498	Li et al., 2014	scleractinian corals			27–28	Luhuitou fringing reef (18°13′N, 109°28′E)	Tissue slurry homogenates			Actinobacteria	Actinobacteria	Streptomycetales	Streptomycetaceae	Streptomyces	sp.	100	marine agar, yeast extract agar, trehalose proline agar, raffinose histidine agar, pyruvic acid sodium asparagine agar	01-AUG-2012	TGCAGTCGACGATGAACCACTTCGGTGGGGATTAGTGGCGAACGGGTGAGTAACACGTGGGCAATCTGCCCTGCACTCTGGGACAAGCCCTGGAAACGGGGTCTAATACCGGATACTGACCCGCTTGGGCATCCAAGCGGTTCGAAAGCTCCGGCGGTGCAGGATGAGCCCGCGGCCTATCAGCTTGTTGGTGAGGTAATGGCTCACCAAGGCGACGACGGGTAGCCGGCCTGAGAGGGCGACCGGCCACACTGGGACTGAGACACGGCCCAGACTCCTACGGGAGGCAGCAGTGGGGAATATTGCACAATGGGCGAAAGCCTGATGCAGCGACGCCGCGTGAGGGATGACGGCCTTCGGGTTGTAAACCTCTTTCAGCAGGGAAGAAGCGAAAGTGAC…	8-27f 152-1504r
11542	JX454499	Li et al., 2014	scleractinian corals			27–28	Luhuitou fringing reef (18°13′N, 109°28′E)	Tissue slurry homogenates			Actinobacteria	Actinobacteria	Corynebacteriales	Mycobacteriaceae	Mycobacterium	sp.	99	marine agar, yeast extract agar, trehalose proline agar, raffinose histidine agar, pyruvic acid sodium asparagine agar	01-AUG-2012	TGCAAGTCGAACGGAAAGGCCCTTTCGGGGGTACTCGAGTGGCGAACGGGTGAGTAACACGTGGGTGATCTGCCCTGCACTTTGGGATAAGCCTGGGAAACTGGGTCTAATACCGAATATGATCATCGGCTTCATGGTCGGTGGTGGAAAGCTTTTGCGGTGTGGGATGGGCCCGCGGCCTATCAGCTTGTTGGTGGGGTAATGGCCTACCAAGGCGACGACGGGTAGCCGGCCTGAGAGGGTGTCCGGCCACACTGGGACTGAGATACGGCCCAGACTCCTACGGGAGGCAGCAGTGGGGAATATTGCACAATGGGCGCAAGCCTGATGCAGCGACGCCGCGTGAGGGATGACGGCCTTCGGGTTGTAAACCTCTTTCGCCAGGGACGAAGCGCAAGT…	8-27f 152-1504r
11336	JX454500	Li et al., 2014	scleractinian corals			27–28	Luhuitou fringing reef (18°13′N, 109°28′E)	Tissue slurry homogenates			Actinobacteria	Actinobacteria	Micrococcales	Brevibacteriaceae	Brevibacterium	sp.	100	marine agar, yeast extract agar, trehalose proline agar, raffinose histidine agar, pyruvic acid sodium asparagine agar	01-AUG-2012	TGCAGTCGAACGCTGAAGCCGACAGCTTGCTGTTGGTGGATGAGTGGCGAACGGGTGAGTAACACGTGAGTAACCTGCCCCTGATTTCGGGATAAGCCTGGGAAACTGGGTCTAATACCGGATATGACCAATCCTTGCATGAGGGTTGGTGGAAAGTTTTTCGATCGGGGATGGGCTCGCGGCCTATCAGCTTGTTGGTGGGGTAATGGCCTACCAAGGCGACGACGGGTAGCCGGCCTGAGAGGGCGACCGGCCACACTGGGACTGAGACACGGCCCAGACTCCTACGGGAGGCAGCAGTGGGGAATATTGCACAATGGGGGAAACCCTGATGCAGCGACGCAGCGTGCGGGATGACGGCCTTCGGGTTGTAAACCGCTTTCAGCAGGGAAGAAGCGA…	8-27f 152-1504r
11360	JX454501	Li et al., 2014	scleractinian corals			27–28	Luhuitou fringing reef (18°13′N, 109°28′E)	Tissue slurry homogenates			Actinobacteria	Actinobacteria	Micrococcales	Brevibacteriaceae	Brevibacterium	sp.	100	marine agar, yeast extract agar, trehalose proline agar, raffinose histidine agar, pyruvic acid sodium asparagine agar	01-AUG-2012	TGCAGTCGAACGCTGAAGCCGACAGCTTGCTGTTGGTGGATGAGTGGCGAACGGGTGAGTAACACGTGAGTAACCTGCCCCTGATTTCGGGATAAGCCTGGGAAACTGGGTCTAATACCGGATATGACCAATCCTTGCATGAGGGTTGGTGGAAAGTTTTTCGATCGGGGATGGGCTCGCGGCCTATCAGCTTGTTGGTGGGGTAATGGCCTACCAAGGCGACGACGGGTAGCCGGCCTGAGAGGGCGACCGGCCACACTGGGACTGAGACACGGCCCAGACTCCTACGGGAGGCAGCAGTGGGGAATATTGCACAATGGGGGAAACCCTGATGCAGCGACGCAGCGTGCGGGATGACGGCCTTCGGGTTGTAAACCGCTTTCAGCAGGGAAGAAGCGA…	8-27f 152-1504r
11357	JX454502	Li et al., 2014	scleractinian corals			27–28	Luhuitou fringing reef (18°13′N, 109°28′E)	Tissue slurry homogenates			Actinobacteria	Actinobacteria	Micrococcales	Promicromonosporaceae	Cellulosimicrobium	sp.	100	marine agar, yeast extract agar, trehalose proline agar, raffinose histidine agar, pyruvic acid sodium asparagine agar	01-AUG-2012	CGATGATGCCCAGCTTGCTGGGCGGATTAGTGGCGAACGGGTGAGTAACACGTGAGTAACCTGCCCTTGACTTCGGGATAACTCCGGGAAACCGGGGCTAATACCGGATATGAGCCGTCCTCGCATGGGGGTGGTTGGAAAGTTTTTCGGTCAGGGATGGGCTCGCGGCCTATCAGCTTGTTGGTGGGGTGATGGCCTACCAAGGCGACGACGGGTAGCCGGCCTGAGAGGGCGACCGGCCACACTGGGACTGAGACACGGCCCAGACTCCTACGGGAGGCAGCAGTGGGGAATATTGCACAATGGGCGAAAGCCTGATGCAGCGACGCCGCGTGAGGGATGAAGGCCTTCGGGTTGTAAACCTCTTTCAGCAGGGAAGAAGCGCAAGTGACGGTACCT…	8-27f 152-1504r
11356	JX454503	Li et al., 2014	scleractinian corals			27–28	Luhuitou fringing reef (18°13′N, 109°28′E)	Tissue slurry homogenates			Actinobacteria	Actinobacteria	Micrococcales	Promicromonosporaceae	Cellulosimicrobium	sp.	100	marine agar, yeast extract agar, trehalose proline agar, raffinose histidine agar, pyruvic acid sodium asparagine agar	01-AUG-2012	TGCAGTCGAACGATGATGCCCAGCTTGCTGGGCGGATTAGTGGCGAACGGGTGAGTAACACGTGAGTAACCTGCCCTTGACTTCGGGATAACTCCGGGAAACCGGGGCTAATACCGGATATGAGCCGTCCTCGCATGGGGGTGGTTGGAAAGTTTTTCGGTCAGGGATGGGCTCGCGGCCTATCAGCTTGTTGGTGGGGTGATGGCCTACCAAGGCGACGACGGGTAGCCGGCCTGAGAGGGCGACCGGCCACACTGGGACTGAGACACGGCCCAGACTCCTACGGGAGGCAGCAGTGGGGAATATTGCACAATGGGCGAAAGCCTGATGCAGCGACGCCGCGTGAGGGATGAAGGCCTTCGGGTTGTAAACCTCTTTCAGCAGGGAAGAAGCGCAAGT…	8-27f 152-1504r
11384	JX454504	Li et al., 2014	scleractinian corals			27–28	Luhuitou fringing reef (18°13′N, 109°28′E)	Tissue slurry homogenates			Actinobacteria	Actinobacteria	Corynebacteriales	Gordoniaceae	Gordonia	sp.	100	marine agar, yeast extract agar, trehalose proline agar, raffinose histidine agar, pyruvic acid sodium asparagine agar	01-AUG-2012	TGCAGTCGAACGGAAGGCCCAGCTTGCTGGGTACTCGAGTGGCGAACGGGTGAGTAACACGTGGGTGATCTGCCCTGCACTCTGGGATAAGCCTGGGAAACTGGGTCTAATACCGGATATGACCAACTGTCGCATGGTGGTTGGTGGAAAGCTTTTGCGGTGTGGGATGGGCCCGCGGCCTATCAGCTTGTTGGTGGGGTAATGGCCTACCAAGGCGACGACGGGTAGCCGACCTGAGAGGGTGATCGGCCACACTGGGACTGAGACACGGCCCAGACTCCTACGGGAGGCAGCAGTGGGGAATATTGCACAATGGGCGCAAGCCTGATGCAGCGACGCCGCGTGAGGGATGACGGCCTTCGGGTTGTAAACCTCTTTCACCAGGGACGAAGCGTGAGT…	8-27f 152-1504r
11438	JX454505	Li et al., 2014	scleractinian corals			27–28	Luhuitou fringing reef (18°13′N, 109°28′E)	Tissue slurry homogenates			Actinobacteria	Actinobacteria	Jiangellales	Jiangellaceae	Jiangella	sp.	99	marine agar, yeast extract agar, trehalose proline agar, raffinose histidine agar, pyruvic acid sodium asparagine agar	01-AUG-2012	GTCGAGCGGAAGGCCCTTTCGGGGGTACTCGAGCGGCGAACGGGTGAGTAACACGTGGGTAACCTGCCTTCAGCTCTGGGATAAGCCCGGGAAACTGGGTCTAATACCGGATATGACGCATCACCGCATGGTGTGTGTGTGGAAAGTTTTTCGGCTGAAGATGGACTCGCGGCCTATCAGCTTGTTGGTGGGGTAATGGCCTACCAAGGCGATGACGGGTAGCCGGCCTGAGAGGGCGACCGGCCACACTGGGACTGAGACACGGCCCAGACTCCTACGGGAGGCAGCAGTGGGGAATATTGCGCAATGGGCGAAAGCCTGACGCAGCAACGCCGCGTGAGGGATGACGGCCTTCGGGTTGTAAACCTCTTTCAGCGCTGACGAAGCTTTCGGGTGACG…	8-27f 152-1504r
11386	JX454506	Li et al., 2014	scleractinian corals			27–28	Luhuitou fringing reef (18°13′N, 109°28′E)	Tissue slurry homogenates			Actinobacteria	Actinobacteria	Micrococcales	Micrococcaceae	Microbacterium	sp.	99	marine agar, yeast extract agar, trehalose proline agar, raffinose histidine agar, pyruvic acid sodium asparagine agar	01-AUG-2012	TGCAAGTCGACGGTGAAGAGAGCTTGCTCTCTGGATCAGTGGCGAACGGGTGAGTAACACGTGAGCAACCTGCCCCGGACTCTGGGATAACAGCTGGAAACAGCTGCTAATACCGGATACGAGCTGCGAAGGCATCTTCAGCAGCTGGAAAGAATTTCGGTCCGGGATGGGCTCGCGGCCTATCAGCTAGTTGGTGAGGTAATGGCTCACCAAGGCGTCGACGGGTAGCCGGCCTGAGAGGGTGACCGGCCACACTGGGACTGAGACACGGCCCAGACTCCTACGGGAGGCAGCAGTGGGGAATATTGCACAATGGGCGAAAGCCTGATGCAGCAACGCCGCGTGAGGGATGACGGCCTTCGGGTTGTAAACCTCTTTTAGCAGGGAAGAAGCGAAAGT…	8-27f 152-1504r
11358	JX454507	Li et al., 2014	scleractinian corals			27–28	Luhuitou fringing reef (18°13′N, 109°28′E)	Tissue slurry homogenates			Actinobacteria	Actinobacteria	Micrococcales	Micrococcaceae	Microbacterium	sp.	100	marine agar, yeast extract agar, trehalose proline agar, raffinose histidine agar, pyruvic acid sodium asparagine agar	01-AUG-2012	GAGAGCTTGCTCTCTGGATCAGTGGCGAACGGGTGAGTAACACGTGAGCAACCTGCCCCGGACTCTGGGATAACAGCTGGAAACAGCTGCTAATACCGGATACGAGCTGCGAAGGCATCTTCAGCAGCTGGAAAGAATTTCGGTCCGGGATGGGCTCGCGGCCTATCAGCTAGTTGGTGAGGTAATGGCTCACCAAGGCGTCGACGGGTAGCCGGCCTGAGAGGGTGACCGGCCACACTGGGACTGAGACACGGCCCAGACTCCTACGGGAGGCAGCAGTGGGGAATATTGCACAATGGGCGAAAGCCTGATGCAGCAACGCCGCGTGAGGGATGACGGCCTTCGGGTTGTAAACCTCTTTTAGCAGGGAAGAAGCGAAAGTGACGGTACCTGCAGAAA…	8-27f 152-1504r
11359	JX454508	Li et al., 2014	scleractinian corals			27–28	Luhuitou fringing reef (18°13′N, 109°28′E)	Tissue slurry homogenates			Actinobacteria	Actinobacteria	Micrococcales	Micrococcaceae	Microbacterium	sp.	100	marine agar, yeast extract agar, trehalose proline agar, raffinose histidine agar, pyruvic acid sodium asparagine agar	01-AUG-2012	CGGTGAACACGGAGCTTGCTCTGTGGGATCAGTGGCGAACGGGTGAGTAACACGTGAGCAACCTGCCCCTGACTCTGGGATAAGCGCTGGAAACGGCGTCTAATACTGGATATGTGACGTGACCGCATGGTCTGCGTTTGGAAAGATTTTTCGGTTGGGGATGGGCTCGCGGCCTATCAGCTTGTTGGTGAGGTAATGGCTCACCAAGGCGTCGACGGGTAGCCGGCCTGAGAGGGTGACCGGCCACACTGGGACTGAGACACGGCCCAGACTCCTACGGGAGGCAGCAGTGGGGAATATTGCACAATGGGCGAAAGCCTGATGCAGCAACGCCGCGTGAGGGATGACGGCCTTCGGGTTGTAAACCTCTTTTAGCAGGGAAGAAGCGAAAGTGACGGT…	8-27f 152-1504r
11439	JX454509	Li et al., 2014	scleractinian corals			27–28	Luhuitou fringing reef (18°13′N, 109°28′E)	Tissue slurry homogenates			Actinobacteria	Actinobacteria	Micromonosporales	Micromonosporaceae	Micromonospora	sp.	100	marine agar, yeast extract agar, trehalose proline agar, raffinose histidine agar, pyruvic acid sodium asparagine agar	01-AUG-2012	TGCAAGTCGAGCGGAAGGCCCTTCGGGGTACTCGAGCGGCGAACGGGTGAGTAACACGTGAGCAACCTGCCCCAGGCTTTGGGATAACCCCGGGAAACCGGGGCTAATACCGAATATGACCTCTGACCGCATGGTTGGTGGTGGAAAGTTTTTCGGCTTGGGATGGGCTCGCGGCCTATCAGCTTGTTGGTGGGGTGATGGCCTACCAAGGCGACGACGGGTAGCCGGCCTGAGAGGGCGACCGGCCACACTGGGACTGAGACACGGCCCAGACTCCTACGGGAGGCAGCAGTGGGGAATATTGCACAATGGGCGGAAGCCTGATGCAGCGACGCCGCGTGAGGGATGACGGCCTTCGGGTTGTAAACCTCTTTCAGCAGGGACGAAGCGTAAGTGACG…	8-27f 152-1504r
11440	JX454510	Li et al., 2014	scleractinian corals			27–28	Luhuitou fringing reef (18°13′N, 109°28′E)	Tissue slurry homogenates			Actinobacteria	Actinobacteria	Micromonosporales	Micromonosporaceae	Micromonospora	sp.	100	marine agar, yeast extract agar, trehalose proline agar, raffinose histidine agar, pyruvic acid sodium asparagine agar	01-AUG-2012	TGCAGTCGAGCGGAAGGCCCTTCGGGGTACTCGAGCGGCGAACGGGTGAGTAACACGTGAGCAACCTGCCCCAGGCTTTGGGATAACCCCGGGAAACCGGGGCTAATACCGAATATGACCTCTGACCGCATGGTTGGTGGTGGAAAGTTTTTCGGCTTGGGATGGGCTCGCGGCCTATCAGCTTGTTGGTGGGGTGATGGCCTACCAAGGCGACGACGGGTAGCCGGCCTGAGAGGGCGACCGGCCACACTGGGACTGAGACACGGCCCAGACTCCTACGGGAGGCAGCAGTGGGGAATATTGCACAATGGGCGGAAGCCTGATGCAGCGACGCCGCGTGAGGGATGACGGCCTTCGGGTTGTAAACCTCTTTCAGCAGGGACGAAGCGTAAGTGACGG…	8-27f 152-1504r
11493	JX454511	Li et al., 2014	scleractinian corals			27–28	Luhuitou fringing reef (18°13′N, 109°28′E)	Tissue slurry homogenates			Actinobacteria	Actinobacteria	Micromonosporales	Micromonosporaceae	Micromonospora	sp.	100	marine agar, yeast extract agar, trehalose proline agar, raffinose histidine agar, pyruvic acid sodium asparagine agar	01-AUG-2012	TGCAGTCGAGCGGAAGGCCCTTCGGGGTACTCGAGCGGCGAACGGGTGAGTAACACGTGAGCAACCTGCCCCAGGCTTTGGGATAACCCCGGGAAACCGGGGCTAATACCGAATATGACCTCTGACCGCATGGTTGGTGGTGGAAAGTTTTTCGGCTTGGGATGGGCTCGCGGCCTATCAGCTTGTTGGTGGGGTGATGGCCTACCAAGGCGACGACGGGTAGCCGGCCTGAGAGGGCGACCGGCCACACTGGGACTGAGACACGGCCCAGACTCCTACGGGAGGCAGCAGTGGGGAATATTGCACAATGGGCGGAAGCCTGATGCAGCGACGCCGCGTGAGGGATGACGGCCTTCGGGTTGTAAACCTCTTTCAGCAGGGACGAAGCGTAAGTGACGG…	8-27f 152-1504r
11492	JX454512	Li et al., 2014	scleractinian corals			27–28	Luhuitou fringing reef (18°13′N, 109°28′E)	Tissue slurry homogenates			Actinobacteria	Actinobacteria	Streptosporangiales	Nocardiopsaceae	Nocardiopsis	sp.	100	marine agar, yeast extract agar, trehalose proline agar, raffinose histidine agar, pyruvic acid sodium asparagine agar	01-AUG-2012	TGCAGTCGAGCGGTAAGGCCCTTCGGGGTACACGAGCGGCGAACGGGTGAGTAACACGTGAGCAACCTGCCCCTGACTCCGGGATAAGCGGTGGAAACGCCGTCTAATACCGGATACGACCCTCCACCTCATGGTGGTGGGTGGAAAGTTTTTCGGTCGGGGATGGGCTCGCGGCCTATCAGCTTGTTGGTGGGGTAACGGCCTACCAAGGCGATTACGGGTAGCCGGCCTGAGAGGGCGACCGGCCACACTGGGACTGAGACACGGCCCAGACTCCTGCGGGAGGCAGCAGTGGGGAATATTGCGCAATGGGCGAAAGCCTGACGCAGCGACGCCGCGTGGGGGATGACGGCCTTCGGGTTGTAAACCTCTTTTACCACTCACGCAGGCTCCACGTTT…	8-27f 152-1504r
11753	JX454513	Li et al., 2014	scleractinian corals			27–28	Luhuitou fringing reef (18°13′N, 109°28′E)	Tissue slurry homogenates			Actinobacteria	Actinobacteria	Streptosporangiales	Nocardiopsaceae	Nocardiopsis	sp.	100	marine agar, yeast extract agar, trehalose proline agar, raffinose histidine agar, pyruvic acid sodium asparagine agar	01-AUG-2012	TGCAAGTCGAGCGGTAAGGCCCTTCGGGGTACACGAGCGGCGAACGGGTGAGTAACACGTGAGCAACCTGCCCCTGACTCCGGGATAAGCGGTGGAAACGCCGTCTAATACCGGATACGACCCTCCACCTCATGGTGGTGGGTGGAAAGTTTTTCGGTCGGGGATGGGCTCGCGGCCTATCAGCTTGTTGGTGGGGTAACGGCCTACCAAGGCGATTACGGGTAGCCGGCCTGAGAGGGCGACCGGCCACACTGGGACTGAGACACGGCCCAGACTCCTGCGGGAGGCAGCAGTGGGGAATATTGCGCAATGGGCGAAAGCCTGACGCAGCGACGCCGCGTGGGGGATGACGGCCTTCGGGTTGTAAACCTCTTTTACCACTCACGCAGGCTCCACGTT…	8-27f 152-1504r
11437	JX454514	Li et al., 2014	scleractinian corals			27–28	Luhuitou fringing reef (18°13′N, 109°28′E)	Tissue slurry homogenates			Actinobacteria	Actinobacteria	Streptosporangiales	Nocardiopsaceae	Nocardiopsis	sp.	100	marine agar, yeast extract agar, trehalose proline agar, raffinose histidine agar, pyruvic acid sodium asparagine agar	01-AUG-2012	TGCAAGTCGAGCGGTAAGGCCCTTCGGGGTACACGAGCGGCGAACGGGTGAGTAACACGTGAGCAACCTGCCCCTGACTCCGGGATAAGCGGTGGAAACGCCGTCTAATACCGGATACGACCCTCCTCCGCATGGTGGGGGGTGGAAAGTTTTTTCGGTCGGGGATGGGCTCGCGGCCTATCAGCTTGTTGGTGGGGTAACGGCCTACCAAGGCGATTACGGGTAGCCGGCCTGAGAGGGCGACCGGCCACACTGGGACTGAGACACGGCCCAGACTCCTGCGGGAGGCAGCAGTGGGGAATATTGCGCAATGGGCGAAAGCCTGACGCAGCGACGCCGCGTGGGGGATGACGGCCTTCGGGTTGTAAACCTCTTTTACCACTCACGCAGGCCCCACGT…	8-27f 152-1504r
11390	JX454515	Li et al., 2014	scleractinian corals			27–28	Luhuitou fringing reef (18°13′N, 109°28′E)	Tissue slurry homogenates			Actinobacteria	Actinobacteria	Pseudonocardiales	Pseudonocardiaceae	Pseudonocardia	sp.	100	marine agar, yeast extract agar, trehalose proline agar, raffinose histidine agar, pyruvic acid sodium asparagine agar	01-AUG-2012	TGCAGTCGAGCGGTAAGGCCCTTTCGGGGGTACACGAGCGGCGAACGGGTGAGTAACACGTGGGTGACCTGCCCTCCACTCTGGGATAAGCCCGGGAAACTGGGTCTAATACCGGATAGGACCACTGGATGCATGTCTGGTGGTGGAAAGTTTTTTCGGTGGGGGATGGGCCCGCGGCCTATCAGCTTGTTGGTGGGGTGATGGCCTACCAAGGCGGTGACGGGTAGCCGGCCTGAGAGGGCGACCGGCCACACTGGGACTGAGACACGGCCCAGACTCCTACGGGAGGCAGCAGTGGGGAATATTGCGCAATGGGCGGAAGCCTGACGCAGCGACGCCGCGTGGGGGATGACGGCCTTCGGGTTGTAAACCTCTTTCGCCAGGGACGAAGCTAACGTG…	8-27f 152-1504r
11391	JX454516	Li et al., 2014	scleractinian corals			27–28	Luhuitou fringing reef (18°13′N, 109°28′E)	Tissue slurry homogenates			Actinobacteria	Actinobacteria	Pseudonocardiales	Pseudonocardiaceae	Pseudonocardia	sp.	100	marine agar, yeast extract agar, trehalose proline agar, raffinose histidine agar, pyruvic acid sodium asparagine agar	01-AUG-2012	TGCAGTCGAGCGGTAAGGCCCTTTCGGGGGTACACGAGCGGCGAACGGGTGAGTAACACGTGGGTGACCTGCCCTCCACTCTGGGATAAGCCCGGGAAACTGGGTCTAATACCGGATAGGACCACTGATCGCATGGTTGGTGGTGGAAAGTTTTTTCGGTGGGGGATGGGCCCGCGGCCTATCAGCTTGTTGGTGGGGTGATGGCCTACCAAGGCGGTGACGGGTAGCCGGCCTGAGAGGGCGACCGGCCACACTGGGACTGAGACACGGCCCAGACTCCTACGGGAGGCAGCAGTGGGGAATATTGCGCAATGGGCGGAAGCCTGACGCAGCGACGCCGCGTGGGGGATGACGGCCTTCGGGTTGTAAACCTCTTTCGCCAGGGACGAAGAGCAATTG…	8-27f 152-1504r
11482	JX454517	Li et al., 2014	scleractinian corals			27–28	Luhuitou fringing reef (18°13′N, 109°28′E)	Tissue slurry homogenates			Actinobacteria	Actinobacteria	Pseudonocardiales	Pseudonocardiaceae	Pseudonocardia	sp.	100	marine agar, yeast extract agar, trehalose proline agar, raffinose histidine agar, pyruvic acid sodium asparagine agar	01-AUG-2012	TTTCGGGGGTACACGAGCGGCGAACGGGTGAGTAACACGTGGGTGACCTGCCCTCCACTCTGGGATAAGCCCGGGAAACTGGGTCTAATACCGGATAGGACCACTGATCGCATGGTTGGTGGTGGAAAGTTTTTTCGGTGGGGGATGGGCCCGCGGCCTATCAGCTTGTTGGTGGGGTGATGGCCTACCAAGGCGGTGACGGGTAGCCGGCCTGAGAGGGCGACCGGCCACACTGGGACTGAGACACGGCCCAGACTCCTACGGGAGGCAGCAGTGGGGAATATTGCGCAATGGGCGGAAGCCTGACGCAGCGACGCCGCGTGGGGGATGACGGCCTTCGGGTTGTAAACCTCTTTCGCCAGGGACGAAGAGCAATTGACGGTACCTGGAGAAGAAGCA…	8-27f 152-1504r
11485	JX454518	Li et al., 2014	scleractinian corals			27–28	Luhuitou fringing reef (18°13′N, 109°28′E)	Tissue slurry homogenates			Actinobacteria	Actinobacteria	Streptomycetales	Streptomycetaceae	Streptomyces	sp.	100	marine agar, yeast extract agar, trehalose proline agar, raffinose histidine agar, pyruvic acid sodium asparagine agar	01-AUG-2012	TTCGGTGGTGGATTAGTGGCGAACGGGTGAGTAACACGTGGGCAATCTGCCCTTCACTCTGGGACAAGCCCTGGAAACGGGGTCTAATACCGGATAACACTCTGTCCCGCATGGGACGGGGTTAAAAGCTCCGGCGGTGAAGGATGAGCCCGCGGCCTATCAGCTTGTTGGTGGGGTAATGGCCTACCAAGGCGACGACGGGTAGCCGGCCTGAGAGGGCGACCGGCCACACTGGGACTGAGACACGGCCCAGACTCCTACGGGAGGCAGCAGTGGGGAATATTGCACAATGGGCGAAAGCCTGATGCAGCGACGCCGCGTGAGGGATGACGGCCTTCGGGTTGTAAACCTCTTTCAGCAGGGAAGAAGCGAAAGTGACGGTACCTGCAGAAGAAGCGC…	8-27f 152-1504r
11533	JX454519	Li et al., 2014	scleractinian corals			27–28	Luhuitou fringing reef (18°13′N, 109°28′E)	Tissue slurry homogenates			Actinobacteria	Actinobacteria	Corynebacteriales	Gordoniaceae	Gordonia	sp.	100	marine agar, yeast extract agar, trehalose proline agar, raffinose histidine agar, pyruvic acid sodium asparagine agar	01-AUG-2012	GGCCCAGCTTGCTGGGTACTCGAGTGGCGAACGGGTGAGTAACACGTGGGTGATCTGCCCTGCACTCTGGGATAAGCCTGGGAAACTGGGTCTAATACCGGATATGACCAACTGTCGCATGGTGGTTGGTGGAAAGCTTTTGCGGTGTGGGATGGGCCCGCGGCCTATCAGCTTGTTGGTGGGGTAATGGCCTACCAAGGCGACGACGGGTAGCCGACCTGAGAGGGTGATCGGCCACACTGGGACTGAGACACGGCCCAGACTCCTACGGGAGGCAGCAGTGGGGAATATTGCACAATGGGCGCAAGCCTGATGCAGCGACGCCGCGTGAGGGATGACGGCCTTCGGGTTGTAAACCTCTTTCACCAGGGACGAAGCGTGAGTGACGGTACCTGGAGA…	8-27f 152-1504r
6201-C1	HM173276	Gray et al., 2011	Paragorgia arborea				Cape Moffet Garden (51151.6940 N/1761 49.9960 W)	tissue and skeleton were cut, diced, and blended into a slurry	21 or 4 C	https://academic.oup.com/femsec/article/76/1/109/520994#95148611	Actinobacteria	Actinobacteria	Micrococcales	Micrococcaceae	Nesterenkonia	sp.	99	Vibrio-specific thiosulfate–citrate–bile salts (TCBS) agar, and glycerol artificial seawater agar (GASWA)	30-APR-2010	CGGTTGGATTAGTGGCGAACGGGTGAGTATCACGTGAGTAACCTTCCCTTGACTCTGGGATAAGCCCGGGAAACTGGGTCTAATACCGGATACGACCAGTCCTCGCATGGGGTGCTGGTGGAAAGATTTATCGGTCTTGGATGGACTCGCGGCCTATCAGCTTGTTGGTGAGGTAATAGCTCACCAAGGCGATGACGGGTAGCCGGCCTGAGAGGGTGACCGGCCACACTGGGACTGAGACACGGCCCAGACTCCTACGGGAGGCAGCAGTGGGGAATATTGCACAATGGGCGAAAGCCTGATGCAGCGACGCCGCGTGCGGGATGACGGCCTTCGGGTTGTAAACCGCTTTCAGCAGGGAAGAAGCGAAAGTGACGGTACCTGCAGAAGAAGCGCCGG…	Eco8F 1492R	https://academic.oup.com/femsec/article/76/1/109/520994#95148611
6203-C25	HM173287	Gray et al., 2011	Thouarella superba				Cape Moffet Garden (51151.6940 N/1761 49.9960 W)	tissue and skeleton were cut, diced, and blended into a slurry	21 or 4 C		Actinobacteria	Actinobacteria	Micrococcales	Micrococcaceae	Microbacterium	sp.	99	Vibrio-specific thiosulfate–citrate–bile salts (TCBS) agar, and glycerol artificial seawater agar (GASWA)	30-APR-2010	GTCGAACGGTGAAGGAGAGCTTGCTCTTTGGATCAGTGGCGAACGGGTGAGTAACACGTGAGCAATCTGCCCCTGACTCTGGGATAAGCGTTGGAAACGACGTCTAATACCGGATATGAGCTACGACCGCATGGTCGGTAGTTGGAAAGAATTTTGGTCAGGGATGAGCTCGCGGCCTATCAGCTTGTTGGTGAGGTAATGGCTCACCAAGGCGTCGACGGGTAGCCGGCCTGAGAGGGTGACCGGCCACACTGGGACTGAGACACGGCCCAGACTCCTACGGGAGGCAGCAGTGGGGAATATTGCACAATGGGCGCAAGCCTGATGCAGCAACGCCGCGTGAGGGACGACGGCCTTCGGGTTGTAAACCTCTTTTAGCGAGGAAGAAGCGAAAGTGAC…	Eco8F 1492R
Pc7	EU333115	Seemann et al., 2009	Palythoa caribaeorum				Curaçao, Netherland Antilles,			https://link.springer.com/article/10.1007%2Fs10482-009-9353-4	Actinobacteria	Actinobacteria	Propionibacteriales	Nocardioidaceae	Nocardioides	sp.	99	Blood agar	06-DEC-2007	CGAGCGGAAAGGCCACTTCGGTGGTACTCGAGCGGCGAACGGGTGAGTAACACGTGAGTAATCTGCCCCCCACTTTGGGATAGCCACCGGAAACGGTGATTAATACCGGATATGACCCTTGACCGCATGGTTGTGGGTGGAAAGTTTTTCGGTGGGGGATGTGCTCGCGGCCTATCAGCTTGATGGTGGGGTAATGGCCTACCATGGCTTCGACGGGTAGCCGGCCTGAGAGGGTGACCGGCCACACTGGGACTGAGACACGGCCCAGACTCCTACGGGAGGCAGCAGTGGGGAATATTGGACAATGGGCGGAAGCCTGATCCAGCAACGCCGCGTGAGGGATGACGGCCTTCGGGTTGTAAACCTCTTTCAGTACCGACGAAGCGAAAGTGACGGTAG…	(27f 1492r	https://link.springer.com/article/10.1007%2Fs10482-009-9353-4
Pc50	EU333123	Seemann et al., 2009	Palythoa caribaeorum				Curaçao, Netherland Antilles,				Actinobacteria	Actinobacteria	Micrococcales	Micrococcaceae	Micrococcus	sp.	99	Blood agar	06-DEC-2007	GTTGNNGGCCCAGCTTGCTGGGTGGATTAGTGGCGAACGGGTGAGTAACACGTGAGTAACCTGCCCTTAACTCTGGGATAAGCCTGGGAAACTGGGTCTAATACCGGATAGGAGCGCCTACCGCATGGTGGGTGTTGGAAAGATTTATCGGTTTTGGATGGACTCGCGGCCTATCAGCTTGTTGGTGAGGTAATGGCTCACCAAGGCGACGACGGGTAGCCGGCCTGAGAGGGTGACCGGCCACACTGGGACTGAGACACGGCCCAGACTCCTACGGGAGGCAGCAGTGGGGAATATTGCACAATGGGCGCAAGCCTGATGCAGCGACGCCGCGTGAGGGATGACGGCCTTCGGGTTGTAAACCTCTTTCAGTAGGGAAGAAGCGAAAGTGACGGTACC…	(27f 1492r
Pc77	EU333129	Seemann et al., 2009	Palythoa caribaeorum				Curaçao, Netherland Antilles,				Actinobacteria	Actinobacteria	Micrococcales	Brevibacteriaceae	Brevibacterium	sp.	99	Blood agar	06-DEC-2007	CGCTGAAGCCTGGTGCTTGCACCGGGTGGATGAGTGGCGAACGGGTGAGTAACACGTGAGTAACCTGCCCCTGACTTCGGGATAAGCCCGGGAAACTGGGTCTAATACCGGATACGACTGCCGGACGCATGTCTGGTGGTGGAAAGTTTTTTCGGTTGGGGATGGGCTCGCGGCCTATCAGTTTGTTGGTGAGGTAATGGCTCACCAAGACGACGACGGGTAGCCGGCCTGAGAGGGCGACCGGCCACACTGGGACTGAGACACGGCCCAGACTCCTACGGGAGGCAGCAGTGGGGAATATTGCACAATGGGGGAAACCCTGATGCAGCGACGCAGCGTGCGGGATGACGGCCTTCGGGTTGTAAACCGCTTTCAGCAGGGAAGAAGCGCAAGTGACGG…	(27f 1492r
Pc163	EU333139	Seemann et al., 2009	Palythoa caribaeorum				Curaçao, Netherland Antilles,				Actinobacteria	Actinobacteria	Micrococcales	Brevibacteriaceae	Brevibacterium	sp.	99	Blood agar	06-DEC-2007	CGAACGCTGAAGCCTGGTGCTTGCACCGGGTGGATGAGTGGCGAACGGGTGAGTAACACGTGAGTAACCTGCCCCTGACTTCGGGATAAGCCCGGGAAACTGGGTCTAATACCGGATACGACTGCCGGACGCATGTCTGGTGGTGGAAAGTTTTTTCGGTTGGGGATGGGCTCGCGGCCTATCAGTTTGTTGGTGAGGTAATGGCTCACCAAGACGACGACGGGTAGCCGGCCTGAGAGGGCGACCGGCCACACTGGGACTGAGACACGGCCCAGACTCCTACGGGAGGCAGCAGTGGGGAATATTGCACAATGGGGGAAACCCTGATGCAGCGACGCAGCGTGCGGGATGACGGCCTTCGGGTTGTAAACCGCTTTCAGCAGGGAAGAAGCGCAAGTG…	(27f 1492r
Pc172	EU333140	Seemann et al., 2009	Palythoa caribaeorum				Curaçao, Netherland Antilles,				Actinobacteria	Actinobacteria	Micrococcales	Micrococcaceae	Micrococcus	sp.	100	Blood agar	06-DEC-2007	GATTAGTGGCGAACGGGTGAGTAACACGTGAGTAACCTGCCCTTAACTCTGGGATAAGCCTGGGAAACTGGGTCTAATACCGGATAGGAGCGCCTACCGCATGGTGGGTGTTGGAAAGATTTATCGGTTTTGGATGGACTCGCGGCCTATCAGCTTGTTGGTGAGGTAATGGCTCACCAAGGCGACGACGGGTAGCCGGCCTGAGAGGGTGACCGGCCACACTGGGACTGAGACACGGCCCAGACTCCTACGGGAGGCAGCAGTGGGGAATATTGCACAATGGGCGCAAGCCTGATGCAGCGACGCCGCGTGAGGGATGACGGCCTTCGGGTTGTAAACCTCTTTCAGTAGGGAAGAAGCGAAAGTGACGGTACCTGCAGAAGAAGCACCGGCTAACTA…	(27f 1492r
Pc205	EU333142	Seemann et al., 2009	Palythoa caribaeorum				Curaçao, Netherland Antilles,				Actinobacteria	Actinobacteria	Micrococcales	Brevibacteriaceae	Brevibacterium	sp.	99	Blood agar	06-DEC-2007	TCGAACGCTGAAGCCTGGTGCTTGCACCGGGTGGATGAGTGGCGAACGGGTGAGTAACACGTGAGTAACCTGCCCCTGACTTCGGGTATAAGCCCGGGAAACTGGGTCTAATACCGGATACGACTGCCGGACGCATGTCTGGTGGTGGAAAGTTTTTTCGGTTGGGGATGGGCTCGCGGCCTATCAGTTTGTTGGTGAGGTAATGGCTCACCAAGACGACGACGGGTAGCCGGCCTGAGAGGGCGACCGGCCACACTGGGACTGAGACACGGCCCAGACTCCTACGGGAGGCAGCAGTGGGGAATATTGCACAATGGGGGAAACCCTGATGCAGCGACGCAGCGTGCGGGATGACGGCCTTCGGGTTGTAAACCGCTTTCAGCAGGGAAGAAGCGCAAG…	(27f 1492r
Pc229	EU333145	Seemann et al., 2009	Palythoa caribaeorum				Curaçao, Netherland Antilles,				Actinobacteria	Actinobacteria	Micrococcales	Brevibacteriaceae	Brevibacterium	sp.	99	Blood agar	06-DEC-2007	GCCTGGTGCTTGCACCGGGTGGATGAGTGGCGAACGGGTGAGTAACACGTGAGTAACCTGCCCCTGACTTCGGGATAAGCCCGGGAAACTGGGTCTAATACCGGATACGACTGCCGGACGCATGTCTGGTGGTGGAAAGTTTTTTCGGTTGGGGATGGGCTCGCGGCCTATCAGTTTGTTGGTGAGGTAATGGCTCACCAAGACGACGACGGGTAGCCGGCCTGAGAGGGCGACCGGCCACACTGGGACTGAGACACGGCCCAGACTCCTACGGGAGGCAGCAGTGGGGAATATTGCACAATGGGGGAAACCCTGATGCAGCGACGCAGCGTGCGGGATGACGGCCTTCGGGTTGTAAACCGCTTTCAGCAGGGAAGAAGCGCAAGTGACGGTACCTGC…	(27f 1492r
ZXY001	JN049450	Zhang et al., 2013	Acalycigorgia inermis		healthy		Sanya coral reef conservation (18°11′N, 109°25′E)			https://link.springer.com/article/10.1007/s11274-013-1279-3	Actinobacteria	Actinobacteria	Streptomycetales	Streptomycetaceae	Streptomyces	sp.	99	Custom media, see reference for details	02-JUN-2011	CTACCATGCAGTCGACGATGACCACTTCGGTGGGGATTAGTGGCGAACGGGTGAGTAACACGTGGGCAATCTGCCCTGCACTCTGGGACAAGCCCTGGAAACGGGGTCTAATACCGGATACTGACCCGCCTGGGCATCCAGGCGGTTCGAAAGCTCCGGCGGTGCAGGATGAGCCCGCGGCCTATCAGCTTGTTGGTGAGGTAACGGCTCACCAAGGCGACGACGGGTAGCCGGCCTGAGAGGGCGACCGGCCACACTGGGACTGAGACACGGCCCAGACTCCTACGGGAGGCAGCAGTGGGGAATATTGCACAATGGGCGAAAGCCTGATGCAGCGACGCCGCGTGAGGGATGACGGCCTTCGGGTTGTAAACCTCTTTCAGCAGGGAAGAAGCGAAA…	27F 1525R	https://link.springer.com/article/10.1007/s11274-013-1279-3
ZXY002	JN049451	Zhang et al., 2013	Acalycigorgia inermis		healthy		Sanya coral reef conservation (18°11′N, 109°25′E)				Actinobacteria	Actinobacteria	Streptomycetales	Streptomycetaceae	Streptomyces	sp.	99	Custom media, see reference for details	02-JUN-2011	GGAGGGCTCTACCATGCAGTCGACGCCGAACCGCCTTCGGGCGGGGAGGAGTGGCGAACGGGTGAGTAACACGTGGGCAATCTGCCCTGCACTCTGGGATAACTCCGGGAAACCGGAGCTAATACCGGATACGACCTTCCAGGGCATCCTGGGGGGTGGAAAGCTCCGGCGGTGCAGGATGAGCCCGCGGCCTATCAGCTGGTTGGTGGGGTGACGGCCCACCAAGGCGACGACGGGTAGCCGGCCTGAGAGGGCGACCGGCCACACTGGGACTGAGACACGGCCCAGACTCCTACGGGAGGCAGCAGTGGGGAATATTGCACAATGGGCGCAAGCCTGATGCAGCGACGCCGCGTGAGGGATGACGGCCTTCGGGTTGTAAACCTCTTTCAGCAGGGA…	27F 1525R
ZXY003	JN049452	Zhang et al., 2013	Acalycigorgia inermis		healthy		Sanya coral reef conservation (18°11′N, 109°25′E)				Actinobacteria	Actinobacteria	Streptomycetales	Streptomycetaceae	Streptomyces	sp.	99	Custom media, see reference for details	02-JUN-2011	CTACCATGCAGTCGACGATGAAGCCGCTTCGGTGGTGGATTAGTGGCGAACGGGTGAGTAACACGTGGGCAATCTGCCCTGCACTCTGGGACAAGCCCTGGAAACGGGGTCTAATACCGGATACGACACAGGAAGGCATCTTCTCTGTGTGGAAAGCTCCGGCGGTGCAGGATGAGCCCGCGGCCTATCAGCTTGTTGGTGGGGTGATGGCCTACCAAGGCGACGACGGGTAGCCGGCCTGAGAGGGCGACCGGCCACACTGGGACTGAGACACGGCCCAGACTCCTACGGGAGGCAGCAGTGGGGAATATTGCACAATGGGCGCAAGCCTGATGCAGCGACGCCGCGTGAGGGATGACGGCCTTCGGGTTGTAAACCTCTTTCAGCAGGGAAGAAGCG…	27F 1525R
ZXY004	JN049453	Zhang et al., 2013	Acalycigorgia inermis		healthy		Sanya coral reef conservation (18°11′N, 109°25′E)				Actinobacteria	Actinobacteria	Streptomycetales	Streptomycetaceae	Streptomyces	sp.	99	Custom media, see reference for details	02-JUN-2011	CTTACCATGCAGTCGACGATGACCTCCTTCGGGAGGGGATTAGTGGCGAACGGGTGAGTAACACGTGGGCAATCTGCCCTGCACTCTGGGACAAGCCCTGGAAACGGGGTCTAATACCGGATACTGACCCGCTTGGGCATCCAAGCGGTTCGAAAGCTCCGGCGGTGCAGGATGAGCCCGCGGCCTATCAGCTTGTTGGTGAGGTAATGGCTCACCAAGGCGACGACGGGTAGCCGGCCTGAGAGGGCGACCGGCCACACTGGGACTGAGACACGGCCCAGACTCCTACGGGAGGCAGCAGTGGGGAATATTGCACAATGGGCGAAAGCCTGATGCAGCGACGCCGCGTGAGGGATGACGGCCTTCGGGTTGTAAACCTCTTTCAGCAGGGAAGAAGCG…	27F 1525R
ZXY005	JN049454	Zhang et al., 2013	Acalycigorgia inermis		healthy		Sanya coral reef conservation (18°11′N, 109°25′E)				Actinobacteria	Actinobacteria	Streptomycetales	Streptomycetaceae	Streptomyces	sp.	99	Custom media, see reference for details	02-JUN-2011	GGTCTACCATGCAGTCGACGGTGAAGCCCTTCGGGGTGGATCAGTGGCGAACGGGTGAGTAACACGTGGGCAATCTGCCCTGCACTCTGGGACAACCCGGGGAAACCCGGGCTAATACCGGATACGACCCTCCAGGGCATCTTGGGGGGTGGAAAGCTCCGGCGGTGCAGGATGAGCCCGCGGCCTATCAGCTTGTTGGTGGGGTGATGGCCCACCAAGGCGACGACGGGTAGCCGGCCTGAGAGGGCGACCGGCCACACTGGGACTGAGACACGGCCCAGACTCCTACGGGAGGCAGCAGTGGGGAATATTGCACAATGGGCGAAAGCCTGATGCAGCGACGCCGCGTGAGGGATGACGGCCTTCGGGTTGTAAACCTCTTTCAGCAGGGAAGAAGCG…	27F 1525R
ZXY006	JN049455	Zhang et al., 2013	Acalycigorgia inermis		healthy		Sanya coral reef conservation (18°11′N, 109°25′E)				Actinobacteria	Actinobacteria	Corynebacteriales	Nocardiaceae	Nocardia	sp.	99	Custom media, see reference for details	02-JUN-2011	CGGTCTACCATGCAGTCGAGCGGTAGGCCCTTCGGGGTACACGAGCGGCGAACGGGTGAGTAACACGTGGGTGATCTGCCTTGCACTCTGGGATAAGCCTGGGAAACTGGGTCTAATACCGGATATGACCTGCAGTTGCATGACTGTGGGTGGAAAGATTTATCGGTGCAAGATGAGCCCGCGGCCTATCAGCTTGTTGGTGGGGTAATGGCCTACCAAGGCGACGACGGGTAGCCGGCCTGAGAGGGCGACCGGCCACACTGGGACTGAGACACGGCCCAGACTCCTACGGGAGGCAGCAGTGGGGAATATTGCACAATGGGCGGAAGCCTGATGCAGCGACGCCGCGTGAGGGATGACGGCCTTCGGGTTGTAAACCTCTTTCGACTCCGACGAAGC…	27F 1525R
ZXY007	JN049456	Zhang et al., 2013	Acalycigorgia inermis		healthy		Sanya coral reef conservation (18°11′N, 109°25′E)				Actinobacteria	Actinobacteria	Streptomycetales	Streptomycetaceae	Streptomyces	sp.	99	Custom media, see reference for details	02-JUN-2011	GCTCTACCATGCAGTCGACGATGAACCGCTTTCGGGCGGGGATTAGTGGCGAACGGGTGAGTAACACGTGGGCAATCTGCCCTGCACTCTGGGACAAGCCCTGGAAACGGGGTCTAATACCGGATATGACCGTCTGCCGCATGGTGGATGGTGTAAAGCTCCGGCGGTGCAGGATGAGCCCGCGGCCTATCAGCTTGTTGGTGAGGTAGTGGCTCACCAAGGCGACGACGGGTAGCCGGCCTGAGAGGGCGACCGGCCACACTGGGACTGAGACACGGCCCAGACTCCTACGGGAGGCAGCAGTGGGGAATATTGCACAATGGGCGAAAGCCTGATGCAGCGACGCCGCGTGAGGGATGACGGCCTTCGGGTTGTAAACCTCTTTCAGCAGGGAAGAAG…	27F 1525R
ZXY008	JN049457	Zhang et al., 2013	Melitodes squamata		healthy		Sanya coral reef conservation (18°11′N, 109°25′E)				Actinobacteria	Actinobacteria	Micromonosporales	Micromonosporaceae	NA	sp.	99	Custom media, see reference for details	02-JUN-2011	TTCCGTTCGCTGCTTACCATGCAGTCGAGCGGAAGGCCCTTCGGGGTACTCGAGCGGCGAACGGGTGAGTAACACGTGAGCAACCTGCCCTAGGCTTTGGGATAACCCTCGGAAACGGGGGCTAATACCGAATATTCACTCATGGGCGCATGTTTGTGGGTGGAAAGTTTTTCGGCTTGGGATGGGCTCGCGGCCTATCAGCTTGTTGGTGGGGTAATGGCCTACCAAGGCGACGACGGGTAGCCGGCCTGAGAGGGCGACCGGCCACACTGGGACTGAGACACGGCCCAGACTCCTACGGGAGGCAGCAGTGGGGAATATTGCACAATGGGCGGAAGCCTGATGCAGCGACGCCGCGTGAGGGATGACGGCCTTCGGGTTGTAAACCTCTTTCAGCAG…	27F 1525R
ZXY009	JN049458	Zhang et al., 2013	Melitodes squamata		healthy		Sanya coral reef conservation (18°11′N, 109°25′E)				Actinobacteria	Actinobacteria	Streptomycetales	Streptomycetaceae	Streptomyces	sp.	99	Custom media, see reference for details	02-JUN-2011	GCAGTACGGGTCTACCATGCAGTCGACGATGAAGCCCTTCGGGGTGGATTAGTGGCGAACGGGTGAGTAACACGTGGGCAATCTGCCCTTCACTCTGGGACAAGCCCTGGAAACGGGGTCTAATACCGGATAATACTTTCTTCCTCCTGGGAGAAGGTTGAAAGCTCCGGCGGTGAAGGATGAGCCCGCGGCCTATCAGCTAGTTGGTGGGGTAATGGCCTACCAAGGCGACGACGGGTAGCCGGCCTGAGAGGGCGACCGGCCACACTGGGACTGAGACACGGCCCAGACTCCTACGGGAGGCAGCAGTGGGGAATATTGCACAATGGGCGAAAGCCTGATGCAGCGACGCCGCGTGAGGGATGACGGCCTTCGGGTTGTAAACCTCTTTCAGCAGGG…	27F 1525R
ZXY010	JN049459	Zhang et al., 2013	Melitodes squamata		healthy		Sanya coral reef conservation (18°11′N, 109°25′E)				Actinobacteria	Actinobacteria	Streptomycetales	Streptomycetaceae	Streptomyces	sp.	99	Custom media, see reference for details	02-JUN-2011	GACATGGCGCCTCTACCATGCAGTCGACGATGACCACCTTCGGGGTGGATTAGTGGCGAACGGGTGAGTAACACGTGGGCAATCTGCCCTGCACTCTGGGACAAGCCCTGGAAACGGGGTCTAATACCGGATACTGATCGCCTTGGGCATCCTTGGTGATCGAAAGCTCCGGCGGTGCAGGATGAGCCCGCGGCCTATCAGCTTGTTGGTGAGGTAATGGCTCACCAAGGCGACGACGGGTAGCCGGCCTGAGAGGGCGACCGGCCACACTGGGACTGAGACACGGCCCAGACTCCTACGGGAGGCAGCAGTGGGGAATATTGCACAATGGGCGAAAGCCTGATGCAGCGACGCCGCGTGAGGGATGACGGCCTTCGGGTTGTAAACCTCTTTCAGCAG…	27F 1525R
ZXY011	JN049460	Zhang et al., 2013	Melitodes squamata		healthy		Sanya coral reef conservation (18°11′N, 109°25′E)				Actinobacteria	Actinobacteria	Pseudonocardiales	Pseudonocardiaceae	Saccharomonospora	sp.	99	Custom media, see reference for details	02-JUN-2011	TCCCGTTCCGCTCTACCATGCAGTCGACGCTGAGCTCAGCTTGCTGGGTGGATGAGTGGCGAACGGGTGAGTAACACGTGGGTAATCTGCCCTGTACTCTGGGATAAGCCTGGGAAACTGGGTCTAATACCGGATAGGACACATCACCGCATGGTGGTGTGTGGAAAGTTCCGGCGGTACAGGTTGAGCCCGCGGCCTATCAGCTTGTTGGTGGGGTGATGGCCTACCAAGGCGACGACGGGTAGCCGGCCTGAGAGGGTGACCGGCCACACTGGGACTGAGACACGGCCCAGACTCCTACGGGAGGCAGCAGTGGGGAATATTGCACAATGGGCGCAAGCCTGATGCAGCGACGCCGCGTGGGGGATGACGGCCTTCGGGTTGTAAACCCCTTTCGCC…	27F 1525R
ZXY012	JN049461	Zhang et al., 2013	Melitodes squamata		healthy		Sanya coral reef conservation (18°11′N, 109°25′E)				Actinobacteria	Actinobacteria	Streptomycetales	Streptomycetaceae	Streptomyces	sp.	99	Custom media, see reference for details	02-JUN-2011	GGCAGAACGGCTCTACCATGCAGTCGACGATGACCACTTCGGTGGGGATTAGTGGCGAACGGGTGAGTAACACGTGGGCAATCTGCCCTGCACTCTGGGACAAGCCCTGGAAACGGGGTCTAATACCGGATACTGACCCTCGCAGGCATCTGCGAGGTTCGAAAGCTCCGGCGGTGCAGGATGAGCCCGCGGCCTATCAGCTTGTTGGTGAGGTAATGGCTCACCAAGGCGACGACGGGTAGCCGGCCTGAGAGGGCGACCGGCCACACTGGGACTGAGACACGGCCCAGACTCCTACGGGAGGCAGCAGTGGGGAATATTGCACAATGGGCGAAAGCCTGATGCAGCGACGCCGCGTGAGGGATGACGGCCTTCGGGTTGTAAACCTCTTTCAGCAGG…	27F 1525R
ZXY013	JN049462	Zhang et al., 2013	Melitodes squamata		healthy		Sanya coral reef conservation (18°11′N, 109°25′E)				Actinobacteria	Actinobacteria	Streptomycetales	Streptomycetaceae	Streptomyces	sp.	99	Custom media, see reference for details	02-JUN-2011	CTCTACCATGCAGTCGACGATGACCACCTTCGGGTGGGGATTAGTGGCGAACGGGTGAGTAACACGTGGGCAATCTGCCCTGCACTCTGGGACAAGCCCTGGAAACGGGGTCTAATACCGGATACTGACCTGCCAAGGCATCTTGGCGGGTCGAAAGCTCCGGCGGTGCAGGATGAGCCCGCGGCCTATCAGCTTGTTGGTGAGGTAATGGCTCACCAAGGCGACGACGGGTAGCCGGCCTGAGAGGGCGACCGGCCACACTGGGACTGAGACACGGCCCAGACTCCTACGGGAGGCAGCAGTGGGGAATATTGCACAATGGGCGAAAGCCTGATGCAGCGACGCCGCGTGAGGGATGACGGCCTTCGGGTTGTAAACCTCTTTCAGCAGGGAAGAAGC…	27F 1525R
DQ4162	JN049463	Zhang et al., 2013	Melitodes squamata		healthy		Sanya coral reef conservation (18°11′N, 109°25′E)				Actinobacteria	Actinobacteria	Streptomycetales	Streptomycetaceae	Streptomyces	sp.	97	Custom media, see reference for details	02-JUN-2011	GTGCCGGGCGGTCTTACCATGCAGTCGACGATGATCCGGTTTCGGCCGGTGATTAGTGGCGAACGGGTGAGTAACACGTGGGTAATCTGCCCTGCACTCTGGGATAAGCTCGGGAAACTGGGTCTAATACCGGATATGACCGGAAGTCGCATGGTTTCTGGTGGAAAGCTTTTGCGGTGTGGGATGGGCCCGCGGCCTATCAGCTTGTTGGTGGGGTGATGGCCTACCAAGGCGACGACGGGTAGCCGGCCTGAGAGGGTGACCGGCCACACTGGGACTGAGACACGGCCCAGACTCCTACGGGAGGCAGCAGTGGGGAATATTGCACAATGGGCGAAAGCCTGATGCAGCGACGCCGCGTGAGGGATGACGGCCTTCGGGTTGTAAACCTCTTTCAGC…	27F 1525R
ZXY015	JN049464	Zhang et al., 2013	Melitodes squamata		healthy		Sanya coral reef conservation (18°11′N, 109°25′E)				Actinobacteria	Actinobacteria	Streptomycetales	Streptomycetaceae	Streptomyces	sp.	99	Custom media, see reference for details	02-JUN-2011	CTACCATGCAGTCGACGATGAACCGGTTTCGGCCGGGGATTAGTGGCGAACGGGTGAGTAACACGTGGGCAATCTGCCCTGCACTCTGGGATAAGCCCGGGAAACTGGGTCTAATACCGGATACGACACTCCGAGGCATCTTGGGGTGTGGAAAGTTCCGGCGGTGCAGGATGAGCCCGCGGCCTATCAGCTTGTTGGTGGGGTAATGGCCTACCAAGGCGACGACGGGTAGCCGGCCTGAGAGGGTGACCGGCCACACTGGGACTGAGACACGGCCCAGACTCCTACGGGAGGCAGCAGTGGGGAATATTGCACAATGGGCGAAAGCCTGATGCAGCGACGCCGCGTGAGGGATGACGGCCTTCGGGTTGTAAACCTCTTTCAGCAGGGAAGAAGCGA…	27F 1525R
ZXY016	JN049465	Zhang et al., 2013	Melitodes squamata		healthy		Sanya coral reef conservation (18°11′N, 109°25′E)				Actinobacteria	Actinobacteria	Streptomycetales	Streptomycetaceae	Streptomyces	sp.	99	Custom media, see reference for details	02-JUN-2011	GGTCGGTGGGGTCTACCATGCAGTCGACGATGACCACTTCGGTGGGGATTAGTGGCGAACGGGTGAGTAACACGTGGGCAATCTGCCCTGCACTCTGGGACAAGCCCTGGAAACGGGGTCTAATACCGGATACTGATCCTCGCAGGCATCTGCGAGGTTCGAAAGCTCCGGCGGTGCAGGATGAGCCCGCGGCCTATCAGCTAGTTGGTGAGGTAACGGCTCACCAAGGCGACGACGGGTAGCCGGCCTGAGAGGGCGACCGGCCACACTGGGACTGAGACACGGCCCAGACTCCTACGGGAGGCAGCAGTGGGGAATATTGCACAATGGGCGAAAGCCTGATGCAGCGACGCCGCGTGAGGGATGACGGCCTTCGGGTTGTAAACCTCTTTCAGCAGG…	27F 1525R
ZXY017	JN049466	Zhang et al., 2013	Melitodes squamata		healthy		Sanya coral reef conservation (18°11′N, 109°25′E)				Actinobacteria	Actinobacteria	Streptomycetales	Streptomycetaceae	Streptomyces	sp.	99	Custom media, see reference for details	02-JUN-2011	CTACCATGCAGTCGACGATGAACCCACTTCGGTGGGGGATTAGTGGCGAACGGGTGAGTAACACGTGGGCAATCTGCCCTGCACTCTGGGACAAGCCCTGGAAACGGGGTCTAATACCGGATACGACCACTTCAGGCATCTGATGGTGGTGGAAAGCTCCGGCGGTGCAGGATGAGCCCGCGGCCTATCAGCTAGTTGGTGAGGTAACGGCTCACCAAGGCGACGACGGGTAGCCGGCCTGAGAGGGCGACCGGCCACACTGGGACTGAGACACGGCCCAGACTCCTACGGGAGGCAGCAGTGGGGAATATTGCACAATGGGCGAAAGCCTGATGCAGCGACGCCGCGTGAGGGATGACGGCCTTCGGGTTGTAAACCTCTTTCAGCAGGGAAGAAGCG…	27F 1525R
ZXY018	JN049467	Zhang et al., 2013	Melitodes squamata		healthy		Sanya coral reef conservation (18°11′N, 109°25′E)				Actinobacteria	Actinobacteria	Streptomycetales	Streptomycetaceae	Streptomyces	sp.	99	Custom media, see reference for details	02-JUN-2011	CTTACCATGCAGTCGACGATGAAGCCGCTTCGGTGGTGGATTAGTGGCGAACGGGTGAGTAACACGTGGGCAATCTGCCCTGCACTCTGGGACAAGCCCTGGAAACGGGGTCTAATACCGGATACGACACAGGAAGGCATCTTCTCTGTGTGGAAAGCTCCGGCGGTGCAGGATGAGCCCGCGGCCTATCAGCTTGTTGGTGGGGTGATGGCCTACCAAGGCGACGACGGGTAGCCGGCCTGAGAGGGCGACCGGCCACACTGGGACTGAGACACGGCCCAGACTCCTACGGGAGGCAGCAGTGGGGAATATTGCACAATGGGCGAAAGCCTGATGCAGCGACGCCGCGTGAGGGATGACGGCCTTCGGGTTGTAAACCTCTTTCAGCAGGGAAGAAGC…	27F 1525R
ZXY019	JN049468	Zhang et al., 2013	Melitodes squamata		healthy		Sanya coral reef conservation (18°11′N, 109°25′E)				Actinobacteria	Actinobacteria	Streptomycetales	Streptomycetaceae	Streptomyces	sp.	99	Custom media, see reference for details	02-JUN-2011	CTACCATGCAGTCGACGATGAACCACTTCGGTGGGGATTAGTGGCGAACGGGTGAGTAACACGTGGGCAATCTGCCCTGCACTCTGGGACAAGCCCTGGAAACGGGGTCTAATACCGGATACTGATCATCTTGGGCATCCTTGATGATCGAAAGCTCCGGCGGTGCAGGATGAGCCCGCGGCCTATCAGCTTGTTGGTGAGGTAACGGCTCACCAAGGCGACGACGGGTAGCCGGCCTGAGAGGGCGACCGGCCACACTGGGACTGAGACACGGCCCAGACTCCTACGGGAGGCAGCAGTGGGGAATATTGCACAATGGGCGCAAGCCTGATGCAGCGACGCCGCGTGAGGGATGACGGCCTTCGGGTTGTAAACCTCTTTCAGCAGGGAAGAAGCGAA…	27F 1525R
ZXY021	JN049470	Zhang et al., 2013	Subergorgia reticulata		healthy		Sanya coral reef conservation (18°11′N, 109°25′E)				Actinobacteria	Actinobacteria	Micromonosporales	Micromonosporaceae	Micromonospora	sp.	99	Custom media, see reference for details	02-JUN-2011	GGGGGTGCTACCATGCAGTCGAGCGGAAGGCCCTTCGGGGTACTCGAGCGGCGAACGGGTGAGTAACACGTGAGCAACCTGCCCCAGGCTTTGGGATAACCCCGGGAAACCGGGGCTAATACCGAATATGACCTCCGATCGCATGGTTGGTGGTGGAAAGTTTTTCGGCTTGGGATGGGCTCGCGGCCTATCAGCTTGTTGGTGGGGTGATGGCCTACCAAGGCGACGACGGGTAGCCGGCCTGAGAGGGCGACCGGCCACACTGGGACTGAGACACGGCCCAGACTCCTACGGGAGGCAGCAGTGGGGAATATTGCACAATGGGCGGAAGCCTGATGCAGCGACGCCGCGTGAGGGATGACGGCCTTCGGGTTGTAAACCTCTTTCAGCAGGGACGAA…	27F 1525R
ZXY022	JN049471	Zhang et al., 2013	Subergorgia reticulata		healthy		Sanya coral reef conservation (18°11′N, 109°25′E)				Actinobacteria	Actinobacteria	Streptomycetales	Streptomycetaceae	Streptomyces	sp.	99	Custom media, see reference for details	02-JUN-2011	ACCATGCAGTCGAACGCCGAACCGCCTTCGGGCGGGGAGGAGTGGCGAACGGGTGAGTAACACGTGGGCAATCTGCCCTGCACTCTGGGATAACTCCGGGAAACCGGAGCTAATACCGGATACGACTCTCCAGGGCATCCTGGAGGGTGGAAAGCTCCGGCGGTGCAGGATGAGCCCGCGGCCTATCAGCTGGTTGGTGGGGTGATGGCCTACCAAGGCGACGACGGGTAGCCGGCCTGAGAGGGCGACCGGCCACACTGGGACTGAGACACGGCCCAGACTCCTACGGGAGGCAGCAGTGGGGAATATTGCACAATGGGCGCAAGCCTGATGCAGCGACGCCGCGTGAGGGATGACGGCCTTCGGGTTGTAAACCTCTTTCAGCAGGGAAGAAGCGCG…	27F 1525R
ZXY024	JN049473	Zhang et al., 2013	Subergorgia reticulata		healthy		Sanya coral reef conservation (18°11′N, 109°25′E)				Actinobacteria	Actinobacteria	Corynebacteriales	Nocardiaceae	Nocardia	sp.	99	Custom media, see reference for details	02-JUN-2011	GGGTTGGGGTCTTACCATGCAGTCGAGCGGTAAGGCCCTTCGGGGTACACGAGCGGCGAACGGGTGAGTAACACGTGGGTGATCTGCCTCGCACTCTGGGATAAGCCTGGGAAACTGGGTCTAATACCGGATATGACCTTACATCGCATGGTGTTTGGTGGAAAGATTTATCGGTGCGAGATGGGCCCGCGGCCTATCAGCTTGTTGGTGGGGTAATGGCCTACCAAGGCGACGACGGGTAGCCGGCCTGAGAGGGCGACCGGCCACACTGGGACTGAGACACGGCCCAGACTCCTACGGGAGGCAGCAGTGGGGAATATTGCACAATGGGCGAAAGCCTGATGCAGCGACGCCGCGTGAGGGATGACGGCCTTCGGGTTGTAAACCTCTTTCGACAGG…	27F 1525R
ZXY025	JN049474	Zhang et al., 2013	Subergorgia suberosa		healthy		Sanya coral reef conservation (18°11′N, 109°25′E)				Actinobacteria	Actinobacteria	Micromonosporales	Micromonosporaceae	Micromonospora	sp.	99	Custom media, see reference for details	02-JUN-2011	TGCAGTGCGCTGCTTACCATGCAGTCGAGCGGAAGGCCCTTCGGGGTACTCGAGCGGCGAACGGGTGAGTAACACGTGAGCAACCTGCCCCAGGCTTTGGGATAACCCCGGGAAACCGGGGCTAATACCGAATATGACCTCCGATCGCATGGTTGGTGGTGGAAAGTTTTTCGGCTTGGGATGGGCTCGCGGCCTATCAGCTTGTTGGTGGGGTGATGGCCTACCAAGGCGACGACGGGTAGCCGGCCTGAGAGGGCGACCGGCCACACTGGGACTGAGACACGGCCCAGACTCCTACGGGAGGCAGCAGTGGGGAATATTGCACAATGGGCGGAAGCCTGATGCAGCGACGCCGCGTGAGGGATGACGGCCTTCGGGTTGTAAACCTCTTTCAGCAGG…	27F 1525R
ZXY026	JN049475	Zhang et al., 2013	Subergorgia suberosa		healthy		Sanya coral reef conservation (18°11′N, 109°25′E)				Actinobacteria	Actinobacteria	Streptosporangiales	Nocardiopsaceae	Nocardiopsis	sp.	99	Custom media, see reference for details	02-JUN-2011	GTTTTCCATGCGATCTTACCATGCAGTCGAGCGGTAAGGCCCTTCGGGGTACACGAGCGGCGAACGGGTGAGTAACACGTGAGCAACCTGCCCCTGACTCTGGGATAAGCGGTGGAAACGCCGTCTAATACCGGATACGACCCACCACCTCATGGTGGAGGGTGGAAAGTTTTATCGGTCAGGGATGGGCTCGCGGCCTATCAGCTTGTTGGTGGGGTAACGGCCTACCAAGGCGATTACGGGTAGCCGGCCTGAGAGGGCGACCGGCCACACTGGGACTGAGACACGGCCCAGACTCCTGCGGGAGGCAGCAGTGGGGAATATTGCACAATGGGCGAAAGCCTGATGCAGCGACGCCGCGTGGGGGATGACGGCCTTCGGGTTGTAAACCTCTTTTAC…	27F 1525R
ZXY027	JN049476	Zhang et al., 2013	Subergorgia suberosa		healthy		Sanya coral reef conservation (18°11′N, 109°25′E)				Actinobacteria	Actinobacteria	Micromonosporales	Micromonosporaceae	Micromonospora	sp.	99	Custom media, see reference for details	02-JUN-2011	GCCAGTACGCTCTACCATGCAGTCGAGCGGAAGGCCCTTCGGGGTACTCGAGCGGCGAACGGGTGAGTAACACGTGAGCAACCTGCCCTAGGCTTTGGGATAACCCCGGGAAACCGGGGCTAATACCGAATATTACCTCTGACCGCATGGTTGGTGGTGGAAAGTTTTTCGGCCTGGGATGGGCTCGCGGCCTATCAGCTTGTTGGTGGGGTGATGGCCTACCAAGGCGACGACGGGTAGCCGGCCTGAGAGGGCGACCGGCCACACTGGGACTGAGACACGGCCCAGACTCCTACGGGAGGCAGCAGTGGGGAATATTGCACAATGGGCGGAAGCCTGATGCAGCGACGCCGCGTGAGGGATGACGGCCTTCGGGTTGTAAACCTCTTTCAGCAGGGA…	27F 1525R
ZXY028	JN049477	Zhang et al., 2013	Subergorgia suberosa		healthy		Sanya coral reef conservation (18°11′N, 109°25′E)				Actinobacteria	Actinobacteria	Streptomycetales	Streptomycetaceae	Streptomyces	sp.	98	Custom media, see reference for details	02-JUN-2011	CGGCAAGGGGGGGGTTCGTTCATCTGCGTCTACCATGCAGTCGACGATGAAGCCGCTTCGGTGGTGGATTAGTGGCGAACGGGTGAGTAACACGTGGGCAATCTGCCCTGCACTCTGGGACAAGCCCTGGAAACGGGGTCTAATACCGGATATGACACAGGGGGGCATCTTTCTGTGTGGAAAGCTCCGGCGGTGCAGGATGAGCCCGCGGCCTATCAGCTTGTTGGTGGGGTGATGGCCTACCAAGGCGACGACGGGTAGCCGGCCTGAGAGGGCGACCGGCCACACTGGGACTGAGACACGGCCCAGACTCCTACGGGAGGCAGCAGTGGGGAATATTGCACAATGGGCGCAAGCCTGATGCAGCGACGCCGCGTGAGGGATGACGGCCTTCGGGTT…	27F 1525R
ZXY029	JN049478	Zhang et al., 2013	Subergorgia suberosa		healthy		Sanya coral reef conservation (18°11′N, 109°25′E)				Actinobacteria	Actinobacteria	Corynebacteriales	Dietziaceae	Dietzia	sp.	99	Custom media, see reference for details	02-JUN-2011	GGAATCGGTCTACCATGCAGTCGACGGTAAGGCCCTTTCGGGGGTACACGAGTGGCGAACGGGTGAGTAACACGTGGGTAATCTGCCCTGCACTTCGGGATAAGCCTGGGAAACCGGGTCTAATACCGGATATGAATTCCTGCCGCATGGTGGGGGTTGGAAAGTTTTTCGGTGCAGGATGAGCCCGCGGCCTATCAGCTTGTTGGTGGGGTAATGGCCTACCAAGGCGACGACGGGTAGCCGGCCTGAGAGGGTGATCGGCCACACTGGGACTGAGACACGGCCCAGACTCCTACGGGAGGCAGCAGTGGGGAATATTGCACAATGGGCGGAAGCCTGATGCAGCGACGCCGCGTGGGGGATGACGGTCTTCGGATTGTAAACCCCTTTCAGTAGGGA…	27F 1525R
ZXY030	JN049479	Zhang et al., 2013	Subergorgia suberosa		healthy		Sanya coral reef conservation (18°11′N, 109°25′E)				Actinobacteria	Actinobacteria	Corynebacteriales	Nocardiaceae	Rhodococcus	sp.	99	Custom media, see reference for details	02-JUN-2011	CTACCATGCAGTCGACGATGAAGCCCAGCTTGCTGGGTGGATTAGTGGCGAACGGGTGAGTAACACGTGGGTGATCTGCCCTGCACTTCGGGATAAGCCTGGGAAACTGGGTCTAATACCGGATAGGACCTCGGGATGCATGTTCCGGGGTGGAAAGGTTTTCCGGTGCAGGATGGGCCCGCGGCCTATCAGCTTGTTGGTGGGGTAACGGCCCACCAAGGCGACGACGGGTAGCCGGCCTGAGAGGGCGACCGGCCACACTGGGACTGAGACACGGCCCAGACTCCTACGGGAGGCAGCAGTGGGGAATATTGCACAATGGGCGCAAGCCTGATGCAGCGACGCCGCGTGAGGGATGACGGCCTTCGGGTTGTAAACCTCTTTCAGTACCGACGAAGC…	27F 1525R
ZXY031	JN049480	Zhang et al., 2013	Subergorgia suberosa		healthy		Sanya coral reef conservation (18°11′N, 109°25′E)				Actinobacteria	Actinobacteria	Micromonosporales	Micromonosporaceae	NA	sp.	99	Custom media, see reference for details	02-JUN-2011	GCAGTGGGGGTCTTACCATGCAGTCGAGCGGAAGGCCCTTCGGGGTACTCGAGCGGCGAACGGGTGAGTAACACGTGAGCAACCTGCCCTAGGCTTTGGGATAACCCTCGGAAACGGGGGCTAATACCGAATATTCACTCATGGGCGCATGTTTGTGGGTGGAAAGTTTTTCGGCTTGGGATGGGCTCGCGGCCTATCAGCTTGTTGGTGGGGTAATGGCCTACCAAGGCGACGACGGGTAGCCGGCCTGAGAGGGCGACCGGCCACACTGGGACTGAGACACGGCCCAGACTCCTACGGGAGGCAGCAGTGGGGAATATTGCACAATGGGCGGAAGCCTGATGCAGCGACGCCGCGTGAGGGATGACGGCCTTCGGGTTGTAAACCTCTTTCAGCAGG…	27F 1525R
ZXY032	JN049481	Zhang et al., 2013	Subergorgia suberosa		healthy		Sanya coral reef conservation (18°11′N, 109°25′E)				Actinobacteria	Actinobacteria	Corynebacteriales	Nocardiaceae	Nocardia	sp.	99	Custom media, see reference for details	02-JUN-2011	GGCTCTACCATGCAGTCGAGCGGTAAGGCCCTTCGGGGTACACGAGCGGCGAACGGGTGAGTAACACGTGGGTGATCTGCCTTGCACTCTGGGATAAGCCTGGGAAACTGGGTCTAATACCGGATATGACCTGCAGTTGCATGATTGTGGGTGGAAAGATTTATCGGTGCAAGATGAGCCCGCGGCCTATCAGCTTGTTGGTGGGGTAATGGCCTACCAAGGCGACGACGGGTAGCCGGCCTGAGAGGGCGACCGGCCACACTGGGACTGAGACACGGCCCAGACTCCTACGGGAGGCAGCAGTGGGGAATATTGCACAATGGGCGGAAGCCTGATGCAGCGACGCCGCGTGAGGGATGACGGCCTTCGGGTTGTAAACCTCTTTCGACTCCGACGAAG…	27F 1525R
ZXY033	JN049482	Zhang et al., 2013	Subergorgia suberosa		healthy		Sanya coral reef conservation (18°11′N, 109°25′E)				Actinobacteria	Actinobacteria	Pseudonocardiales	Pseudonocardiaceae	Pseudonocardia	sp.	99	Custom media, see reference for details	02-JUN-2011	GGCGTTCGGCTCTACCATGCAGTCGAGCGGTAAGGCCCTTTCGGGGGTACACGAGCGGCGAACGGGTGAGTAACACGTGGGTGACCTGCCCTCCACTCTGGGATAAGCCTGGGAAACTGGGTCTAATACCGGATAGGACCATTGATCGCATGGTTGGTGGTGGAAAGTTTTTTCGGTGGGGGATGGGCCCGCGGCCTATCAGCTTGTTGGTGGGGTGATGGCCTACCAAGGCGGTGACGGGTAGCCGGCCTGAGAGGGCGACCGGCCACACTGGGACTGAGACACGGCCCAGACTCCTACGGGAGGCAGCAGTGGGGAATATTGCGCAATGGGCGGAAGCCTGACGCAGCGACGCCGCGTGGGGGATGACGGCCTTCGGGTTGTAAACCTCTTTCGCCA…	27F 1525R
ZXY034	JN049483	Zhang et al., 2013	Subergorgia suberosa		healthy		Sanya coral reef conservation (18°11′N, 109°25′E)				Actinobacteria	Actinobacteria	Micrococcales	Microbacteriaceae	Agrococcus	sp.	99	Custom media, see reference for details	02-JUN-2011	GCAATGCGGCTCTACCATGCAGTCGACGATGAGGAGGAGCTTGCTCCTCCGGATTAGTGGCGAACGGGTGAGTAACACGTGAGCAATGTGCCCTTGACTCTGGAATAAGCGCTGGAAACGGCGTCTAATACCGGATACGACCCTCGGAGGCATCTCCAGGGGGTGGAAAGAACTTCGGTCAAGGATCAGCTCACGGCCTATCAGTTAGTTGGTGAGGTAACGGCTCACCAAGACGACGACGGGTAGCCGGCCTGAGAGGGTGACCGGCCACACTGGGACTGAGACACGGCCCAGACTCCTACGGGAGGCAGCAGTGGGGAATATTGCACAATGGGCGCAAGCCTGATGCAGCAACGCCGCGTGAGGGACGACGGCCTTCGGGTTGTAAACCTCTTTTAG…	27F 1525R
ZXY035	JN049484	Zhang et al., 2013	Subergorgia suberosa		healthy		Sanya coral reef conservation (18°11′N, 109°25′E)				Actinobacteria	Actinobacteria	Pseudonocardiales	Pseudonocardiaceae	Saccharopolyspora	sp.	99	Custom media, see reference for details	02-JUN-2011	GGCATTTCGGCTCTACCATGCAGTCGACGCTGAGCATCTTCGGGTGTGGATGAGTGGCGAACGGGTGAGTAACACGTGGGCAATCTGCCCTGCACTCTGGGATAAGCCTTGGAAACGGGGTCTAATACCGGATATGACGCATGGAGGCATCTTCGTGTGTGGAAAGTTCCGGCGGTGCAGGATGAGCCCGCGGCCTATCAGCTTGTTGGTGGGGTAGTGGCCTACCAAGGCGACGACGGGTAGCCGGCCTGAGAGGGTGACCGGCCACACTGGGACTGAGACACGGCCCAGACTCCTACGGGAGGCAGCAGTGGGGAATCTTGCGCAATGGGCGAAAGCCTGACGCAGCAACGCCGCGTGGGGGATGACGGCCTTCGGGTTGTAAACCTCTTTCGACAT…	27F 1525R
ZXY036	JN049485	Zhang et al., 2013	Subergorgia suberosa		healthy		Sanya coral reef conservation (18°11′N, 109°25′E)				Actinobacteria	Actinobacteria	Corynebacteriales	Nocardiaceae	Nocardia	sp.	99	Custom media, see reference for details	02-JUN-2011	TTTCAGGGGGGCTCTACCATGCAGTCGAGCGGTAGGCCCTTCGGGGTACACGAGCGGCGAACGGGTGAGTAACACGTGGGTGATCTGCCTTGCACTCTGGGATAAGCCTGGGAAACTGGGTCTAATACCGGATATGACCTTCGGCTTCCTGGTCGTTGGTGGAAAGATTTATCGGTGCAAGATGAGCCCGCGGCCTATCAGCTTGTTGGTGGGGTAATGGCCTACCAAGGCGACGACGGGTAGCCGGCCTGAGAGGGCGACCGGCCACACTGGGACTGAGACACGGCCCAGACTCCTACGGGAGGCAGCAGTGGGGAATATTGCACAATGGGCGGAAGCCTGATGCAGCGACGCCGCGTGAGGGATGACGGCCTTCGGGTTGTAAACCTCTTTCGACTC…	27F 1525R
ZXY037	JN049486	Zhang et al., 2013	Subergorgia suberosa		healthy		Sanya coral reef conservation (18°11′N, 109°25′E)				Actinobacteria	Actinobacteria	Micromonosporales	Micromonosporaceae	Verrucosispora	sp.	99	Custom media, see reference for details	02-JUN-2011	CTTACCATGCAGTCGAGCGGAAGGCCCTTCGGGGTACTCGAGCGGCGAACGGGTGAGTAACACGTGAGCAACCTGCCCTAGGCTTTGGGATAACCCTCGGAAACGGGGGCTAATACCGAATATTCACTCATGGGCGCATGTTTGTGGGTGGAAAGTTTTTCGGCTTGGGATGGGCTCGCGGCCTATCAGCTTGTTGGTGGGGTAATGGCCTACCAAGGCGACGACGGGTAGCCGGCCTGAGAGGGCGACCGGCCACACTGGGACTGAGACACGGCCCAGACTCCTACGGGAGGCAGCAGTGGGGAATATTGCACAATGGGCGGAAGCCTGATGCAGCGACGCCGCGTGAGGGATGACGGCCTTCGGGTTGTAAACCTCTTTCAGCAGGGACGAAGCGCA…	27F 1525R
ZXY038	JN049487	Zhang et al., 2013	Antipathes sp.		healthy		Sanya coral reef conservation (18°11′N, 109°25′E)				Actinobacteria	Actinobacteria	Pseudonocardiales	Pseudonocardiaceae	Saccharomonospora	sp.	99	Custom media, see reference for details	02-JUN-2011	GCGTTGTTTCCATCGCTCTACCATGCAGTCGACGCTGAGCTCAGCTTGCTGGGTGGATGAGTGGCGAACGGGTGAGTAACACGTGGGTAATCTGCCCTGTACTCTGGGATAAGCCTGGGAAACTGGGTCTAATACCGGATAGGACACATCACCGCATGGTGGTGTGTGGAAAGTTCCGGCGGTACAGGTTGAGCCCGCGGCCTATCAGCTTGTTGGTGGGGTGATGGCCTACCAAGGCGACGACGGGTAGCCGGCCTGAGAGGGTGACCGGCCACACTGGGACTGAGACACGGCCCAGACTCCTACGGGAGGCAGCAGTGGGGAATATTGCACAATGGGCGCAAGCCTGATGCAGCGACGCCGCGTGGGGGATGACGGCCTTCGGGTTGTAAACCCCTT…	27F 1525R
ZXY039	JN049488	Zhang et al., 2013	Antipathes sp.		healthy		Sanya coral reef conservation (18°11′N, 109°25′E)				Actinobacteria	Actinobacteria	Streptomycetales	Streptomycetaceae	Streptomyces	sp.	99	Custom media, see reference for details	02-JUN-2011	CGCTCTACCATGCAGTCGACGATGAACCGGTTTCGGCCGGGGATTAGTGGCGAACGGGTGAGTAACACGTGGGCAATCTGCCCTGCACTCTGGGATAAGCCCGGGAAACTGGGTCTAATACCGGATACGACACATGAGCGCATGCTCGTGTGTGGAAAGTTCCGGCGGTGCAGGATGAGCCCGCGGCCTATCAGTTTGTTGGTGGGGTAGTGGCCTACCAAGACGACGACGGGTAGCCGGCCTGAGAGGGTGACCGGCCACACTGGGACTGAGACACGGCCCAGACTCCTACGGGAGGCAGCAGTGGGGAATATTGCACAATGGGCGAAAGCCTGATGCAGCGACGCCGCGTGAGGGATGACGGCCTTCGGGTTGTAAACCTCTTTCAGCAGGGAAGAA…	27F 1525R
ZXY040	JN049489	Zhang et al., 2013	Antipathes sp.		healthy		Sanya coral reef conservation (18°11′N, 109°25′E)				Actinobacteria	Actinobacteria	Micromonosporales	Micromonosporaceae	Micromonospora	sp.	99	Custom media, see reference for details	02-JUN-2011	CGGGGCGATGCCGCGTCTTACCATGCAGTCGAGCGGAAGGCCCTTCGGGGTACTCGAGCGGCGAACGGGTGAGTAACACGTGAGCAACCTGCCCCAGGCTTTGGGATAACCCCGGGAAACCGGGGCTAATACCGAATATGACCTCTGACCGCATGGTTGGTGGTGGAAAGTTTTTCGGCTTGGGATGGGCTCGCGGCCTATCAGCTTGTTGGTGGGGTGATGGCCTACCAAGGCGACGACGGGTAGCCGGCCTGAGAGGGCGACCGGCCACACTGGGACTGAGACACGGCCCAGACTCCTACGGGAGGCAGCAGTGGGGAATATTGCACAATGGGCGGAAGCCTGATGCAGCGACGCCGCGTGAGGGATGACGGCCTTCGGGTTGTAAACCTCTTTCAG…	27F 1525R
ZXY041	JN049490	Zhang et al., 2013	Antipathes sp.		healthy		Sanya coral reef conservation (18°11′N, 109°25′E)				Actinobacteria	Actinobacteria	Micromonosporales	Micromonosporaceae	Micromonospora	sp.	99	Custom media, see reference for details	02-JUN-2011	GTGCAGTCGGGTCTACCATGCAGTCGAGCGGAAGGCCCTTCGGGGTACTCGAGCGGCGAACGGGTGAGTAACACGTGAGCAACCTGCCCCAAGCTTTGGGATAACCCTCGGAAACGGGGGCTAATACCGAATAGGACTGCTGGCCGCATGGCTGGTGGTGGAAAGTTTTTCGGCTTGGGATGGGCTCGCGGCCTATCAGCTTGTTGGTGGGGTGATGGCCTACCAAGGCGACGACGGGTAGCCGGCCTGAGAGGGCGACCGGCCACACTGGGACTGAGACACGGCCCAGACTCCTACGGGAGGCAGCAGTGGGGAATATTGCACAATGGGCGGAAGCCTGATGCAGCGACGCCGCGTGAGGGATGACGGCCTTCGGGTTGTAAACCTCTTTCAGCAGGG…	27F 1525R
ZXY042	JN049491	Zhang et al., 2013	Antipathes sp.		healthy		Sanya coral reef conservation (18°11′N, 109°25′E)				Actinobacteria	Actinobacteria	Micromonosporales	Micromonosporaceae	Micromonospora	sp.	99	Custom media, see reference for details	02-JUN-2011	GGCCAGTCGGGTCTTACCATGCAGTCGAGCGGAAGGCCCTTCGGGGTACTCGAGCGGCGAACGGGTGAGTAACACGTGAGCAACCTGCCCCAGGCTTTGGGATAACCCCGGGAAACCGGGGCTAATACCGAATATGACCTCCGATCGCATGGTTGGTGGTGGAAAGTTTTTCGGCTTGGGATGGGCTCGCGGCCTATCAGCTTGTTGGTGGGGTGATGGCCTACCAAGGCGACGACGGGTAGCCGGCCTGAGAGGGCGACCGGCCACACTGGGACTGAGACACGGCCCAGACTCCTACGGGAGGCAGCAGTGGGGAATATTGCACAATGGGCGGAAGCCTGATGCAGCGACGCCGCGTGAGGGATGACGGCCTTCGGGTTGTAAACCTCTTTCAGCAGG…	27F 1525R
ZXY043	JN049492	Zhang et al., 2013	Echinogorgia aurantiaca		healthy		Sanya coral reef conservation (18°11′N, 109°25′E)				Actinobacteria	Actinobacteria	Micromonosporales	Micromonosporaceae	Micromonospora	sp.	99	Custom media, see reference for details	02-JUN-2011	TTTCGGCGGGGGCTCTTACCATGCAGTCGAGCGGAAGGCCCTTCGGGGTACTCGAGCGGCGAACGGGTGAGTAACACGTGAGCAACCTGCCCTAGGCTTTGGGATAACCCTCGGAAACGGGGGCTAATACCGAATACGACCTTCTGCCGCATGGTGGGGGGTGGAAAGTTTTTCGGCCTGGGATGGGCTCGCGGCCTATCAGCTTGTTGGTGGGGTGATGGCCTACCAAGGCGACGACGGGTAGCCGGCCTGAGAGGGCGACCGGCCACACTGGGACTGAGACACGGCCCAGACTCCTACGGGAGGCAGCAGTGGGGAATATTGCACAATGGGCGGAAGCCTGATGCAGCGACGCCGCGTGAGGGATGACGGCCTTCGGGTTGTAAACCTCTTTCAGCA…	27F 1525R
ZXY044	JN049493	Zhang et al., 2013	Echinogorgia aurantiaca		healthy		Sanya coral reef conservation (18°11′N, 109°25′E)				Actinobacteria	Actinobacteria	Micromonosporales	Micromonosporaceae	Verrucosispora	sp.	99	Custom media, see reference for details	02-JUN-2011	GCAGTTGCGCCTCTTACCATGCAGTCGAGCGGAAGGCCCTTCGGGGTACTCGAGCGGCGAACGGGTGAGTAACACGTGAGCAACCTGCCCTAGGCTTTGGGATAACCCTCGGAAACGGGGGCTAATACCGAATATTCACTCATGGGCGCATGTTTGTGGGTGGAAAGTTTTTCGGCTTGGGATGGGCTCGCGGCCTATCAGCTTGTTGGTGGGGTAATGGCCTACCAAGGCGACGACGGGTAGCCGGCCTGAGAGGGCGACCGGCCACACTGGGACTGAGACACGGCCCAGACTCCTACGGGAGGCAGCAGTGGGGAATATTGCACAATGGGCGGAAGCCTGATGCAGCGACGCCGCGTGAGGGATGACGGCCTTCGGGTTGTAAACCTCTTTCAGCAG…	27F 1525R
4746K6-B20	HQ640815	Galkiewicz et al., 2011	Lophelia pertusa				northeastern Gulf of Mexico - Viosca Knoll 826 (VK 826)				Actinobacteria	Actinobacteria	Micrococcales	Micrococcaceae	Kocuria	sp.	99	glycerol artificial seawater agar (GASWA)	18-NOV-2010	CTAACACATGCAAGTCGAACGCTGAAGCTTGGGTGTTTACATCTGGGTGGATGAGTGGCGAACGGGTGAGTAATACGTGAGTAACCTGCCCTTGACTCTGGGATAAGCCTGGGAAACTGGGTCTAATACTGGATACTACACATTCTCGCATGGGGGTGTGTGGAAAGGGTTTTACTGGTTTTGGATGGGCTCACGGCCTATCAGCTTGTTGGTGGGGTAATGGCCTACCAAGGCGACGACGGGTAGCCGGCCTGAGAGGGTGACCGGCCACACTGGGACTGAGACACGGCCCAGACTCCTACGGGAGGCAGCAGTGGGGAATATTGCACAATGGGCGAAAGCCTGATGCAGCGACGCCGCGTGAGGGATGACGGCCTTCGGGTTGTAAACCTCTTTCAG…	Eco8F 1492R
1S	JF792066	Cardenas, et al., 2012	Diploria strigosa and Siderastrea siderea	15		28	reef off Aguja Island (11°18′57″N, 74°11′41″W) in the Tayrona National Park, Colombia		28	https://www.nature.com/articles/ismej2011123#materials-and-methods	Actinobacteria	Actinobacteria	Micrococcales	Micrococcaceae	Microbacterium	sp.	99	Luria Bertani and Marine agar	06-MAR-2011	CTTGCTCTGTGGGATCAGTGGCGAACGGGTGAGTAACACGTGAGCAACCTGCCCCTGACTCTGGGATAAGCGCTGGAAACGGCGTCTAATACTGGATATGTGACGTGACCGCATGGTCTGCGTCTGGAAAGAATTTCGGTTGGGGATGGGCTCGCGGCCTATCAGCTTGTTGGTGAGGTAATGGCTCACCAAGGCGTCGACGGGTAGCCGGCCTGAGAGGGTGACCGGCCACACTGGGACTGAGACACGGCCCAGACTCCTACGGGAGGCAGCAGTGGGGAATATTGCACAATGGGCGCAAGCCTGATGCAGCAACGCCGCGTGAGGGACGACGGCCTTCGGGTTGTAAACCTCTTTTAGCAGGGAAGAAGCGAAAGTGACGGTACCTGCAGAAAAAGC…	27F 1492R	https://www.nature.com/articles/ismej2011123#materials-and-methods
9D	JF792072	Cardenas, et al., 2012	Diploria strigosa and Siderastrea siderea	15		28	reef off Aguja Island (11°18′57″N, 74°11′41″W) in the Tayrona National Park, Colombia		28		Actinobacteria	Actinobacteria	Micrococcales	Micrococcaceae	Micrococcus	sp.	100	Luria Bertani and Marine agar	06-MAR-2011	GATGAAGCCCAGCTTGCTGGGTGGATTAGTGGCGAACGGGTGAGTAACACGTGAGTAACCTGCCCTTAACTCTGGGATAAGCCTGGGAAACTGGGTCTAATACCGGATAGGAGCGTCCACCGCATGGTGGGTGTTGGAAAGATTTATCGGTTTTGGATGGACTCGCGGCCTATCAGCTTGTTGGTGAGGTAATGGCTCACCAAGGCGACGACGGGTAGCCGGCCTGAGAGGGTGACCGGCCACACTGGGACTGAGACACGGCCCAGACTCCTACGGGAGGCAGCAGTGGGGAATATTGCACAATGGGCGAAAGCCTGATGCAGCGACGCCGCGTGAGGGATGACGGCCTTCGGGTTGTAAACCTCTTTCAGTAGGGAAGAAGCGAAAGTGACGGTACCT…	27F 1492R
12D	JF792076	Cardenas, et al., 2012	Diploria strigosa and Siderastrea siderea	15		28	reef off Aguja Island (11°18′57″N, 74°11′41″W) in the Tayrona National Park, Colombia		28		Actinobacteria	Actinobacteria	Streptosporangiales	Nocardiopsaceae	Nocardiopsis	sp.	98	Luria Bertani and Marine agar	06-MAR-2011	CGGTAAGGCCCTTCGGGGTACACGAGCGGCGAACGGGTGAGTAACACGTGAGCAACCTGCCCCTGACTCTGGGATAAGCGGTGGAAACGCCGTCTAATACCGGATACGACCTTCCGCCTCATGGTGGAGGGTGGAAAGTTTTTTCGGNCAGGRWKGGGNTCGNGGCCTATCAGCTNGTTGGNGGGGTAACGGCCTACCAAGGCNATTACGGGTAGCCGGCCTGANAGGGCGACCGGCCACNCTGGGACTGANACACGGCCCANACTCCTGCGGGAGGCAGCAGTGGGGAATATTGCGCAATGGGCGAAAGCCTGACNCANCGACNCCNCGNGGGGGATGACGGCCTTCGGGTTGTAAACCTCTTTTACCACCAACGCAGGCTCCGGGTTCTCTCGGGGT…	27F 1492R
15D	JF792081	Cardenas, et al., 2012	Diploria strigosa and Siderastrea siderea	15		28	reef off Aguja Island (11°18′57″N, 74°11′41″W) in the Tayrona National Park, Colombia		28		Actinobacteria	Actinobacteria	Micrococcales	Brevibacteriaceae	Brevibacterium	sp.	99	Luria Bertani and Marine agar	06-MAR-2011	CTCNNARCTTGCTGTGGGTGGATGAGTGGCGAACGGGTGAGTAACACGTGAGTAACCTGCCCCTGATTTCGGGATAAGCCTGGGAAACTGGGTCTAATACCGGATATGACCACCGGCCGCATGGTTGGTGGTGGAAAGTTTTTCGATCGGGGATGGGCTCGCGGCCTATCAGCTTGTTGGTGGGGTAATGGCCTACCAAGGCGACGACGGGTAGCCGGCCTGAGAGGGCGACCGGCCACACTGGGACTGAGACACGGCCCAGACTCCTACGGGAGGCAGCAGTGGGGAATATTGCACAATGGGGGAAACCCTGATGCAGCGACGCAGCGTGCGGGATGACGGCCTTCGGGTTGTAAACCGCTTTCAGCAGGGAAGAAGCGAAAGTGACGGTACCTGCAG…	27F 1492R
17D	JF792083	Cardenas, et al., 2012	Diploria strigosa and Siderastrea siderea	15		28	reef off Aguja Island (11°18′57″N, 74°11′41″W) in the Tayrona National Park, Colombia		28		Actinobacteria	Actinobacteria	Micrococcales	Micrococcaceae	Micrococcus	sp.	100	Luria Bertani and Marine agar	06-MAR-2011	GCTGGGTGGATTAGTGGCGAACGGGTGAGTAACACGTGAGTAACCTGCCCTTAACTCTGGGATAAGCCTGGGAAACTGGGTCTAATACCGGATAGGAGCGTCCACCGCATGGTGGGTGTTGGAAAGATTTATCGGTTTTGGATGGACTCGCGGCCTATCAGCTTGTTGGTGAGGTAATGGCTCACCAAGGCGACGACGGGTAGCCGGCCTGAGAGGGTGACCGGCCACACTGGGACTGAGACACGGCCCAGACTCCTACGGGAGGCAGCAGTGGGGAATATTGCACAATGGGCGAAAGCCTGATGCAGCGACGCCGCGTGAGGGATGACGGCCTTCGGGTTGTAAACCTCTTTCAGTAGGGAAGAAGCGAAAGTGACGGTACCTGCAGAAGAAGCACCG…	27F 1492R
21A	JF792087	Cardenas, et al., 2012	Diploria strigosa and Siderastrea siderea	15		28	reef off Aguja Island (11°18′57″N, 74°11′41″W) in the Tayrona National Park, Colombia		28		Actinobacteria	Actinobacteria	Micrococcales	Micrococcaceae	Microbacterium	sp.	99	Luria Bertani and Marine agar	06-MAR-2011	AGTCGAACGATGAAGCTGGAGCTTGCTCTGGTGGATTAGTGGCGAACGGGTGAGTAACACGTGAGCAACCTGCCCCTGACTCTGGGATAAGCGCTGGAAACGGTGTCTAATACTGGATATGTCCCATCACCGCATGGTGTGTGGGTGGAAAGATTTTTCGGTTGGGGATGGGCTCGCGGCCTATCAGCTTGTTGGTGAGGTAATGGCTCACCAAGGCGTCGACGGGTAGCCGGCCTGAGAGGGTGACCGGCCACACTGGGACTGAGACACGGCCCAGACTCCTACGGGAGGCAGCAGTGGGGAATATTGCACAATGGGCGGAAGCCTGATGCAGCAACGCCGCGTGAGGGATGACGGCCTTCGGGTTGTAAACCTCTTTTAGCAGGGAAGAAGCGAGAG…	27F 1492R
33A	JF792091	Cardenas, et al., 2012	Diploria strigosa and Siderastrea siderea	15		28	reef off Aguja Island (11°18′57″N, 74°11′41″W) in the Tayrona National Park, Colombia		28		Actinobacteria	Actinobacteria	Micrococcales	Brevibacteriaceae	Brevibacterium	sp.	98	Luria Bertani and Marine agar	06-MAR-2011	ACGTGAGTAACCTGCCCCTGATTTCGGGATAAGCCNGGGAAACCGGGTCTAATACCGGATACNACCATCCCTCGCATGAGGGTTGGNGGAAAGTTTTTCNATCGGGGATGGGCTCGCGGCCTATCAGCTTGTTGGTGGGGTAANGGCCTACCAAGGCNACNACGGGTAGCCGGCCTGANAGGGCGACCGGCCNCACTGGGACTGANACACGGCCCANACTCCTACGGGAGGCAGCAGKGGGGAATATTGCACAANGGGGGAAACCCTGATGCAGCGACGCANCGNGCGGGATGACGGCCTTCGGGTTGTAAACCGCTTTCANCAGGGAANAAGCGAAAGNGACGGTACCTGCANAANAANTACCGGNTAACTACGTGCCAGCANCCNCGGTAATACNTA…	27F 1492R
37A	JF792093	Cardenas, et al., 2012	Diploria strigosa and Siderastrea siderea	15		28	reef off Aguja Island (11°18′57″N, 74°11′41″W) in the Tayrona National Park, Colombia		28		Actinobacteria	Actinobacteria	Micrococcales	Microbacteriaceae	Leucobacter	sp.	100	Luria Bertani and Marine agar	06-MAR-2011	TGCAGTCGAACGATGAAGCCCAGCTTGCTGGGTGGAAGAGTGGCGAACGGGTGAGTAACACGTGAGTAACCTGCCCTGAACTCTGGGATAAGCACTGGAAACGGTGTCTAATACTGGATACGACCTATCACCGCATGGTGTGTGGGTGGAAAGATTTATCGGTTCTGGATGGACTCGCGGCCTATCAGCTAGATGGTGAGGTAATGGCTCACCATGGCGACGACGGGTAGCCGGCCTGAGAGGGTGACCGGCCACACTGGGACTGAGACACGGCCCAGACTCCTACGGGAGGCAGCAGTGGGGAATATTGCACAATGGGCGCAAGCCTGATGCAGCAACGCCGCGTGAGGGATGACGGCCTTCGGGTTGTAAACCTCTTTTAGTAGGGAAGAAGCGAAA…	27F 1492R
Mcap_H17	KP640583	Shore-Maggio, et al., 2015	Montipora capitatam	1 to 3	healthy		reef from Moku O Loe, Kaneohe Bay, Oahu, HI	whole fragment	28		Actinobacteria	Actinobacteria	Micrococcales	Micrococcaceae	Kocuria	sp.	100	glycerol artificial seawater agar (GASWA)	12-JAN-2015	AGAGTTTGATCCTGGCTCGGACGAACGCTGGCGGCGTGCTTAACACATGCAAGTCGAACGATGATCTCCCGCTTGCGGGAGTGATTAGTGGCGAACGGGTGAGTAATACGTGAGTAACCTGCCCTTGACTCTGGGATAAGCCTGGGAAACCGGGTCTAATACTGGATACGACTCCTCATCGCATGGTGGGGGGTGGAAAGGGTTTGACTGGTTTTGGATGGGCTCACGGCCTATCAGCTTGTTGGTGGGGTAATGGCTCACCAAGGCGACGACGGGTAGCCGGCCTGAGAGGGTGACCGGCCACACTGGGACTGAGACACGGCCCAGACTCCTACGGGAGGCAGCAGTGGGGAATATTGCACAATGGGCGCAAGCCTGATGCAGCGACGCCGCGTGAGG…	8F 1513R
Mcap_H18	KP640586	Shore-Maggio, et al., 2015	Montipora capitatam	1 to 3	healthy		reef from Moku O Loe, Kaneohe Bay, Oahu, HI	whole fragment	28		Actinobacteria	Actinobacteria	Micrococcales	Micrococcaceae	Micrococcus	sp.	100	glycerol artificial seawater agar (GASWA)	12-JAN-2015	TCGAACGATGAAGCCCAGCTTGCTGTAGTGGATATAGTGGCGAACGGGTGAGTAACACGTGAGTAACCTGCCCTTAACTCTGGGATAAGCCTGGGAAACTGGGTCTAATACCGGATAGGAGCGCCTACCGCATGGTGGGTGTTGGAAAGATTTATCGGTTTTGGATGGACTCGCGGCCTATCAGCTTGTTGGTGAGGTAATGGCTCACCAAGGCGACGACGGGTAGCCGGCCTGAGAGGGTGACCGGCCACACTGGGACTGAGACACGGCCCAGACTCCTACGGGAGGCAGCAGTGGGGAATATTGCACAATGGGCGCAAGCCTGATGCAGCGACGCCGCGTGAGGGATGACGGCCTTCGGGTTGTAAACCTCTTTCAGTAGGGAAGAAGCGAAAGTGA…	8F 1513R
C-1-31	KT583401	Pham et al., 2015	Alcyonium digitatum	23–30			Kattegat, Baltic Sea (Germany)-site Baltic 1 (57°00.773N–11°34.835E), site Baltic 2 (56°58.805N–11°35.166E), and site Baltic 3 (56°42.041N–11°44.185E)		28 and 10		Actinobacteria	Actinobacteria	Geodermatophilales	Geodermatophilaceae	Blastococcus	sp.	99	Custom media, see reference for details	24-AUG-2015	AGAGTTTGATCATGGCTCAGGACGAACGCTGGCGGCGTGCTTAACACATGCAAGTCGAACGGTGAACCTGCTTCGGTGGGGGATCAGTGGCGAACGGGTGAGTAACACGTGGGCAACCTGCCCTCAGCTCTGGGATAACTCCAAGAAATTGGGGCTAATACCGGATATGACCGCTGACCGCATGGTCTGGTGGTGGAAAGATTTATCGGCTGGGGATGGGCCCGCGGCCTATCAGCTTGTTGGTGGGGTAGTGGCCTACCAAGGCGACGACGGGTAGCCGGCCTGAGAGGGTGACCGGCCACACTGGGACTGAGACACGGCCCAGACTCCTACGGGAGGCAGCAGTGGGGAATATTGCGCAATGGGCGAAAGCCTGACGCAGCGACGCCGCGTGGGGGA…	27f 1492r/1525r
A-2-7	KT583408	Pham et al., 2015	Alcyonium digitatum	23–30			Kattegat, Baltic Sea (Germany)-site Baltic 1 (57°00.773N–11°34.835E), site Baltic 2 (56°58.805N–11°35.166E), and site Baltic 3 (56°42.041N–11°44.185E)		28 and 10		Actinobacteria	Actinobacteria	Micrococcales	Micrococcaceae	Micrococcus	sp.	99	Custom media, see reference for details	24-AUG-2015	AGAGTTTGATCATGGCTCAGGATGAACGCTGGCGGCGTGCTTAACACATGCAAGTCGAACGATGAAGCCCAGCTTGCTGGGTGGATTAGTGGCGAACGGGTGAGTAACACGTGAGTAACCTGCCCTTAACTCTGGGATAAGCCTGGGAAACTGGGTCTAATACCGGATAGGAGCGTCCACCGCATGGTGGGTGTTGGAAAGATTTATCGGTTTTGGATGGACTCGCGGCCTATCAGCTTGTTGGTGAGGTAATGGCTCACCAAGGCGACGACGGGTAGCCGGCCTGAGAGGGTGACCGGCCACACTGGGACTGAGACACGGCCCAGACTCCTACGGGAGGCAGCAGTGGGGAATATTGCACAATGGGCGCAAGCCTGATGCAGCGACGCCGCGTGAGGG…	27f 1492r/1525r
A-2-19A	KT583419	Pham et al., 2015	Alcyonium digitatum	23–30			Kattegat, Baltic Sea (Germany)-site Baltic 1 (57°00.773N–11°34.835E), site Baltic 2 (56°58.805N–11°35.166E), and site Baltic 3 (56°42.041N–11°44.185E)		28 and 10		Actinobacteria	Actinobacteria	Micrococcales	Micrococcaceae	Micrococcus	sp.	99	Custom media, see reference for details	24-AUG-2015	TGGATGACGGCCTTCGGGTTGAAACCTCTTTAGCAGGGAAGAAGCGAAAGTGACGGTACCTGAGAAGAAGCACCGGCTAACTACGTGCCAGCAGCCGCGGTAATACGTAGGGTGCCGAGCGTTATCCGGAATTATTGGGCGTAAAGAGCTCGTAGGCGGTTTGTCGCGTCTGTCGTGAAAGTCCGGGGCTTAACCCCGGATCTGCGGTGGGTACGGGCAGACTAGAGTGCAGTAGGGGAGACTGGAATTCCTGGTGTAGCGGTGGAATGCGCAGATATCAGGAGGAACACCGATGGCGAAGGCAGGTCTCTGGGCTGTAACTGACGCTGAGGAGCGAAAGCATGGGGAGCGAACAGGATTAGATACCCTGGTAGTCCATGCCGTAAACGTTGGGCACTA…	27f 1492r/1525r
A-2-19B	KT583420	Pham et al., 2015	Alcyonium digitatum	23–30			Kattegat, Baltic Sea (Germany)-site Baltic 1 (57°00.773N–11°34.835E), site Baltic 2 (56°58.805N–11°35.166E), and site Baltic 3 (56°42.041N–11°44.185E)		28 and 10		Actinobacteria	Actinobacteria	Micrococcales	Micrococcaceae	Micrococcus	sp.	99	Custom media, see reference for details	24-AUG-2015	GAGTTTGATCMTGGCTCAGGATGAACGCTGGCGGCGTGCTTAACACATGCAAGTCGAACGATGAAGCCCAGCTTGCTGGGTGGATTAGTGGCGAACGGGTGAGTAACACGTGAGTAACCTGCCCTTGACTCTGGGATAAGCCCGGGAAACTGGGTCTAATACCGGATAGGAGCGCCTGTCGCATGACGGGTGTTGGAAAGATTTTTCGGTCATGGATGGACTCGCGGCCTATCAGCTTGTTGGTGAGGTAATGGCTCACCAAGGCGACGACGGGTAGCCGGCCTGAGAGGGTGACCGGCCACACTGGGACTGAGACACGGCCCAGACTCCTACGGGAGGCAGCAGTGGGGAATATTGCACAATGGGCGGAAGCCTGATGCAGCGACGCCGCGTGAGGGA…	27f 1492r/1525r
A-2-28	KT583428	Pham et al., 2015	Alcyonium digitatum	23–30			Kattegat, Baltic Sea (Germany)-site Baltic 1 (57°00.773N–11°34.835E), site Baltic 2 (56°58.805N–11°35.166E), and site Baltic 3 (56°42.041N–11°44.185E)		28 and 10		Actinobacteria	Actinobacteria	Micrococcales	Micrococcaceae	Micrococcus	sp.	99	Custom media, see reference for details	24-AUG-2015	GAGTTTGATCATGGCTCAGGATGAACGCTGGCGGCGTGCTTAACACATGCAAGTCGAACGATGAAGCCCAGCTTGCTGGGTGGATTAGTGGCGAACGGGTGAGTAACACGTGAGTAACCTGCCCTTGACTCTGGGATAAGCCCGGGAAACTGGGTCTAATACCGGATAGGAGCGCCTGTCGCATGACGGGTGTTGGAAAGATTTTTCGGTCATGGATGGACTCGCGGCCTATCAGCTTGTTGGTGAGGTAATGGCTCACCAAGGCGACGACGGGTAGCCGGCCTGAGAGGGTGACCGGCCACACTGGGACTGAGACACGGCCCAGACTCCTACGGGAGGCAGCAGTGGGGAATATTGCACAATGGGCGGAAGCCTGATGCAGCGACGCCGCGTGAGGGA…	27f 1492r/1525r
C-2-27	KT583473	Pham et al., 2015	Alcyonium digitatum	23–30			Kattegat, Baltic Sea (Germany)-site Baltic 1 (57°00.773N–11°34.835E), site Baltic 2 (56°58.805N–11°35.166E), and site Baltic 3 (56°42.041N–11°44.185E)		28 and 10		Actinobacteria	Actinobacteria	Micrococcales	Micrococcaceae	Micrococcus	sp.	99	Custom media, see reference for details	24-AUG-2015	TAGAGTTTGATCATGGCTCAGGATGAACGCTGGCGGCGTGCTTAACACATGCAAGTCGAACGATGAAGCCCAGCTTGCTGGGTGGATTAGTGGCGAACGGGTGAGTAACACGTGAGTAACCTGCCCTTAACTCTGGGATAAGCCTGGGAAACTGGGTCTAATACCGGATAGGAGCGTCCACCGCATGGTGGGTGTTGGAAAGATTTATCGGTTTTGGATGGACTCGCGGCCTATCAGCTTGTTGGTGAGGTAATGGCTCACCAAGGCGACGACGGGTAGCCGGCCTGAGAGGGTGACCGGCCACACTGGGACTGAGACACGGCCCAGACTCCTACGGGAGGCAGCAGTGGGGAATATTGCACAATGGGCGCAAGCCTGATGCAGCGACGCCGCGTGAGG…	27f 1492r/1525r
C-2-28	KT583474	Pham et al., 2015	Alcyonium digitatum	23–30			Kattegat, Baltic Sea (Germany)-site Baltic 1 (57°00.773N–11°34.835E), site Baltic 2 (56°58.805N–11°35.166E), and site Baltic 3 (56°42.041N–11°44.185E)		28 and 10		Actinobacteria	Actinobacteria	Micrococcales	Micrococcaceae	Micrococcus	sp.	99	Custom media, see reference for details	24-AUG-2015	AGAGTTTGATCATGGCTCAGGATGAACGCTGGCGGCGTGCTTAACACATGCAAGTCGAACGATGAAGCCCAGCTTGCTGGGTGGATTAGTGGCGAACGGGTGAGTAACACGTGAGTAACCTGCCCTTAACTCTGGGATAAGCCTGGGAAACTGGGTCTAATACCGGATAGGAGCGTCCACCGCATGGTGGGTGTTGGAAAGATTTATCGGTTTTGGATGGACTCGCGGCCTATCAGCTTGTTGGTGAGGTAATGGCTCACCAAGGCGACGACGGGTAGCCGGCCTGAGAGGGTGACCGGCCACACTGGGACTGAGACACGGCCCAGACTCCTACGGGAGGCAGCAGTGGGGAATATTGCACAATGGGCGCAAGCCTGATGCAGCGACGCCGCGTGAGGG…	27f 1492r/1525r
M-201	HG965210	Vizcaino et al. 2015	deep-sea scleractinian coral (Fam. Caryophillidae)	1500			Avilés Canyon in the Cantabrian Sea, Asturias, Spain (P3 station, GPS coordinates 43° 38′ 58″ N 6° 30′ W)		28	http://ijs.microbiologyresearch.org/content/journal/ijsem/10.1099/ijs.0.000107#tab1	Actinobacteria	Actinobacteria	Micrococcales	Promicromonosporaceae	Myceligenerans	cantabricum	98	Custom media: 1/3 tryptic soy agar (TSA) and 1/6 M-BLEB agar	04-MAR-2014	GAGTTCGACTATGGCTCAGGAACAGTGCACCCAGCTTGCTGGGTGGATTAGTGGCAAACGGGTGAGTAACACGTGAGCAACCTGCCCCCCTCTTCGGGATAAGCCTTGGAAACGAGGTCTAATACCGGATATGAGTCATCGAGGCATCTCGGTGGTTGGAAAGATTTTTTGGTGGGGGATGGGCTCGCGGCCTATCAGCTTGTTGGTGGGGTGATGGCCTACCAAGGCGTCGACGGGTAGCCGGCCTGAGAGGGCGACCGGCCACACTGGGACTGAGACACGGCCCAGACTCCTACGGGAGGCAGCAGTGGGGAATATTGCACAATGGGCGAAAGCCTGATGCAGCGACGCCGCGTGAGGGATGACGGCCTTCGGGTTGTAAACCTCTTTCGACAAGGA…	P609D P1525R	http://ijs.microbiologyresearch.org/content/journal/ijsem/10.1099/ijs.0.000107#tab1
04PA2-Co5-61	AB286023	Kageyama et al;., 2007	Acropora gemmifera	3–5			Angauru Coral Garden in Palau (GPS location: N 6°53_x0001_33.0, E 134° 8_x0001_21.4)		25	https://www.jstage.jst.go.jp/article/jgam/53/3/53_3_185/_article/-char/ja/	Actinobacteria	Actinobacteria	Micrococcales	Intrasporangiaceae	Janibacter	corallicola	98	1/10 Marine agar +Ca	04-DEC-2006	ATCCTGGCTAAGGAAGAACGCTGGCGGCGTGCTTACCATGCGAGTCGAACGGTGAAGCTCCCAGCTTGCTGGGGGTGGATCAGTGGCGAACGGGTGAGTAACACGTGAGCAACCTGCCCCTGACTCTGGAATAAGCGCTGGAAACGGCGTCTAATACTGGATATGACACTGGCCCGCATGGGCATGGTGTGGAAAGTTTTTCGGTTGGGGATGGGCTCGCGGCCTATCAGCTTGTTGGTGAGGTAATGGCTTACCAAGGCGACGACGGGTAGCCGGCCTGAGAGGGCGACCGGCCACACTGGGACTGAGACACGGCCCAGACTCCTACGGGAGGCAGCAGTGGGGAATATTGCACAATGGGCGAAAGCCTGATGCAGCGACGCCGCGTGAGGGATGACG…	8–27f 1492–1510R	https://www.jstage.jst.go.jp/article/jgam/53/3/53_3_185/_article/-char/ja/
SCSIO 10427	JN006759	Li et al., 2012	Menella praelonga	6.5			south-western coastal waters of Weizhou Island, Guangxi province, China		28	https://ijs.microbiologyresearch.org/content/journal/ijsem/10.1099/ijs.0.035402-0	Actinobacteria	Actinobacteria	Streptosporangiales	Nocardiopsaceae	Nocardiopsis	coralliicola	99	trehalose-proline isolation medium	18-MAY-2011	GGCCCTTCGGGGTACACGAGCGGCGAACGGGTGAGTAACACGTGAGCAACCTGCCCCTGACTCTGGGATAAGCGGTGGAAACGCCGTCTAATACCGGATACGACCCGCCCCTGCCTGGGGTGCGGGTGGAAAGTTTTTTCGGTTGGGGATGGGCTCGCGGCCTATCAGCTTGTTGGTGGGGTAACGGCCTACCAAGGCGATTACGGGTAGCCGGCCTGAGAGGGCGACCGGCCACACTGGGACTGAGACACGGCCCAGACTCCTGCGGGAGGCAGCAGTGGGGAATCTTGCGCAATGGGCGAAAGCCTGACGCAGCGACGCCGCGTGGGGGATGACGGCCTTCGGGTTGTAAACCTCTTTTACCACTCACGCAGGCTCCGGGTTCTCCCGGGGTTGACG…	8-27f 1523-1504r	https://ijs.microbiologyresearch.org/content/journal/ijsem/10.1099/ijs.0.035402-0
3D705	JF411511	Chiu et al., 2012	skeletal tissue growth anomalies in the coral Platygyra carnosus				Hoi Ha Wan Marine Park (HHWMP) and Port Shelter (PS)		20		Actinobacteria	Actinobacteria	Micrococcales	Micrococcaceae	Rothia	sp.	99	Custom media: ASW + agar, peptone, yeast extract	15-FEB-2011	TCCATGCAAGTCGAACGATGAAGACTGGTGCTTGCACTGGTTGGATTAGTGGCGAACGGGTGAGTAATACGTGAGTAACCTGCCTTTGACTCTGGGATAAGCCTGGGAAACTGGGTCTAATACCGGATATGACAAGGAACCGCATGGTTTTTTGTGGAAAGGGTTTGTACTGGTTTTAGATGGGCTCACGGCCTATCAGCTTGTTGGTGGGGTAATGGCTCACCAAGGCGACGACGGGTAGCCGGCCTGAGAGGGTGACCGGCCACACTGGGACTGAGACACGGCCCAGACTCCTACGGGAGGCAGCAGTGGGGAATATTGCACAATGGGCGCAAGCCTGATGCAGCGACGCCGCGTGAGGGATGACGGCCTTCGGGTTGTAAACCTCTTTCAGCAGGG…	26F 785R, 355F 1055R, 927F 1492R
xen-2-10-08	FJ041099	Shnit-Orland & Kushmaro, 2009	mucus Xenia sp.	3–19			Inter-University Institute for Marine Science in the Gulf of Eilat (29°51′N, 34°94′E)		25		Actinobacteria	Actinobacteria	Micrococcales	Micrococcaceae			97	1/10, ½ marine agar	18-AUG-2008	ATTTTTGATGGACCCCAGGGCTAATTTTTAAGGTTCACACCCGTCGAACGATGAAGCCCAGCTTGCTGGGTTTTATTAGTGGCGAACGGGTGAGTAACACGTGAGTAACCTGCCCTTAACTCTGGGATAAGCCTGGGAAACTGGGTCTAATACCGGATAGGAGCGTCCACCGCATGGTGGGTGTTGGAAAGATTTATCGGTTTTGGATGGACTCGCGGCCTATCAGCTTGTTGGTGAGGTAATGGCTCACCAAGGCGACGACGGGTAGCCGGCCTGAGAGGGTTGACCGGCCACACTGGGAACTGAGACACGGCCCCGACCTCCTACGGGAGGCTATCAG	8F 1512R
fug-2-50-11	FJ041100	Shnit-Orland & Kushmaro, 2009	mucus Fungia granulosa	3–19			Inter-University Institute for Marine Science in the Gulf of Eilat (29°51′N, 34°94′E)		25		Actinobacteria	Actinobacteria	Micrococcales	Micrococcaceae			99	1/10, ½ marine agar	18-AUG-2008	GTCTGCTTAACACATGCAAGTCGAACGATGATCCGGTGCTTGCACCGGGGATTAGTGGCGAACGGGTGAGTAACACGTGAGTAACCTGCCCTTGACTCTGGGATAAGCCTGGGAAACTGGGTCTAATACCGGATATGACTCCTCATCGCATGGTGGGGGGTGGAAAGCTTTTGTGGTTTTGGATGGACTCGCGGCCTATCAGCTTGTTGGTGAGGTAATGGCTCACCAAGGCGACGACGGGTAGCCGGCCTGAGAGGGTGACCGGCCACACTGGGACTGAGACACGGCCCAGACTCCTACGGGAGGCAGCAGTGGGGAATATTGCACAATGGGCGCAAGCCTGATGCAGCGACGCCGCGTGAGGGATGACGGCCTTCGGGTTGTAAACCTCTTTCAGTA…	8F 1512R
fav-2-50-08	FJ041101	Shnit-Orland & Kushmaro, 2009	mucus Favia sp.	3–19			Inter-University Institute for Marine Science in the Gulf of Eilat (29°51′N, 34°94′E)		25		Actinobacteria	Actinobacteria	Micrococcales	Micrococcaceae			99	1/10, ½ marine agar	18-AUG-2008	AGTCGAACGATGAAGCCCAGCTTGCTGGGCGGATTAGTGGCGAACGGGTGAGTAACACGTGAGTAACCTGCCCTTGACTCTGGGATAAGCTCGGGAAACTGGGTCTAATACCGGATAGGAGCGTCTGTCGCATGACGGGTGCTGGAAAGATCTTTCGGTCATGGATGGACTCGCGGCCTATCAGCTTGTTGGTGAGGTAACGGCTCACCAAGGCGACGACGGGTAGCCGGCCTGAGAGGGTGACCGGCCACACTGGGACTGAGACACGGCCCAGACTCCTACGGGAGGCAGCAGTGGGGAATATTGCACAATGGGCGAAAGCCTGATGCAGCGACGCCGCGTGAGGGATGACGGCCTTCGGGTTGTAAACCTCTTTCAGCAGGGAAGAAGCGAAAGTGA…	8F 1512R
b1ca8	EF207065	Koren & Rosenberg, 2008	Oculina patagonica	1–3			Sedot Yam, in the Mediterranean Sea off the coast of Israel		30		Actinobacteria	Actinobacteria	Micrococcales	Brevibacteriaceae	Brevibacterium	sp.	99	Marine agar, Vibrio-specific thiosulfate–citrate–bile salts (TCBS)	04-JAN-2007	TTCCGCCCTTTAGTGGCTGCAGCTAACGCATTAAGCACTCCGCCTGGGGAGTACGGCCGCAAGGCTGAAACTCAAAGGAATTGACGGGGGCCCGCACAAGCGGTGGAGCATGTGGTTTAATTCGAAGCAACGCGAAGAACCTTACCAGGTCTTGACATCCTCTGACAACCCTAGAGATAGGGCTTTCCCCTTCGGGGGACAGAGTGACAGGTGGTGCATGGTTGTCGTCAGCTCGTGTCGTGAGATGTTGGGTTAAGTCCCGCAACGAGCGCAACCCTTGATCTTAGTTGCCAGCATTCAGTTGGGCACTCTAAGGTGACTGCCGGTGACAAACCGGAGGAAGGTGGGGATGACGTCAAATCATCATGCCCCTTATGACCTGGGCTACACACGTGCTAC…	8F 1492R
Coryn-1	FJ423600	Ben-Dov et al., 2009	mucus Fungia granulosa	10–15			Inter-University Institute for Marine Science, Eilat, Israel (29u 519 N 34u 949 E)		30	http://ijs.microbiologyresearch.org/content/journal/ijsem/10.1099/ijs.0.007468-0	Actinobacteria	Actinobacteria	Corynebacteriales	Corynebacteriaceae	Corynebacterium	maris	99	agar-sphere culturing technique/LB and Marine agar	28-OCT-2008	GATGAACGCTGGCGGCGTGCTTAACACATGCAAGTCGAACGGAAAGGCCCCTGCTTGCAGGGGTACTCGAGTGGCGAACGGGTGAGTAACACGTGGGTGATCTACCCCGCACTTCGGGATAAGCCCGGGAAACTGGGTCTAATACCGGATATTCACGCCCCTTTTGTGTGGGGTGTGGAAAGATTTATCGGTGTGGGATGAGCTTGCGGCCTATCAGCTTGTTGGTGGGGTAATGGCCTACCAAGGCGTCGACGGGTAGCCGGCCTGAGAGGGTGTACGGCCACATTGGGACTGAGATACGGCCCAGACTCCTACGGGAGGCAGCAGTGGGGAATATTGCACAATGGGCGCAAGCCTGATGCAGCGACGCCGCGTGGGGGATGACGGCCTTCGGGTTGT…	8F 1512R	http://ijs.microbiologyresearch.org/content/journal/ijsem/10.1099/ijs.0.007468-0
HC9	JQ929061	ElAhwany et al., 2013	Sarcophyton glaucum				Red Sea, Hurghada, Egypt		30		Actinobacteria	Actinobacteria	Streptomycetales	Streptomycetaceae	Streptomyces	sp.	95	Starch casein, Nutrient Agar, International Streptomyces project medium, Reasoner’s medium	12-APR-2012	GCNGGCTGAGAGGNCGACCGGCCACACTGGGACTGAGACACGGCCCAGACTCCTACGGGAGGCAGCAGTGGGGAATATTGCACAATGGGCGAAAGCCTGATGCAGCGACGCCGCGTGAGGGATGACGGCCTTCGGGTTGTAAACCTCTTTCAGCAGGGAAGAAGCGAAAGTGACGGTACCTGCAGAAGAAGCGCCGGCTAACTACGTGCCAGCAGCCGCGGTAATACGTAGGGCGCAAGCGTTGTCCGGAATTATTGGGCGTAAAGAGCTCGTAGGCGGCTTGTCACGTCGGTTGTGAAAGCCCGGGGCTTAACCCCGGGTCTGCAGTCGATACGGGCAGGCTAGAGTTCGNNGGGGGAGATCGGAATTCNTGGTGTNGNGNTGANNTGNGCAGATATC…	NA
HC14	JQ929066	ElAhwany et al., 2013	Sarcophyton glaucum				Red Sea, Hurghada, Egypt		30		Actinobacteria	Actinobacteria	Streptomycetales	Streptomycetaceae	Streptomyces	sp.	96	Starch casein, Nutrient Agar, International Streptomyces project medium, Reasoner’s medium	13-APR-2012	GGCTGAGAGGNCGACCGGCCACACTGGGACTGAGACACGGCCCAGACTCCTACGGGAGGCAGCAGTGGGGAATATTGCACAATGGGCGAAAGCCTGATGCAGCGACGCCGCGTGAGGGATGACGGCCTTCGGGTTGTAAACCTCTTTCAGCAGGGAAGAAGCGAAAGTGACGGTACCTGCAGAAGAAGCGCCGGCTAACTACGTGCCAGCAGCCGCGGTAATACGTAGGGCGCAAGCGTTGTCCGGAATTATTGGGCGTAAAGAGCTCGTAGGCGGCTTGTCACGTCGGTTGTGAAAGCCCGGGGCTTAACCCCGGGTCTGCAGTCGATACGGGCAGGCTAGAGTTCGNNGGGGGAGATCGGAATTCNTGGTGTNGNGNTGANNTGNGCAGATATCAGG…	NA
IS0105	DQ517183	Bru ̈ck et a;/. 2007	Iciligorgia schrammi	45		27	Jim Atria wreck site off Pompano Beach, Florida		27	https://link.springer.com/article/10.1007/s10126-007-9009-1	Actinobacteria	Actinobacteria	Streptomycetales	Streptomycetaceae	Streptomyces	sp.	-	nutrient agar (NA), diluted marine agar 2216 (MA, 5 sea water:1 marine agar), YM, and Sabouraud dextrose agar (SB) plates	25-APR-2006	GAACTTTCCCGGGCTTTGTCCCGTTACAGCGATCCGACTCTGGAGTCGAGTTGCGATCATCCGGACACGAGAGTTTGGAGATAGTCCTCGCGCTTTGCCTTGTCTTGGTGGTCTATCTGTTGCCTTCTTTTT	FC27 RC1492	https://link.springer.com/article/10.1007/s10126-007-9009-1
IS0205	DQ517184	Bru ̈ck et a;/. 2007	Iciligorgia schrammi	45		27	Jim Atria wreck site off Pompano Beach, Florida		27		Actinobacteria	Actinobacteria	Corynebacteriales	Nocardiaceae	Rhodococcus	sp.	100	nutrient agar (NA), diluted marine agar 2216 (MA, 5 sea water:1 marine agar), YM, and Sabouraud dextrose agar (SB) plates	25-APR-2006	TCTAATACCGGATATGACCTCCTATCGCATGGTGGGTGGTGGAAAGATTTATCGGTGCAGGATGGGCCCGCGGCCTATCAGCTTGTTGGTGGGGTAATGGCCTACCAAGGCGACGACGGGTAGCCGACCTGAGAGGGTGACCGGCCACACTGGGACTGAGACACGGCCCAGACTCCTACGGGAGGCAGCAGTGGGGAATATTGCACAATGGGCGAAAGCCTGATGCAGCGACGCCGCGTGAGGGATGACGGCCTTCGGGTTGTAAACCTCTTTCAGCA	FC27 RC1492
LM0305	DQ517217	Bru ̈ck et a;/. 2007	Leptogorgia minimata	45		27	Jim Atria wreck site off Pompano Beach, Florida		27		Actinobacteria	Actinobacteria	Corynebacteriales	Dietziaceae	Dietzia	sp.	100	nutrient agar (NA), diluted marine agar 2216 (MA, 5 sea water:1 marine agar), YM, and Sabouraud dextrose agar (SB) plates	25-APR-2006	TCTAATACCGGATATGAACTCCTGCCGCATGGTGGGGGTTGGAAAGTTTTTCGGTGCAGGATGAGCCCGCGGCCTATCAGCTTGTTGGTGGGGTAATGGCCTACCAAGGCGACGACGGGTAGCCGGCCTGAGAGGGTGATCGGCCACACTGGGACTGAGACACGGCCCAGACTCCTACGGGAGGCAGCAGTGGGGAATATTGCACAATGGGCGAAAGCCTGATGCAGCGACGCCGCGTGGGGGATGACGGTCTTCGGATTGTAAACCCCTTTCAGTA	FC27 RC1492
LM0405	DQ517218	Bru ̈ck et a;/. 2007	Leptogorgia minimata	45		27	Jim Atria wreck site off Pompano Beach, Florida		27		Actinobacteria	Actinobacteria	Micrococcales	Micrococcaceae	Micrococcus	sp.	100	nutrient agar (NA), diluted marine agar 2216 (MA, 5 sea water:1 marine agar), YM, and Sabouraud dextrose agar (SB) plates	25-APR-2006	TCTAATACCGGATAGGAGCGTCCACCGCATGGTGGGTGTTGGAAAGATTTATCGGTTTTGGATGGACTCGCGGCCTATCAGCTTGTTGGTGAGGTAATGGCTCACCAAGGCGACGACGGGTAGCCGGCCTGAGAGGGTGACCGGCCACACTGGGACTGAGACACGGCCCAGACTCCTACGGGAGGCAGCAGTGGGGAATATTGCACAATGGGCGCAAGCCTGATGCAGCGACGCCGCGTGAGGGATGACGGCCTTCGGGTTGTAAACCTCTTTCAGTA	FC27 RC1492
SE0305	DQ517264	Bru ̈ck et a;/. 2007	Swiftia exertia	45		27	Jim Atria wreck site off Pompano Beach, Florida		27		Actinobacteria	Actinobacteria	Micrococcales	Micrococcaceae	Arthrobacter	sp.	100	nutrient agar (NA), diluted marine agar 2216 (MA, 5 sea water:1 marine agar), YM, and Sabouraud dextrose agar (SB) plates	25-APR-2006	TCTAATACCGGATATGACCCCCCATCGCATGGTGGTTGGTGGAAAGCTTTTGTGGTTTTGGATGGACTCGCGGCCTATCAGCTTGTTGGTGAGGTAATGGCTCACCAAGGCGACGACGGGTAGCCGGCCTGAGAGGGTGACCGGCCACACTGGGACTGAGACACGGCCCAGACTCCTACGGGAGGCAGCAGTGGGGAATATTGCACAATGGGCGCAAGCCTGATGCAGCGACGCCGCGTGAGGGATGACGGCCTTCGGGTTGTAAACCTCTTTCAGTA	FC27 RC1492
CL1305	DQ857748	Santiago-Vazquez et al., 2007	Cirrhipathes lutkeni	45		27	Jim Atria wreck site off Pompano Beach, Florida				Actinobacteria	Actinobacteria	Propionibacteriales	Propionibacteriaceae	Propionibacterium	sp.	93	Nutrient (NA) and diluted Marine Agar	18-JUL-2006	CCTGATCGGGCATTCGATACGAGTTGACTAGACGAAGGTAGGGAGAAGTGGAATACCATGGTGAGCGGTGGAATGAGCAGATATCAGGATGGAACACCAGTGGCGAAGGCAGTTCTCTGATCCTTTCCTGACGCTGAGGAGAGAAAGCGTGGGGAGCGAACAGACTTAGATACCATGGTAGTGGTACTCTGTAAACGGTGGGTACTAGGTGTAGGGTCCAGTTCCACGGGTGCTGTGCTGTAGCTAACGCTTTAAGTACCCCGCCTGGGGAGTACGGCCGCAAGGCTAAAACTCATAGGAATTGACGGGGCCGCGCACAAGCGGCGGAGCATGCGGATTAATTAGATGCAACGCGTAGAACCTTACCTGGGTTCGACATGGATCGGGAGTGTTCAGAGA…	FC27 RC1492
BZB4		Meyer	Pseudodiploria strigosa mucus		healthy	NA	Belize: Carrie Bow Cay Field Station; 16.797 N 88.0844 W	mucus	30° C		Actinobacteria	Actinobacteria	Micrococcales	Micrococcaceae	Kocuria	sp.	1	CSA+pen	2018-09-25	GTCACCGCATGGTGGCGTGTGGAAAGGGTTTTACTGGTTTTGGATGGGCTCACGGCCTATCAGCTTGTTGGTGGGGTAATGGCTCACCAAGGCGACGACGGGTAGCCGGCCTGAGAGGGTGACCGGCCACACTGGGACTGAGACACGGCCCAGACTCCTACGGGAGGCAGCAGTGGGGAATATTGCACAATGGGCGAAAGCCTGATGCAGCGACGCCGCGTGAGGGATGACGGCCTTCGGGTTGTAAACCTCTTTCAGCACGGAAGAAGCGAAAGTGACGGTACGTGCAGAAGAAGCGCCGGCTAACTACGTGCCAGCAGCCGCGGTAATACGTAGGGCGCAAGCGTTGTCCGGAATTATTGGGCGTAAAGAGCTCGTAGGCGGTTTGTCGCGTCTGCT…	8F/1492R
BZB8		Meyer	Pseudodiploria strigosa mucus		healthy	NA	Belize: Carrie Bow Cay Field Station; 16.797 N 88.0844 W	mucus	30° C		Actinobacteria	Actinobacteria	Micrococcales	Micrococcaceae	Micrococcus	sp.	0.99	GASWA	2018-09-25	GCTTGCTGGGTGGATTAGTGGCGAACGGGTGAGTAACACGTGAGTAACCTGCCCTTAACTCTGGGATAAGCCTGGGAAACTAGGTCTAATACCGGATAGGAGCGCCTACCGCATGGTGGGTGTTGGAAAGATTTATCGGTTTTGGATGGACTCGCGGCCTATCAGCTTGTTGGTGAGGTAATGGCTCACCAAGGCGACGACGGGTAGCCGGCCTGAGAGGGTGACCGGCCACACTGGGACTGAGACACGGCCCAGACTCCTACGGGAGGCAGCAGTGGGGAATATTGCACAATGGGCGAAAGCCTGATGCAGCGACGCCGCGTGAGGGATGACGGCCTTCGGGTTGTAAACCTCTTTCAGTAGGGAAGAAGCGAAAGTGACGGTACCTGCAGAAGAAGC…	8F/1492R
4746K6-B20	HQ640815	Kellogg	Lophelia pertusa				Gulf of mexico				Actinobacteria	Actinobacteria	Actinomycetales	Micrococcaceae	Kocuria		100	seawater agar (GASWA; Smith & Hayasaka, 2172	2010-11-23	CTAACACATGCAAGTCGAACGCTGAAGCTTGGGTGTTTACATCTGGGTGGATGAGTGGCGAACGGGTGAG TAATACGTGAGTAACCTGCCCTTGACTCTGGGATAAGCCTGGGAAACTGGGTCTAATACTGGATACTACA CATTCTCGCATGGGGGTGTGTGGAAAGGGTTTTACTGGTTTTGGATGGGCTCACGGCCTATCAGCTTGTT GGTGGGGTAATGGCCTACCAAGGCGACGACGGGTAGCCGGCCTGAGAGGGTGACCGGCCACACTGGGACT GAGACACGGCCCAGACTCCTACGGGAGGCAGCAGTGGGGAATATTGCACAATGGGCGAAAGCCTGATGCA GCGACGCCGCGTGAGGGATGACGGCCTTCGGGTTGTAAACCTCT…	Eco8F 1492R
3712_K3_LP_ATT_B-01		Kellogg	Lophelia pertusa								Actinobacteria	Actinobacteria	Actinomycetales	Microbacteriaceae	unclass_Microbacteriaceae		95	ATCC 295 S8	2009	GCGAGACGCTGGCGGCGTGCTTAACACATGCAAGTCGAACGATGATCCGGTGCTTGCACCGGGGATTAGTGGCGAACGGGTGAGTAACACGTGAGTAACCTGCCCTTAACTCTGGGATAAGCCTGGGAAACTGGGTCTAATACCGGATATGACTCCTCATCGCATGGTGGGGGGTGGAAAGCTTTATTGTGGTTTTGGATGGACTCGCGGCCTATCAGCTTGTTGGTGAGGTAATGGCTCACCAAGGCGACGACGGGTAGCCGGCCTGAGAGGGTGACCGGCCACACTGGGACTGAGACACGGCCCAGACTCCTACGGGAGGCAGCAGTGGGGAATATTGCACAATGGGCGCAAGCCTGATGCAGCGACGCCGCGTGAGGGATGACGGCCTTCGGGTTG…	8F/1492R
3712_K7_LP_ATT_B-01		Kellogg	Lophelia pertusa								Actinobacteria	Actinobacteria	Actinomycetales	Micrococcaceae	unclass_Micrococcaceae		96	ATCC 295 S8	2009	GCGAGACGCTGGCGGCGTGCTTACACATGCAAGTCGAACGATGATCCGGTGCTTGCACCGGGGATTAGTGGCGAACGGGTGAGTAACACGTGAGTAACCTGCCCTTAACTCTGGGATAAGCCTGGGAAACTGGGTCTAATACCGGATATGACTCCTCATCGCATGGTGGGGGGTGGAAAGCTTTATTGTGGTTTTGGATGGACTCGCGGCCTATCAGCTTGTTGGTGAGGTAATGGCTCACCAAGGCGACGACGGGTAGCCGGCCTGAGAGGGTGACCGGCCACACTGGGACTGAGACACGGCCCAGACTCCTACGGGAGGCAGCAGTGGGGAATATTGCACAATGGGCGCAAGCCTGATGCAGCGACGCCGCGTGAGGGATGACGGCCTTCGGGTTGT…	8F/1492R
3712_K7_LP_ATT_B-02		Kellogg	Lophelia pertusa								Actinobacteria	Actinobacteria	Actinomycetales	Micrococcaceae	unclass_Micrococcaceae		98	ATCC 295 S8	2009	TCGAGACGCTGGCGGCGTGCTTACACATGCAAGTCGAACGATGATCCGGTGCTTGCACCGGGGATTAGTGGCGAACGGGTGAGTAACACGTGAGTAACCTGCCCTTAACTCTGGGATAAGCCTGGGAAACTGGGTCTAATACCGGATATGACTCCTCATCGCATGGTGGGGGGTGGAAAGCTTTATTGTGGTTTTGGATGGACTCGCGGCCTATCAGCTTGTTGGTGAGGTAATGGCTCACCAAGGCGACGACGGGTAGCCGGCCTGAGAGGGTGACCGGCCACACTGGGACTGAGACACGGCCCAGACTCCTACGGGAGGCAGCAGTGGGGAATATTGCACAATGGGCGCAAGCCTGATGCAGCGACGCCGCGTGAGGGATGACGGCCTTCGGGTTGT…	8F/1492R
3705_K5_LP_OSA_B-06		Kellogg	Lophelia pertusa								Actinobacteria	Actinobacteria	Actinomycetales	Microbacteriaceae	Curtobacterium		95	Orange Serum Agar	2008	GCGAGACGCTGGCGGCGTGCTTACACATGCAAGTCGAACGATGATGCCCAGCTTGCTGGGTGGATTAGTGGCGAACGGGTGAGTAACACGTGAGTAACCTGCCCCTGACTCTGGGATAAGCGTTGGAAACGACGTCTAATACTGGATATGATCACTGGCCGCATGGTCTGGTGGTGGAAAGATTTTTTGGTTGGGGATGGACTCGCGGCCTATCAGCTTGTTGGTGAGGTAATGGCTCACCAAGGCGACGACGGGTAGCCGGCCTGAGAGGGTGACCGGCCACACTGGGACTGAGACACGGCCCAGACTCCTACGGGAGGCAGCAGTGGGGAATATTGCACAATGGGCGAAAGCCTGATGCAGCAACGCCGCGTGAGGGATGACGGCCTTCGGGTTGTA…	8F/1492R
3705_K5_LP_OSA_F-14		Kellogg	Lophelia pertusa								Actinobacteria	Actinobacteria	Actinomycetales	Microbacteriaceae	Curtobacterium		96	Orange Serum Agar	2009	CGAGACGCTGGCGGCGTGCTTAACACATGCAAGTCGAACGATGATGCCCAGCTTGCTGGGTGGATTAGTGGCGAACGGGTGAGTAACACGTGAGTAACCTGCCCCTGACTCTGGGAAAAGCGTTGGAAACGACGTCTAATACTGGATATGATCACTGGCCGCATGGTCTGGTGGTGGAAAGATTTTTTGGTTGGGGATGGACTCGCGGCCTATCAGCTTGTTGGTGAGGTAATGGCTCACCAAGGCGACGACGGGTAGCCGGCCTGAGAGGGTGACCGGCCACACTGGGACTGAGACACGGCCCAGACTCCTACGGGAGGCAGCAGTGGGGAATATTGCACAATGGGCGAAAGCCTGATGCAGCAACGCCGCGTGAGGGATGACGGCCTTCGGGTTGTA…	8F/1492R
3705_K8_LP_OSA_B-03		Kellogg	Lophelia pertusa								Actinobacteria	Actinobacteria	Actinomycetales	Microbacteriaceae	Curtobacterium		96	Orange Serum Agar	2009	GCGAGACGCTGGCGGCGTGCTTAACACATGCAAGTCGAACGATGATGCCCAGCTTGCTGGGTGGATTAGTGGCGAACGGGTGAGTAACACGTGAGTAACCTGCCCCTGACTCTGGGATAAGCGTTGGAAACGACGTCTAATACTGGATATGATCACTGGCCGCATGGTCTGGTGGTGGAAAGATTTTTTGGTTGGGGATGGACTCGCGGCCTATCAGCTTGTTGGTGAGGTAATGGCTCACCAAGGCGACGACGGGTAGCCGGCCTGAGAGGGTGACCGGCCACACTGGGACTGAGACACGGCCCAGACTCCTACGGGAGGCAGCAGTGGGGAATATTGCACAATGGGCGAAAGCCTGATGCAGCAACGCCGCGTGAGGGATGACGGCCTTCGGGTTGT…	8F/1492R
3712_K3_LP_OSA_F-06		Kellogg	Lophelia pertusa								Actinobacteria	Actinobacteria	Actinomycetales	Microbacteriaceae	Curtobacterium		97	Orange Serum Agar	2009	TCGAGACGCTGGCGGCGTGCTAACACATGCAAGTCGAACGATGATGCCCAGCTTGCTGGGTGGATTAGTGGCGAACGGGTGAGTAACACGTGAGTAACCTGCCCCTGACTCTGGGATAAGCGTTGGAAACGACGTCTAATACTGGATATGATCACTGGCCGCATGGTCTGGTGGTGGAAAGATTTTTTGGTTGGGGATGGACTCGCGGCCTATCAGCTTGTTGGTGAGGTAATGGCTCACCAAGGCGACGACGGGTAGCCGGCCTGAGAGGGTGACCGGCCACACTGGGACTGAGACACGGCCCAGACTCCTACGGGAGGCAGCAGTGGGGAATATTGCACAATGGGCGAAAGCCTGATGCAGCAACGCCGCGTGAGGGATGACGGCCTTCGGGTTGTA…	8F/1492R
3705_K3_LP_OSA_B-01		Kellogg	Lophelia pertusa								Actinobacteria	Actinobacteria	Actinomycetales	Microbacteriaceae	unclass_Microbacteriaceae		95	Orange Serum Agar	2008	CGAATCTACACGTAACAGAATAGTTTCTGCCTGCTCAAGATGTTCCAAAAAAAGCAACAAATTTTTTTTCTCCCCCCCCAAACACTTAAAAAAAAAAACCCATAATTTTTTTATCCCCCTTCCAAACGACATCTAATACTAAATATGATCTCTGGCCGCATGGTCTGGTGGTGGAAAGATTTTTTGGTTGGGGATGGACTCGCGGCCTATCAGCTTGTTGGTGAGGTAATGGCTCACCAAGGCGACGACGGGTAGCCGGCCTGAGAGGGTGACCGGCCACACTGGGACTGAGACACGGCCCAGACTCCTACGGGAGGCAGCAGTGGGGAATATTGCACAATGGGCGAAAGCCTGATGCAGCAACGCCGCGTGAGGGATGACGGCCTTCGGGTTGTAAAC…	8F/1492R
3705_K5_LP_OSA_B-02		Kellogg	Lophelia pertusa								Actinobacteria	Actinobacteria	Actinomycetales	Microbacteriaceae	Curtobacterium		97	Orange Serum Agar	2009	CGAGACGCTGGCGGCGTGCATACACATGCAAGTCGAACGATGATGCCCAGCTTGCTGGGTGGATTAGTGGCGAACGGGTGAGTAACACGTGAGTAACCTGCCCCTGACTCTGGGATAAGCGTTGGAAACGACGTCTAATACTGGATATGATCACTGGCCGCATGGTCTGGTGGTGGAAAGATTTTTTGGTTGGGGATGGACTCGCGGCCTATCAGCTTGTTGGTGAGGTAATGGCTCACCAAGGCGACGACGGGTAGCCGGCCTGAGAGGGTGACCGGCCACACTGGGACTGAGACACGGCCCAGACTCCTACGGGAGGCAGCAGTGGGGAATATTGCACAATGGGCGAAAGCCTGATGCAGCAACGCCGCGTGAGGGATGACGGCCTTCGGGTTGTAA…	8F/1492R
3712_K2_LP_OSA_B-07		Kellogg	Lophelia pertusa								Actinobacteria	Actinobacteria	Actinomycetales	Microbacteriaceae	Curtobacterium		96	Orange Serum Agar	2008	TCGAGACGCTGGCGGCGTGAATAACACATGCAAGTCGAACGATGATGCCCAGCTTGCTGGGTGGATTAGTGGCGAACGGGTGAGTAACACGTGAGTAACCTGCCCCTGACTCTGGGATAAGCGTTGGAAACGACGTCTAATACTGGATATGATCACTGGCCGCATGGTCTGGTGGTGGAAAGATTTTTTGGTTGGGGATGGACTCGCGGCCTATCAGCTTGTTGGTGAGGTAATGGCTCACCAAGGCGACGACGGGTAGCCGGCCTGAGAGGGTGACCGGCCACACTGGGACTGAGACACGGCCCAGACTCCTACGGGAGGCAGCAGTGGGGAATATTGCACAATGGGCGAAAGCCTGATGCAGCAACGCCGCGTGAGGGATGACGGCCTTCGGGTTGT…	8F/1492R
3705_K2_LP_OSA_B-01		Kellogg	Lophelia pertusa								Actinobacteria	Actinobacteria	Actinomycetales	Microbacteriaceae	Curtobacterium		97	Orange Serum Agar	2008	TCGAGACGCTGGCGGCGTGCTTACACATGCAAGTCGAACGATGATGCCCAGCTTGCTGGGTGGATTAGTGGCGAACGGGTGAGTAACACGTGAGTAACCTGCCCCTGACTCTGGGATAAGCGTTGGAAACGACGTCTAATACTGGATATGATCACTGGCCGCATGGTCTGGTGGTGGAAAGATTTTTTGGTTGGGGATGGACTCGCGGCCTATCAGCTTGTTGGTGAGGTAATGGCTCACCAAGGCGACGACGGGTAGCCGGCCTGAGAGGGTGACCGGCCACACTGGGACTGAGACACGGCCCAGACTCCTACGGGAGGCAGCAGTGGGGAATATTGCACAATGGGCGAAAGCCTGATGCAGCAACGCCGCGTGAGGGATGACGGCCTTCGGGTTGTA…	8F/1492R
3705_K2_LP_OSA_B-02		Kellogg	Lophelia pertusa								Actinobacteria	Actinobacteria	Actinomycetales	Microbacteriaceae	Curtobacterium		96	Orange Serum Agar	2008	CGAGACGCTGGCGGCGTGCTTACACATGCAAGTCGAACGATGATGCCCAGCTTGCTGGGTGGATTAGTGGCGAACGGGTGAGTAACACGTGAGTAACCTGCCCCTGACTCTGGGATAAGCGTTGGAAACGACGTCTAATACTGGATATGATCACTGGCCGCATGGTCTGGTGGTGGAAAGATTTTTTGGTTGGGGATGGACTCGCGGCCTATCAGCTTGTTGGTGAGGTAATGGCTCACCAAGGCGACGACGGGTAGCCGGCCTGAGAGGGTGACCGGCCACACTGGGACTGAGACACGGCCCAGACTCCTACGGGAGGCAGCAGTGGGGAATATTGCACAATGGGCGAAAGCCTGATGCAGCAACGCCGCGTGAGGGATGACGGCCTTCGGGTTGTAA…	8F/1492R
3705_K2_LP_OSA_B-08		Kellogg	Lophelia pertusa								Actinobacteria	Actinobacteria	Actinomycetales	Microbacteriaceae	Curtobacterium		97	Orange Serum Agar	2008	CGAGACGCTGCGGCATGCTTAACACATGCAAGTCGAACGATGATGCCCAGCTTGCTGGGTGGATTAGTGGCGAACGGGTGAGTAACACGTGAGTAACCTGCCCCTGACTCTGGGATAAGCGTTGGAAACGACGTCTAATACTGGATATGATCACTGGCCGCATGGTCTGGTGGTGGAAAGATTTTTTGGTTGGGGATGGACTCGCGGCCTATCAGCTTGTTGGTGAGGTAATGGCTCACCAAGGCGACGACGGGTAGCCGGCCTGAGAGGGTGACCGGCCACACTGGGACTGAGACACGGCCCAGACTCCTACGGGAGGCAGCAGTGGGGAATATTGCACAATGGGCGAAAGCCTGATGCAGCAACGCCGCGTGAGGGATGACGGCCTTCGGGTTGTAA…	8F/1492R
3705_K4_LP_OSA_B-08		Kellogg	Lophelia pertusa								Actinobacteria	Actinobacteria	Actinomycetales	Microbacteriaceae	Curtobacterium		98	Orange Serum Agar	2008	CGAGACGCTGGCGGCGTGCTTACACATGCAAGTCGAACGATGATGCCCAGCTTGCTGGGTGGATTAGTGGCGAACGGGTGAGTAACACGTGAGTAACCTGCCCCTGACTCTGGGATAAGCGTTGGAAACGACGTCTAATACTGGATATGATCACTGGCCGCATGGTCTGGTGGTGGAAAGATTTTTTGGTTGGGGATGGACTCGCGGCCTATCAGCTTGTTGGTGAGGTAATGGCTCACCAAGGCGACGACGGGTAGCCGGCCTGAGAGGGTGACCGGCCACACTGGGACTGAGACACGGCCCAGACTCCTACGGGAGGCAGCAGTGGGGAATATTGCACAATGGGCGAAAGCCTGATGCAGCAACGCCGCGTGAGGGATGACGGCCTTCGGGTTGTAA…	8F/1492R
3705_K5_LP_OSA_B-11		Kellogg	Lophelia pertusa								Actinobacteria	actinobacteria	Actinomycetales	Microbacteriaceae	Curtobacterium		97	Orange Serum Agar	2009	GGAGACGCTGGCGGCGTGCTTAACACATGCAAGTCGAACGATGATGCCCAGCTTGCTGGGTGGATTAGTGGCGAACGGGTGAGTAACACGTGAGTAACCTGCCCCTGACTCTGGGATAAGCGTTGGAAACGACGTCTAATACTGGATATGATCACTGGCCGCATGGTCTGGTGGTGGAAAGATTTTTTGGTTGGGGATGGACTCGCGGCCTATCAGCTTGTTGGTGAGGTAATGGCTCACCAAGGCGACGACGGGTAGCCGGCCTGAGAGGGTGACCGGCCACACTGGGACTGAGACACGGCCCAGACTCCTACGGGAGGCAGCAGTGGGGAATATTGCACAATGGGCGAAAGCCTGATGCAGCAACGCCGCGTGAGGGATGACGGCCTTCGGGTTGTA…	8F/1492R
3705_K10_LP_OSA_B-05		Kellogg	Lophelia pertusa								Actinobacteria	Actinobacteria	Actinomycetales	Microbacteriaceae	Curtobacterium		96	Orange Serum Agar	2009	GCGAGACGCTGGCGGCGTGCTTACACATGCAAGTCGAACGATGATGCCCAGCTTGCTGGGTGGATTAGTGGCGAACGGGTGAGTAACACGTGAGTAACCTGCCCCTGACTCTGGGATAAGCGTTGGAAACGACGTCTAATACTGGATATGATCACTGGCCGCATGGTCTGGTGGTGGAAAGATTTTTTGGTTGGGGATGGACTCGCGGCCTATCAGCTTGTTGGTGAGGTAATGGCTCACCAAGGCGACGACGGGTAGCCGGCCTGAGAGGGTGACCGGCCACACTGGGACTGAGACACGGCCCAGACTCCTACGGGAGGCAGCAGTGGGGAATATTGCACAATGGGCGAAAGCCTGATGCAGCAACGCCGCGTGAGGGATGACGGCCTTCGGGTTGTA…	8F/1492R
3712_K2_LP_OSA_B-06		Kellogg	Lophelia pertusa								Actinobacteria	Actinobacteria	Actinomycetales	Microbacteriaceae	Curtobacterium		96	Orange Serum Agar	2009	CGAGACGCTGGCGGCGATGCTTACACATGCAAGTCGAACGATGATGCCCAGCTTGCTGGGTGGATTAGTGGCGAACGGGTGAGTAACACGTGAGTAACCTGCCCCTGACTCTGGGATAAGCGTTGGAAACGACGTCTAATACTGGATATGATCACTGGCCGCATGGTCTGGTGGTGGAAAGATTTTTTGGTTGGGGATGGACTCGCGGCCTATCAGCTTGTTGGTGAGGTAATGGCTCACCAAGGCGACGACGGGTAGCCGGCCTGAGAGGGTGACCGGCCACACTGGGACTGAGACACGGCCCAGACTCCTACGGGAGGCAGCAGTGGGGAATATTGCACAATGGGCGAAAGCCTGATGCAGCAACGCCGCGTGAGGGATGACGGCCTTCGGGTTGTA…	8F/1492R
3712_K7_LP_OSA_B-09		Kellogg	Lophelia pertusa								Actinobacteria	Actinobacteria	Actinomycetales	Microbacteriaceae	Curtobacterium		96	Orange Serum Agar	2010	TCGAGACGCTGGCGGGAGCCATACACATGCAAGTCGAACGATGATGCCCAGCTTGCTGGGTGGATTAGTGGCGAACGGGTGAGTAACACGTGAGTAACCTGCCCCTGACTCTGGGATAAGCGTTGGAAACGACGTCTAATACTGGATATGATCACTGGCCGCATGGTCTGGTGGTGGAAAGATTTTTTGGTTGGGGATGGACTCGCGGCCTATCAGCTTGTTGGTGAGGTAATGGCTCACCAAGGCGACGACGGGTAGCCGGCCTGAGAGGGTGACCGGCCACACTGGGACTGAGACACGGCCCAGACTCCTACGGGAGGCAGCAGTGGGGAATATTGCACAATGGGCGAAAGCCTGATGCAGCAACGCCGCGTGAGGGATGACGGCCTTCGGGTTGTA…	8F/1492R
6201-C1	HM173276	Kellogg	Paragorgia arborea								Actinobacteria	Actinobacteria	Actinomycetales	Microoccaceae	Nesterenkonia		99	GASWA	2011	CGGTTGGATTAGTGGCGAACGGGTGAGTATCACGTGAGTAACCTTCCCTTGACTCTGGGATAAGCCCGGG AAACTGGGTCTAATACCGGATACGACCAGTCCTCGCATGGGGTGCTGGTGGAAAGATTTATCGGTCTTGG ATGGACTCGCGGCCTATCAGCTTGTTGGTGAGGTAATAGCTCACCAAGGCGATGACGGGTAGCCGGCCTG AGAGGGTGACCGGCCACACTGGGACTGAGACACGGCCCAGACTCCTACGGGAGGCAGCAGTGGGGAATAT TGCACAATGGGCGAAAGCCTGATGCAGCGACGCCGCGTGCGGGATGACGGCCTTCGGGTTGTAAACCGCT TTCAGCAGGGAAGAAGCGAAAGTGACGGTACCTGCAGAAGAAGC…	Eco8F 1492R
6203-C25	HM173287	Kellogg	Plumarella superba								Actinobacteria	Actinobacteria	Actinomycetales	Microbacteriaceae	unclassified_Microbacteraceae		99	GASWA	2011	GTCGAACGGTGAAGGAGAGCTTGCTCTTTGGATCAGTGGCGAACGGGTGAGTAACACGTGAGCAATCTGC CCCTGACTCTGGGATAAGCGTTGGAAACGACGTCTAATACCGGATATGAGCTACGACCGCATGGTCGGTA GTTGGAAAGAATTTTGGTCAGGGATGAGCTCGCGGCCTATCAGCTTGTTGGTGAGGTAATGGCTCACCAA GGCGTCGACGGGTAGCCGGCCTGAGAGGGTGACCGGCCACACTGGGACTGAGACACGGCCCAGACTCCTA CGGGAGGCAGCAGTGGGGAATATTGCACAATGGGCGCAAGCCTGATGCAGCAACGCCGCGTGAGGGACGA CGGCCTTCGGGTTGTAAACCTCTTTTAGCGAGGAAGAAGCGAAA…	Eco8F 1492R
130HD15	not accessioned yet	Medina	Orbicella faveolata		Diseased with Yellow Band, tissue from healthy portion of colony		Puerto Morelos, Jardines reef, 20, 49.863N, 86, 52.462W	whole fragment	26		Actinobacteria	Actinobacteria	Actinomycetales	Micrococcaceae	Kocuria	kristinae	99	Marine agar		ttttcaacggagagtttgatcctggctcaggacgaacgctggcggcgtgcttaacacatgcaagtcgaacgctgaagcctggtgcttgcaccgggtggatgagtggcgaacgggtgagtaatacgtgagtgacctgcctttgactctgggataagcctgggaaactgggtctaataccggatgcgactactgcccgcatgggctggtggtggaaagggttatgtactggtcttagatgggctcacggcctatcagctggttggtggggtaatggcctaccaaggcgacgacgggtagccggcctgagagggtgaccggccacactgggactgagacacggcccagactcctacgggaggcagcagtggggaatattgcacaatgggcgcaagcctgatg…	Sequence pulled out of whole genome by RAST
130HD1	not accessioned yet	Medina	Orbicella faveolata		Diseased with Yellow Band, tissue from healthy portion of colony		Puerto Morelos, Jardines reef, 20, 49.863N, 86, 52.462W	whole fragment	26		Actinobacteria	Actinobacteria	Actinomycetales	Micrococcaceae	Kocuria	kristinae	99	Marine agar		ttttcaacggagagtttgatcctggctcaggacgaacgctggcggcgtgcttaacacatgcaagtcgaacgctgaagcctggtgcttgcaccgggtggatgagtggcgaacgggtgagtaatacgtgagtgacctgcctttgactctgggataagcctgggaaactgggtctaataccggatgcgactactgcccgcatgggctggtggtggaaagggttatgtactggtcttagatgggctcacggcctatcagctggttggtggggtaatggcccaccaaggcgacgacgggtagccggcctgagagggtgaccggccacactgggactgagacacggcccagactcctacgggaggcagcagtggggaatattgcacaatgggcgcaagcctgatg…	Sequence pulled out of whole genome by RAST
MPL29-TCBS	NR_116578	Sere and Sweet	Porites lutea		Diseased	29	Reunion Island (21°07'S55°32'E and Mayotte (12°41'S, 45°10'E)	whole fragment	32	Mayotte	Actinobacteria	Actinobacteria	Micrococcales	Micrococcaceae	Micrococcus	yunnanensis	0.99	TCBS		CGTGACTTGACGGGCGGTGTGTACAAGGCCCGGGAACGTATTCACCGCAGCGTTGCTGATCTGCGATTACTAGCGACTCCGACTTCATGGGGTCGAGTTGCAGACCCCAATCCGAACTGAGACCGGCTTTTTGGGATTAGCTCCACCTCACAGTATCGCAACCCATTGTACCGGCCATTGTAGCATGCGTGAAGCCCAAGACATAAGGGGCATGATGATTTGACGTCGTCCTCACCTTCCTCCGAGTTGACCCCGGCAGTCTCCCATGAGTCCCCACCANTACGTGCTGGCAACATGGAACGAGGGTTGCGCTCGTTGCGGGACTTAACCCAACATCTCACGACACGAGCTGACGACAACCATGCACCACCTGTGAACCCGCCCCAAAGGGGAAACCGT…	1492R	Mayotte
MPL68-TCBS	NR_134088	Sere and Sweet	Porites lutea		Diseased	29	Reunion Island (21°07'S55°32'E and Mayotte (12°41'S, 45°10'E)	whole fragment	32	Mayotte	Actinobacteria	Actinobacteria	Micrococcales	Micrococcaceae	Micrococcus	aloeverae	0.99	TCBS		ACCGGCTTCGGGTGTTACCAACTTTCGTGACTTGACGGGCGGTGTGTACAAGGCCCGGGAACGTATTCACCGCAGCGTTGCTGATCTGCGATTACTAGCGACTCCGACTTCATGGGGTCGAGTTGCAGACCCCAATCCGAACTGAGACCGGCTTTTTGGGATTAGCTCCACCTCACAGTATCGCAACCCATTGTACCGGCCATTGTAGCATGCGTGAAGCCCAAGACATAAGGGGCATGATGATTTGACGTCGTCCTCACCTTCCTCCGAGTTGACCCCGGCAGTCTCCCATGAGTCCCCACCACGACGTGCTGGCAACATGGAACGAGGGTTGCGCTCGTTGCGGGACTTAACCCAACATCTCACGACACGAGCTGACGACAACCATGCACCACCTGT…	1492R	Mayotte
RPL212	NR_116578	Sere and Sweet	Porites lutea		Diseased	29	Reunion Island (21°07'S55°32'E and Mayotte (12°41'S, 45°10'E)	whole fragment	32	Reunion	Actinobacteria	Actinobacteria	Micrococcales	Micrococcaceae	Micrococcus	yunnanensis	0.99	Marine Agar		CGGGTGTTACCAACTTTCGTGACTTGACGGGCGGTGTGTACAAGGCCCGGGAACGTATTCACCGCAGCGTTGCTGATCTGCGATTACTAGCGACTCCGACTTCATGGGGTCGAGTTGCAGACCCCAATCCGAACTGAGACCGGCTTTTTGGGATTAGCTCCACCTCACAGTATCGCAACCCATTGTACCGGCCATTGTAGCATGCGTGAAGCCCAAGACATAAGGGGCATGATGATTTGACGTCGTCCTCACCTTCCTCCGAGTTGACCCCGGCAGTCTCCCATGAGTCCCCACCANNACGTGCTGGCAACATGGAACGAGGGTTGCGCTCGTTGCGGGACTTAACCCAACATCTCACGACACGAGCTGACGACAACCATGCACCACCTGTGAACCCGC…	1492R	Reunion
7Ma	KM877226	Peixoto	Millepora alcicornis	3-15			Recife de Fora Reef, located off Porto Seguro, Brazil		26		Actinobacteria	Actinobacteria	Actinomycetales	Micrococcaceae	Arthrobacter	sp.	97	Luria bertani	2012-10-20	ATGAAGCCCAGCTTGCTGGGTGGATTAGTGGCGAACGGGTGAGTAACACGTGAGTAACCTGCCCCTGACTCTGGGATAAGCCCGGGAAACTGGGTCTAATACCGGATATGACTTTTGACCGCATGGTTGAGGGTGGAAAGATTTATCGGTTGGGGATGGACTCGCGGCCTATCAGCTTGTTGGTGAGGTAATGGCTCACCAAGGCGACGACGGGTAGCCGGCCTGAGAGGGTGACCGGCCACACTGGGACTGAGACACGGCCCAGACTCCTACGGGAGGCAGCAGTGGGGAATATTGCACAATGGGCGCAAGCCTGATGCAGCGACGCCGCGTGAGGGATGACGGCCTTCGGGTTGTAAACCTCTTTCAGTAGGGAAGAAGCGAAAGTGACGGTACCTG…	27f 1492r
9Ma	KM877241	Peixoto	Millepora alcicornis	3-15			Recife de Fora Reef, located off Porto Seguro, Brazil		26		Actinobacteria	Actinobacteria	Actinomycetales	Micrococcaceae	Arthrobacter	sp.	99	Luria bertani	2012-10-20	TCGAATGNNNAAGCCCAGCTTGCTGGGTGGATTAGTGGCGAACGGGTGCGTATCACGTGAGTAACCTGCCCCTGACTCTGGGATAAGCCCGGGAAACTGGGTCTAATACCGGATATGACTTTTGACCGCATGGTTGAGGGTGGAAAGATTTATCGGTTGGGGATGGACTCGCGGCCTATCAGCTTGTTGGTGAGGTAATGGCTCACCAAGGCGACGACGGGTAGCCGGCCTGAGAGGGTGACCGGCCACACTGGGACTGAGACACGGCCCAGACTCCTACGGGAGGCAGCAGTGGGGAATATTGCACAATGGGCGCAAGCCTGATGCAGCGACGCCGCGTGAGGGATGACGGCCTTCGGGTTGTAAACCTCTTTCAGTAGGGAAGAAGCGAAAGTGACG…	27f 1492r
10Ma	KM877246	Peixoto	Millepora alcicornis	3-15			Recife de Fora Reef, located off Porto Seguro, Brazil		26		Actinobacteria	Actinobacteria	Actinomycetales	Micrococcaceae	Arthrobacter	sp.	98	Luria bertani	2012-10-20	CGTGAGTAACCTGCCCCTGACTCTGGGATAAGCCCGGGAAACTGGGTCTAATACCGGATATGACTTTTGACCGCATGGTTGAGGGTGGAAAGATTTATCGGTTGGGGATGGACTCGCGGCCTATCAGCTTGTTGGTGAGGTAATGGCTCACCAAGGCGACGACGGGTAGCCGGCCTGAGAGGGTGACCGGCCACACTGGGACTGAGACACGGCCCAGACTCCTACGGGAGGCAGCAGTGGGGAATATTGCACAATGGGCGCAAGCCTGATGCAGCGACGCCGCGTGAGGGATGACGGCCTTCGGGTTGTAAACCTCTTTCAGTAGGGAAGAAGCGAAAGTGACGGTACCTGCAGAAGAAGCGCCGGCTAACTACGTGCCAGCAGCCGCGGTAATACGTA…	27f 1492r
12Mb	KM877225	Peixoto	Mussismilia braziliensis	3-15			Recife de Fora Reef, located off Porto Seguro, Brazil		26		Actinobacteria	Actinobacteria	Actinomycetales	Micrococcaceae	Micrococcus	luteus	97	Luria bertani	2012-10-20	AAACTGGGTCTAATACCGGATAGGAGCGTCTACCGCATGGTGGGTGTTGGAAAGATTTATCGGTTTTGGATGGACTCGCGGCCTATCAGCTTGTTGGTGAGGTAATGGCTCACCAAGGCGACGACGGGTAGCCGGCCTGAGAGGGTGACCGGCCACACTGGGACTGAGACACGGCCCAGACTCCTACGGGAGGCAGCAGTGGGGAATATTGCACAATGGGCGCAAGCCTGATGCAGCGACGCCGCGTGAGGGATGACGGCCTTCGGGTTGTAAACCTCTTTCAGTAGGGAAGAAGCGAAAGTGACGGTACCTGCAGAAGAAGCACCGGCTAACTACGTGCCAGCAGCCGCGGTAATACGTAGGGTGCGAGCGTTATCCGGAATTATTGGGCGTAAAGAG…	27f 1492r
14Ma	KM877229	Peixoto	Millepora alcicornis	3-15			Recife de Fora Reef, located off Porto Seguro, Brazil		26		Actinobacteria	Actinobacteria	Actinomycetales	Cellulomonadaceae	Cellulomonas	sp.	99	Luria bertani	2012-10-20	TGAGGGATGAAGGCCTTCGGGTTGTAAACCTCTTTCAGCAGGGAAGAAGCGCAAGTGACGGTACCTGCAGAAGAAGCGCCGGCTAACTACGTGCCAGCAGCCGCGGTAATACGTAGGGCGCAAGCGTTGTCCGGAATTATTGGGCGTAAAGAGCTCGTATGCGGTTTGTCGCGTCTGGTGTGAAAACTCGAGGCTCAACCTCGAGCTTGCATCGGGTACGGGCAGACTAGAGTGCCGTAGGGGAGACTGGAATTCCTGGTGTAGCGGTGGAATGCACAGATATCAGGAGGAACACCGATGGCGAAGGCAGGTCTCTGGGCCGCAACTGACGCTGAGGAGCGAAAGCATGGGGAGCGAACAGGATTAGATACCCTGGTAGTCCATGCCGTAAACGTTGGG…	27f 1492r
15Ma	KM877230	Peixoto	Millepora alcicornis	3-15			Recife de Fora Reef, located off Porto Seguro, Brazil		26		Actinobacteria	Actinobacteria	Actinomycetales	Micrococcineae	Microbacterium	sp.	97	Luria bertani	2012-10-20	TCAGGATGAACGCTGGCGGCGTGCTTAACACATGCAAGTCGAACGGTGAAGCAGGAGCTTGCTCTTGTGGATCAGTGGCGAACGGGCGAGTAACACGTGAGCAACCTGCCCCAGACTCTGGGATAAGCGCTGGAAACGGCGTCTAATACTGGATACGAGTGGAGACGGCATCGTCATTCACTGGAAAGAATTTCGGTCTGGGATGGGCTCGCGGCCTATCAGCTTGTTGGTGAGGTAATGGCTCACCAAGGCGTCGACGGGTAGCCGGCCTGAGAGGGTGACCGGCCACACTGGGACTGAGACACGGCCCAGACTCCTACGGGAGGCAGCAGTGGGGAATATTGCACAATGGGCGAAAGCCTGATGCAGCAACGCCGCGTGAGGGATGACGGCCTTCGG…	27f 1492r
16Ma	KM877231	Peixoto	Millepora alcicornis	3-15			Recife de Fora Reef, located off Porto Seguro, Brazil		26		Actinobacteria	Actinobacteria	Actinomycetales	Micrococcaceae	Micrococcus	luteus	97	Luria bertani	2012-10-20	GTCTAATACCGGATAGGAGCGTCCACCGCATGGTGGGTGTTGGAAAGATTTATCGGTTTTGGATGGACTCCCGGCCTATCAGCTTGTTGGTGAGGTAATGGCTCACCAAGGCGACGACGGGTAGCCGGCCCTGAGAGGGTGACCGGCCGCACTGGGACTGAGACACGGCCCAGACTCCTACGGGAGGCAGCAGTGGGGAATATTGCACAATGGGCGCAAGCCTGATGCAGNNNCGCCGCGTGAGGGATGACGGNNNTCGGGTTGTAANNNTCTTTCAGTAGGGAAGAAGCGAAAGTGACGGTACCTGCAGANNNNGCACCGGCTAACTACGTGNCAGCAGCCGCGGTAATACGTAGGGTGCGAGCGTTATCCGGAATTATTGGGCGTAAAGAGCTCGTA…	27f 1492r
22P	KM877237	Peixoto	Porites astreoides	3-15			Recife de Fora Reef, located off Porto Seguro, Brazil		26		Actinobacteria	Actinobacteria	Actinomycetales	Micrococcineae	Microbacterium	sp.	98	Luria bertani	2012-10-20	CAAGTCGAACGGTGAAGCTCAGCTTGCTGGGNNNATCAGTGGGCGAACGGGTGAGTAACACGTGAGNNACCTGCCCTGGACTCTGGGATAAGCGCTGGAAACGGCGTCTAATACTGGATATGAGACGTGATCGCATGGTCAACGTTTGGAAAGATTTTTCGGTCTGGGATGGGCTCGCGGCCTATCAGCTTGTTGGTGAGGTAATGGCTCACCAAGGCGTCGACGGGTAGCCGGCCTGAGAGGGTGACCGGCCACACTGGGACTGAGACACGGCCCAGACTCCTACGGGAGGCAGCAGTGGGGAATATTGCACAATGGGCGGAAGCCTGATGCAGCAACGCCGCGTGAGGGATGACGGCCTTTCGGGTTGTAAACCTCTTTTAGCAAGGAAAGAAGCTT…	27f 1492r
46Ma	KM877263	Peixoto	Millepora alcicornis	3-15			Recife de Fora Reef, located off Porto Seguro, Brazil		26		Actinobacteria	Actinobacteria	Actinomycetales	Micrococcaceae	Micrococcus	sp.	98	Luria bertani	2012-10-20	TAAGTGCCCCGCCTGGGGAGTTCGGCCGCAAGGCTAAAACTCAAAGGANNNGNCGGGGGCCCGCACAAGCGGCGGAGCATGCGGATTAATTCGATGCAACGCGAAGAACCTTACCAAGGCTTGACATGTTCTCGATCGCCGTAGAGATACGGTTTCCCCTTTGGGGCGGGTTCACAGGTGGTGCATGGTTGTCGTCAGCTCGTGTCGTGAGATGTTGGGTTAAGTCCCGCAACGAGCGCAACCCTCGTTCCATGTTGCCAGCACGTAATGGTGGGGACTCATGGGAGACTGCCGGGGTCAACTCGGAGGAAGGTGAGGACGACGTCAAATCATCATGCCCCTTATGTCTTGGGCTTCACGCATGCTACAATGGCCGGTACAATGGGTTGCGATACTGTG…	27f 1492r
M1	MK308603	Peixoto	Mussismilia hispida (supercoral)	3-15			Maraú		26		Actinobacteria	Actinobacteria	Micrococcales	Dermabacteraceae	Brachybacterium	sp.	99	Luria bertani	2018-04-24	TCAGGACGAACGCTGGCGGCGTGCTTAACACATGCAAGTCGAACGATGACGGTGGTGCTTGCACCACCTGATTAGTGGCGAACGGGTGAGTAACACGTGAGTAACCTGCCCCCCACTTCGGGATAACCTCGGGAAATCGTGGCTAATACCGGATATGAGCACTCATCGCATGGTGGGTGTTGGAAAGATTTATCGGTGGGGGATGGACTCGCGGCCTATCAGTTTGTTGGTGAGGTGATGGCTCACCAAGACGATCACGGGTAGCCGGCCTGAGAGGGCGACCGGCCACACTGGGACTGAGACACGGCCCAGACTCCTACGGGAGGCAGCAGTGGGGAATATTGCACAATGGGCGAAAGCCTGATGCAGCGACGCCGCGTGGGGGATGACGGCCTTCGG…	27f 1492r
M5	MK308604	Peixoto	Mussismilia hispida (supercoral)	3-15			Maraú		26		Actinobacteria	Actinobacteria	Micrococcales	Dermabacteraceae	Brachybacterium	paraconglomeratum	99	Luria bertani	2018-04-24	AATCACGATCCCACCTTCGACAGCTCCCTCACGAGGATGGGCCACTGGCTTCGGGTGTTACCGACTTTCGTGACTTGACGGGCGGTGTGTACAAGGCCCGGGAACGTATTCACCGCAGCGTTGCTGATCTGCGATTACTAGCGACTCCGACTTCATGGGGTCGAGTTGCAGACCCCAATCCGAACTGAGGCCGGCTTTTTGGGATTCGCTCCACCTCACAGTTTCGCAACCCATTGTACCGACCATTGTAGCATGCTTGAAGCCCAAGACATAAGGGGCATGATGATTTGACGTCGTCCCCACCTTCCTCCGAGTTGACCCCGGCAGTCTCCTATGAGTCCCCACCATCACGTGCTGGCAACATAGAACGAGGGTTGCGCTCGTTGCGGGACTTAACCC…	27f 1492r
M11	MK308606	Peixoto	Mussismilia hispida (supercoral)	3-15			Maraú		26		Actinobacteria	Actinobacteria	Micrococcales	Dermabacteraceae	Brachybacterium	sp.	99	Luria bertani	2018-04-24	TCAGGACGAACGCTGGCGGCGTGCTTAACACATGCAAGTCGAACGATGACGGTGGTGCTTGCACCACCTGATTAGTGGCGAACGGGTGAGTAACACGTGAGTAACCTGCCCCCCACTTCGGGATAACCTCGGGAAATCGTGGCTAATACCGGATATGAGCACTCATCGCATGGTGGGTGTTGGAAAGATTTATCGGTGGGGGATGGACTCGCGGCCTATCAGTTTGTTGGTGAGGTGATGGCTCACCAAGACGATGACGGGTAGCCGGCCTGAGAGGGCGACCGGCCACACTGGGACTGAGACACGGCCCAGACTCCTACGGGAGGCAGCAGTGGGGAATATTGCACAATGGGCGAAAGCCTGATGCAGCGACGCCGCGTGGGGGATGACGGCCTTCGG…	27f 1492r
M28	MK308608	Peixoto	Mussismilia hispida (supercoral)	3-15			Maraú		26		Actinobacteria	Actinobacteria	Micrococcales	Dermabacteraceae	Brachybacterium	paraconglomeratum	99	Luria bertani	2018-04-24	CTCAGGACGAACGCTGGCGGCGTGCTTAACACATGCAAGTCGAACGATGACGGTGGTGCTTGCACCACCTGATTAGTGGCGAACGGGTGAGTAACACGTGAGTAACCTGCCCCCCACTTCGGGATAACCTCGGGAAATCGTGGCTAATACCGGATATGAGCACTCATCGCATGGTGGGTGTTGGAAAGATTTATCGGTGGGGGATGGACTCGCGGCCTATCAGTTTGTTGGTGAGGTGATGGCTCACCAAGACGATGACGGGTAGCCGGCCTGAGAGGGCGACCGGCCACACTGGGACTGAGACACGGCCCAGACTCCTACGGGAGGCAGCAGTGGGGAATATTGCACAATGGGCGAAAGCCTGATGCAGCGACGCCGCGTGGGGGATGACGGCCTTCG…	27f 1492r
M30	MK308609	Peixoto	Mussismilia hispida (supercoral)	3-15			Maraú		26		Actinobacteria	Actinobacteria	Micrococcales	Dermabacteraceae	Brachybacterium	paraconglomeratum	99	Luria bertani	2018-04-24	CTCAGGACGAACGCTGGCGGCGTGCTTAACACATGCAAGTCGAACGATGACGGTGGTGCTTGCACCACCTGATTAGTGGCGAACGGGTGAGTAACACGTGAGTAACCTGCCCCCCACTTCGGGATAACCTCGGGAAATCGTGGCTAATACCGGATATGAGCACTCATCGCATGGTGGGTGTTGGAAAGATTTATCGGTGGGGGATGGACTCGCGGCCTATCAGTTTGTTGGTGAGGTGATGGCTCACCAAGACGATGACGGGTAGCCGGCCTGAGAGGGCGACCGGCCACACTGGGACTGAGACACGGCCCAGACTCCTACGGGAGGCAGCAGTGGGGAATATTGCACAATGGGCGAAAGCCTGATGCAGCGACGCCGCGTGGGGGATGACGGCCTTCG…	27f 1492r
M13	MK308619	Peixoto	Mussismilia hispida (supercoral)	3-15			Maraú		26		Actinobacteria	Actinobacteria	Micrococcales	Dermabacteraceae	Brachybacterium	paraconglomeratum	98	Luria bertani	2018-04-24	CAGTCGACGATGACGGTGGTGCTTGCACCGCCNNNTTAGTGGCGAACGGGTGAGTAACACGTGAGTAACCTGCCCTCCACTTCGGGATAACCTCGGGAAATCGTGGCTAATACCGGATATGAGCACTCATCGCATGGTGAGTGCTGGAAAGATTTATCGGTGGGGGATGGACTCGCGGCCTATCAGTTTGTTGGTGAGGTGATGGCTCACCAAGACGATGACGGGTAGCCGGCCTGAGAGGGCGACCGGCCACACTGGGACTGAGACACGGCCCAGACTCCTACGGGAGGCAGCAGTGGGGAATATTGCACAATGGGCGAAAGCCTGATGCAGCGACGCCGCGTGGGGGATGACGGCCTTCGGGTTGTAAACCCCTTTCAGTAGGGAAGAAGCGAGAGT…	27f 1492r
M29	MK308626	Peixoto	Mussismilia hispida (supercoral)	3-15			Maraú		26		Actinobacteria	Actinobacteria	Micrococcales	Dermabacteraceae	Brachybacterium	paraconglomeratum	99	Luria bertani	2018-04-24	TCCCTCACGAGGATGGGCCACTGGCTTCGGGTGTTACCNNNNNTCGTGACTTGACGGGCGGTGTGTACAAGGCCCGGGAACGTATTCACCGCAGCGTTGCTGATCTGCGATTACTAGCGACTCCGACTTCATGGGGTCGAGTTGCAGACCCCAATCCGAACTGAGGCCGGCTTTTTGGGATTCGCTCCACCTCACAGTTTCGCAACCCATTGTACCGACCATTGTAGCATGCTTGAAGCCCAAGACATAAGGGGCATGATGATTTGACGTCGTCCCCACCTTCCTCCGAGTTGACCCCGGCAGTCTCCTATGAGTCCCCACCATTACGTGCTGGCAACATAGAACGAGGGTTGCGCTCGTTGCGGGACTTAACCCAACATCTCACGACACGAGCTGACG…	27f 1492r
EL360		unpublished	Eunicella labiata (gorgonian)		healthy	18.5ºC	36.979778 N 7.989111 W; Pedra da Greta, Faro	tissue	18ºC		Actinobacteria	Actinobacteria	Micrococcales	Brevibacteriaceae	Brevibacterium	sp.	100	Marine agar	2015-12-11	TCGAACGCTGAAGCCTGGTGCTTGCACCGGGTGGATGAGTGGCGAACGGGTGAGTAACACGTGAGTAACCTGCCCCTGACTTCGGGATAAGCCCGGGAAACTGGGTCTAATACCGGATACGACCGTCGGACGCATGTCTGGTGGTGGAAAGTTTTTTCGGTTGGGGATGGGCTCGCGGCCTATCAGTTTGTTGGTGAGGTAATGGCTCACCAAGACGACGACGGGTAGCCGGCCTGAGAGGGCGACCGGCCACACTGGGACTGAGACACGGCCCAGACTCCTACGGGAGGCAGCAGTGGGGAATATTGCACAATGGGGGAAACCCTGATGCAGCGACGCAGCGTGCGGGATGACGGCCTTCGGGTTGTAAACCGCTTTCAGCAGGGAAGAAGCGCAAGT…	27f 1492r
EL340		unpublished	Eunicella labiata (gorgonian)		healthy	18.5ºC	36.979778 N 7.989111 W; Pedra da Greta, Faro	tissue	18ºC		Actinobacteria	Actinobacteria	Actinomycetales	Dietziaceae	Dietzia	aerolata	100	Marine agar	2015-12-11	GGGGGTACACGAGTGGCGAACGGGTGAGTAACACGTGGGTAATCTGCCCTGCACTTCGGGATAAGCCTGGGAAACTGGGTCTAATACCGGATATGAGCTCCTGCCGCATGGTGGGGGTTGGAAAGTTTTTCGGTGCAGGATGAGCCCGCGGCCTATCAGCTTGTTGGTGGGGTAATGGCCTACCAAGGCGACGACGGGTAGCCGGCCTGAGAGGGTGATCGGCCACACTGGGACTGAGACACGGCCCAGACTCCTACGGGAGGCAGCAGTGGGGAATATTGCACAATGGGCGGAAGCCTGATGCAGCGACGCCGCGTGGGGGATGACGGTCTTCGGATTGTAAACCCCTTTCAGTAGGGACGAAGCGCAAGTGACGGTACCTGCAGAAGAAGCACCGGC…	27f 1492r
EL342		unpublished	Eunicella labiata (gorgonian)		healthy	18.5ºC	36.979778 N 7.989111 W; Pedra da Greta, Faro	tissue	18ºC		Actinobacteria	Actinobacteria	Actinomycetales	Dermacoccaceae	Kytococcus	sp.	99	Marine agar	2015-12-11	GGTGAAGCGGGTGCTTGCACTCGTGGGATCAGTGGCGAACGGGTGAGTAACACGTGAGTAACCTGCCCTCCACTCTGGGATAAGCGCTGGAAACGGCGTCTAATACTGGATATGACCGACCCCTGCATGGGGTGTTGGTGGAAAGATTTATCGGTGGTGGATGGACTCGCGGCCTATCAGCTTGTTGGTGGGGTAATGGCCTACCAAGGCGACGACGGGTAGCCGGCCTGAGAGGGCGACCGGCCACACTGGGACTGAGACACGGCCCAGACTCCTACGGGAGGCAGCAGTGGGGAATATTGCACAATGGGCGAAAGCCTGATGCAGCGACGCCGCGTGAGGGATGACGGCCTTCGGGTTGTAAACCTCTTTCAGCAGGGAAGAAGCTTTTGTGACGGT…	27f 1492r
ApWi57		Sharp	Astrangia poculata								Actinobacteria	Actinobacteria	Micrococcales	Micrococcaceae	Microbacterium	profundi	99.2	DIFCO 2216	2018-12-01	GGGGCATAGCCCGGGGAAACCCGGATTAATATCCCATGGTATCAAGACATGGCATCATGATTTGATTAAAGCTTCGGCGGTAAAAGATGAGTATGCGTCCTATTAGTTAGTTGGTAAGGTAACGGCTTACCAAGGCAGCGATAGGTAGGGGTCCTGAGAGGGAGATCCCCCACACTGGTACTGAGACACGGACCAGACTCCTACGGGAGGCAGCAGTGAGGAATATTGGACAATGGGCGAGAGCCTGATCCAGCCATGCCGCGTGCAGGAAGACGGCCCTATGGGTTGTAAACTGCTTTTACAGAGGAAGAAACACCCCCTCGTGAGGGGGCTTGACGGTACTCTGCGAATAAGGATCGGCTAACTCCGTGCCAGCAGCCGCGGTAATACGGAGGATCC…	27F 1492R
ApWi59		Sharp	Astrangia poculata								Actinobacteria	Actinobacteria	Micrococcales	Micrococcaceae	Microbacterium	profundi	99.2	DIFCO 2216	2018-12-01	GGGGCATAGCCCGGGGAAACCCGGATTAATATCCCATGGTATCAAGACATGGCATCATGATTTGATTAAAGCTTCGGCGGTAAAAGATGAGTATGCGTCCTATTAGTTAGTTGGTAAGGTAACGGCTTACCAAGGCAGCGATAGGTAGGGGTCCTGAGAGGGAGATCCCCCACACTGGTACTGAGACACGGACCAGACTCCTACGGGAGGCAGCAGTGAGGAATATTGGACAATGGGCGAGAGCCTGATCCAGCCATGCCGCGTGCAGGAAGACGGCCCTATGGGTTGTAAACTGCTTTTACAGAGGAAGAAACACCCCCTCGTGAGGGGGCTTGACGGTACTCTGCGAATAAGGATCGGCTAACTCCGTGCCAGCAGCCGCGGTAATACGGAGGATCC…	27F 1492R
ApWi68		Sharp	Astrangia poculata								Actinobacteria	Actinobacteria	Micrococcales	Micrococcaceae	Microbacterium	profundi	99.2	DIFCO 2216	2018-12-01	GGTGCGTAACGCGTATACAATCTACCTTTTACAGGGGCATAGCCCGGGGAAACCCGGATTAATATCCCATGGTATCAAGACATGGCATCATGATTTGATTAAAGCTTCGGCGGTAAAAGATGAGTATGCGTCCTATTAGTTAGTTGGTAAGGTAACGGCTTACCAAGGCAGCGATAGGTAGGGGTCCTGAGAGGGAGATCCCCCACACTGGTACTGAGACACGGACCAGACTCCTACGGGAGGCAGCAGTGAGGAATATTGGACAATGGGCGAGAGCCTGATCCAGCCATGCCGCGTGCAGGAAGACGGCCCTATGGGTTGTAAACTGCTTTTACAGAGGAAGAAACACCCCCTCGTGAGGGGGCTTGACGGTACTCTGCGAATAAGGATCGGCTAACT…	27F 1492R
ApWi69		Sharp	Astrangia poculata								Actinobacteria	Actinobacteria	Micrococcales	Micrococcaceae	Microbacterium	profundi	99.2	DIFCO 2216	2018-12-01	TCGGATGGTGGCGACCGGCGCACGGGTGCGTAACGCGTATACAATCTACCTTTTACAGGGGCATAGCCCGGGGAAACCCGGATTAATATCCCATGGTATCAAGACATGGCATCATGATTTGATTAAAGCTTCGGCGGTAAAAGATGAGTATGCGTCCTATTAGTTAGTTGGTAAGGTAACGGCTTACCAAGGCAGCGATAGGTAGGGGTCCTGAGAGGGAGATCCCCCACACTGGTACTGAGACACGGACCAGACTCCTACGGGAGGCAGCAGTGAGGAATATTGGACAATGGGCGAGAGCCTGATCCAGCCATGCCGCGTGCAGGAAGACGGCCCTATGGGTTGTAAACTGCTTTTACAGAGGAAGAAACACCCCCTCGTGAGGGGGCTTGACGGTAC…	27F 1492R
ApSp01		Sharp	Astrangia poculata								Actinobacteria	Actinobacteria	Micrococcales	Micrococcaceae	Micrococcus	yunnanensis	99.9	DIFCO 2216	2018-12-01	CTGCCCTTAACTCTGGGATAAGCCTGGGAAACTGGGTCTAATACCGGATAGGAGCGTCCACCGCATGGTGGGTGTTGGAAAGATTTATCGGTTTTGGATGGACTCGCGGCCTATCAGCTTGTTGGTGAGGTAATGGCTCACCAAGGCGACGACGGGTAGCCGGCCTGAGAGGGTGACCGGCCACACTGGGACTGAGACACGGCCCAGACTCCTACGGGAGGCAGCAGTGGGGAATATTGCACAATGGGCGAAAGCCTGATGCAGCGACGCCGCGTGAGGGATGACGGCCTTCGGGTTGTAAACCTCTTTCAGTAGGGAAGAAGCGAAAGTGACGGTACCTNCAGAAGAAGCACCGGCTAACTACGTGCCAGCAGCCGCGGTAATACGTAGGGTGCGAGC…	27F 1492R
ApSp06		Sharp	Astrangia poculata								Actinobacteria	Actinobacteria	Micrococcales	Micrococcaceae	Micrococcus	yunnanensis	99.9	DIFCO 2216	2018-12-01	CTGCCCTTAACTCTGGGATAAGCCTGGGAAACTGGGTCTAATACCGGATAGGAGCGTCCACCGCATGGTGGGTGTTGGAAAGATTTATCGGTTTTGGATGGACTCGCGGCCTATCAGCTTGTTGGTGAGGTAATGGCTCACCAAGGCGACGACGGGTAGCCGGCCTGAGAGGGTGACCGGCCACACTGGGACTGAGACACGGCCCAGACTCCTACGGGAGGCAGCAGTGGGGAATATTGCACAATGGGCGCAAGCCTGATGCAGCGACGCCGCGTGAGGGATGACGGCCTTCGGGTTGTAAACCTCTTTCAGTAGGGAAGAAGCGAAAGTGACGGTACCTGCAGAAGAAGCACCGGCTAACTACGTGCCAGCAGCCGCGGTAATACGTAGGGTGCGAGC…	27F 1492R
ApSp10		Sharp	Astrangia poculata								Actinobacteria	Actinobacteria	Micrococcales	Micrococcaceae	Microbacterium	pumilum	99.4	DIFCO 2216	2018-12-01	TGACTCTGGGATAAGCGCTGGAAACGGCGTCTAATACTGGATATGAGCTGCGATCGCATGGTCAGCAGTTGGAAAGAACTTCGGTCAGGGATGAGCTCGCGGCCTATCAGCTTGTTGGTGAGGTAATGGCTCACCAAGGCGTCGACGGGTAGCCGGCCTGAGAGGGTGACCGGCCACACTGGGACTGAGACACGGCCCAGACTCCTACGGGAGGCAGCAGTGGGGAATATTGCACAATGGGCGCAAGCCTGATGCAGCAACGCCGCGTGAGGGACGACGGCCTTCGGGTTGTAAACCTCTTTTAGCAGGGAAGAAGCGAAAGTGACGGTACCTGCAGAAAAAGCACCGGCTAACTACGTGCCAGCAGCCGCGGTAATACGTAGGGTGCAAGCGTTATCC…	27F 1492R
ApSp13		Sharp	Astrangia poculata								Actinobacteria	Actinobacteria	Propionibacteriales	Nocardioidaceae	Marmoricola	ginsengisoli	98	DIFCO 2216	2018-12-01	CACGTGAGTAATCTGCCCCTGGCTTTGGGATAGCCACCGGAAACGGTGATTAATACCGGATATGACAGCTTCTCGCATGAGATGGTTGTGGAAAGTTTTTCGGCCAGGGATGTGCTCGCGGCCTATCAGCTTGATGGTGAGGTAATGGCTCACCATGGCTTCGACGGGTAGCCGGCCTGAGAGGGTGACCGGCCACACTGGGACTGAGACACGGCCCAGACTCCTACGGGAGGCAGCAGTGGGGAATATTGGACAATGGGCGGAAGCCTGATCCAGCAACGCCGCGTGAGGGATGACGGCCTTCGGGTTGTAAACCTCTTTCGGTGGGGACGAAGCGCAAGTGACGGTACCCACTAAAGAAGCACCGGCCAACTACGTGCCAGCAGCCGCGGTAATACG…	27F 1492R
ApSp14		Sharp	Astrangia poculata								Actinobacteria	Actinobacteria	Micrococcales	Micrococcaceae	Microbacterium	pumilum	99.4	DIFCO 2216	2018-12-01	GTGGCGAACGGGTGAGTAACACGTGAGCAATCTGCCCCTGACTCTGGGATAAGCGCTGGAAACGGCGTCTAATACTGGATATGAGCTGCGATCGCATGGTCAGCAGTTGGAAAGAACTTCGGTCAGGGATGAGCTCGCGGCCTATCAGCTTGTTGGTGAGGTAATGGCTCACCAAGGCGTCGACGGGTAGCCGGCCTGAGAGGGTGACCGGCCACACTGGGACTGAGACACGGCCCAGACTCCTACGGGAGGCAGCAGTGGGGAATATTGCACAATGGGCGCAAGCCTGATGCAGCAACGCCGCGTGAGGGACGACGGCCTTCGGGTTGTAAACCTCTTTTAGCAGGGAAGAAGCGAAAGTGACGGTACCTGCAGAAAAAGCACCGGCTAACTACGTGC…	27F 1492R
ApSp28		Sharp	Astrangia poculata								Actinobacteria	Actinobacteria	Propionibacteriales	Nocardioidaceae	Marmoricola	ginsengisoli	98	DIFCO 2216	2018-12-01	GGATAACTTCCGGAAACGGAAGCTAATACCGAATACGACCACTTCAGGCATCTGATGGTGGTGGAAAGTTCCGGCGGTGAAGGATGAGCTCGCGGCCTATCAGCTTGTTGGTGAGGTAATGGCTCACCAAGGCTTCGACGGGTAGCCGGCCTGAGAGGGTGACCGGCCACACTGGGACTGAGACACGGCCCAGACTCCTACGGGAGGCAGCAGTGGGGAATATTGGACAATGGGCGAAAGCCTGATCCAGCAACGCCGCGTGAGGGATGACTGCCTTCGGGTTGTAAACCTCTTTCAGCGGGGACGAAGCGAAAGTGACGGTACCCGCAGAAGAAGCACCGGCCAACTACGTGCCAGCAGCCGCGGTAATACGTAGGGTGCGAGCGTTGTCCGGAATTA…	27F 1492R
ApSp41		Sharp	Astrangia poculata								Actinobacteria	Actinobacteria	Micrococcales	Micrococcaceae	Micrococcus	yunnanensis	99.9	DIFCO 2216	2018-12-01	CTTGCTGGGTGGATTAGTGGCGAACGGGTGAGTAACACGTGAGTAACCTGCCCTTAACTCTGGGATAAGCCTGGGAAACTGGGTCTAATACCGGATAGGAGCGTCCACCGCATGGTGGGTGTTGGAAAGATTTATCGGTTTTGGATGGACTCGCGGCCTATCAGCTTGTTGGTGAGGTAATGGCTCACCAAGGCGACGACGGGTAGCCGGCCTGAGAGGGTGACCGGCCACACTGGGACTGAGACACGGCCCAGACTCCTACGGGAGGCAGCAGTGGGGAATATTGCACAATGGGCGAAAGCCTGATGCAGCGACGCCGCGTGAGGGATGACGGCCTTCGGGTTGTAAACCTCTTTCAGTAGGGAAGAAGCGAAAGTGACGGTACCTNCAGAAGAAGCA…	27F 1492R
ApSp73		Sharp	Astrangia poculata								Actinobacteria	Actinobacteria	Micrococcales	Micrococcaceae	Micrococcus	yunnanensis	99.9	DIFCO 2216	2018-12-01	TCGAGCGGCGAACGGGTGAGTAACACGTGAGTAATCTGCCCTTCACTTCAGGATAGCTCCCGGAAACGGGGATTAATACTGGATATGACACATTCGCGCATGTGGGTGTGTGGAAAGTTTTTTCGGTGGGGGATGTGCTCGCGGCCTATCAGCTTGATGGTGGGGTAATGGCCTACCATGGCTTCGACGGGTAGCCGGCCTGAGAGGGTGACCGGTCACACTGGGACTGAGACACGGCCCAGACTCCTACGGGAGGCAGCAGTGGGGAATATTGGACAATGGGCGGAAGCCTGATCCAGCAACGCCGCGTGAGGGATGACGGCCTTCGGGTTGTAAACCTCTTTCAGCACAGACGAAGCGCAAGTGACGGTATGTGCAGAAGAAGGACCGGCCAACTAC…	27F 1492R
ApSp76		Sharp	Astrangia poculata								Actinobacteria	Actinobacteria	Micrococcales	Micrococcaceae	Micrococcus	yunnanensis	99.9	DIFCO 2216	2018-12-01	GGCGAACGGGTGAGTAACACGTGAGTAACCTGCCCTTAACTCTGGGATAAGCCTGGGAAACTGGGTCTAATACCGGATAGGAGCGTCCACCGCATGGTGGGTGTTGGAAAGATTTATCGGTTTTGGATGGACTCGCGGCCTATCAGCTTGTTGGTGAGGTAATGGCTCACCAAGGCGACGACGGGTAGCCGGCCTGAGAGGGTGACCGGCCACACTGGGACTGAGACACGGCCCAGACTCCTACGGGAGGCAGCAGTGGGGAATATTGCACAATGGGCGAAAGCCTGATGCAGCGACGCCGCGTGAGGGATGACGGCCTTCGGGTTGTAAACCTCTTTCAGTAGGGAAGAAGCGAAAGTGACGGTACCTGCAGAAGAAGCACCGGCTAACTACGTGCCA…	27F 1492R
ApSp92		Sharp	Astrangia poculata								Actinobacteria	Actinobacteria	Micrococcales	Micrococcaceae	Micrococcus	yunnanensis	99.9	DIFCO 2216	2018-12-01	GGGTGAGTAACACGTGAGTAACCTGCCCTTAACTCTGGGATAAGCCTGGGAAACTGGGTCTAATACCGGATAGGAGCGCCCACCGCATGGTGGGTGTTGGAAAGATTTATCGGTTTTGGATGGACTCGCGGCCTATCAGCTTGTTGGTGAGGTAATGGCTCACCAAGGCGACGACGGGTAGCCGGCCTGAGAGGGTGACCGGCCACACTGGGACTGAGACACGGCCCAGACTCCTACGGGAGGCAGCAGTGGGGAATATTGCACAATGGGCGAAAGCCTGATGCAGCGACGCCGCGTGAGGGATGACGGCCTTCGGGTTGTAAACCTCTTTCAGTAGGGAAGAAGCGAAAGTGACGGTACCTGCAGAAGAAGCACCGGCTAACTACGTGCCAGCAGCCG…	27F 1492R
ApSp93		Sharp	Astrangia poculata								Actinobacteria	Actinobacteria	Micrococcales	Micrococcaceae	Micrococcus	yunnanensis	99.9	DIFCO 2216	2018-12-01	GGGTGAGTAACACGTGAGTAACCTGCCCTTAACTCTGGGATAAGCCTGGGAAACTAGGTCTAATACCGGATAGGAGCGCCTACCGCATGGTGGGTGTTGGAAAGATTTATCGGTTTTGGATGGACTCGCGGCCTATCAGCTTGTTGGTGAGGTAATGGCTCACCAAGGCGACGACGGGTAGCCGGCCTGAGAGGGTGACCGGCCACACTGGGACTGAGACACGGCCCAGACTCCTACGGGAGGCAGCAGTGGGGAATATTGCACAATGGGCGAAAGCCTGATGCAGCGACGCCGCGTGAGGGATGACGGCCTTCGGGTTGTAAACCTCTTTCAGTAGGGAAGAAGCGAAAGTGACGGTACCTGCAGAAGAAGCACCGGCTAACTACGTGCCAGCAGCCG…	27F 1492R
PORF_32	NR_042656.1	Roik, Rahn, Hentschel	Porites lutea				reef flat, andaman sea, thailand			unpublished	Actinobacteria	Actinobacteria	Micrococcales	Microbacteriaceae	Microbacterium	aquimaris	0.9944	MarineBroth 37,4g/L; 15g/L Agar (ca. 25ppt Salz)	14.FEB.2019	TTTTTCGGTTTGGGATGGGCTCGCGGCCTATCAGCTTGTTGGTGAGGTAATGGCTCACCA AGGCGTCGACGGGTAGCCGGCCTGAGAGGGTGACCGGCCACACTGGGACTGAGACACGGC CCAGACTCCTACGGGAGGCAGCAGTGGGGAATATTGCACAATGGGCGCAAGCCTGATGCA GCAACGCCGCGTGAGGGATGACGGCCTTCGGGTTGTAAACCTCTTTTGGTAGGGAAGAAG CCTTCGGGTGACGGTACCTGCAGAAAAAGCGCCGGCTAACTACGTGCCAGCAGCCGCGGT AATACGTAGGGCGCAAGCGTTATCCGGAATTATTGGGCGTAAAGAGCTCGTAGGCGGTCT GTCGCGTCTGCTGTGAAATTCCGAGGCTCAACC…	27F 1492R	unpublished
2-PAT-P1		Kuek	Pocillopora acuta								Actinobacteria	Actinobacteria	Corynebacteriales	Gordoniaceae	Gordonia	hongkongensis	100	Minimal basal agar	2019-02-11	GCAGTCGAACGGAAAGGCCCAGCTTGCTGGGTACTCGAGTGGCGAACGGGTGAGTAACACGTGGGTGATCTGCCCTGCAC TCTGGGATAAGCCTGGGAAACTGGGTCTAATACCGGATATGACCAACTGTCGCATGGTGGTTGGTGGAAAGCTTTTGCGG TGTGGGATGGGCCCGCGGCCTATCAGCTTGTTGGTGGGGTAATGGCCTACCAAGGCGACGACGGGTAGCCGACCTGAGAG GGTGATCGGCCACACTGGGACTGAGACACGGCCCAGACTCCTACGGGAGGCAGCAGTGGGGAATATTGCACAATGGGCGC AAGCCTGATGCAGCGACGCCGCGTGAGGGATGACGGCCTTCGGGTTGTAAACCTCTTTCACCAGGGACGAAGCGT…	27f 1492r
2-SPM-P2		Kuek	Stylophora pistillata								Actinobacteria	Actinobacteria	Corynebacteriales	Gordoniaceae	Gordonia	terrae	99.71	Minimal basal agar	2019-02-11	GCAGTCGACGGAAGGCCCAGCTTGCTGGGTACTCGAGTGGCGAACGGGTGAGTAACACGTGGGTGATCTGCCCTGCACTC TGGGATAAGCCTGGGAAACTGGGTCTAATACCGGATATGACCAACTGTCGCATGGTGGTTGGTGGAAAGCTTTTGCGGTG TGGGATGGGCCCGCGGCCTATCAGCTTGTTGGTGGGGTAATGGCCTACCAAGGCGACGACGGGTAGCCGACCTGAGAGGG TGATCGGCCACACTGGGACTGAGACACGGCCCAGACTCCTACGGGAGGCAGCAGTGGGGAATATTGCACAATGGGCGCAA GCCTGATGCAGCGACGCCGCGTGAGGGATGACGGCCTTCGGGTTGTAAACCTCTTTCACCAGGGACGAAGCGTGA…	27f 1492r
Fun-113	DQ107405	Lampert et al, 2006	Fungia scutaria (mucus)		healthy	25	Gulf of Eilat, northern Red Sea	mucus	25		Bacteriodetes	Cytophagia	Cytophagales	Cytophagaceae	Cytophaga	sp.	97	Marine agar	28-JUN-2005	ACACATGCAAGTCGAGGGGTAACAGGAATAGCTTGCTATTTGCTGACGACCGGCGCACGGGTGCGGAACGCGTATGGAACCTGCCCCTGTCAGGGGAATAGCCCAGAGAAATTTGGATTAATGCCCCATGGTACCGTCATGTTGCATGGACAAGACGGTTAAAGATTTATCGGACAGGGNATGGCCATGCGTACCATTAGCTTGTTGGTAAGGTAACGGCTTACCAAGGCAACGATGGTTAGGGGCCCTGAGAGGGGGATCCCCCACACTGGTACTGAGACACGGACCAGACTCCTACGGGAGGCAGCAGTGAGGAATATTGGACAATGGCCGGAAGGTTGATCCAGCCATGCCGCGTGCAGGATGACGGCCCTATGGGTTGTAAACTGCTTTTACACG…	8-27f 1492r
s1cb117	DQ416552	Koren & Rosenberg (2006)	Oculina patagonica				Sedot Yam, in the Mediterranean off the coast of Israel				Bacteriodetes	Flavobacteriia	Flavobacteriales	Flavobacteriaceae			100	Marine agar	27-FEB-2006	GAACGCTAGCGGCAGGCCTAACACATGCAAGTCGAGGGGTAACAGGGATTGCTTGCAATCCGCTGACGACCGGCGCACGGGTGCGTAACGCGTATACAATCTACCTTTTGCTGGGGGATAGCCTTTGGAAACGAAGATTAATACCCCATAGTATGTTGATGTTGCATGACATTAATATTAAAGGTTACGGCAAAAGATGAGTATGCGTCCTATTAGCTAGATGGTGTGGTAACGGCATACCATGGCAACGATAGGTAGGGGCCCTGAGAGGGGGATCCCCCACACTGGTACTGAGACACGGACCAGACTCCTACGGGAGGCAGCAGTGAGGAATATTGGACAATGGAGGCAACTCTGATCCAGCCATGCCGCGTGCAGGAAGACTGCCCTATGGGTTGT…	8F 1492R
s1cb28	DQ416554	Koren & Rosenberg (2006)	Oculina patagonica				Sedot Yam, in the Mediterranean off the coast of Israel				Bacteriodetes	Flavobacteriia	Flavobacteriales				100	Marine agar	27-FEB-2006	CCTAACACATGCAAGTCGAGGGGTAACAGGGAAAAGCTTGCTTTTCCGCTGACGACCGGCGCACGGGTGCGGAACGCGTATCGAACCTGCCCCCTTCAGGGGAATAGCCCATGGAAACGTGGATTAATGCCCCATGGCACCCGATTACCACCTGGTATTCGGGTTAAAGATTTATCGGAAGGGGATGGCGATGCGTGCCATTAGCTGGTTGGTAAGGTAACGGCTTACCAAGGCGACGATGGCTAGGGGCCCTGAGAGGGGGATCCCCCACACTGGTACTGAGACACGGACCAGACTCCTACGGGAGGCAGCAGTGAGGAATATTGGACAATGGTGGGAACACTGATCCAGCCATGCCGCGTGCAGGATGACGGCCCTATGGGTTGTAAACTGCTTTTA…	8F 1492R
s1cb86	DQ416563	Koren & Rosenberg (2006)	Oculina patagonica				Sedot Yam, in the Mediterranean off the coast of Israel				Bacteriodetes	Cytophagia	Cytophagales				99	Marine agar	27-FEB-2006	GTGGGGAGCGAACAGGATTAGATACCCTGGTAGTCCACGCCCTTAAACGATGATTACTCGATGTATGCGATATACGGTATGCGTCCTAGCGAAAGCGTTAAGTAATCCACCTGGGGAGTACGCTCGCAAGAGTGAAACTCAAAGGAATTGACGGGGGTCCGCACAAGCGGTGGAGCATGTGGTTTAATTCGATGATACGCGAGGAACCTTACCTGGGCTAGAATGTGATTGCCCGACTCAGAGATGGGTCTTTCTTCGGACATGAAACAAGGTGCTGCATGGCTGTCGTCAGCTCGTGCCGTGAGGTGTTGGGTTAAGTCCCGCAACGAGCGCAACCCCTACTGTTAGTTGCCAGCATGTAAAGATGGGGACTCTAACAGGACTGCCTGCGCAAGCAGA…	8F 1492R
S1cc10	DQ416572	Koren & Rosenberg (2006)	Oculina patagonica				Sedot Yam, in the Mediterranean off the coast of Israel				Bacteriodetes	Flavobacteriia	Flavobacteriales				95	Marine agar	27-FEB-2006	TAGCGGCAGGCCTAACACATGCAAGTCGAACGGTAACAGAGGGAGCTTGCTCCCTGCTGACGAGTGGCGCACGGGTGCGTAACGCGTATACAACCTACCTTTTACAGGGGGATAGCCTTTAGAAATGAAGATTAATACCCCATAGTAAGTGACTGTGGCATCACGGACACTTTAAAGCTTCGGCGGTAAGAGATGGGTATGCGTCCTATTAGCTGGATGGTGTGGTAACGGCATACCATGGCGACGATAGGTAGGGGCCCTGAGAGGGGGATCCCCCACACTGGTACTGAGACACGGACCAGACTCCTACGGGAGGCAGCAGTGAGGAATATTGGACAATGGAGGGAACTCTGATCCAGCCATGCCGCGTGCAGGAAGACTGCCCTATGGGTTGTAAAC…	8F 1492R
S1cc20	DQ416578	Koren & Rosenberg (2006)	Oculina patagonica				Sedot Yam, in the Mediterranean off the coast of Israel				Bacteriodetes	Flavobacteriia	Flavobacteriales	Flavobacteriaceae			97	Marine agar	27-FEB-2006	TAGCGGCAGGCCTAACACATGCAAGTCGAGGGGTAACGGAGGGTGCTTGCACCCTGCCGACGACCGGCGCACGGGTGCGGAACGCGTATGGAACCTGCCCCTGTCAGGGGAATAGCCCAGGGAAACTTGGATTAATGCCCCATGGTATCGCGATATCGCATGATATTGTGATTAAAGATTTATCGGACAGGGATGGCCATGCGTACCATTAGCTAGTTGGTGGGGTAACGGCTTACCAAGGCAACGATGGTTAGGGGCCCTGAGAGGGGGATCCCCCACACTGGTACTGAGACACGGACCAGACTCCTACGGGAGGCAGCAGTGAGGAATATTGGACAATGGGCGGGAGCCTGATCCAGCCATGCCGCGTGCAGGATGACTGCCCTATGGGTTGTAAAC…	8F 1492R
S1cc29	DQ416582	Koren & Rosenberg (2006)	Oculina patagonica				Sedot Yam, in the Mediterranean off the coast of Israel				Bacteriodetes	Flavobacteriia	Flavobacteriales	Flavobacteriaceae			97	Marine agar	27-FEB-2006	GGCAGGCCTAACACATGCAAGTCGAGGGGTAACATAGTAGCTTGCTACTGATGACGACCGGCGCACGGGTGCGTAACGCGTATACAATCTGCCTCGTACTGGGGGATAGCCTTTGGAAACGAAGATTAACACCCCATAACGTCACGATATCGCATGGTATCTTGATTAAAGGTTACGGTACGGGATGAGTATGCGTCCTATTAGCTAGTTGGTATGGTAACGGCATACCAAGGCTACGATAGGTAGGGGCCCTGAGAGGGGGATCCCCCACACTGGTACTGAGACACGGACCAGACTCCTACGGGAGGCAGCAGTGAGGAATATTGGACAATGGGCGGAAGCCTGATCCAGCCATGCCGCGTGCAGGAAGACTGCCCTATGGGTTGTAAACTGCTTTTG…	8F 1492R
S1cc93	DQ416602	Koren & Rosenberg (2006)	Oculina patagonica				Sedot Yam, in the Mediterranean off the coast of Israel				Bacteriodetes	Flavobacteriia	Flavobacteriales	Flavobacteriaceae			99	Marine agar	27-FEB-2006	TAGCGGCAGGCCTAACACATGCAAGTCGAACGGTAACAGAGGGTGCTTGCACCCTGCTGACGAGTGGCGCACGGGTGCGGAACGCGTATGGAACCTGCCCCTGTCAGGGGAATAGCCCAGGGAAACTTGGATTAATGCCCCATGGTGACACGGAGTCGCATGACTTTGTGTTCAAAGATTTATCGGACAGGGATGGCCATGCGTACCATTAGCTTGTTGGTAAGGTAACGGCTTACCAAGGCAACGATGGTTAGGGGCCCTGAGAGGGGGATCCCCCACACTGGTACTGAGACACGGACCAGACTCCTACGGGAGGCAGCAGTGAGGAATATTGGACAATGGTGGGAACACTGATCCAGCCATGCCGCGTGCAGGATGACTGCCCTATGGGTTGTAAAC…	8F 1492R
w1cb6	DQ416609	Koren & Rosenberg (2006)	Oculina patagonica				Sedot Yam, in the Mediterranean off the coast of Israel				Bacteriodetes						99	Marine agar	27-FEB-2006	ACGCTCATGGACGAAAGCGTGGGGAGCGAACAGGATTAGATACCCTGGTAGTCCACGCCGTAAACGATGGACACTAGTTGTTGGAATTATTCAGTGACTAAGCGAAAGTGATAAGTGTCCCACCTGGGGAGTACGATCGCAAGATTGAAACTCAAAGGAATTGACGGGGGCCCGCACAAGCGGTGGAGCATGTGGTTTAATTCGATGATACGCGAGGAACCTTACCAGGGCTTAAATGTAGAGTGACAGGTCTAGAGATAGATTTTTCTTCGGACACTTTACAAGGTGCTGCATGGTTGTCGTCAGCTCGTGCCGTGAGGTGTCAGGTTAAGTCCTATAACGAGCGCAACCCTTGTCGTTAGTTGCCAGCAAGTAAAGTTGGGGACTCTAGCGAGACTG…	8F 1492R
w1cb28	DQ416616	Koren & Rosenberg (2006)	Oculina patagonica				Sedot Yam, in the Mediterranean off the coast of Israel				Bacteriodetes	Flavobacteriia	Flavobacteriales	Flavobacteriaceae			100	Marine agar	27-FEB-2006	AATTGACGGGGGCCCGCACAAGCGGTGGAGCATGTGGTTTAATTCGATGATACGCGAGGAACCTTACCAGGGCTTAAATGTAGATTGACAGGTTTAGAGATAGACTTTTCTTCGGACAATTTACAAGGTGCTGCATGGTTGTCGTCAGCTCGTGCCGTGAGGTGTCAGGTTAAGTCCTATAACGAGCGCAACCCCTGTTGTTAGTTGCCAGCATGTAAAGATGGGAACTCTAGCAAGACTGCCAGTGCAAACTGTGAGGAAGGTGGGGATGACGTCAAATCATCACGGCCCTTACGTCCTGGGCTACACACGTGCTACAATGGTAGGGACAGAGAGCAGCCACTTCGCGAGAAGGAGCGAATCTATAAACCCTATCACAGTTCGGATCGGAGTCTGCAA…	8F 1492R
w1cb40	DQ416618	Koren & Rosenberg (2006)	Oculina patagonica				Sedot Yam, in the Mediterranean off the coast of Israel				Bacteriodetes	Flavobacteriia	Flavobacteriales	Flavobacteriaceae			99	Marine agar	27-FEB-2006	GGTGCGTAACGCGTATAGAACTTACCTTTTACAGGGGGATAGCCTTTAGAAATGAAGATTAATATCCCATAGTATTGAGACTTGGCATCAAGACTTAATTAAAGATTTATCGGTAAAAGATGGCTATGCGTCCTATTAGCTAGATGGTAAGGTAACGGCTTACCATGGCAACGATAGGTAGGGGCCCTGAGAGGGGGATCCCCCACACTGGTACTGAGACACGGACCAGACTCCTACGGGAGGCAGCAGTGAGGAATATTGGGCAATGGAGGCAACTCTGACCCAGCCATGCCGCGTGCAGGAAGACTGCCCTATGGGTTGTAAACTGCTTTTATACAGGAAGAAACACTCGTACGTGTACGAGCTTGACGGTACTGTAAGAATAAGGACCGGCTAACT…	8F 1492R
w1cb46	DQ416621	Koren & Rosenberg (2006)	Oculina patagonica				Sedot Yam, in the Mediterranean off the coast of Israel				Bacteriodetes	Flavobacteriia	Flavobacteriales	Flavobacteriaceae			100	Marine agar	27-FEB-2006	TGGGGCTTTATGCCTCAGTGATTAAGCGAAAGTGATAAGTGACCCACCTGGGGAGTACGATCGCAAGATTGAAACTCAAAGGAATTGACGGGGGCCCGCACAAGCGGTGGAGCATGTGGTTTAATTCGATGATACGCGAGGAACCTTACCAGGGCTTAAATGTAAGTTGCATAGACCAGAGATGGTCTTTTCTTCGGACTACTTACAAGGTGCTGCATGGTTGTCGTCAGCTCGTGCCGTGAGGTGTCAGGTTAAGTCCTATAACGAGCGCAACCCCTACCGTTAGTTGCCAGCAAGTAAAGTTGGGGACTCTAGCGGGACTGCCGGTGCAAACCGAGAGGAAGGTGGGGATGACGTCAAATCATCACGGCCCTTACGTCCTGGGCTACACACGTGCTA…	8F 1492R
w1cb47	DQ416622	Koren & Rosenberg (2006)	Oculina patagonica				Sedot Yam, in the Mediterranean off the coast of Israel				Bacteriodetes	Cytophagia	Cytophagales	Cyclobacteriaceae			99	Marine agar	27-FEB-2006	GTGCGTAACGCGTATGCAACCTACCCTTTACTGGGGGATAGCCCGGAGAAATTCGGATTAATACCCCATGGTATCACAAGATGGCATCTGAAAGTGATTAAAGATTTATCGGTAAGGGATGGGCATGCGTGACATTAGATAGTTGGTGAGGTAACGGCTCACCAAGTCCACGATGTCTAGGGGTTCTGAGAGGATGATCCCCCACACTGGTACTGAGATACGGACCAGACTCCTACGGGAGGCAGCAGTAGGGAATATTGGTCAATGGGCGAGAGCCTGAACCAGCCATGCCGCGTGCAGGAAGACAGCTTTCTGAGTTGTAAACTGCTTTTATATGGGAAGAAAAAGGCCTTGCGAGGCAAATTGCCGGTACCATATGAATAAGCACCGGCTAACTCC…	8F 1492R
w1cc3	DQ416625	Koren & Rosenberg (2006)	Oculina patagonica				Sedot Yam, in the Mediterranean off the coast of Israel				Bacteriodetes	Flavobacteriia	Flavobacteriales	Flavobacteriaceae			99	Marine agar	27-FEB-2006	CGAACGGGATTAGATACCCCGGTAGTCCACGCCGTAAACGATGGATACTAGCTGTCGGGACCTCGGTCTCGGCGGCCAAGCGAAAGTGATAAGTATCCCACCTGGGGAGTACGTTCGCAAGAATGAAACTCAAAGGAATTGACGGGGGCCCGCACAAGCGGTGGAGCATGTGGTTTAATTCGATGATACGCGAGGAACCTTACCAGGGCTTAAATGCGGGCTGCATGGGACAGAGACGTCCCTTTCTTCGGACCGCCCGCAAGGTGCTGCATGGTTGTCGTCAGCTCGTGCCGTGAGGTGTCAGGTTAAGTCCTATAACGAGCGCAACCCCTACCGTTAGTTGCCAGCATGTAAAGATGGGGACTCTAACGGGACTGCCGGTGCAAACCGTGAGGAAGG…	8F 1492R
w1cc25	DQ416633	Koren & Rosenberg (2006)	Oculina patagonica				Sedot Yam, in the Mediterranean off the coast of Israel				Bacteriodetes	Flavobacteriia	Flavobacteriales	Flavobacteriaceae			99	Marine agar	27-FEB-2006	CCTAACACATGCAAGTCGAACGGTAACATAGGTTGCTTGCAACCTGATGACGAGTGGCGCACGGGTGCGGAACGCGTATGGAACCTGCCCCTGTCAGGGGAATAGCCCATGGAAACGTGGATTAATGCCCCATGGTACCGCCCTATCGCATGATAGGGTGGTTAAAGATTTATCGGACAGGGATGGCCATGCGTACCATTAGCTGGTTGGTAGGGTAACGGCCTACCAATGCAACGATGGTTAGGGGCCCTGAGAGGGGGATCCCCCACACTGGTACTGAGACACGGACCAGACTCCTACGGGAGGCAGCAGTGAGGAATATTGGACAATGGTCGGAAGACTGATCCAGCCATGCCGCGTGCAGGATGACGGCCCTATGGGTTGTAAACTGCTTTTGTA…	8F 1492R
w1cc34	DQ416634	Koren & Rosenberg (2006)	Oculina patagonica				Sedot Yam, in the Mediterranean off the coast of Israel				Bacteriodetes						98	Marine agar	27-FEB-2006	TGAACGCTAGCGGCAGGCCTAACACATGCAAGTCGAACGGTAACATAGATTGCTTGCAATCTGATGACGAGTGGCGCACGGGTGCGTAACGCGTATACAATCTACCTTTTACAGGAGGATAGCCTTTAGAAATGAAGATTAATACTCCATGGAAAGTGACTGTGGCATCACAGATACTTTAAAGCTTCGGTGGTAAAAGATGAGTATGCGTTCTATTAGCTAGATGGTGTGGTAACGGCATACCATGGCAACGATAGATAGGGGCCCTGAGAGGGGGATCCCCCACACTGGTACTGAGACACGGACCAGACTCCTACGGGAGGCAGCAGTGAGGAATATTGGACAATGGAGGCAACTCTGATCCAGCCATGCCGCGTGCAGGAAGACTGCCCTATGGGT…	8F 1492R
w2ca6	DQ416637	Koren & Rosenberg (2006)	Oculina patagonica				Sedot Yam, in the Mediterranean off the coast of Israel				Bacteriodetes	Flavobacteriia	Flavobacteriales	Flavobacteriaceae			99	Marine agar	27-FEB-2006	AACGATTGACACTAGTTGTTGGGCATTAGCTCAGTGACTAAGCGAAAGTGATAAGTGTCCCACCTGGGGAGTACGGTCGCAAGATTGAAACTCAAAGGAATTGACGGGGGCCCGCACAAGCGGTGGAGCATGTGGTTTAATTCGATGATACGCGAGGAACCTTACCAGGGCTTAAATGTAGGATGCATTAGCTAGAGATAGCTATTTCTTCGGACTTCTTACAAGGTGCTGCATGGTTGTCGTCAGCTCGTGCCGTGAGGTGTCAGGTTAAGTCCTATAACGAGCGCAACCCCTATTTTTAGTTGCTAACAGGTTAAGCTGAGGACTCTAAAGAGACTGCCGGTGCAAACCGTGAGGAAGGTGGGGATGACGTCAAATCATCACGGCCCTTACGTCCTG…	8F 1492R
w2ca9	DQ416638	Koren & Rosenberg (2006)	Oculina patagonica				Sedot Yam, in the Mediterranean off the coast of Israel				Bacteriodetes	Flavobacteriia	Flavobacteriales	Flavobacteriaceae			99	Marine agar	27-FEB-2006	TACGCCGTAAACGATGGATACTAGCTGTTGGACTTCGGTTCAGTGGCTAAGCGAAAGTGATAAGTATCCCACCTGGGGAGTACGTTCGCAAGAATGAAACTCAAAGGAATTGACGGGGGCCCGCACAAGCGGTGGAGCATGTGGTTTAATTCGATGATACGCGAGGAACCTTACCAGGGCTTAAATGTAAGTTGCATGATTTAGAGATAGATCTTTCTTCGGACTACTTACAAGGTGCTGCATGGTTGTCGTCAGCTCGTGCCGTGAGGTGTCAGGTTAAGTCCTATAACGAGCGCAACCCCTGTTGTTAGTTGCCAGCATGTAAAGATGGGAACTCTAACAAGACTGCCAGTGCAAACTGTGAGGAAGGTGGGGATGACGTCAAATCATCACGGCCCT…	8F 1492R
w2cc60	DQ416650	Koren & Rosenberg (2006)	Oculina patagonica				Sedot Yam, in the Mediterranean off the coast of Israel				Bacteriodetes	Flavobacteriia	Flavobacteriales	Flavobacteriaceae			98	Marine agar	27-FEB-2006	TACCCCGGTAGTCCACGCCGTAAACGATGGATACTAGCTGTTCGGCTTCGGCTGAGTGGCTAAGCGAAAGTGATAAGTATCCCCACCTGGGGAGTACGTTCGCAAGAATGAAACTCAAAGGAATTGACGGGGGGCCCGCACAAGCGGTGGAGCATGTGGTTTAATTCGATGATACGCGAGGAACCTTACCAGGGCTTAAATGTAAGTTGCATTAGTTAGAGATAGCTATTTCTTCGGACCACTTACAAGGTGCTGCATGGTTGTCGTCAGCTCGTGCCGTGAGGTGTCAGGTTAAGTCCTATAACGAGCGCAACCCCTGTTGTTAGTTGCCAGCATGTAAAGATGGGAACTCTAACAAGACTGCCGGTGCAAACCGTGAGGAAGGTGGGGATGACGTCA…	8F 1492R
w2cc61	DQ416651	Koren & Rosenberg (2006)	Oculina patagonica				Sedot Yam, in the Mediterranean off the coast of Israel				Bacteriodetes	Flavobacteriia	Flavobacteriales	Flavobacteriaceae			98	Marine agar	27-FEB-2006	CTGACACTGATGGACGAAAGCGTGGGGAGCGAACAGGATTAGATACCCTGGTAGTCCACGCCGTAAACGATGGATACTAGCTGTTCGGCTTCGGCTGAGTGGCTAAGCGAAAGTGATAAGTATCCCACCTGGGGAGTACGTTCGCAAGAATGAAACTCAAAGGAATTGACGGGGGCCCGCACAAGCGGTGGAGCATGTGGTTTAATTCGATGATACGCGAGGAACCTTACCAGGGCTTAAATGTAGAGTGACAGGTCTAGAGATAGACTTTTCTTCGGACACTTTACAAGGTGCTGCATGGTTGTCGTCAGCTCGTGCCGTGAGGTGTCAGGTTAAGTCCTATAACGAGCGCAACCCCTGTTGTTAGTTGCCAGCATGTAAAGATGGGAACTCTAACAA…	8F 1492R
w2cc82	DQ416653	Koren & Rosenberg (2006)	Oculina patagonica				Sedot Yam, in the Mediterranean off the coast of Israel				Bacteriodetes	Flavobacteriia	Flavobacteriales	Flavobacteriaceae			99	Marine agar	27-FEB-2006	GGTCTTCGGACTCCCGTGGCCAAGCGAAAGTGATAAGTGTCCCACCTGGGGAGTACGTTCGCAAGAATGAAACTCAAAGGAATTGACGGGGGCCCGCACAAGCGGTGGAGCATGTGGTTTAATTCGATGATACGCGAGGAACCTTACCAGGGCTTAAATGCAGTCTGCATAGGGTAGAGATACCCTTTTCTTCGGACCGACTGCAAGGTGCTGCATGGTTGTCGTCAGCTCGTGCCGTGAGGTGTCAGGTTAAGTCCTATAACGAGCGCAACCCCTGCCGTTAGTTGCCAGCATGTAAAGATGGGGACTCTAACGGGACTGCCGGTGCAAACCGTGAGGAAGGTGGGGACGACGTCAAATCATCACGGCCCTTACGTCCTGGGCCACACACGTGCTACA…	8F 1492R
w3ca9	DQ416657	Koren & Rosenberg (2006)	Oculina patagonica				Sedot Yam, in the Mediterranean off the coast of Israel				Bacteriodetes	Cytophagia	Cytophagales	Cytophagaceae			99	Marine agar	27-FEB-2006	TCGATGTTGGCGATACATTGTCAGCGTCCAAGCGAAAGCGTTAAGTAATCCACCTGGGGAGTACGCTCGCAAGAGTGAAACTCAAAGGAATTGACGGGGGTCCGCACAAGCGGTGGAGCATGTGGTTTAATTCGATGATACGCGAGGAACCTTACCTGGGCTCGAATGGTACTGGAATTATACAGAAATGTATAAGTCTTCGGACTGGTATCAAGGTGCTGCATGGCTGTCGTCAGCTCGTGCCGTGAGGTGTTGGGTTAAGTCCCGCAACGAGCGCAACCCCTACTGTTAGTTGCCAGCATGTAATGATGGGGACTCTAACAGGACTGCCTGCGCAAGCAGAGAGGAAGGAGGGGACGACGTCAAGTCATCATGGCCCTTACGCCCAGGGCTACACAC…	8F 1492R
w3cb46	DQ416672	Koren & Rosenberg (2006)	Oculina patagonica				Sedot Yam, in the Mediterranean off the coast of Israel				Bacteriodetes	Flavobacteriia	Flavobacteriales	Flavobacteriaceae			99	Marine agar	27-FEB-2006	CTGTCGGGCCTTCGGGCTCGGCGGCCAAGCGAAAGTGATAAGTATCCCACCTGGGGAGTACGTTCGCAAGAATGAAACTCAAAGGAATTGACGGGGGCCCGCACAAGCGGTGGAGCATGTGGTTTAATTCGATGATACGCGAGGAACCTTACCAGGGCTTAAATGTAGTGGGACAGGCTTAGAGATAGGCTTTTCTTCGGACTCATTACAAGGTGCTGCATGGTTGTCGTCAGCTCGTGCCGTGAGGTGTCAGGTTAAGTCCTATAACGAGCGCAACCCCTACCGTTAGTTGCCAGCGAGTCAAGTCGGGGACTCTAACGGGACTGCCGGTGCAAACCGTGAGGAAGGTGGGGACGACGTCAAATCATCACGGCCCTTACGTCCTGGGCCACACACGTG…	8F 1492R
w3cc9	DQ416674	Koren & Rosenberg (2006)	Oculina patagonica				Sedot Yam, in the Mediterranean off the coast of Israel				Bacteriodetes	Flavobacteriia	Flavobacteriales	Flavobacteriaceae			95	Marine agar	27-FEB-2006	CGGCAGGCCTAACACATGCAAGTCGAGGGGCAGCGAAGATTGCTTGCAATCTGTCGGCGACCGGCGCACGGGTGCGTAACGCGTATACAATCTACCTCATACTGGGGGATAGGCTTTAGAAATGAAGATTAAGACCCCATGGTATCCTGATACTGCATGGTATCGGGATTAAAGGTTACGGTATGAGATGAGTATGCGTTCTATTAGCTAGTTGGTATGGTAACGGCATACCAAGGCAACGATAGATAGGGGCCCTGAGAGGGGGATCCCCCACACTGGTACTGAGACACGGACCAGACTCCTACGGGAGGCAGCAGTGAGGAATATTGGACAATGGAGGGAACTCTGATCCAGCCATGCCGCGTGCAGGAAGACTGCCCTATGGGTTGTAAACTGCTT…	8F 1492R
w3cc11	DQ416675	Koren & Rosenberg (2006)	Oculina patagonica				Sedot Yam, in the Mediterranean off the coast of Israel				Bacteriodetes	Cytophagia	Cytophagales	Cytophagaceae			99	Marine agar	27-FEB-2006	TGACGCTGAGGCACGAAAGCATGGGTAGCGAACAGGATTAGATACCCTGGTAGTCCATGCCGTAAACGATGATTACTCGATGTTGGCGATATACAGTCAGCGTCCAAGCGAAAGCGTTAAGTAATCCACCTGGGGAGTACGCTCGCAAGAGTGAAACTCAAAGGAATTGACGGGGGTCCGCACAAGCGGTGGAGCATGTGGTTTAATTCGATGATACGCGAGGAACCTTACCTGGGCTCGAATGGTAAGGGAATTATCCAGAAATGGATGAGTCTTCGGACTCTTATCAAGGTGCTGCATGGCTGTCGTCAGCTCGTGCCGTGAGGTGTTGGGTTAAGTCCCGCAACGAGCGCAACCCCTACTGTTAGTTGCCAGCATGTAAAGATGGGGACTCTAACA…	8F 1492R
w3cc47	DQ416683	Koren & Rosenberg (2006)	Oculina patagonica				Sedot Yam, in the Mediterranean off the coast of Israel				Bacteriodetes	Cytophagia	Cytophagales	Cyclobacteriaceae	Fabibacter	sp.	99	Marine agar	27-FEB-2006	TAACGCTAGCGGCAGGCCTAATACATGCAAGTCGAACGAGATTTATGACTTCGGTTATAATGAAAGTGGCGCACGGGTGCGTAACGCGTATGCAACCTACCCTTTACTGGGGGATAGCCCGGAGAAATTCGGATTAATACCCCATGGTATTTACAGATGGCATCTGAAGTAAATTAAAGATTTATCGGTAAGGGATGGGCATGCGTGACATTAGCTAGTTGGTGAGGTAACGGCTCACCAAGGCAACGATGTCTAGGGGTTCTGAGAGGATGATCCCCCACACTGGTACTGAGATACGGACCAGACTCCTACGGGAGGCAGCAGTAGGGAATATTGGTCAATGGGCGAGAGCCTGAACCAGCCATGCCGCGTGCAGGAAGACAGCTTTCTGAGTTGTAA…	8F 1492R
1ta1	FJ952766	Rypien et al., 2009	Montastrea annularis				Florida Keys, USA			https://onlinelibrary.wiley.com/doi/pdf/10.1111/j.1462-2920.2009.02027.x	Bacteriodetes	Sphingobacteriia	Sphingobacteriales				99	Marine agar	23-APR-2009	AGTCGAGGGGTAACATAGATCTGCTTGCAGATTGATGACGACCGGCGCACGGGTGCGTAACGCGTATACAACTTACCTTTATCTGGAGGATAGCCCGGAGAAATTCGGATTAATACTCCATAGTATTATAAGACAGCATTGTTTAATAATTAAAGATTTATCGGATAAAGATAGGTATGCGTCCCATTAGCTAGTTGGTGCAGGTAACGGCTCACCAAGGCGACGATGGGTAGGGGTTCTGAGAGGAAGGTCCCCCACACTGGCACTGAGATACGGGCCAGACTCCTACGGGAGGCAGCAGTAGGGAATATTGGTCAATGGAGGCAACTCTGAACCAGCCATGCCGCGTGAACGATGAAGGCCTTCGGGTTGTAAAGTTCTTTTGTATGGGAAGAAACT…	27F 1492R, 530F 909R	https://onlinelibrary.wiley.com/doi/pdf/10.1111/j.1462-2920.2009.02027.x
1ta6	FJ952770	Rypien et al., 2009	Montastrea annularis				Florida Keys, USA				Bacteriodetes	Flavobacteriia	Flavobacteriales	Flavobacteriaceae			99	Marine agar	23-APR-2009	CAGGAGATTGCTTGCAATCTTGCTGACGACCGGCGCACGGGTGCGTAACGCGTATAGAACCTACCTTATATTGGGGGATAGCCCAGAGAAATTTGGATTAATACCCCATAGTATGTTGATTTGGCATCGGATTAACATTAAAGATTTATCGATATAAGATGGCTATGCGTCCTATTAGCTAGTTGGTATGGTAACGGCATACCAAGGCAACGATAGGTAGGGGTCCTGAGAGGGAGATCCCCCACACTGGTACTGAGACACGGACCAGACTCCTACGGGAGGCAGCAGTGAGGAATATTGGACAATGGAGGCAACTCTGATCCAGCCATGCCGCGTGCAGGAAGACTGCCCTATGGGTTGTAAACTGCTTTTATAGAGGAAGAAACCCCCTGACGTGTC…	27F 1492R, 530F 909R
1tc2	FJ952799	Rypien et al., 2009	Montastrea annularis				Florida Keys, USA				Bacteriodetes	Flavobacteriia	Flavobacteriales	Flavobacteriaceae			97	Marine agar	23-APR-2009	TGCAGTCGAGGGGTAACATGGTTGCTTGCAACTGATGACGACCGGCGCACGGGTGCGTAACGCGTATAGAACCTACCTTATAGTAAGGGATAGCCCAGAGAAATTTGGATTAATACCTTATAGTATCTTAAGTAAGCATTTACTAAGGATTAAAGATTTATTGCTATAAGATGGCTATGCGTTCTATTAGCTAGTTGGTATGGTAACGGCATACCAAGGCTACGATAGATAGGGGTCCTGAGAGGGAGATCCCCCACACTGGTACTGAGACACGGACCAGACTCCTACGGGAGGCAGCAGTGAGGAATATTGGACAATGGAGGCAACTCTGATCCAGCCATGCCGCGTGTAGGAAGACTGCCCTATGGGTTGTAAACTACTTTTATAGAGGAAGAAACC…	27F 1492R, 530F 909R
2H203	JF411500	Chiu et al., 2012	skeletal tissue growth anomalies in the coral Platygyra carnosus				Hoi Ha Wan Marine Park (HHWMP) and Port Shelter (PS)		20		Bacteriodetes	Flavobacteriia	Flavobacteriales	Flavobacteriaceae			99	Custom media: ASW + agar, peptone, yeast extract	15-FEB-2011	CGTCGAGGGGTAACAGAGAAAAGCTTGCTTTTTTGCTGACGACCGGCGCACGGGTGCGTAACGCGTATGCAATCTACCTTTTGCTAAGGGATAGCCCAGAGAAATTTGGATTAATACCTTATAGTATGATGACTTGGCATCAAGATATCATTAAAGGTTACGGCAAAAGATGAGCATGCGTTCTATTAGCTAGTTGGTGTGGTAACGGCATACCAAGGCAACGATAGATAGGGGTCCTGAGAGGGAGATCCCCCACACTGGTACTGAGACACGGACCAGACTCCTACGGGAGGCAGCAGTGAGGAATATTGGACAATGGAGGCAACTCTGATCCAGCCATGCCGCGTGCAGGAAGACTGCCCTATGGGTTGTAAACTGCTTTTATACAGGAAGAAACAC…	26F 785R, 355F 1055R, 927F 1492R
b1cb1	EF207059	Koren & Rosenberg, 2008	Oculina patagonica	1–3			Sedot Yam, in the Mediterranean Sea off the coast of Israel		30		Bacteriodetes	Flavobacteriia	Flavobacteriales	Flavobacteriaceae			97	Marine agar, Vibrio-specific thiosulfate–citrate–bile salts (TCBS)	04-JAN-2007	GACACTGATGGACGAAAGCGTGGGGAGCGAACGGGATTAGATACCCCGGTAGTCCACGCCGTAAACGATGGATACTAGCTGTGCGGCTTCGGCTGCGTGGCTAAGCGAAAGTGATAAGTATCCCACCTGGGGAGTACGTTCGCAAGAATGAAACTCAAAGGAATTGACGGGGGCCCGCACAAGCGGTGGAGCATGTGGTTTAATTCGATGATACGCGAGGAACCTTACCAGGGCTTAAATGTAGATTGCATGGTTTAGAGATAGACCTTTCTTCGGACCATCTACAAGGTGCTGCATGGTTGTCGTCAGCTCGTGCCGTGAGGTGTCAGGTTAAGTCCTATAACGAGCGCAACCCCTGTTGTTAGTTGCCAGCGAGTAATGTCGGGAACTCTAGCAAGA…	8F 1492R
b1cb3	EF207067	Koren & Rosenberg, 2008	Oculina patagonica	1–3			Sedot Yam, in the Mediterranean Sea off the coast of Israel		30		Bacteriodetes	Flavobacteriia	Flavobacteriales	Flavobacteriaceae	Winogradskyella	sp.	99	Marine agar, Vibrio-specific thiosulfate–citrate–bile salts (TCBS)	04-JAN-2007	TAGTTAAAATATGTAGTGTAGCGGTGAAATGCATAGATATTACATAGAATACCGATTGCGAAGGCAGATTACTAACAATATATTGACACTGATGGACGAAAAGCGTGGGGAGCGAACAGGATTAGATACCCTGGTAGTCCACGCCGTAAACGATGGTCACTAGCTGTTCGGACTTCGGTCTGAGTGGCTAAGCGAAAGTGATAAGTGACCCACCTGGGGAGTACGTTCGCAAGAATGAAACTCAAAGGAATTGACGGGGGCCCGCACAAGCGGTGGAGCATGTGGTTTAATTCGATGATACGCGAGGAACCTTACCAGGGCTTAAATGTAAGTTGCATGATTTAGAGATAGATCTTTCTTCGGACTACTTACAAGGTGCTGCATGGTTGTCGTCAGCTC…	8F 1492R
c1cb19	EF207118	Koren & Rosenberg, 2008	Oculina patagonica	1–3			Sedot Yam, in the Mediterranean Sea off the coast of Israel		30		Bacteriodetes	Flavobacteriia	Flavobacteriales	Flavobacteriaceae			99	Marine agar, Vibrio-specific thiosulfate–citrate–bile salts (TCBS)	04-JAN-2007	TTAGCTCAGTGACTAAGCGAAAGTGATAAGTGTCCCACCTGGGGAGTACGGTCGCAAGATTGAAACTCAAAGGAATTGACGGGGGCCCGCACAAGCGGTGGAGCATGTGGTTTAATTCGATGATACGCGAGGAACCTTACCAGGGCTTAAATGTAGGATGCATTAGCTAGAGATAGCTATTTCTTCGGACTTCTTACAAGGTGCTGCATGGTTGTCGTCAGCTCGTGCCGTGAGGTGTCAGGTTAAGTCCTATAACGAGCGCAACCCCTATTTTTAGTTGCTAACAGGTTAAGCTGAGGACTCTAAAGAGACTGCCGGTGCAAACCGTGAGGAAGGTGGGGATGACGTCAAATCATCACGGCCCTTACGTCCTGGGCTACACACGTGCTACAATGGTAT…	8F 1492R
c1cb39	EF207129	Koren & Rosenberg, 2008	Oculina patagonica	1–3			Sedot Yam, in the Mediterranean Sea off the coast of Israel		30		Bacteriodetes	Cytophagia	Cytophagales	Cytophagaceae			97	Marine agar, Vibrio-specific thiosulfate–citrate–bile salts (TCBS)	04-JAN-2007	ACTCGGATGTTGGGCGATATACTGTCAGCGTCCAAGCGAAAAGCGTTAAGTAATCCCACCTGGGGAGTACGCTCGCAAGAGTGAAACTCAAAGGAATTGACGGGGGTCCGCACAAGCGGTGGAGCATGTGGTTTAATTCGATGATACGCGAGGAACCTTACCTGGGCTCGAATTCATAGTGAATTATTTAGAAATAGATAAGTCTTCGGACACTATGGAAGGTGCTGCATGGCTGTCGTCAGCTCGTGCCGTGAGGTGTTGGGTTAAGTCCCGCAACGAGCGCAACCCCTACTGTTAGTTGCCAGCATGTTATGATGGGGACTCTAACAGGACTGCCTGCGCAAGCAGAGAGGAAGGAGGGGACGACGTCAAGTCATCATGGCCCTTACGCCCAGGGCT…	8F 1492R
c1cb42	EF207130	Koren & Rosenberg, 2008	Oculina patagonica	1–3			Sedot Yam, in the Mediterranean Sea off the coast of Israel		30		Bacteriodetes	Flavobacteriia	Flavobacteriales	Flavobacteriaceae			97	Marine agar, Vibrio-specific thiosulfate–citrate–bile salts (TCBS)	04-JAN-2007	GACACTGATGGACGAAAGCGTGGGGAGCGAACGGGATTAGATACCCCGGTAGTCCACGCCGTAAACGATGGATACTAGCTGTGCGGCTTCGGCTGCGTGGCTAAGCGAAAGTGATAAGTATCCCACCTGGGGAGTACGTTCGCAAGAATGAAACTCAAAGGAATTGACGGGGGCCCGCACAAGCGGTGGAGCATGTGGTTTAATTCGATGATACGCGAGGAACCTTACCAGGGCTTAAATGTAGATTGCATGGTTTAGAGATAGACCTTTCTTCGGACCATCTACAAGGTGCTGCATGGTTGTCGTCAGCTCGTGCCGTGAGGTGTCAGGTTAAGTCCTATAACGAGCGCAACCCCTGTTGTTAGTTGCCAGCGAGTAATGTCGGGAACTCTAGCAAGA…	8F 1492R
c1cc47	EF207147	Koren & Rosenberg, 2008	Oculina patagonica	1–3			Sedot Yam, in the Mediterranean Sea off the coast of Israel		30		Bacteriodetes	Flavobacteriia	Flavobacteriales	Flavobacteriaceae			99	Marine agar, Vibrio-specific thiosulfate–citrate–bile salts (TCBS)	04-JAN-2007	AGGCTTGCAGGGGGTGGAGACACCCCTTTCTTNGGACTGCCCTGCAAGNTGCTGCATGGTTGTCGTCAGCTCGTGCCGTGAGGTGTCAGGTTAAGTCCTATAACGAGCGCAACCCCTACCGTTAGTTGCCAGCGAGTCAAGTCGGGGACTCTAACGGGACTGCCGGTGCAAACCGTGAGGAAGGTGGGGACGACGTCAAATCATCACGGCCCTTACGTCCTGGGCTACACACGTGCTACAATGGCCGGCACAGAGGGAAGCCACCCCGCGAGGGGGAGCGGATCTACAAAACCGNTCACAGTTCGGATCGGGGTCTGCAACTCGACCCCGTGAAGCTGGAATCGCTAGTAATCGGATATCAGCCATGATCCGGTGAATACGTTCCCGGGCCTTGTACAC…	8F 1492R
c1cc55	EF207150	Koren & Rosenberg, 2008	Oculina patagonica	1–3			Sedot Yam, in the Mediterranean Sea off the coast of Israel		30		Bacteriodetes	Flavobacteriia	Flavobacteriales	Flavobacteriaceae			98	Marine agar, Vibrio-specific thiosulfate–citrate–bile salts (TCBS)	04-JAN-2007	AGGCAGATTACTAATAATGTACTGACACTGATGGACGAAAGCGTGGGGAGCGAACGGGATTAGATACCCCGGTAGTCCACGCCGTAAACGATGGATACTAGCTGTTCGGCTTCGGCTGAGTGGCTAAGCGAAAGTGATAAGTATCCCACCTGGGGAGTACGTTCGCAAGAATGAAACTCAAAGGAATTGACGGGGGCCCGCACAAGCGGTGGAGCATGTGGTTTAATTCGATGATACGCGAGGAACCTTACCAGGGCTTAAATGTAAGTTGCATTAGTTAGAGATAGCTATTTCTTCGGACTACTTACAAGGTGCTGCATGGTTGTCGTCAGCTCGTGCCGTGAGGTGTCAGGTTAAGTCCTATAACGAGCGCAACCCCTGTTGTTAGTTGCCAGCATG…	8F 1492R
c1cc58	EF207151	Koren & Rosenberg, 2008	Oculina patagonica	1–3			Sedot Yam, in the Mediterranean Sea off the coast of Israel		30		Bacteriodetes	Flavobacteriia	Flavobacteriales	Flavobacteriaceae			96	Marine agar, Vibrio-specific thiosulfate–citrate–bile salts (TCBS)	04-JAN-2007	CACTAACAACGTACTGACACTGATGGACGAAAGCGTGGGGAGCGAACGGGATTAGATACCCCGGTAGTCCACGCCGTAAACGATGGATACTAGCTGTGCGGCTTTGGCTGCGTGGCTAAGCGAAAGTGATAAGTATCCCACCTGGGGAGTACGTTCGCAAGAATGAAACTCAAAGGAATTGACGGGGGCCCGCACAAGCGGTGGAGCATGTGGTTTAATTCGATGATACGCGAGGAACCTTACCAGGGCTTAAATGTAGATTGCATTAGCTGGAGACAGCTATTTCTTCGGACCATCTACAAGGTGCTGCATGGTTGTCGTCAGCTCGTGCCGTGAGGTGTCAGGTTAAGTCCTATAACGAGCGCAACCCCTGTTGTTAGTTGCCAGCATGTAAAGATG…	8F 1492R
PORF_11	JF739861	Roik, Rahn, Hentschel	Porites lutea				reef flat, andaman sea, thailand			unpublished	Bacteriodetes	Flavobacteria	Flavobacteriales	Flavobacteriaceae	Gaetbulibacter	lutimaris	0.9318	MarineBroth 37,4g/L; 15g/L Agar (ca. 25ppt Salz)	11.FEB.2019	TGAGTTTGATCCTGGCTCAGGATGAACGCTAGCGGCAGGCCTAACACATGCAAGTCGAGG GGTAACAGGGTTGCTTGCAACCGCTGACGACCGGCGCACGGGTGCGTAACGCGTATACAA TCTACCTTTTGCTGCGGGATAGCCCAGAGAAATTTGGATTAATACCGCATGGTATGTAAA TAAGGCATCTTAATTACATTAAAGGTTACGGCAAAAGATGAGTATGCGTTCTATTAGCTA GATGGTAAGGTAACGGCTTACCATGGCCACGATAGATAGGGGCCCTGAGAGGGGGATCCC CCACACTGGTACTGAGACACGGACCAGACTCCTACGGGAGGCAGCAGTGAGGAATATTGG ACAATGGAGGGAACTCTGATCcAGCCaTGCCGC…	27F 1492R	unpublished
PORF_12	DQ001321.1	Roik, Rahn, Hentschel	Porites lutea				reef flat, andaman sea, thailand			unpublished	Bacteriodetes	Flavobacteria	Flavobacteriales	Flavobacteriaceae	Psychroserpens	mesophilus	0.9469	MarineBroth 18g/L; 19,8g/L TropicMarineSalt; 17g/L Agar (ca.32ppt Salz)	11.FEB.2019	TGAGTTTGATCCTGGCTCAGGATGAACGCTAGCGGCAGGCCTAACACATGCAAGTCGAGG GGCAGCATAGATTGCTTGCAATCTGATGGCGACCGGCGCACGGGTGCGTAACGCGTATAC AATCTACCTTTTGCTGAGGGATAGCCCAGAGAAATTTGGATTAATACCTCATAGTATTAT TAAGAGGCATCTTTTGATAATTAAAGGATACGGCAAAAGATGAGTATGCGTTCTATTAGC TAGTAGGTGTGGTAACGGCATACCTAGGCAACGATAGATAGGGGCCCTGAGAGGGGGATC CCCCACACTGGTACTGAGACACGGACCAGACTCCTACGGGAGGCAGCAGTGAGGAATATT GGTCAATGGACGCAAGTCTGAACcAGCCaTGCC…	27F 1492R	unpublished
PORF_13	NR_151976.1 KU923830.1	Roik, Rahn, Hentschel	Porites lutea				reef flat, andaman sea, thailand			unpublished	Bacteriodetes	Flavobacteria	Flavobacteriales	Flavobacteriaceae	Pseudotenacibaculum	haliotis	0.9906	MarineBroth 18g/L; 19,8g/L TropicMarineSalt; 17g/L Agar (ca.32ppt Salz)	11.FEB.2019	TGGTTACCTTGTTACGACTTAGCCCCTAGTTACTAGTTTTACCCTAGGCGGCTCCTTGCG GTGACCGACTTCAGGCACCCCCAGCTTCCATGGCTTGACGGGCGGTGTGTACAAGGCCCG GGAACGTATTCACCGGATCATGGCTGATATCCGATTACTAGCGATTCCAGCTTCACGGAG TCGAGTTGCAGACTCCGATCCGAACTGTGATATAGTTTGTAGATTCGCTCCTACTCGCGT AGTGGCTGCTCATTGTCTATACCATTGTAGCACGTGTGTAGCCCAGGACGTAAGGGCCGT GATGATTTGACGTCATCCCCACCTTCCTCACGGTTTGCACCGGCAGTCTCGCTAGAGTCC CCAACTTTACTTGCTGGCAACTAACGACAAGGG…	27F 1492R	unpublished
PORF_20	AF469612.1	Roik, Rahn, Hentschel	Porites lutea				reef flat, andaman sea, thailand			unpublished	Bacteriodetes	Flavobacteria	Flavobacteriales	Flavobacteriaceae	Tenacibaculum	cellulophagum	0.9891	MarineBroth 18g/L; 19,8g/L TropicMarineSalt; 1g/L Taurine (Sigma Art.Nr.T8691); 17g/L Agar (ca.32ppt Salz)	11.FEB.2019	TGAGTTTGATCCTGGCTCAGGATGAACGCTAGCGGCAGGCTTAACACATGCAAGTCGAGG GGTAACAGGGAGAAGCTTGCTTTTCTGCTGACGACCGGCGAACGGGTGCGTAACGCGTAT AGAATCTGCCTTGTACAGGAGGATAGCCTTTAGAAATGAAGATTAATACTCCATAGTGTA TGGAAGTGGCATCACTTTCTTACTAAAGATTTATTGGTACAAGATGACTATGCGTCCTAT TAGCTAGATGGTAAGGTAACGGCTTACCATGGCTACGATAGGTAGGGGGTCTGAGAGGAC TATCCCCCACACTGGTACTGAGACACGGACCAGACTCCTACGGGAGGCAGCAGTGAGGAA TATTGGTcAaTGGAGGCaACTCTGaACCaGCCa…	27F 1492R	unpublished
PORF_21	DQ822567.1	Roik, Rahn, Hentschel	Porites lutea				reef flat, andaman sea, thailand			unpublished	Bacteriodetes	Flavobacteria	Flavobacteriales	Flavobacteriaceae	Tenacibaculum	litopenaei	0.9986	MarineBroth 18g/L; 19,8g/L TropicMarineSalt; 17g/L Agar (ca.32ppt Salz)	11.FEB.2019	TGAGTTTGATCCTGGCTCAGGATGAACGCTAGCGGCAGGCTTAACACATGCAAGTCGAGG GGCAGCGTAGATTGCTTGCAATCTGACGGCGACCGGCGAACGGGTGCGTAACGCGTATAG AATCTGCCTTGTACAGGAGGATAGCCTTTAGAAATGAAGATTAATACTCCATAATGCTGA GAGATGGCATCATTTTTTAGTTAAAGATTTATCGGTACAAGATGACTATGCGTCCTATTA GCTAGATGGTAAGGTAACGGCTTACCATGGCAACGATAGGTAGGGGGTCTGAGAGGATTA TCCCCCACACTGGTACTGAGACACGGACCAGACTCCTACGGGAGGCAGCAGTGAGGAATA TTGGTcAaTGGGCGCAaGCCTGAACcAGCCaTG…	27F 1492R	unpublished
PORF_22	AF469612.1	Roik, Rahn, Hentschel	Porites lutea				reef flat, andaman sea, thailand			unpublished	Bacteriodetes	Flavobacteria	Flavobacteriales	Flavobacteriaceae	Tenacibaculum	cellulophagum	0.9816	MarineBroth 18g/L; 19,8g/L TropicMarineSalt; 17g/L Agar (ca.32ppt Salz)	11.FEB.2019	TGAGTTTGATCCTGGCTCAGGATGAACGCTAGCGGCAGGCTTAACACATGCAAGTCGAGG GGTAACAGGGAGAAGCTTGCTTTTCTGCTGACGACCGGCGAACGGGTGCGTAACGCGTAT AGAATCTGCCTTGTACAGGAGGATAGCCTTTAGAAATGAAGATTAATACTCCATAATGTA GGGAAGTGGCATCGCTATCTTACTAAAGATTTATCGGTACAAGATGACTATGCGTCCTAT TAGCTAGATGGTAAGGTAACGGCTTACCATGGCTACGATAGGTAGGGGGTCTGAGAGGAT TATCCCCCACACTGGTACTGAGACACGGACCAGACTCCTACGGGAGGCAGCAGTGAGGAA TATTGGTcAaTGGAGGCaACTCTGAACCaGCCa…	27F 1492R	unpublished
PORF_25	AF469612.1	Roik, Rahn, Hentschel	Porites lutea				reef flat, andaman sea, thailand			unpublished	Bacteriodetes	Flavobacteria	Flavobacteriales	Flavobacteriaceae	Tenacibaculum	cellulophagum	0.9823	MarineBroth 37,4g/L; 15g/L Agar (ca. 25ppt Salz)	11.FEB.2019	TGAGTTTGATCCTGGCTCAGGATGAACGCTAGCGGCAGGCTTAACACATGCAAGTCGAGG GGTAACAGAGAGAAGCTTGCTTTTCTGCTGACGACCGGCGAACGGGTGCGTAACGCGTAT AGAATCTGCCTTGTACAGGAGGATAGCCTTTAGAAATGAAGATTAATACTCCATAATGTA GGGAAGTGGCATCACTATCTTACTAAAGATTTATCGGTACAAGATGACTATGCGTCCTAT TAGCTAGATGGTAAGGTAACGGCTTACCATGGCTACGATAGGTAGGGGGTCTGAGAGGAT TATCCCCCACACTGGTACTGAGACACGGACCAGACTCCTACGGGAGGCAGCAGTGAGGAA TATTgGTcAaTGGAGGCaACTCTGaACcaGCCa…	27F 1492R	unpublished
PORF_27	AB247554.1	Roik, Rahn, Hentschel	Porites lutea				reef flat, andaman sea, thailand			unpublished	Bacteriodetes	Cytophagia	Cytophagales	Flammeovirgaceae	Flammeovirga	yaeyamensis	0.9959	MarineBroth 37,4g/L; 15g/L Agar (ca. 25ppt Salz)	11.FEB.2019	TGAGTTTGATCCTGGCTCAGGATGAACGCTAGCGGCAGGCCTAATACATGCAAGTCGAGG GGTAACATGATCTGCTTGCAGATTGATGACGACCGGCGCACGGGTGCGTAACGCGTATAT AACTTGCCTCATACTGGAGAATAGCCCGGAGAAATTCGGATTAATGCTCCATAGTATTAT AAAGTAGCATTGCTTAATAATTAAAGATTTATCGGTATGAGATAGATATGCGTCCCATTA GCTAGTTGGTGGAGGTAACGGCTCACCAAGGCGACGATGGGTAGGGGTTCTGAGAGGAAG GTCCCCCACACTGGCACTGAGATACGGGCCAGACTCCTACGGGAGGCAGCAGTAGGGAAT ATTgGTcAaTGGAGGCaACTCTGaACCaGCCaT…	27F 1492R	unpublished
PORF_28	FJ750453.1 KF282348.1	Roik, Rahn, Hentschel	Porites lutea				reef flat, andaman sea, thailand			unpublished	Bacteriodetes	Flavobacteria	Flavobacteriales	Flavobacteriaceae	Aquimarina	agarilytica	93.80% 99.21%	MarineBroth 18g/L; 19,8g/L TropicMarineSalt; 17g/L Agar (ca.32ppt Salz)	14.FEB.2019	TGAGTTTGATCCTGGCTCAGGATGAACGCTAGCGGCAGGCTTAACACATGCAAGTCGAGG GGTAACAGGGTTGCTTGCAACCGCTGACGACCGGCGCACGGGTGCGTAACGCGTATACAA TCTACCTTACACTGAGGGATAGCCCAGAGAAATTTGGATTAATACCTCATGGTATTATTG AGTGGCATCACTTAATAATTAAAGGTTACGGTGTAAGATGAGTATGCGTCCTATTAGCTA GTTGGTGTGGTAACGGCACACCAAGGCGACGATAGGTAGGGGTCCTGAGAGGGAGATCCC CCACACTGGTACTGAGACACGGACCAGACTCCTACGGGAGGCAGCAGTGAGGAATATTGG ACAATGGAGGCaACTCTGATCcAGCCaTGCCGC…	27F 1492R	unpublished
PORF_29	NR_149249.1 KR080554.1	Roik, Rahn, Hentschel	Porites lutea				reef flat, andaman sea, thailand			unpublished	Bacteriodetes	Flavobacteria	Flavobacteriales	Flavobacteriaceae	Seonamhaeicola	algicola	0.9473	MarineBroth 37,4g/L; 15g/L Agar (ca. 25ppt Salz)	14.FEB.2019	tCGTACgGCTaCCTTGTTACGACTTAGCCCTAGTTACCGATTTTACCCTAGGCCGCTCCT TACGGTGACGGACTTCAGGCACTCCCAGCTTCCATGGCTTGACGGGCGGTGTGTACAAGG CCCGGGAACGTATTCACCGGATCATGGCTGATATCCGATTACTAGCGATTCCAGCTTCAC GGAGTCGAGTTGCAGACTCCGATCCGAACTGAGACCGGTTTTATAGATTCGCTCTACCTC GCGGTATGGCTGCTCATTGTACCGGCCATTGTAGCACGTGTGTAGCCCAGGACGTAAGGG CCGTGATGATTTGACGTCATCCCCACCTTCCTCACGGTTTGCACCGGCAGTCTTGTTAGA GTTCCCGACATTACTCGCTGGCAACTAACAACA…	27F 1492R or 1525R or 1387R	unpublished
PORF_31	CP011071.1 GU118862.1	Roik, Rahn, Hentschel	Porites lutea				reef flat, andaman sea, thailand			unpublished	Bacteriodetes	Flavobacteria	Flavobacteriales	Flavobacteriaceae	Muricauda	lutaonensis	95.24% 99.72%	MarineBroth 18g/L; 19,8g/L TropicMarineSalt; 1g/L Taurine (Sigma Art.Nr.T8691); 17g/L Agar (ca.32ppt Salz)	14.FEB.2019	CGTACGGCTaCCTTGTTACGACTTAGCCCTAGTTACCGGTCTTGCcCTAGGCcGCTCCTC GCGGTGACgGACTtCAGGCACTCCCGGCTTCCATGGCTTGACGGGCGGTGTGTACAAGGC CCGGGAACGTATTCACCGCACCATGGCTGATGTGCGATTACTAGCGATTCCAGCTTCACG GGGTCGAGTTGCAGACCCCGATCCGAACTGAGACCGGCTTTGTAGATCCGCTCCCCCTCA CGGGGTGGCTTCCCTCTGTACCGGCCATTGTAGCACGTGTGTGGCCCAGGACGTAAGGGC CGTGATGATTTGACGTCGTCCCCACCTTCCTCACGGTTTGCACCGGCAGTCCCGTTAGAG TCCCCATCTTTACATGCTGGCAACTAACGGCAG…	27F 1492R or 1525R or 1387R	unpublished
PORF_35	AY848823.1	Roik, Rahn, Hentschel	Porites lutea				reef flat, andaman sea, thailand			unpublished	Bacteriodetes	Flavobacteria	Flavobacteriales	Flavobacteriaceae	Winogradskyella	poriferorum	0.9705	MarineBroth 18g/L; 19,8g/L TropicMarineSalt; 17g/L Agar (ca.32ppt Salz)	19.FEB.2019	GGCACTCCCAGCTTCCATGGCTTGACGGGCGGTGTGTACAAGGCCCGGGAACGTATTCAC CGGATCATGGCTGATATCCGATTACTAGCGATTCCAGCTTCACGGAGTCGAGTTGCAGAC TCCGATCCGAACTGAGATATAGTTTATAGATTCGCTCCTTCTCGCGAAGTGGCTGCTCAT TGTCTATACCATTGTAGCACGTGTGTAGCCCAGGACGTAAGGGCCGTGATGATTTGACGT CATCCCCACCTTCCTCACGGTTTGCACCGGCAGTCTTGCTAGAGTTCCCATCTTTACATG CTGGCAACTAACAACAGGGGTTGCGCTCGTTATAGGACTTAACCTGACACCTCACGGCAC GAGCTGACGACAACCATGCAGCACCTTGTAGAT…	27F 1492R	unpublished
PORF_40	NR_149249.1 KR080554.1	Roik, Rahn, Hentschel	Porites lutea				reef flat, andaman sea, thailand			unpublished	Bacteriodetes	Flavobacteria	Flavobacteriales	Flavobacteriaceae	Seonamhaeicola	algicola	0.9304	MarineBroth 18g/L; 19,8g/L TropicMarineSalt; 1g/L Taurine (Sigma Art.Nr.T8691); 17g/L Agar (ca.32ppt Salz)	25.FEB.2019	CGATTTTACCCTAGGCCGCTCCTTGCGGTGACGGACTTCAGGCACTCCCAGCTTCCATGG CTTGACGGGCGGTGTGTACAAGGCCCGGGAACGTATTCACCGGATCATGGCTGATATCCG ATTACTAGCGATTCCAGCTTCACGGGGTCGAGTTGCAGACCCCGATCCGAACTGAGACCG GTTTTCTAGATTCGCTCTGCCTTGCGGCATGGCTGCTCATTGTACCGGCCATTGTAGCAC GTGTGTAGCCCAGGACGTAAGGGCCGTGATGATTTGACGTCATCCCCACCTTCCTCACGG TTTGCACCGGCAGTCTTGTTAGAGTTCCCGACTTCACTCGCTGGCAACTAACAACAGGGG TTGCGCTCGTTATAGGACTTAACCTGACACCTC…	27F 1492R	unpublished
Culture 8	DQ312231	N. Webster et al., 2006	Alcyonium antarcticum				McMurdo Sound, Ross Sea, Antarctica. Collection sites were McMurdo Station intake jetty (MM) (S77°51.02′, E166°39.56′), Scott Base (SB) (S77°51.05′, E166°45.54′) and Cape Armitage (CA) (S77°51.55′, E166°40.74′)	tissue (soft coral)	4		Bacteroidetes	Flavobacteriia	Flavobacteriales	Flavobacteriaceae	Brizionia	sp.	93	1/10 strength Nutrient Agar in seawater	01-DEC-2005	GACCGGCGCACGGGTGCGTAACGCTATACATCTACCTTTACAGTGGGATAGCCTTTAGAAATAAGATAATACCGCATAGTTGGCATCATAAAGATTTATCGGTAAAAGATGAGTATGGTTCTATTAGCTAGATGGTGTGGTAACGGCCACCATGGCTACGATAGATAGGGGCCCTGAGAGGGGGATCCCCCACACTGGTACTGAGACACGGACCAGACTCCTACGGGAGGCAGCAGTGAGGAATATTGGACAATGGGCGAGAGCCTGATCCAGCCATGCCGCGTGCAGGACGACTGCCTATGGGTTGTAAACTGCTTTTATAAGGAAGAACACCCGCGTGGGGCTGACGGTACTTAAGAATAAGGATCGGCTAACTCCGTGCCAGCAGCCGCGGTAATA…	27f 1406r
Culture 9	DQ312232	N. Webster et al., 2006	Alcyonium antarcticum				McMurdo Sound, Ross Sea, Antarctica. Collection sites were McMurdo Station intake jetty (MM) (S77°51.02′, E166°39.56′), Scott Base (SB) (S77°51.05′, E166°45.54′) and Cape Armitage (CA) (S77°51.55′, E166°40.74′)	tissue (soft coral)	4		Bacteroidetes	Cytophagia	Cytophagales	Cyclobacteriaceae	Algoriphagus	sp.	94	Marine agar	01-DEC-2005	AGAGTGGCGAACGGGTGCGTAACGCTATGCACCTACCCATACAGGGGGATAGCCCGGAGAAATTGGATAATACCCCATGGTAGGCATTTTAAAGATTCATCGGTATAGGATGGGCATGGTCTGATTAGCTAGTTGGCGGTGTAACGGACACCAAGGCTACGATCAGTAGGGGTTCTGAGAGGAAGGTCCCCCACACTGGCACTGAGATACGGGCCAGACTCCTACGGGAGGCAGCAGTAGGGAATATTGGGCAATGGACGAGAGTCTGACCCAGCCATGCCGCGTGCAGGAAGACGGCGTCTGCGTTGTAAACTGCTTTTATCGGGAAGAAAATGCCTGCGGAAATGCCGGTACCGATGAATAAGCACCGGCTAACTCCGTGCCAGCAGCCGCGGTAAT…	27f 1406r
6229-C3	HM173311	Gray et al., 2011	Paragorgia arborea				Cape Moffet Garden (51151.6940 N/1761 49.9960 W)	tissue and skeleton were cut, diced, and blended into a slurry	21 or 4 C		Bacteroidetes	Flavobacteriia	Flavobacteriales	Flavobacteriaceae	Flavobacterium	sp.	99	Vibrio-specific thiosulfate–citrate–bile salts (TCBS) agar, and glycerol artificial seawater agar (GASWA)	30-APR-2010	GCAAGTCGAGGGGTATGGTTCTTCGGAACCAGAGACCGGCGCACGGGTGCGTAACGCGTATGCAATCTACCTTTCACAGAGGGATAGCCCAGAGAAATTTGGATTAATACCTCATAGTATATTGGTCTCGCATGAGATTGTTATTAAAGATTTATCGGTGAAAGATGAGCATGCGTCCCATTAGTTAGTTGGTAAGGTAACGGCTTACCAAGACTACGATGGGTAGGGGTCCTGAGAGGGAGATCCCCCACACTGGTACTGAGACACGGACCAGACTCCTACGGGAGGCAGCAGTGAGGAATATTGGACAATGGGCGCAAGCCTGATCCAGCCATGCCGCGTGCAGGATGACGGTCCTATGGATTGTAAACTGCTTTTATACGAGAAGAAACACTGGTT…	Eco8F 1492R
w1cb16	DQ416613	Koren & Rosenberg (2006)	Oculina patagonica				Sedot Yam, in the Mediterranean off the coast of Israel				Bacteroidetes	Flavobacteriia	Flavobacteriales	Flavobacteriaceae	Polaribacter	sp.	100	Marine agar	27-FEB-2006	GACGCTCATGGACGAAAGCGTGGGGAGCGAACAGGATTAGATACCCTGGTAGTCCACGCCGTAAACGATGGACACTAGTTGTTGGGATTTATCTCAGTGACTAAGCGAAAGTGATAAGTGTCCCACCTGGGGAGTACGATCGCAAGATTGAAACTCAAAGGAATTGACGGGGGCCCGCACAAGCGGTGGAGCATGTGGTTTAATTCGATGATACGCGAGGAACCTTACCAGGGCTTAAATGTAGTCTGACAGCTTTAGAGATAGAGTTTTCTTCGGACAGATTACAAGGTGCTGCATGGTTGTCGTCAGCTCGTGCCGTGAGGTGTCAGGTTAAGTCCTATAACGAGCGCAACCCTTGTCGTTAGTTGCCAGCATGTAAAGATGGGGACTCTAACGAGA…	8F 1492R
w3cb14	DQ416664	Koren & Rosenberg (2006)	Oculina patagonica				Sedot Yam, in the Mediterranean off the coast of Israel				Bacteroidetes	Flavobacteriia	Flavobacteriales	Flavobacteriaceae	Polaribacter	sp.	98	Marine agar	27-FEB-2006	CGGCAGGCTTAACACATGCAAGTCGAGGGGTAACAGGGGAGCTTGCTTCCGCTGACGACCGGCGCACGGGTGCGTAACGCGTATAGAACCTACCTTTTACAGAGGGATAGCCTTTAGAAATGAAGATTAATACCTCATAGTATTGCGAGATGGCATCATTTTGTAATTAAAGATTTATCGGTAAAAGATGGCTATGCGTCCTATTAGCTAGATGGAGAGGTAACGGCTCCCCATGGCAATGATAGGTAGGGGTCCTGAGAGGGAGATCCCCCACACTGGTACTGAGACACGGACCAGACTCCTACGGGAGGCAGCAGTGAGGAATATTGGGCAATGGAGGCAACTCTGACCCAGCCATGCCGCGTGCAGGAAGACTGCCCTATGGGTTGTAAACTGCTT…	8F 1492R
3D706	JF411512	Chiu et al., 2012	skeletal tissue growth anomalies in the coral Platygyra carnosus				Hoi Ha Wan Marine Park (HHWMP) and Port Shelter (PS)		20		Bacteroidetes	Flavobacteriia	Flavobacteriales	Flavobacteriaceae	Mesoflavibacter	sp.	99	Custom media: ASW + agar, peptone, yeast extract	15-FEB-2011	CGCTTACCATGCAAGTCGAGGGGTAACAGAAAAAAGCTTGCTTTTTTGCTGACGACCGGCGAACGGGTGCGTAACGCGTATGCAATCTACCTTTTGCTAAGGGATAGCCCAGAGAAATTTGGATTAATACCTTATAGTATACTTACTTGGCATCGAGAAAGTATTAAAGATTACGGCAAAAGATGAGCATGCGTTCTATTAGCTAGTTGGTGTGGTAACGGCATACCAAGGCAACGATAGATAGGGGTCCTGAGAGGGAGATCCCCCACACTGGTACTGAGACACGGACCAGACTCCTACGGGAGGCAGCAGTGAGGAATATTGGACAATGGAGGCAACTCTGATCCAGCCATGCCGCGTGCAGGAAGACTGCCCTATGGGTTGTAAACTGCTTTTATA…	26F 785R, 355F 1055R, 927F 1492R
UST991130-045	AF465362	Harder et al., 2003	Dendronephthya sp.	5-10			Port Shelter, Hong Kong (N 22P 20Q, E 114P 20Q)		30		Bacteroidetes	Cytophagia	Cytophagales	Cytophagaceae	Flexibacter	sp.	98	Nutrient agar (NA)	05-JAN-2002	AGGAGATTTGGTCAATGGAGGCAACTCTGAACCAGCCTGCCGCGTGCAGGAAGACTGCCCTATGGGTTGTAAACTGCTTTTATACAGGAAGAAACTTATCCACGTGTGGGTAACTGACGGTACTGTAAGAATAAGCACCGGCTAACTCCGTGCCAGCAGCCGCGGTAATACGGAGGGTGCAAGCGTTATCCGGAATCATTGGGTTTAAAGGGTCCGCAGGCGGTCAATTAAGTCAGAGGTGAAATCCTACAGCTTAACTGTAGAACTGCCTTTGATACTGGTTGACTTGAGTCATATGGAAGTAGATAGAATGTGTAGTGTAGCGGTGAAATGCATAGATATTACACAGAATACCGATTGCGAAGGCAGTCTACTACGTATGTACTGACGCTCATGGAC…	355F 1055R
UST991130-047	AF465364	Harder et al., 2003	Dendronephthya sp.	5-10			Port Shelter, Hong Kong (N 22P 20Q, E 114P 20Q)		30		Bacteroidetes	Flavobacteriia	Flavobacteriales	Flavobacteriaceae	Tenacibaculum	sp.	99	Nutrient agar (NA)	05-JAN-2002	GGAGATTTGGTCAATGGAGGCAACTCTGAACCAGCCTGCCGCGTGCAGGAAGACTGCCCTATGGGTTGTAAACTGCTTTTATACAGGAAGAAACAGATCTACGTGTAGGTCCTTGACGGTACTGTAAGAATAAGCACCGGCTAACTCCGTGCCAGCAGCCGCGGTAATACGGAGGGTGCAAGCGTTATCCGGAATCATTGGGTTTAAAGGGTCCGCAGGCGGTCAATTAAGTCAGAGGTGAAATCCCATAGCTTAACTATGGAACTGCCTTTGATACTGGTTGACTTGAGTTATACGGAAGTAGATAGAATAAGTAGTGTAGCGGTGAAATGCATAGATATTACTTAGAATACCGATTGCGAAGGCAGTCTACTACGTATATACTGACGCTCATGGACG…	355F 1055R
b1cb8	EF207070	Koren & Rosenberg, 2008	Oculina patagonica	1–3			Sedot Yam, in the Mediterranean Sea off the coast of Israel		30		Bacteroidetes	Flavobacteriia	Flavobacteriales	Flavobacteriaceae			99	Marine agar, Vibrio-specific thiosulfate–citrate–bile salts (TCBS)	04-JAN-2007	TAAAATATGTAGTGTAGCGGTGAAATGCATAGATATTACATAGAATACCAATTGCGAAGGCAGATCACTAATAATGTACTGACACTGATGGACGAAAGCGTGGGGAGCGAACGGGATTAGATACCCCGGTAGTCCACGCCGTAAACGATGGATACTAGCTGTTCGGCTTCGGCTGAGTGGCTAAGCGAAAGTGATAAGTATCCCACCTGGGGAGTACGTTCGCAAGAATGAAACTCAAAGGAATTGACGGGGGCCCGCACAAGCGGTGGAGCATGTGGTTTAATTCGATGATACGCGAGGAACCTTACCAGGGCTTAAATGTAAGTTGCATGATTTAGAGATAGATCTTTCTTCGGACTACTTACAAGGTGCTGCATGGTTGTCGTCAGCTCGTGCCGT…	8F 1492R
b1cb39	EF207076	Koren & Rosenberg, 2008	Oculina patagonica	1–3			Sedot Yam, in the Mediterranean Sea off the coast of Israel		30		Bacteroidetes	Flavobacteriia	Flavobacteriales	Flavobacteriaceae			99	Marine agar, Vibrio-specific thiosulfate–citrate–bile salts (TCBS)	04-JAN-2007	GAACATTTGGTGTAGCGGTGAAATGCATAGATATCACATAGAACACCGATCGCGAAGGCAGGTAACCAACAACGTACTGACGCTGATGGACGAAAGCGTGGGTAGCGAACGGGATTAGATACCCCGGTAGTCCACGCCGTAAACGATGGATACTAGCTGTCGGGTCTTCGGACTCGGCGGCCAAGCGAAAGTGATAAGTATCCCACCTGGGGAGTACGTTCGCAAGAATGAAACTCAAAGGAATTGACGGGGGCCCGCACAAGCGGTGGAGCATGTGGTTTAATTCGATGATACGCGAGGAACCTTACCAGGGCTTAAATGTAACGGGACAGGCTTAGAGATAGGCTTTTCTTCGGACTCGTTACAAGGTGCTGCATGGTTGTCGTCAGCTCGTGCCGT…	8F 1492R
b1cc2	EF207078	Koren & Rosenberg, 2008	Oculina patagonica	1–3			Sedot Yam, in the Mediterranean Sea off the coast of Israel		30		Bacteroidetes	Flavobacteriia	Flavobacteriales	Flavobacteriaceae	Muricauda	sp.	99	Marine agar, Vibrio-specific thiosulfate–citrate–bile salts (TCBS)	04-JAN-2007	TCCACGCCGTAAACGATGGATACTAGCTGTCGGGACTTCGGTCTCGGCGGCCAAGCGAAAGTGATAAGTATCCCACCTGGGGAGTACGTTCGCAAGAATGAAACTCAAAGGAATTGACGGGGGCCCGCACAAGCGGTGGAGCATGTGGTTTAATTCGATGATACGCGAGGAACCTTACCAGGGCTTAAATGCGGGCTGCATGGGACAGAGACGTCCCTTTCTTCGGACCGCCCGCAAGGTGCTGCATGGTTGTCGTCAGCTCGTGCCGTGAGGTGTCAGGTTAAGTCCTATAACGAGCGCAACCCCTACCGTTAGTTGCCAGCATGTAAAGATGGGGACTCTAACGGGACTGCCGGTGCAAACCGTGAGGAAGGTGGGGACGACGTCAAATCATCACGG…	8F 1492R
b2cc1	EF207091	Koren & Rosenberg, 2008	Oculina patagonica	1–3			Sedot Yam, in the Mediterranean Sea off the coast of Israel		30		Bacteroidetes	Flavobacteriia	Flavobacteriales	Flavobacteriaceae	Aquimarina	sp.	97	Marine agar, Vibrio-specific thiosulfate–citrate–bile salts (TCBS)	04-JAN-2007	AGTCCACGCCGTAAACGATGGTCACTAGCTGTTCGTATTTCGGTATGAGTGGCTAAGCGAAAGTGATAAGTGACCCACCTGGGGAGTACGTTCGCAAGAATGAAACTCAAAGGAATTGACGGGGGCCCGCACAAGCGGTGGAGCATGTGGTTTAATTCGATGATACGCGAGGAACCTTACCAGGGCTTAAATGTAGTTTGACAGGGGTAGAGATACCTTTTTCTTCGGACAGATTACAAGGTGCTGCATGGTTGTCGTCAGCTCGTGCCGTGAGGTGTCAGGTTAAGTCCTATAACGAGCGCAACCCCTGTTGTTAGTTGCCAGCACGTAATGGTGGGAACTCTAGCAAGACTGCCGGTGCAAACCGTGAGGAAGGTGGGGATGACGTCAAATCATCAC…	8F 1492R
b3ca6	EF207098	Koren & Rosenberg, 2008	Oculina patagonica	1–3			Sedot Yam, in the Mediterranean Sea off the coast of Israel		30		Bacteroidetes	Flavobacteriia	Flavobacteriales	Flavobacteriaceae	Muricauda	sp.	98	Marine agar, Vibrio-specific thiosulfate–citrate–bile salts (TCBS)	04-JAN-2007	ACGGGGGGCCCGCACAAGCGNGTGGAGCATGTGGTTTAATTCGATGATACGCGAGGAACCTTACCAGGGCTTAAATGCAGTCCTGCATAGGGTAGAGATACCCTTTTCTTCGGACCGATTGCAAGGTGCTGCATGGTTGTCGTCAGCTCGTGCCGTGAGGTGTCAGGTTAAGTCCTATAACGAGCGCAACCCCTGCCGTTAGTTGCCAGCATGTAAAGATGGGGACTCTAACGGGACTGCCGGTGCAAACCGTGAGGAAGGTGGGGACGACGTCAAATCATCACGGCCCTTACGTCCTGGGCCACACACGTGCTACAATGGCCGGTACAGAGGGAAGCCACCCCGCGAGGGGGAGCGGATCTACAAAGCCGGTCTCAGTTCGGATCGGGGTCTGCAACT…	8F 1492R
b3ca38	EF207106	Koren & Rosenberg, 2008	Oculina patagonica	1–3			Sedot Yam, in the Mediterranean Sea off the coast of Israel		30		Bacteroidetes	Flavobacteriia	Flavobacteriales	Flavobacteriaceae	Muricauda	sp.	99	Marine agar, Vibrio-specific thiosulfate–citrate–bile salts (TCBS)	04-JAN-2007	ATGAAACTCAAAGGGAATTGACGGGGGGCCCCGCACAAGCGGTGGAGCATGTGGTTTAATTCGATGATACGNGAGGAACCTTACCAGGGCTTAAATGCATTATGACAGGTCTAGAGATAGACTTTTCTTCGGACATTTTGCAAGGTGCTGCATGGTTGTCGTCAGCTCGTGCCGTGAGGTGTCAGGTTAAGTCCTATAACGAGCGCAACCCCTACCGTTAGTTGCCAGCGAGTGATGTCGGGGACTCTAACGGGACTGCCGGTGCAAACCGTGAGGAAGGTGGGGATGACGTCAAATCATCACGGCCCTTACGTCCTGGGCCACACACGTGCTACAATGGCCGGTACAGAGGGAAGCCACCCCGCAAGGGGGCGCGGATCTATAAAACCGGTCACAGTT…	8F 1492R
c1cb4	EF207113	Koren & Rosenberg, 2008	Oculina patagonica	1–3			Sedot Yam, in the Mediterranean Sea off the coast of Israel		30		Bacteroidetes	Flavobacteriia	Flavobacteriales	Flavobacteriaceae	Aquimarina	sp.	99	Marine agar, Vibrio-specific thiosulfate–citrate–bile salts (TCBS)	04-JAN-2007	TGAGTGGCTAAGCGAAAGTGATAAGTAACCCACCTGGGGAGTACGTTCGCAAGAATGAAACTCAAAGGAATTGACGGGGGCCCGCACAAGCGGTGGAGCATGTGGTTTAATTCGATGATACGCGAGGAACCTTACCAGGGCTTAAATGTAGATTGACAGGTTTAGAGATAGACTTTTCTTCGGACAATTTACAAGGTGCTGCATGGTTGTCGTCAGCTCGTGCCGTGAGGTGTCAGGTTAAGTCCTATAACGAGCGCAACCCCTGTTGTTAGTTGCCATCGAGTAATGTCGGGAACTCTAGCAAGACTGCCGGTGCAAACCGCGAGGAAGGTGGGGATGACGTCAAATCATCACGGCCCTTACGTCCTGGGCCACACACGTGCTACAATGGCCGGTACA…	8F 1492R
c1cb33	EF207124	Koren & Rosenberg, 2008	Oculina patagonica	1–3			Sedot Yam, in the Mediterranean Sea off the coast of Israel		30		Bacteroidetes	Flavobacteriia	Flavobacteriales	Flavobacteriaceae	Aquimarina	sp.	99	Marine agar, Vibrio-specific thiosulfate–citrate–bile salts (TCBS)	04-JAN-2007	GCGTGGGTAGCGAACAGGATTAGATACCCTGGTAGTCCCACGCCGTAAACGATGGTTACTAGCTGTTCGGATTTTTATCTGAGTGGCTAAGCGAAAGTGATAAGTAACCCACCTGGGGAGTACGTTCGCAAGAATGAAACTCAAAGGAATTGACGGGGGCCCGCACAAGCGGTGGAGCATGTGGTTTAATTCGATGATACGCGAGGAACCTTACCAGGGCTTAAATGTAGATTGACAGGTTTAGAGATAGACTTTCCTTCGGGCAATTTACAAGGTGCTGCATGGTTGTCGTCAGCTCGTGCCGTGAGGTGTCAGGTTAAGTCCTATAACGAGCGCAACCCCTGTTGTTAGTTGCCAGCGAGTAAAGTCGGGAACTCTAACAAGACTGCCGGTGCAAAC…	8F 1492R
c1cb46	EF207132	Koren & Rosenberg, 2008	Oculina patagonica	1–3			Sedot Yam, in the Mediterranean Sea off the coast of Israel		30		Bacteroidetes	Flavobacteriia	Flavobacteriales	Flavobacteriaceae	Aquimarina	sp.	99	Marine agar, Vibrio-specific thiosulfate–citrate–bile salts (TCBS)	04-JAN-2007	TGGTTTAATTCGATGATACGCGAGGAACCTTACCAGGGCTTAAATGTAGTCTGACAGGTCTAGAGATAGACTTTTCTTCGGACAGATTACAAGGTGCTGCATGGTTGTCGTCAGCTCGTGCCGTGAGGTGTCAGGTTAAGTCCTATAACGAGCGCAACCCCTGTTGTTAGTTGCCATCGAGTAATGTCGGGAACTCTAGCAAGACTGCCGGTGCAAACCGCGAGGAAGGTGGGGATGACGTCAAATCATCACGGCCCTTACGTCCTGGGCCACACACGTGCTACAATGGTAGGTACAGAGAGCAGCCACTTGGTGACAAGGAGCGAATCTATAAAGCCTATCACAGTTCGGATCGGAGTCTGCAACTCGACTCCGTGAAGCTGGAATCGCTAGTAATCG…	8F 1492R
c1cc5	EF207139	Koren & Rosenberg, 2008	Oculina patagonica	1–3			Sedot Yam, in the Mediterranean Sea off the coast of Israel		30		Bacteroidetes	Flavobacteriia	Flavobacteriales	Flavobacteriaceae	Aquimarina	sp.	99	Marine agar, Vibrio-specific thiosulfate–citrate–bile salts (TCBS)	04-JAN-2007	TCAGGTTAAGTCCTATAACGAGCGCAACCCCTGTTGTTAGTTGCCAGCNGAGTGATGTCGGGAACTCTAGCAAGACTGCCGGTGCAAACCGCGAGGAAGGTGGGGATGACGTCAAATCATCACGGCCCTTACGTCCTGGGCCACACACGTGCTACAATGGCCGGTACACAGAGCAGCCACTTGGTGACAAGGAGCGAATCTATAAAGCCGGTCACAGTTCGGATCGGAGTCTGCAACTCGACTCCGTGAAGCTGGAATCGCTAGTAATCGGATATCAGCCATGATCCGGTGAATACGTTCCCGGGCCTTGTACACACCGCCCGTCAAGCCATGGAAGCTGGGGGTAC	8F 1492R
c1cc62	EF207152	Koren & Rosenberg, 2008	Oculina patagonica	1–3			Sedot Yam, in the Mediterranean Sea off the coast of Israel		30		Bacteroidetes	Flavobacteriia	Flavobacteriales	Flavobacteriaceae	Algibacter	sp.	99	Marine agar, Vibrio-specific thiosulfate–citrate–bile salts (TCBS)	04-JAN-2007	TAGATATTACATAGAATACCAATGCGAAGGCAGATCACTAATAATGTATTGACACTGATGGACGAAAGCGTAGGTAGCGAACGGGATTAGATACCCCGGTAGTCTACGCCGTAAACGATGGATACTAGCTGTTCGGAACTTGCTTCTGAGTGGCTAAGCGAAAGTGATAAGTATCCCACCTGGGGAGTACGTTCGCAAGAATGAAACTCAAAGGAATTGACGGGGGCCCGCACAAGCGGTGGAGCATGTGGTTTAATTCGATGATACGCGAGGAACCTTACCAGGGCTTAAATGTAGATTGACAGGACTAGAGATAGTTTTTTCTTCGGACAATTTACAAGGTGCTGCATGGTTGTCGTCAGCTCGTGCCGTGAGGTGTCAGGTTAAGTCCTATAACGA…	8F 1492R
KMM 6029	AY651070	Nedashkovskaya et al., 2005	Paragorgia arborea	128			Makarov Bay, Iturup Island, Kurile Islands, Sea of Okhotsk, Pacific Ocean		28	http://ijs.microbiologyresearch.org/content/journal/ijsem/10.1099/ijs.0.63381-0	Bacteroidetes	Flavobacteriia	Flavobacteriales	Flavobacteriaceae	Bizionia	paragorgiae	99	Marine agar	11-JUN-2004	CGCTAGCGGCAGGCTTAACACATGCAAGTCGAGGGGTAACGGGGTGCTTGCACCGCCGACGACCGGCGCACGGGTGAGTAACGCGTATACAATCTGCCTTGTACTGAGGGATAGCCCAGAGAAATTTGGATTAATACCTCATAGTATATGGCNNTCTCATGAAGATCATATTAAAGGTTACGGTACAAGATGAGTATGCGTTCTATTAGCTAGATGGTAAGGTAACGGCTTACCATGGCTACGATAGATAGGGGCCCTGAGAGGGGGATCCCCCACACTGGTACTGAGACACGGACCAGACTCCTACGGGAGGCAGCAGTGAGGAATATTGGACAATGGGCGAGAGCCTGATCCAGCCATGCCGCGTGCAGGATGACGGCCCTATGGGTTGTAAACTGC…	p27f p152Sr	http://ijs.microbiologyresearch.org/content/journal/ijsem/10.1099/ijs.0.63381-0
LM0505	DQ517219	Bru ̈ck et a;/. 2007	Leptogorgia minimata	45		27	Jim Atria wreck site off Pompano Beach, Florida		27		Bacteroidetes	Sphingobacteriia	Sphingobacteriales	Sphingobacteriaceae	Sphingobacterium	sp.	97	nutrient agar (NA), diluted marine agar 2216 (MA, 5 sea water:1 marine agar), YM, and Sabouraud dextrose agar (SB) plates	25-APR-2006	GCTAATACCGCATACGACCTACGGGCGAAAGCAGGGGACCTTCGGGCCTTGCGCTATTAGATGAGCCTAGGTCGGATTAGCTAGTTGGTGGGGTAATGGCTCACCAAGGCGACGATCCGTAGCTGGTCTGAGAGGATGATCAGCCACACTGGAACTGAGACACGGCCCAGACTCCTACGGGAGGCAGCAGTGGGGAATATTGGACAATGGGCGAAAGCCTGATCCAGCCATGCCGCGTGTGTGAAGAAGGCCTTCGGGTTGTAAAGCACTTTTAGTA	FC27 RC1492
FL35		Meyer	Montastraea cavernosa mucus		healthy	NA	USA: Looe Key Reef, Florida Keys; 24.563056 N 81.400833 W	mucus	30° C		Bacteroidetes	Cytophagia	Cytophagales	Cytophagaceae	Euzebyella	saccharophila	0.99	CSA+pen		CAACGATGAAGAGTTTGATCCTGGCTCAGGATGAACGCTAGCGGCAGGCCTAACACATGCAAGTCGAGGGGCAGCGGGGAAAAGCTTGCTTTTCCGCCGGCGACCGGCGCACGGGTGCGCAACGCGTATACAATCTGCCCCCTACTGCGGGATAGCCCAGAGAAATTTGGATTAACACCGCATGGTACCGTATCCCCGCATGGGGTTTACGGTTAAAGGTCACGGTAGGGGATGAGTATGCGTCCCATTAGCTAGATGGCGGGGTAACGGCCCACCATGGCGACGATGGGTAGGGGCCCTGAGAGGGGGATCCCCCACACTGGTACTGAGACACGGACCAGACTCCTACGGGAGGCAGCAGTGAGGAATATTGGACAATGGGCGGGAGCCTGATCCAGC…	retrieved from whole genome assembly (unpublished)
6229-C3	HM173311	Kellogg	Paragorgia arborea								BActeroidetes	Flavobacteriia	Flavobacteriales	Flavobacteriaceae	Flavobacterium		99	GASWA	2011	GCAAGTCGAGGGGTATGGTTCTTCGGAACCAGAGACCGGCGCACGGGTGCGTAACGCGTATGCAATCTAC CTTTCACAGAGGGATAGCCCAGAGAAATTTGGATTAATACCTCATAGTATATTGGTCTCGCATGAGATTG TTATTAAAGATTTATCGGTGAAAGATGAGCATGCGTCCCATTAGTTAGTTGGTAAGGTAACGGCTTACCA AGACTACGATGGGTAGGGGTCCTGAGAGGGAGATCCCCCACACTGGTACTGAGACACGGACCAGACTCCT ACGGGAGGCAGCAGTGAGGAATATTGGACAATGGGCGCAAGCCTGATCCAGCCATGCCGCGTGCAGGATG ACGGTCCTATGGATTGTAAACTGCTTTTATACGAGAAGAAACAC…	Eco8F 1492R
HIMB1253	AM990672	Huggett and Rappe	Porites compressa		healthy	approximately 25 degrees celcius	Coconut Island, 19.7296° N, 155.0685° W	tissue	24 degrees celcius	Kaneohe Bay, Hawaii	Bacteroidetes	Bacteroidia	Flavobacteriales	Flavobacteriaceae	Tenacibaculum		99.63	MA2216	2010-08-01	TGCAGTCGAGGGGCAGCATCAATTGCTTGCAATTGGATGGCGACCGGCGAACGGGTGCGTAACGCGTATAGAATCTGCCTTGTACAGGAGGATAGCCTTTAGAAATGAAGATTAATACTCCATAGTTTAGGGATGTGGCATCGCATTCTTAATAAAGATTTATCGGTACAAGATGACTATGCGTCCTATTAGCTAGATGGTAAGGTAACGGCTTACCATGGCTACGATAGGTAGGGGGTCTGAGAGGACTATCCCCCACACTGGTACTGAGACACGGACCAGACTCCTACGGGAGGCAGCAGTGAGGAATATTGGTCAATGGAGGCAACTCTGAACCAGCCATGCCGCGTGCAGGAAGACTGCCCTATGGGTTGTAAACTGCTTTTATACAGGAAGAAA…	27F/1492R	Kaneohe Bay, Hawaii
HIMB1254	FJ917551	Huggett and Rappe	Porites compressa		healthy	approximately 25 degrees celcius	Coconut Island, 19.7296° N, 155.0685° W	tissue	24 degrees celcius	Kaneohe Bay, Hawaii	Bacteroidetes	Bacteroidia	Cytophagales	Flammeovirgaceae	Flammeovirga		99.6	10% R2A	2010-08-01	TCTGCTTGCAGAATGTCGACGACCGGCGCACGGGTGCGTAACGCGTATACAACTTACCTTTATCTGGAGGATAGCCCGGAGAAATTCGGATTAATACTCCATAGTATTATAAAGTAGCATTGCTTAATAATTAAAGATTTATCGGATAAAGATAGGTATGCGTCCCATTAGCTAGTTGGTGCAGGTAACGGCTCACCAAGGCGACGATGGGTAGGGGTTCTGAGAGGAAGGTCCCCCACACTGGCACTGAGATACGGGCCAGACTCCTACGGGAGGCAGCAGTAGGGAATATTGGTCAATGGAGGCAACTCTGAACCAGCCATGCCGCGTGAACGATGAAGGCCTTCGGGTTGTAAAGTTCTTTTGTATGGGAAGAAACTCACCCNTGCGNGGGTGCTT…	27F/1492R	Kaneohe Bay, Hawaii
HIMB1258	FJ202500	Huggett and Rappe	Porites compressa		healthy	approximately 25 degrees celcius	Coconut Island, 19.7296° N, 155.0685° W	tissue	24 degrees celcius	Kaneohe Bay, Hawaii	Bacteroidetes	Bacteroidia	Flavobacteriales	Flavobacteriaceae	Winogradskyella		99.65	R2A	2010-08-01	GTAACATTGGTTGCTTGCAACCAGATGACGAGTGGCGCACGGGTGCGTAACGCGTATACAATCTGCCTCTTACAGGGGGATAGCCTTTGGAAACGAAGAATAATACCCCATAGTATGTAGATGCCGCATGGTATTTGCATTAAAGATTTATCGGTAAGAGATGAGTATGCGTCCTATTAGCTAGATGGTGTGGTAACGGCACACCATGGCAACGATAGGTAGGGGCCCTGAGAGGGGGATCCCCCACACTGGTACTGAGACACGGACCAGACTCCTACGGGAGGCAGCAGTGAGGAATATTGGACAATGGGCGAGAGCCTGATCCAGCCATGCCGCGTGCAGGAAGACTGCCCTATGGGTTGTAAACTGCTTTTGTACGGGAAGAAACCCGCCTACGTG…	27F/1492R	Kaneohe Bay, Hawaii
HIMB1266	KX982669	Huggett and Rappe	Porites compressa		healthy	approximately 25 degrees celcius	Coconut Island, 19.7296° N, 155.0685° W	tissue	24 degrees celcius	Kaneohe Bay, Hawaii	Bacteroidetes	Bacteroidia	Flavobacteriales	Flavobacteriaceae	Tenacibaculum	agarivorans	99.77	10% R2A	2010-08-01	TGCAGTCGAGGGGTAACATTGTAGCTTGCTACAGATGACGACCGGCGAACGGGTGCGTAACGCGTATAGAATCTGCCTTGTACAGAGGGATAGCCTTTAGAAATGAAGATTAATACCTCATAGTACTGAGATGTGGCATCACGTTTTAGTTAAAGATTTATCGGTACAAGATGACTATGCGTCCTATTAGCTAGATGGTAAGGTAACGGCTTACCATGGCAACGATAGGTAGGGGGTCTGAGAGGATTATCCCCCACACTGGTACTGAGACACGGACCAGACTCCTACGGGAGGCAGCAGTGAGGAATATTGGTCAATGGAGGCAACTCTGAACCAGCCATGCCGCGTGCAGGAAGACTGCCCTATGGGTTGTAAACTGCTTTTATATGGGAAGAAACA…	27F/1492R	Kaneohe Bay, Hawaii
HIMB1267	FR744544	Huggett and Rappe	Porites compressa		healthy	approximately 25 degrees celcius	Coconut Island, 19.7296° N, 155.0685° W	tissue	24 degrees celcius	Kaneohe Bay, Hawaii	Bacteroidetes	Bacteroidia	Flavobacteriales	Flavobacteriaceae	Aquibacter		95.93	10% R2A	2010-08-01	TGCAGTCGAGGGGTAACAGGGATTGCTTGCAATCCGCTGACGACCGGCGCACGGGTGCGTAACGCGTATACAATCTGCCTCTTACTGGGGGATAGCCCAGAGAAATTTGGATTAACACCCCATGGTATGATGACTTGGCATCAAGATATCATTAAAGGTTACGGTAAGAGATGAGTATGCGTCCTATTAGCTAGTAGGTATGGTAACGGCATACCTAGGCGACGATAGGTAGGGGCCCTGAGAGGGGGATCCCCCACACTGGTACTGAGACACGGACCAGACTCCTACGGGAGGCAGCAGTGAGGAATATTGGGCAATGGAGGCAACTCTGACCCAGCCATGCCGCGTGCAGGAAGACTGCCCTATGGGTTGTAAACTGCTTTTATACGGGAAGAAACA…	27F/1492R	Kaneohe Bay, Hawaii
HIMB1274	HM572048	Huggett and Rappe	Pocilopora damicornis		healthy	approximately 25 degrees celcius	Coconut Island, 19.7296° N, 155.0685° W	tissue	24 degrees celcius	Kaneohe Bay, Hawaii	Bacteroidetes	Bacteroidia	Flavobacteriales	Flavobacteriaceae	Aurantivirga		97.03	R2A	2010-08-01	TGCAGTCGAGGGGTAACAGGGGTTGCTTGCAATCCGCTGACGACCGGCGCACGGGTGCGTAACGCGTATAGAACCTACCTTTTACTGAGGGATAGCCTTTAGAAATGAAGATTAATACCTCATAGTATTGAGAAATGGCATCATTTTTCAATTAAAGATTTATCGGTAAAAGATGGCTATGCGTTTTATTAGCTAGTAGGTAAGGTAACGGCTTACCTAGGCTACGATAAATAGGGGCCCTGAGAGGGGGATCCCCCACACTGGTACTGAGACACGGACCAGACTCCTACGGGAGGCAGCAGTGAGGAATATTGGTCAATGGAGGCAACTCTGAACCAGCCATGCCGCGTGCAGGAAGACGGCCCTATGGGTTGTAAACTGCTTTTATACAGGAAGAAA…	27F/1492R	Kaneohe Bay, Hawaii
HIMB1233	KX982669	Huggett and Rappe	Montipora capitata		healthy	approximately 25 degrees celcius	Coconut Island, 19.7296° N, 155.0685° W	tissue	24 degrees celcius	Kaneohe Bay, Hawaii	Bacteroidetes	Bacteroidia	Flavobacteriales	Flavobacteriaceae	Tenacibaculum		99.64	R2A	2010-08-01	TGCAGTCGAGGGGTAACATTGTAGCTTGCTACAGATGACGACCGGCGAACGGGTGCGTAACGCGTATAGAATCTGCCTTGTACAGAGGGATAGCCTTTAGAAATGAAGATTAATACCTCATAGTACTGAGATGTGGCATCACGTTTTAGTTAAAGATTTATCGGTACAAGATGACTATGCGTCCTATTAGCTAGATGGTAAGGTAACGGCTTACCATGGCAACGATAGGTAGGGGGTCTGAGAGGATTATCCCCCACACTGGTACTGAGACACGGACCAGACTCCTACGGGAGGCAGCAGTGAGGAATATTGGTCAATGGAGGCAACTCTGAACCAGCCATGCCGCGTGCAGGAAGACTGCCCTATGGGTTGTAAACTGCTTTTATATGGGAAGAAACA…	27F/1492R	Kaneohe Bay, Hawaii
HIMB1234	KX398615	Huggett and Rappe	Montipora capitata		healthy	approximately 25 degrees celcius	Coconut Island, 19.7296° N, 155.0685° W	tissue	24 degrees celcius	Kaneohe Bay, Hawaii	Bacteroidetes	Bacteroidia	Flavobacteriales	Flavobacteriaceae	Lacinutrix		99.64	R2A	2010-08-01	TGCAGTCGAGGGGTAACAGAGTAGCTTGCTATTGCTGACGACCGGCGCACGGGTGCGTAACGCGTATACAATCTGCCTTGTACTGAGGGATAGCCTTTGGAAACGAAGATTAATACCTCATAGTATTGCGACATCGCATGGTGATGCAATTAAAGGTTACGGTACAAGATGAGTATGCGTCCTATTAGCTAGATGGAGTGGTAACGGCACCCCATGGCAACGATAGGTAGGGGCCCTGAGAGGGGGATCCCCCACACTGGTACTGAGACACGGACCAGACTCCTACGGGAGGCAGCAGTGAGGAATATTGGACAATGGAGGCAACTCTGATCCAGCCATGCCGCGTGCAGGAAGACTGCCCTATGGGTTGTAAACTGCTTTTATACAGGAAGAAACAGA…	27F/1492R	Kaneohe Bay, Hawaii
HIMB1239	MF093152	Huggett and Rappe	Montipora capitata		healthy	approximately 25 degrees celcius	Coconut Island, 19.7296° N, 155.0685° W	tissue	24 degrees celcius	Kaneohe Bay, Hawaii	Bacteroidetes	Bacteroidia	Flavobacteriales	Flavobacteriaceae	Mesoflavibacter		99.51	MA2216	2010-08-01	TGCAGTCGAGGGGTAACAGAGAAAAGCTTGCTTTTTTGCTGACGACCGGCGAACGGGTGCGTAACGCGTATGCAATCTACCTTTTGCTAAGGGATAGCCCAGAGAAATTTGGATTAATACCTTATAGTATACTTACTTGGCATCGAGAAAGTATTAAAGATTACGGCAAAAGATGAGCATGCGTTCTATTAGCTAGTTGGTGTGGTAACGGCACACCAAGGCAACGATAGATAGGGGTCCTGAGAGGGAGATCCCCCACACTGGTACTGAGACACGGACCAGACTCCTACGGGAGGCAGCAGTGAGGAATATTGGACAATGGAGGCAACTCTGATCCAGCCATGCCGCGTGCAGGAAGACTGCCCTATGGGTTGTAAACTGCTTTTATACAGGAAGAAA…	27F/1492R	Kaneohe Bay, Hawaii
002newf	not accessioned yet	Medina	Symbiodiniaceae culture				Caribbean, Florida	algal culture	28	(LaJeunesse 2001)	Bacteroidetes	Flavobacteria	Flavobacteriales	Flavobacteriaceae	Muricauda	aquimarina	99	Marine agar		agagtttgatcctggctcaggatgaacgctagcggcaggcctaacacatgcaagtcgaggggcatcggggaaaagcttgcttttccgccggcgaccggcgcacgggtgcggaacgcgtatggaacctgcccctgtcaggggaatagcccagggaaacttggattaatgccccatggtaccgttatatcgcatgatattacggttaaagatttatcggacagggatggccatgcgtaccattagttagttggtggggtaacggctcaccaaggcagcgatggttaggggccctgagagggggatcccccacactggtactgagacacggaccagactcctacgggaggcagcagtgaggaatattggacaatgggcgggagcctgatccagccatgccgc…	Sequence pulled out of whole genome by RAST
002newc	not accessioned yet	Medina	Symbiodiniaceae culture				Caribbean, Florida	algal culture	28	(LaJeunesse 2001)	Bacteroidetes	Sphingobacteria	Sphingobacteriales	Flammeovigaceae	Fabibacter	pacificus	100	Marine agar		tattacaatggagagtttgatcctggctcaggatgaacgctagcggcaggcctaatacatgcaagtcgaacggtaggtttttcttcggagaaactgagagtggcgcacgggtgcgtaacgcgtatgcaacctacccttaacagggggatagcccagagaaatttggattaataccccatagtattacaagatggcatctgaaagtaattaaagatttatcggttaaggatgggcatgcgtgacattagatagttggtgaggtaacggctcaccaagtcaacgatgtctaggggttctgagaggatgatcccccacactggtactgagatacggaccagactcctacgggaggcagcagtagggaatattggtcaatgggcgagagcctgaaccagccat…	Sequence pulled out of whole genome by RAST
CV35	MH814620	Peixoto	Acropora millepora				Aquarium		26		Bacteroidetes	Flavobacteriia	Flavobacteriales	Flavobacteriaceae	Cellulophaga	lytica	99	Luria bertani	2018-03-27	CGAGGGGTAACAGAGGAGCTTGCTCTTGCTGACGACCGGCGCACGGGTGCGTAACGCGTATACAATCTGCCTTACACTAAGGGATAGCCCAGAGAAATTTGGATTAACACCTTATAGTTTATTTTTATGGCATCATTTAAATAATAAAGTTTACGGTGTAAGATGAGTATGCGTCCCATTAGTTTGTTGGTAAGGTAACGGCTTACCAAGACTACGATGGGTAGGGGCCCTGAGAGGGGGATCCCCCACACTGGTACTGAGACACGGACCAGACTCCTACGGGAGGCAGCAGTGAGGAATATTGGACAATGGAGGAGACTCTGATCCAGCCATGCCGCGTGCAGGAAGACGGTCCTATGGATTGTAAACTGCTTTTATACAGGAAGAATAAGGACTACG…	27f 1492r
1PC	MK167380	Peixoto	Água do mar								Bacteroidetes	Flavobacteriia	Flavobacteriales	Flavobacteriaceae	Cellulophaga	lytica	99	Marine agar	2015-10-10	CGCTCCTTGGCGGTGACGAACTTCAGGTACCCCCAGCTTCCATGGCTTGACGGGCGGTGTGTACAAGGCCCGGGAACGTATTCACCGGATCATGGCTGATATCCGATTACTAGCGATTCCAGCTTCACGGAGTCGAGTTGCAGACTCCGATCCGAACTGTGATAGGTTTTATAGATTCGCTCCTTATCGCTAAGTGGCTGCTCTCTGTACCTACCATTGTAGCACGTGTGTGGCCCAGGACGTAAGGGCCGTGATGATTTGACGTCATCCCCACCTTCCTCACGGTTTGCACCGGCAGTCTTGCTAGAGTCCCCACCATAATGTGCTGGTAACTAACAACAGGGGTTGCGCTCGTTATAGGACTTAACCTGACACCTCACGGCACGAGCTGACGACAAC…	27f 1492r
EL33	MF461393	Keller-Costa et al., 2017 FEMS Microbiol Ecol: 93 (12), fix143; Keller-Costa et al., 2016 MRA: 10.1128/genomeA.00855-16	Eunicella labiata (gorgonian)	18	healthy	14ºC	36.979778 N 7.989111 W; Pedra da Greta, Faro	tissue	18ºC		Bacteroidetes	Flavobacteriia	Flavobacteriales	Flavobacteriaceae	Aquimarina	sp.	99	Marine agar 1:2 diluted	2015-09-17	ACCTACCTTATAGTAAGGGATAGCCCAGAGAAATTTGGATTAATACCTTATAGTATCTTAAGTGAGCCTTCACTAAGGATTAAAGATTTATCGCTATAAGATGGCTATGCGTTCTATTAGCTAGTTGGTATGGTAACGGCATACCAAGGCTACGATAGATAGGGGTCCTGAGAGGGAGATCCCCCACACTGGTACTGAGACACGGACCAGACTCCTACGGGAGGCAGCAGTGAGGAATATTGGACAATGGAGGCAACTCTGATCCAGCCATGCCGCGTGTAGGAAGACTGCCCTATGGGTTGTAAACTACTTTTATAGAGGAAGAAACCATTCCACGTGTGGAATGCTGACGGTACTCTACGAATAAGGATCGGCTAACTCCGTGCCAGCAGCCGCGGT…	27f 1492r
EL43	MF461386	Keller-Costa et al., 2017 FEMS Microbiol Ecol: 93 (12), fix143	Eunicella labiata (gorgonian)	18	healthy	14ºC	36.979778 N 7.989111 W; Pedra da Greta, Faro	tissue	18ºC		Bacteroidetes	Flavobacteriia	Flavobacteriales	Flavobacteriaceae	Aquimarina	megaterium	100	Marine agar 1:2 diluted	2015-09-17	AGTCGAGGGGTAACATAGTTGCTTGCAACTGATGACGACCGGCGCACGGGTGCGTAACGCGTATAGTACCTACCTTATAGTAAGGGATAGCCCAGAGAAATTTGGATTAATACCTTATAGTATCCTAAGTGAGCCTTCACTAAGGATTAAAGATTTATCGCTATAAGATGGCTATGCGTTCTATTAGCTAGTTGGTATGGTAACGGCATACCAAGGCTACGATAGATAGGGGTCCTGAGAGGGAGATCCCCCACACTGGTACTGAGACACGGACCAGACTCCTACGGGAGGCAGCAGTGAGGAATATTGGACAATGGAGGCAACTCTGATCCAGCCATGCCGCGTGTAGGAAGACTGCCCTATGGGTTGTAAACTACTTTTATAGAGGAAGAAACCATT…	27f 1492r
Voolstra_H30	FJ360684.1.1470	no	Acropora hemprochii		Healthy	25ºC	22°15.100’N, 38°57.386’E	Tissue	25ºC		Bacteroidetes	Flavobacteriia	Flavobacteriales	Flavobacteriaceae	Meridianimaribacter	Meridianimaribacter flavus	99.206	DMSP enriched minimal media	Nov/19/2017	AGGCACTCCCAGCTTCCATGGCTTGACGGGCGGTGTGTACAAGGCCCGGGAACGTATTCACCGGATCATGGCTGATATCCGATTACTAGCGATTCCAGCTTCACGGAGTCGAGTTGCAGACTCCGATCCGAACTGTGATAGGTTTTTAGGATTCGCTCCTGCTCACGCAGTGGCTGCCCTCTGTACCTACCATTGTAGCACGTGTGTAGCCCAGGACGTAAGGGCCGTGATGATTTGACGTCATCCCCACCTTCCTCACGGTTTGCACCGGCAGTCTTGCTAGAGTTCCCGACATTACTCGCTGGCAACTAACAACAGGGGTTGCGCTCGTTATAGGACTTAACCTGACACCTCACGGCACGAGCTGACGACAACCATGCAGCACCTTGTAAGTAGTCC…	1492R
Voolstra_C37	FJ652058.1.1271	no	Acropora humilis		Healthy	25ºC	22°15.100’N, 38°57.386’E	Tissue	25ºC		Bacteroidetes	Cytophagia	Cytophagales	Flammeovirgaceae	Roseivirga	Roseivirga sp. enrichment culture clone NE	99.891	DMSP enriched minimal media	Nov/19/2017	GGTCCACCCAACTCCCATGGCTTGACGGGCGGTGTGTACAAGGTCCGGGAACGTATTCACCGCGCCATTGCTGATGCGCGATTACTAGCGATTCCACCTTCACGTGGTCGAGTTGCAGACCACGATCCGAACTGAGAAAGACTTTTTGAGATTGGCATCACGTTACCGTGTAGCTACCCTTTGTATCTCCCATTGTAGCACGTGTGTAGCCCTGGGCGTAAGGGCCATGATGACTTGACGTCGTCCCCTCCTTCCTCTCTGCTTGCGCAGGCAGTCCTGTTAGAGTCCCCATCATAACATGCTGGCAACTAACAGTAGGGGTTGCGCTCGTTGCGGGACTTAACCCAACACCTCACGGCACGAGCTGACGACAGCCATGCAGCACCTTGCTTCGTGTCC…	1492R
Voolstra_C42	CP003156.1917540.1918950	no	Acropora humilis		Healthy	25ºC	22°15.100’N, 38°57.386’E	Tissue	25ºC		Bacteroidetes	Flavobacteriia	Flavobacteriales	Cryomorphaceae	Owenweeksia	Owenweeksia hongkongensis DSM 17368	96.326	DMSP enriched minimal media	Nov/19/2017	CAGGCACCCCCAGCTTCCATGGCTTGACGGGCGGTGTGTACAAGGCCCGGGAACGTATTCACCGCGCCATGGCTGATGCGCGATTACTAGCGATTCCAGCTTCATGGAGTCGAGTTGCAGACTCCAATCCGAACTGAGATAGTGTTTAGAGATTAGCATCACATCGCTGTGTAGCTGCCCTTTGTCACTACCATTGTAGCACGTGTGTGGCCCTGGACGTAAGGGCCGTGATGATTTGACGTCATCCCCACCTTCCTCACCGCTTGCGCGGGCAGTTTTCCTAGAGTCCCCGGCCGAACCGCTGGCAACTAAGAATAGGGGTTGCGCTCGTTATGGGACTTAACCCGACACCTCACGGCACGAGCTGACGACAACCATGCAGCACCTTGTAAATTGTCC…	1492R
ApWi04		Sharp	Astrangia poculata								Bacteroidetes	Flavobacteriia	Flavobacteriales	Flavobacteriaceae	Flavobacterium	piscis	98.8	DIFCO 2216	2018-12-01	CGGCGCACGGGTGCGTAACGCGTATGCAATCTACCTTTCACAGAGGGATAGCCCAGAGAAATTTGGATTAATACCTCATAGTATATCGAGTTGGCATCAACATGATATTAAAGATTTATCGGTGAAAGATGAGCATGCGTCCCATTAGCTAGTTGGTATGGTAACGGCATACCAAGGCTACGATGGGTAGGGGTCCTGAGAGGGAGATCCCCCACACTGGTACTGAGACACGGACCAGACTCCTACGGGAGGCAGCAGTGAGGAATATTGGACAATGGGCGCAAGCCTGATCCAGCCATGCCGCGTGCAGGATGACGGTCCTATGGATTGTAAACTGCTTTTATACGAGAAGAAACACTCCTTCGTGAAGGAGCTTGACGGTATCGTAAGAATAAGGAT…	27F 1492R
ApWi20		Sharp	Astrangia poculata								Bacteroidetes	Flavobacteriia	Flavobacteriales	Flavobacteriaceae	Flavobacterium	piscis	98.8	DIFCO 2216	2018-12-01	GGTGCGTAACGCGTATGCAATCTACCTTTCACAGAGGGATAGCCCAGAGAAATTTGGATTAATACCTCATAGTATATCGAGTTGGCATCAACATGATATTAAAGATTTATCGGTGAAAGATGAGCATGCGTCCCATTAGCTAGTTGGTATGGTAACGGCATACCAAGGCTACGATGGGTAGGGGTCCTGAGAGGGAGATCCCCCACACTGGTACTGAGACACGGACCAGACTCCTACGGGAGGCAGCAGTGAGGAATATTGGACAATGGGCGCAAGCCTGATCCAGCCATGCCGCGTGCAGGATGACGGTCCTATGGATTGTAAACTGCTTTTATACGAGAAGAAACACTCCTTCGTGAAGGAGCTTGACGGTATCGTAAGAATAAGGATCGGCTAACT…	27F 1492R
ApWi38		Sharp	Astrangia poculata								Bacteroidetes	Flavobacteriia	Flavobacteriales	Flavobacteriaceae	Flavobacterium	piscis	98.8	DIFCO 2216	2018-12-01	TTGGATTAATACCTCATAGTATATCGAGTTGGCATCAACATGATATTAAAGATTTATCGGTGAAAGATGAGCATGCGTCCCATTAGCTAGTTGGTATGGTAACGGCATACCAAGGCTACGATGGGTAGGGGTCCTGAGAGGGAGATCCCCCACACTGGTACTGAGACACGGACCAGACTCCTACGGGAGGCAGCAGTGAGGAATATTGGACAATGGGCGCAAGCCTGATCCAGCCATGCCGCGTGCAGGATGACGGTCCTATGGATTGTAAACTGCTTTTATACGAGAAGAAACACTCCTTCGTGAAGGAGCTTGACGGTATCGTAAGAATAAGGATCGGCTAACTCCGTGCCAGCAGCCGCGGTAATACGGAGGATCCAAGCGTTATCCGGAATCATT…	27F 1492R
ApWi44		Sharp	Astrangia poculata								Bacteroidetes	Flavobacteriia	Flavobacteriales	Flavobacteriaceae	Salinimicrobium	marinum	99.6	DIFCO 2216	2018-12-01	TGGCGAACGGGTGAGTAACACGTGAGCAACCTGCCCCTGACTCTGGGATAAGCGCTGGAAACGGCGTCTAATACTGGATACGAGACGTGATCGCATGGTCAACGTTTGGAAAGATTTTTCGGTTGGGGATGGGCTCGCGGCCTATCAGCTTGTTGGTGAGGTAATGGCTCACCAAGGCGTCGACGGGTAGCCGGCCTGAGAGGGTGACCGGCCACACTGGGACTGAGACACGGCCCAGACTCCTACGGGAGGCAGCAGTGGGGAATATTGCACAATGGGCGCAAGCCTGATGCAGCAACGCCGCGTGAGGGATGACGGCCTTCGGGTTGTAAACCTCTTTTAGCAGGGAAGAAGCGAGAGTGACGGTACCTGCAGAAAAAGCACCGGCTAACTACGTGC…	27F 1492R
ApWi50		Sharp	Astrangia poculata								Bacteroidetes	Flavobacteriia	Flavobacteriales	Flavobacteriaceae	Flavobacterium	piscis	98.8	DIFCO 2216	2018-12-01	GACCGGCGCACGGGTGCGCAACGCGTATGCAATCTACCTCTTACTAAGGGATAGCCCAGAGAAATTTGGATTAATATCTTATGTGATATTAGACTGGCATCGGTTTAATATTAAAGGTT-A-CGGTAAGAGATGAGCATGCGTCTCATTAGTTAGTTGGTAAGGTAACGGCTTACCAAGACTTCGATGAGTAGGGGTCCTGAGAGGGAGATCCCCCACACTGGTACTGAGACACGGACCAGACTCCTACGGGAGGCAGCAGTGAGGAATATTGGACAATGGACGGAAGTCTGATCCAGCCATGCCGCGTGTAGGAAGACTGCCCTATGGGTTGTAAACTACTTTTATACAGGAAGAATAAGATCTACGTGTAGATTGATGACGGTACTGTAAGAATAAG…	27F 1492R
ApWi56		Sharp	Astrangia poculata								Bacteroidetes	Flavobacteriia	Flavobacteriales	Flavobacteriaceae	Flavobacterium	piscis	98.8	DIFCO 2216	2018-12-01	CGGCGCACGGGTGCGTAACGCGTATGCAATCTACCTTTCACAGAGGGATAGCCCAGAGAAATTTGGATTAATACCTCATAGTATATCGAGTTGGCATCAACATGATATTAAAGATTTATCGGTGAAAGATGAGCATGCGTCCCATTAGCTAGTTGGTATGGTAACGGCATACCAAGGCTACGATGGGTAGGGGTCCTGAGAGGGAGATCCCCCACACTGGTACTGAGACACGGACCAGACTCCTACGGGAGGCAGCAGTGAGGAATATTGGACAATGGGCGCAAGCCTGATCCAGCCATGCCGCGTGCAGGATGACGGTCCTATGGATTGTAAACTGCTTTTATACGAGAAGAAACACTCCTTCGTGAAGGAGCTTGACGGTATCGTAAGAATAAGGAT…	27F 1492R
ApWi71		Sharp	Astrangia poculata								Bacteroidetes	Flavobacteriia	Flavobacteriales	Flavobacteriaceae	Salinimicrobium	marinum	99.6	DIFCO 2216	2018-12-01	GCGTTGGAAACGACGTCTAATACCGGATATGACCTGTGACGGCATCGTCTGCAGGTGGAAAGAATTTTGGTCAAGGATGGACTCGCGGCCTATCAGGTAGTTGGTGAGGTAATGGCTCACCAAGCCGACGACGGGTAGCCGGCCTGAGAGGGTGACCGGCCACACTGGGACTGAGACACGGCCCAGACTCCTACGGGAGGCAGCAGTGGGGAATATTGCACAATGGGCGAAAGCCTGATGCAGCAACGCCGCGTGAGGGATGACGGCCTTCGGGTTGTAAACCTCTTTTAGTTGGGAAGAAGGGAGCTTGCTCTTGACGGTACCAGCAGAAAAAGCACCGGCTAACTACGTGCCAGCAGCCGCGGTAATACGTAGGGTGCAAGCGTTGTCCGGAATTAT…	27F 1492R
ApWi85		Sharp	Astrangia poculata								Bacteroidetes	Flavobacteriia	Flavobacteriales	Flavobacteriaceae	Salinimicrobium	marinum	99.6	DIFCO 2216	2018-12-01	GATAAGCCTGGGAAACCGGGTCTAATACCGGATATGAATCCTGCCGCATGGTGGGGGTTGGAAAGTTTTTCGGGGCAGGATGAGCCCGCGGCCTATCAGCTTGTTGGTGGGGTAATGGCCTACCAAGGCGACGACGGGTAGCCGGCCTGAGAGGGTGATCGGCCACACTGGGACTGAGACACGGCCCAGACTCCTACGGGAGGCAGCAGTGGGGAATATTGCACAATGGGCGAAAGCCTGATGCAGCGACGCCGCGTGGGGGATGACGGTCTTCGGATTGTAAACCCCTTTCAGTAGGGACGAAGCGCAAGTGACGGTACCTGCAGAAGAAGCACCGGCTAACTACGTGCCA	27F 1492R
ApWi96		Sharp	Astrangia poculata								Bacteroidetes	Flavobacteriia	Flavobacteriales	Flavobacteriaceae	Salinimicrobium	marinum	99.6	DIFCO 2216	2018-12-01	GGTGAGGTAATGGCTCACCAAGGCGTCGACGGGTAGCCGGCCTGAGAGGGTGACCGGCCACACTGGGACTGAGACACGGCCCAGACTCCTACGGGAGGCAGCAGTGGGGAATATTGCACAATGGGCGCAAGCCTGATGCAGCAACGCCGCGTGAGGGATGACGGCCTTCGGGTTGTAAACCTCTTTTAGCAGGGAAGAAGCGAGAGTGACGGTACCTGCAGAAAAAGCACCGGCTAACTACGTGCCAGCAGCCGCGGTAATACGTAGGGTGCAAGCGTTATCCGGAATTATTGGGCGTAAAGAGCTCGTAGGCGGTTTGTCGCGTCTGCTGTGAAATCTGGGGGCTCAACCCCCAGCCTGCAGTGGGTACGGGCAGACTAGAGTGCGGTAGGGGAGATT…	27F 1492R
ApSp08		Sharp	Astrangia poculata								Bacteroidetes	Flavobacteriia	Flavobacteriales	Flavobacteriaceae	Maribacter	aquivivus	99.4	DIFCO 2216	2018-12-01	GCACGGGTGCGCACCGCGTATGGAACCTACCTTGTACAGGGGAATAGCCTTTGGAAACGAAGATTAATGCCCCGTGGTACCACGCCCCGGCATCGGGATGTGGTTAAAGCCTTCGGGCGGTACAAGATGGCCATGCGTCCCATTAGCTTGTTGGTAAGGTAACGGCTTACCAAGGCTACGATGGGTAGGGGCCCTGAGAGGGGGGTCCCCCACACTGGTACTGAGACACGGACCAGACTCCTACGGGAGGCAGCAGTGAGGAATATTGGACAATGGAGGAGACTCTGATCCAGCCATGCCGCGTGCAGGAAGAATGCCCTATGGGTAGTAAACTGCTTTTATACAGGAAGAAAAAGAGCTACGTGTAGCTTACTGACGGTACTGTAAGAATAAGGACCG…	27F 1492R
ApSp11		Sharp	Astrangia poculata								Bacteroidetes	Flavobacteriia	Flavobacteriales	Flavobacteriaceae	Cellulophaga	baltica	99.8	DIFCO 2216	2018-12-01	GCTTGCTCCGCTGACGACCGGCGCACGGGTGCGCAACGCGTATGCAATCTACCTCTTACTAAGGGATAGCCCAGAGAAATTTGGATTAATATCTTATGTGATATTAGACTGGCATCGGTTTAATATTAAAGGTTACGGTAAGAGATGAGCATGCGTCTCATTAGTTAGTTGGTAAGGTAACGGCTTACCAAGACTTCGATGAGTAGGGGTCCTGAGAGGGAGATCCCCCACACTGGTACTGAGACACGGACCAGACTCCTACGGGAGGCAGCAGTGAGGAATATTGGACAATGGACGGAAGTCTGATCCAGCCATGCCGCGTGTAGGAAGACTGCCCTATGGGTTGTAAACTACTTTTATACAGGAAGAATAAGATCTACGTGTAGATTGATGACGGTA…	27F 1492R
ApSp12		Sharp	Astrangia poculata								Bacteroidetes	Flavobacteriia	Flavobacteriales	Flavobacteriaceae	Flavobacterium	micromati	97.5	DIFCO 2216	2018-12-01	GGGTGCGTAACGCGTATGCAATCTACCTTTCACAGAGGGATAGCCCAGAGAAATTTGGATTAATACCTCATAGTATATCGAGTTGGCATCAACATGATATTAAAGATTTATCGGTGAAAGATGAGCATGCGTCCCATTAGCTAGTTGGTATGGTAACGGCATACCAAGGCTACGATGGGTAGGGGTCCTGAGAGGGAGATCCCCCACACTGGTACTGAGACACGGACCAGACTCCTACGGGAGGCAGCAGTGAGGAATATTGGACAATGGGCGCAAGCCTGATCCAGCCATGCCGCGTGCAGGATGACGGTCCTATGGATTGTAAACTGCTTTTATACGAGAAGAAACACTCCTTCGTGAAGGAGCTTGACGGTATCGTAAGAATAAGGATCGGCTAAC…	27F 1492R
ApSp17		Sharp	Astrangia poculata								Bacteroidetes	Flavobacteriia	Flavobacteriales	Flavobacteriaceae	Flavobacterium	micromati	97.5	DIFCO 2216	2018-12-01	GGTGCGTAACGCGTATGCAATCTACCTTTCACAAAGGGATAGCCCAGAGAAATTTGGATTAATACCTTATAGTAATACGCCTTGGCATCAAGATGTATTTAAAGATTTATCGGTGAAAGATGAGCATGCGTCCCATTAGCTAGTTGGTATGGTAACGGCATACCAAGGCTACGATGGGTAGGGGTCCTGAGAGGGAGATCCCCCACACTGGTACTGAGACACGGACCAGACTCCTACGGGAGGCAGCAGTGAGGAATATTGGACAATGGGCGCAAGCCTGATCCAGCCATGCCGCGTGCAGGATGACGGTCCTATGGATTGTAAACTGCTTTTATACAGGAAGAAACACCTCTACGTGTAGAGACTTGACGGTACTGTAAGAATAAGGATCGGCTAACT…	27F 1492R
ApSp19		Sharp	Astrangia poculata								Bacteroidetes	Flavobacteriia	Flavobacteriales	Flavobacteriaceae	Flavobacterium	micromati	97.5	DIFCO 2216	2018-12-01	GCGTAACGCGTATGCAATCTACCTTTCACAGAGGGATAGCCCAGAGAAATTTGGATTAATACCTCATAGTATATCGAGTTGGCATCAACATGATATTAAAGATTTATCGGTGAAAGATGAGCATGCGTCCCATTAGCTAGTTGGTATGGTAACGGCATACCAAGGCTACGATGGGTAGGGGTCCTGAGAGGGAGATCCCCCACACTGGTACTGAGACACGGACCAGACTCCTACGGGAGGCAGCAGTGAGGAATATTGGACAATGGGCGCAAGCCTGATCCAGCCATGCCGCGTGCAGGATGACGGTCCTATGGATTGTAAACTGCTTTTATACGAGAAGAAACACTCCTTCGTGAAGGAGCTTGACGGTATCGTAAGAATAAGGATCGGCTAACTCCG…	27F 1492R
ApSp23		Sharp	Astrangia poculata								Bacteroidetes	Flavobacteriia	Flavobacteriales	Flavobacteriaceae	Flavobacterium	fluminis	99.8	DIFCO 2216	2018-12-01	TAAAGTCACAACGGTGAAAGATGAGCATGCGTCCCATTAGCTAGTTGGTAAGGTAACGGCTTACCAAGGCAACGATGGGTAGGGGTCCTGAGAGGGAGATCCCCCACACTGGTACTGAGACACGGACCAGACTCCTACGGGAGGCAGCAGTGAGGAATATTGGTCAATGGGCGCAAGCCTGAACCAGCCATGCCGCGTGCAGGATGACGGTCCTATGGATTGTAAACTGCTTTTGTACGAGAAGAAACAACATTACGTGTAATGTCTTGACGGTATCGTAAGAATAAGGATCGGCTAACTCCGTGCCAGCAGCCGCGGTAATACGGAGGATCCAAGCGTTATCCGGAATCATTGGGTTTAAAGGGTCCGTAGGCGGTTTAGTAAGTCAGTGGTGAAAGC…	27F 1492R
ApSp27		Sharp	Astrangia poculata								Bacteroidetes	Cytophagia	Cytophagales	Flammeovirgceae	Roseivirga	seohaensis	98.6	DIFCO 2216	2018-12-01	AGAGAGTGGCGAACGGGTGCGTAACGCGTATGCAACCTACCTTGTACAGGGGAATAGCCCGGAGAAATTCGGATTAATGCCCCATAGTATCACCAGATGGCATCTGAAGGTGATTAAAGATTTATCGGTACAAGATGGGCATGCGTGACATTAGTTAGTTGGCGGGGTAACGGCCCACCAAGACTATGATGTCTAGGGGTTCTGAGAGGATGATCCCCCACACTGGTACTGAGATACGGACCAGACTCCTACGGGAGGCAGCAGTAGGGAATATTGGTCAATGGGCGAGAGCCTGAACCAGCCATGCCGCGTGCAGGATGACGGCCTTCTGGGTTGTAAACTGCTTTTATACGGGAAGAAAAAACCTTTGCGAAGGGAATTGCCGGTACCGTATGAATA…	27F 1492R
ApSp35		Sharp	Astrangia poculata								Bacteroidetes	Flavobacteriia	Flavobacteriales	Flavobacteriaceae	Zobellia	laminariae	100	DIFCO 2216	2018-12-01	GTTGACGACCGGCGCACGGGTGCGCAACGCGTATACAATCTACCCCCTACTGTGGGATAGCCCAGAGAAATTTGGATTAAGACCACATGGTACCATTTTACGGCATCGTATTAATGGTTAAAGGTTACGGTAGGGGATGAGTATGCGTCCCATTAGTTAGTTGGCGAGGTAACGGCTCACCAAGACCGCGATGGGTAGGGGCCCTGAGAGGGGGATCCCCCACACTGGTACTGAGACACGGACCAGACTCCTACGGGAGGCAGCAGTGAGGAATATTGGACAATGGGCGGGAGCCTGATCCAGCCATGCCGCGTGCAGGAAGAATGCCCTATGGGTAGTAAACTGCTTTTATACGGGAAGAAAAAGAGCTACGTGTAGCTTACTGACGGTACCGTAAGA…	27F 1492R
ApSp38		Sharp	Astrangia poculata								Bacteroidetes	Flavobacteriia	Flavobacteriales	Flavobacteriaceae	Maribacter	aquivivus	99.4	DIFCO 2216	2018-12-01	GCTTGCTCCGCTGACGACCGGCGCACGGGTGCGCACCGCGTATGGAACCTACCTTGTACAGGGGAATAGCCTTTGGAAACGAAGATTAATGCCCCGTGGTACCACGCCCCGGCATCGGGATGTGGTTAAAGCCTTCGGGCGGTACAAGATGGCCATGCGTCCCATTAGCTTGTTGGTAAGGTAACGGCTTACCAAGGCTACGATGGGTAGGGGCCCTGAGAGGGGGGTCCCCCACACTGGTACTGAGACACGGACCAGACTCCTACGGGAGGCAGCAGTGAGGAATATTGGACAATGGAGGAGACTCTGATCCAGCCATGCCGCGTGCAGGAAGAATGCCCTATGGGTAGTAAACTGCTTTTATACAGGAAGAAAAAGAGCTACGTGTAGCTTACTGAC…	27F 1492R
ApSp45		Sharp	Astrangia poculata								Bacteroidetes	Flavobacteriia	Flavobacteriales	Flavobacteriaceae	Salinimicrobium	marinum	97.8	DIFCO 2216	2018-12-01	GGCGCACGGGTGCGTAACGCGTATACAATCTACCTTGTAGAGGGGGATAGCCCGGGGAAACCCGGATTAATACCCCATAGTACTTAGAGACAGCATTGTTTTTAGGTTAAACATTTATGGCTACAAGATGAGTATGCGTCCTATTAGTTAGTTGGTAAGGTAACGGCTTACCAAGACTTCGATAGGTAGGGGTCCTGAGAGGGAGATCCCCCACACTGGTACTGAGACACGGACCAGACTCCTACGGGAGGCAGCAGTGAGGAATATTGGACAATGGGCGAGAGCCTGATCCAGCCATGCCGCGTGCAGGAAGACGGCCCTATGGGTTGTAAACTGCTTTTATACGGGAAGAAACACTCCTTCGTGAAGGAGCTTGACGGTACCGTAAGAATAAGGATC…	27F 1492R
ApSp47		Sharp	Astrangia poculata								Bacteroidetes	Flavobacteriia	Flavobacteriales	Flavobacteriaceae	Flavobacterium	fluminis	99.8	DIFCO 2216	2018-12-01	AAAGTCACAACGGTGAAAGATGAGCATGCGTCCCATTAGCTAGTTGGTAAGGTAACGGCTTACCAAGGCAACGATGGGTAGGGGTCCTGAGAGGGAGATCCCCCACACTGGTACTGAGACACGGACCAGACTCCTACGGGAGGCAGCAGTGAGGAATATTGGTCAATGGGCGCAAGCCTGAACCAGCCATGCCGCGTGCAGGATGACGGTCCTATGGATTGTAAACTGCTTTTGTACGAGAAGAAACAACATTACGTGTAATGTCTTGACGGTATCGTAAGAATAAGGATCGGCTAACTCCGTGCCAGCAGCCGCGGTAATACGGAGGATCCAAGCGTTATCCGGAATCATTGGGTTTAAAGGGTCCGTAGGCGGTTTAGTAAGTCAGTGGTGAAAGCC…	27F 1492R
ApSp51		Sharp	Astrangia poculata								Bacteroidetes	Flavobacteriia	Flavobacteriales	Flavobacteriaceae	Maribacter	aquivivus	99.4	DIFCO 2216	2018-12-01	GGTGCGCACCGCGTATGGAACCTACCTTGTACAGGGGAATAGCCCAGGGAAACTTGGATTAATGCCCCGTGGTACCATGACCCGGCATCGGGATATGGTTAAAGCCTTCGGGCGGTACAAGATGGCCATGCGTCCCATTAGTTTGTTGGTAAGGTAACGGCTTACCAAGACTACGATGGGTAGGGGCCCTGAGAGGGGGATCCCCCACACTGGTACTGAGACACGGACCAGACTCCTACGGGAGGCAGCAGTGAGGAATATTGGACAATGGAGGAGACTCTGATCCAGCCATGCCGCGTGCAGGAAGAATGCCCTATGGGTAGTAAACTGCTTTTATACGGGAAGAAAAAGAGCTACGTGTAGCTTACTGACGGTACCGTAAGAATAAGGACCGGCTAA…	27F 1492R
ApSp54		Sharp	Astrangia poculata								Bacteroidetes	Cytophagia	Cytophagales	Flammeovirgceae	Roseivirga	seohaensis	98.6	DIFCO 2216	2018-12-01	TGGCGCACGGGTGCGTAACGCGTAACCAACCTGCCCTTGACTGGGGGATAGCCCGCCGAAAGGCGGATTAATACCGCATAAACCAACAGCGCGGCATCGCGCAATTGGTAAAGATTTATTGGTCAAGGATGGGGTTGCGTGACATTAGCTAGTTGGCGGGGTAACGGCCCACCAAGGCGACGATGTCTAGGGGACCTGAGAGGGTGATCCCCCACACTGGCACTGAGATACGGGCCAGACTCCTACGGGAGGCAGCAGTAGGGAATATTGGGCAATGGACGAGAGTCTGACCCAGCCATGCCGCGTGCAGGATGAAGGCCTTCTGGGTTGTAAACTGCTTTTCTCAGGGAAGAAAAAGGGGATGCGTCCTCAACTGACGGTACCTGAGGAATAAGCACC…	27F 1492R
ApSp55		Sharp	Astrangia poculata								Bacteroidetes	Flavobacteriia	Flavobacteriales	Flavobacteriaceae	Cellulophaga	baltica	99.8	DIFCO 2216	2018-12-01	CCGCTGACGACCGGCGCACGGGTGCGCAACGCGTATGCAATCTACCTCTTACTAAGGGATAGCCCAGAGAAATTTGGATTAATATCTTATGTGATATTAGACTGGCATCGGTTTAATATTAAAGGTTACGGTAAGAGATGAGCATGCGTCTCATTAGTTAGTTGGTAAGGTAACGGCTTACCAAGACTTCGATGAGTAGGGGTCCTGAGAGGGAGATCCCCCACACTGGTACTGAGACACGGACCAGACTCCTACGGGAGGCAGCAGTGAGGAATATTGGACAATGGACGGAAGTCTGATCCAGCCATGCCGCGTGTAGGAAGACTGCCCTATGGGTTGTAAACTACTTTTATACAGGAAGAATAAGATCTACGTGTAGATTGATGACGGTACTGTAAG…	27F 1492R
ApSp66		Sharp	Astrangia poculata								Bacteroidetes	Cytophagia	Cytophagales	Flammeovirgceae	Roseivirga	seohaensis	98.6	DIFCO 2216	2018-12-01	GAACGGGTGCGTAACGCGTATGCAACCTACCTTGTACAGGGGAATAGCCCGGAGAAATTCGGATTAATGCCCCATAGTATCACCAGATGGCATCTGAAGGTGATTAAAGATTTATCGGTACAAGATGGGCATGCGTGACATTAGTTAGTTGGCGGGGTAACGGCCCACCAAGACTATGATGTCTAGGGGTTCTGAGAGGATGATCCCCCACACTGGTACTGAGATACGGACCAGACTCCTACGGGAGGCAGCAGTAGGGAATATTGGTCAATGGGCGAGAGCCTGAACCAGCCATGCCGCGTGCAGGATGACGGCCTTCTGGGTTGTAAACTGCTTTTATACGGGAAGAAAAAACCTTTGCGAAGGGAATTGCCGGTACCGTATGAATAAGCACCGGCT…	27F 1492R
ApSp67		Sharp	Astrangia poculata								Bacteroidetes	Flavobacteriia	Flavobacteriales	Flavobacteriaceae	Maribacter	aquivivus	99.4	DIFCO 2216	2018-12-01	GGTGCGCACCGCGTATGGAACCTACCTTGTACAGGGGAATAGCCCAGGGAAACTTGGATTAATGCCCCGTAGTACCACGCTCTGGCATCAGGATGTGGTTAAAGCCTTCGGGCGGTACAAGATGGCCATGCGTCCCATTAGTTTGTTGGTAAGGTAACGGCTTACCAAGACTACGATGGGTAGGGGCCCTGAGAGGGGGATCCCCCACACTGGTACTGAGACACGGACCAGACTCCTACGGGAGGCAGCAGTGAGGAATATTGGACAATGGAGGAGACTCTGATCCAGCCATGCCGCGTGCAGGAAGAATGCCCTATGGGTAGTAAACTGCTTTTATACAGGAAGAAAAAGAGCTACGTGTAGCTTACTGACGGTACTGTAAGAATAAGGACCGGCTAA…	27F 1492R
ApSp68		Sharp	Astrangia poculata								Bacteroidetes	Flavobacteriia	Flavobacteriales	Flavobacteriaceae	Cellulophaga	fucicola	97.4	DIFCO 2216	2018-12-01	ATGAGAGCGGCGCACGGGTGCGTAACGCGTATACAATCTACCTTTTGCTACGGGATAGCCCAGAGAAATTTGGATTAACACCGCATAGTATATGAGAATCGCATGGTTTTCATATTAAAGGTTACGGCAGAAGATGAGTATGCGTCCTATTAGCTTGTTGGTAAGGTAACGGCTTACCAAGGCAACGATAGGTAGGGGCCCTGAGAGGGGGATCCCCCACACTGGTACTGAGACACGGACCAGACTCCTACGGGAGGCAGCAGTGAGGAATATTGGACAATGGAGGCAACTCTGATCCAGCCATGCCGCGTGCAGGAAGACTGCCCTATGGGTTGTAAACTGCTTTTATACAGGAAGAAACAATCTCACGTGTGAGATCTTGACGGTACTGTAAGAATA…	27F 1492R
ApSp70		Sharp	Astrangia poculata								Bacteroidetes	Flavobacteriia	Flavobacteriales	Flavobacteriaceae	Flavobacterium	micromati	97.5	DIFCO 2216	2018-12-01	GGGTGCGTAACGCGTATGCAATCTACCTTTCACAGAGGGATAGCCCAGAGAAATTTGGATTAATACCTCATAGTATATCGAGTTGGCATCAACATGATATTAAAGATTTATCGGTGAAAGATGAGCATGCGTCCCATTAGCTAGTTGGTATGGTAACGGCATACCAAGGCTACGATGGGTAGGGGTCCTGAGAGGGAGATCCCCCACACTGGTACTGAGACACGGACCAGACTCCTACGGGAGGCAGCAGTGAGGAATATTGGACAATGGGCGCAAGCCTGATCCAGCCATGCCGCGTGCAGGATGACGGTCCTATGGATTGTAAACTGCTTTTATACGAGAAGAAACACTCCTTCGTGAAGGAGCTTGACGGTATCGTAAGAATAAGGATCGGCTAAC…	27F 1492R
ApSp71		Sharp	Astrangia poculata								Bacteroidetes	Flavobacteriia	Flavobacteriales	Flavobacteriaceae	Zobellia	laminariae	100	DIFCO 2216	2018-12-01	GTCTAGCTTGCTAGATGTTGACGACCGGCGCACGGGTGCGCAACGCGTATACAATCTACCCCCTACTGTGGGATAGCCCAGAGAAATTTGGATTAAGACCACATAGTACTATATTACGGCATCGTATTTATAGTTAAAGGTTACGGTAGGGGATGAGTATGCGTCCCATTAGTTAGTTGGCGAGGTAACGGCTCACCAAGACCGCGATGGGTAGGGGCCCTGAGAGGGGGATCCCCCACACTGGTACTGAGACACGGACCAGACTCCTACGGGAGGCAGCAGTGAGGAATATTGGACAATGGACGAGAGTCTGATCCAGCCATGCCGCGTGCAGGAAGAATGCCCTATGGGTAGTAAACTGCTTTTATACGGGAAGAAAAAGAGCTACGTGTAGCTTAC…	27F 1492R
ApSp77		Sharp	Astrangia poculata								Bacteroidetes	Cytophagia	Cytophagales	Flammeovirgceae	Roseivirga	seohaensis	98.6	DIFCO 2216	2018-12-01	AAATTCGGATTAATGCCCCATAGTATCACCAGATGGCATCTGAAGGTGATTAAAGATTTATCGGTACAAGATGGGCATGCGTGACATTAGTTAGTTGGCGGGGTAACGGCCCACCAAGACTATGATGTCTAGGGGTTCTGAGAGGATGATCCCCCACACTGGTACTGAGATACGGACCAGACTCCTACGGGAGGCAGCAGTAGGGAATATTGGTCAATGGGCGAGAGCCTGAACCAGCCATGCCGCGTGCAGGATGACGGCCTTCTGGGTTGTAAACTGCTTTTATACGGGAAGAAAAAACCTTTGCGAAGGGAATTGCCGGTACCGTATGAATAAGCACCGGCTAACTCCGTGCCAGCAGCCGCGGTAATACGGAGGGTGCAAGCGTTGTCCGGATTT…	27F 1492R
ApSp78		Sharp	Astrangia poculata								Bacteroidetes	Flavobacteriia	Flavobacteriales	Flavobacteriaceae	Salinimicrobium	marinum	97.8	DIFCO 2216	2018-12-01	GCACGTCTTCGGATGGTGGCGACCGGCGCACGGGTGCGTAACGCGTATACAATCTACCTTTTACAGGGGCATAGCCCGGGGAAACCCGGATTAATATCCCATGGTATCAAGACATGGCATCATGATTTGATTAAAGCTTCGGCGGTAAAAGATGAGTATGCGTCCTATTAGTTAGTTGGTAAGGTAACGGCTTACCAAGGCAGCGATAGGTAGGGGTCCTGAGAGGGAGATCCCCCACACTGGTACTGAGACACGGACCAGACTCCTACGGGAGGCAGCAGTGAGGAATATTGGACAATGGGCGAGAGCCTGATCCAGCCATGCCGCGTGCAGGAAGACGGCCCTATGGGTTGTAAACTGCTTTTACAGAGGAAGAAACACCCCCTCGTGAGGGGGCTT…	27F 1492R
ApSp79		Sharp	Astrangia poculata								Bacteroidetes	Flavobacteriia	Flavobacteriales	Flavobacteriaceae	Zobellia	laminariae	100	DIFCO 2216	2018-12-01	CTTGCTAGATGTTGACGACCGGCGCACGGGTGCGCAACGCGTATACAATCTACCCCCTACTGTGGGATAGCCCAGAGAAATTTGGATTAAGACCACATAGTACTATATTACGGCATCGTATTTATAGTTAAAGGTTACGGTAGGGGATGAGTATGCGTCCCATTAGTTAGTTGGCGAGGTAACGGCTCACCAAGACCGCGATGGGTAGGGGCCCTGAGAGGGGGATCCCCCACACTGGTACTGAGACACGGACCAGACTCCTACGGGAGGCAGCAGTGAGGAATATTGGACAATGGACGAGAGTCTGATCCAGCCATGCCGCGTGCAGGAAGAATGCCCTATGGGTAGTAAACTGCTTTTATACGGGAAGAAAAAGAGCTACGTGTAGCTTACTGACGG…	27F 1492R
ApSp87		Sharp	Astrangia poculata								Bacteroidetes	Flavobacteriia	Flavobacteriales	Flavobacteriaceae	Cellulophaga	fucicola	97.4	DIFCO 2216	2018-12-01	GCTTGCTCTGCTGACGACCGGCGCACGGGTGCGTAACGCGTATACAATCTGCCTTACACTAAGGGATAGCCCAGAGAAATTTGGATTAATACCTTATAGTTTATTAGGATGGCATCATTTTAATAATAAAGATTACGGTGTAAGATGAGTATGCGTCCCATTAGTTTGTTGGTAAGGTAACGGCTTACCAAGACTACGATGGGTAGGGGCCCTGAGAGGGGGATCCCCCACACTGGTACTGAGACACGGACCAGACTCCTACGGGAGGCAGCAGTGAGGAATATTGGACAATGGGCGAGAGCCTGATCCAGCCATGCCGCGTGCAGGAAGACGGTCCTATGGATTGTAAACTGCTTTTATACAGGAAGAATAAGGACTACGTGTAGTCTGGTGACGGTA…	27F 1492R
ApSp94		Sharp	Astrangia poculata								Bacteroidetes	Flavobacteriia	Flavobacteriales	Flavobacteriaceae	Flavobacterium	micromati	97.5	DIFCO 2216	2018-12-01	GGGTGCGTAACGCGTATGCAATCTACCTTTCACAGAGGGATAGCCCAGAGAAATTTGGATTAATACCTCATAGTATATCGAGTTGGCATCAACATGATATTAAAGATTTATCGGTGAAAGATGAGCATGCGTCCCATTAGCTAGTTGGTATGGTAACGGCATACCAAGGCTACGATGGGTAGGGGTCCTGAGAGGGAGATCCCCCACACTGGTACTGAGACACGGACCAGACTCCTACGGGAGGCAGCAGTGAGGAATATTGGACAATGGGCGCAAGCCTGATCCAGCCATGCCGCGTGCAGGATGACGGTCCTATGGATTGTAAACTGCTTTTATACGAGAAGAAACACTCCTTCGTGAAGGAGCTTGACGGTATCGTAAGAATAAGGATCGGCTAAC…	27F 1492R
ApSp95		Sharp	Astrangia poculata								Bacteroidetes	Flavobacteriia	Flavobacteriales	Flavobacteriaceae	Flavobacterium	micromati	97.5	DIFCO 2216	2018-12-01	GTAAGTGCTTGCACTTATGAGACCGGCGCACGGGTGCGTAACGCGTATGCAATCTACCTTGTTCAAAGGGATAGCCCAGAGAAATTTGGATTAATACCTTATAGTATTATAAAATGGCATCATTTAATAATTAAAGATTTATCGGAACAAGATGAGCATGCGTCCCATTAGCTAGTTGGTATGGTAACGGCATACCAAGGCAATGATGGGTAGGGGTCCTGAGAGGGAGATCCCCCACACTGGTACTGAGACACGGACCAGACTCCTACGGGAGGCAGCAGTGAGGAATATTGGACAATGGGCGCAAGCCTGATCCAGCCATGCCGCGTGCAGGAAGACGGTCCTATGGATTGTAAACTGCTTTTATACAGGAAGAAACACCTCTACGTGTAGAGACTT…	27F 1492R
2-PAM-O1		Kuek	Pocillopora acuta								Bacteroidetes	Flavobacteriia	Flavobacteriales	Flavobacteriaceae	Aquimarina	penaei	96.70	Minimal basal agar	2019-02-11	TGCAGTCGAGGGGTAACAGAGATTGCTTGCAATCTGCTGACGACCGGCGCACGGGTGCGTAACGCGTATAGAACCTACCT TATATTGGGGGATAGCCCAGAGAAATTTGGATTAATACCCCATAGTATATTGAGATGGCATCGTTTTAATATTAAAGATT TATCGATATAAGATGGCTATGCGTTCTATTAGCTAGTTGGTTAGGTAACGGCTGACCAAGGCGACGATAGATAGGGGTCC TGAGAGGGAGATCCCCCACACTGGTACTGAGACACGGACCAGACTCCTACGGGAGGCAGCAGTGAGGAATATTGGACAAT GGAGGCAACTCTGATCCAGCCATGCCGCGTGCAGGAAGACTGCCCTATGGGTTGTAAACTGCTTTTATAGAGGAA…	27f 1492r
2-PAM-W3		Kuek	Pocillopora acuta								Bacteroidetes	Flavobacteriia	Flavobacteriales	Flavobacteriaceae	Muricauda	pacifica	95.13	Minimal basal agar	2019-02-11	TGCAGTCGAGGGGTAACAGGAAAAAGCTTGCTTTTTTGCTGACGACCGGCGCACGGGTGCGGAACGCGTATGGAACCTGC CCCTGTCAGGGGAATAGCCCAGAGAAATTTGGATTAATGCCCCATGGTAACATTATATCGCATGATATTTTGTTTAAAGA TTTATCGGACAGGGATGGCCATGCGTACCATTAGCTTGTTGGTGAGGTAACGGCTCACCAAGGCAACGATGGTTAGGGGC CCTGAGAGGGGGATCCCCCACACTGGTACTGAGACACGGACCAGACTCCTACGGGAGGCAGCAGTGAGGAATATTGGACA ATGGTCGGGAGACTGATCCAGCCATGCCGCGTGCAGGATGACTGCCCTATGGGTTGTAAACTGCTTTTATACGGG…	27f 1492r
2-PAM-Y1		Kuek	Pocillopora acuta								Bacteroidetes	Flavobacteriia	Flavobacteriales	Flavobacteriaceae	Aquimarina	salinaria	97.29	Minimal basal agar	2019-02-11	GCAGTCGAGGGGTAACAGGTAGTGCTTGCACTATGCTGACGACCGGCGCACGGGTGCGTAACGCGTATAGAACCTACCTT ATATTGGGGGATAGCCCAGAGAAATTTGGATTAATACCCCATAGTATGCTGAAGTGGCATCGCTTTAGTATTAAAGATTT ATCGATATAAGATGGCTATGCGTTCTATTAGCTAGTTGGTATGGTAACGGCATACCAAGGCTACGATAGATAGGGGTCCT GAGAGGGAGATCCCCCACACTGGTACTGAGACACGGACCAGACTCCTACGGGAGGCAGCAGTGAGGAATATTGGACAATG GAGGCAACTCTGATCCAGCCATGCCGCGTGCAGGAAGACTGCCCTATGGGTTGTAAACTGCTTTTATAGAGGAAG…	27f 1492r
2-PAT-O2		Kuek	Pocillopora acuta								Bacteroidetes	Flavobacteriia	Flavobacteriales	Flavobacteriaceae	Maribacter	cobaltidurans	95.62	Minimal basal agar	2019-02-11	GCAGTCGAGGGGTAACAGGGAGTGCTTGCACTCCGCTGACGACCGGCGCACGGGTGCGCACCGCGTATGGAACCTACCTT TTACAGGGGGATAGCCCAGGGAAACTTGGATTAATACCCCGTAGTACCTATTTCCGGCATTGGGGATCGGTTAAAGGCTT CGGCCGGTAGAAGATGGCCATGCGTCCCATTAGCTAGTTGGTAAGGTAACGGCTTACCAAGGCGACGATGGGTAGGGGCC CTGAGAGGGGGATCCCCCACACTGGTACTGAGACACGGACCAGACTCCTACGGGAGGCAGCAGTGAGGAATATTGGACAA TGGGCGGGAGCCTGATCCAGCCATGCCGCGTGCAGGAAGAATGCCCTATGGGTAGTAAACTGCTTTTATACGGGA…	27f 1492r
2-PAT-Y2		Kuek	Pocillopora acuta								Bacteroidetes	Flavobacteriia	Flavobacteriales	Flavobacteriaceae	Muricauda	lutea	93.97	Minimal basal agar	2019-02-11	TATGCTTGCAACCAGATGACGAGTGGCGCACGGGTGCGGAACGCGTATCGAACCTGCCCCCTTCAGGAGGATAGCCCATG GAAACGTGGATTAATACTCCATAGTACCATGATGTTGCATGACATTGTGGTTAAAGATTTATCGGAAGGGGATGGCGATG CGTACCATTAGTTAGTTGGTAAGGTAACGGCTTACCAAGGCAACGATGGTTAGGGGCCCTGAGAGGGGGATCCCCCACAC TGGTACTGAGACACGGACCAGACTCCTACGGGAGGCAGCAGTGAGGAATATTGGACAATGGTGGGAACACTGATCCAGCC ATGCCGCGTGCAGGATGACTGCCCTATGGGTTGTAAACTGCTTTTATACGGGAAGAAACCCGGGTACGTGTACCC…	27f 1492r
2-SPT-Y1		Kuek	Stylophora pistillata								Bacteroidetes	Flavobacteriia	Flavobacteriales	Flavobacteriaceae	Aquimarina	spongiae	99.21	Minimal basal agar	2019-02-11	TGCAGTCGAGGGGTAACAGGAGATTGCTTGCAATCTTGCTGACGACCGGCGCACGGGTGCGTAACGCGTATAGAACCTAC CTTATATTGGGGGATAGCCCAGAGAAATTTGGATTAATACCCCATGGTATGCTAGAGTGGCATCACTTTAGTATTAAAGA TTTATCGATATAAGATGGCTATGCGTTCTATTAGCTAGTTGGTAAGGTAACGGCTCACCAAGGCGACGATAGATAGGGGT CCTGAGAGGGAGATCCCCCACACTGGTACTGAGACACGGACCAGACTCCTACGGGAGGCAGCAGTGAGGAATATTGGACA ATGGAGGCAACTCTGATCCAGCCATGCCGCGTGCAGGAAGACTGCCCTATGGGTTGTAAACTGCTTTTATAGAGG…	27f 1492r
3-AMM-3		Kuek	Acropora millepora								Bacteroidetes	Flavobacteriia	Flavobacteriales	Flavobacteriaceae	Aquimarina	hainanensis	99.93	Minimal basal agar	2019-02-11	TGCAGTCGAGGGGTAACAGGAGATTGCTTGCAATCTTGCTGACGACCGGCGCACGGGTGCGTAACGCGTATAGAACCTAC CTTTAAGTAAGGGATAGCCCAGAGAAATTTGGATTAATACCTTATAGTATTATTTGATTGCATAATTAAATAATTAAAGA TTTATCGCTTAGAGATGGCTATGCGTTCTATTAGCTAGTTGGTATGGTAACGGCATACCAAGGCTACGATAGATAGGGGT CCTGAGAGGGAGATCCCCCACACTGGTACTGAGACACGGACCAGACTCCTACGGGAGGCAGCAGTGAGGAATATTGGACA ATGGAGGCAACTCTGATCCAGCCATGCCGCGTGTAGGAAGACTGCCCTATGGGTTGTAAACTACTTTTATAGAGG…	27f 1492r
3-AMM-6		Kuek	Acropora millepora								Bacteroidetes	Flavobacteriia	Flavobacteriales	Flavobacteriaceae	Kordia	periserrulae	97.47	Minimal basal agar	2019-02-11	CAGTCGAGGGGCAGCATGGATTGCTTGCAATCTGATGGCGACCGGCGCACGGGTGCGTAACGCGTATGAAACCTACCTAA TACAGGGGGATAGCCCAGAGAAATTTGGATTAATACCCCATGGTACTGTTATCTCGCATGGGATAATAGTTAAAGATTTA TCGGTATTAGATGGTCATGCGTTCTATTAGTTAGTTGGTAAGGTAACGGCTTACCAAGACATCGATAGATAGGGGCCCTG AGAGGGGGATCCCCCACACTGGTACTGAGACACGGACCAGACTCCTACGGGAGGCAGCAGTGAGGAATATTGGACAATGG AGGCAACTCTGATCCAGCCATGCCGCGTGAAGGAAGACTGCCCTATGGGTTGTAAACTTCTTTTATAGAGGAAGA…	27f 1492r
3-AMT-5		Kuek	Acropora millepora								Bacteroidetes	Flavobacteriia	Flavobacteriales	Flavobacteriaceae	Meridianimaribacter	flavus	95.33	Minimal basal agar	2019-02-11	GCAGTCGAGGGGTAACAGGAAGAAGCTTGCTTTTTTGCTGACGACCGGCGCACGGGTGCGTAACGCGTATACATCTACCT CTTACTGAGGGATAGCCCAGAGAAATTTGGATTAACACCTCATAGTATGATGATTCGGCATCGGATTTTCATTAAAGGTT ACGGTAAGAGATGAGTATGCGTTCTATTAGCTAGTAGGTATGGTAACGGCATACCTAGGCAACGATAGATAGGGGCCCTG AGAGGGGGATCCCCCACACTGGTACTGAGACACGGACCAGACTCCTACGGGAGGCAGCAGTGAGGAATATTGGTCAATGG GCGCAAGCCTGAACCAGCCATGCCGCGTGCAGGAAGACTGCCCTATGGGTTGTAAACTGCTTTTATACAGGAAGA…	27f 1492r
3-AMT-7		Kuek	Acropora millepora								Bacteroidetes	Flavobacteriia	Flavobacteriales	Flavobacteriaceae	Tenacibaculum	litopenaei	99.78	Minimal basal agar	2019-02-11	GCAGTCGAGGGGCAGCGTAGATTGCTTGCAATCTGACGGCGACCGGCGAACGGGTGCGTAACGCGTATAGAATCTGCCTT GTACAGGAGGATAGCCTTTAGAAATGAAGATTAATACTCCATAATGCTRAGAGATGGCATCATTTTTTAGTTAAAGATTT ATCGGTACAAGATGACTATGCGTCCTATTAGCTAGATGGTAAGGTAACGGCTTACCATGGCAACGATAGGTAGGGGGTCT GAGAGGATTATCCCCCACACTGGTACTGAGACACGGACCAGACTCCTACGGGAGGCAGCAGTGAGGAATATTGGTCAATG GGCGCAAGCCTGAACCAGCCATGCCGCGTGCAGGATGACTGCCCTATGGGTTGTAAACTGCTTTTATACAGGAAG…	27f 1492r
3-ATM-5		Kuek	Acropora tenuis								Bacteroidetes	Flavobacteriia	Flavobacteriales	Flavobacteriaceae	Eudoraea	chungangensis	99.21	Minimal basal agar	2019-02-11	GCAGTCGAACGGTAACAGGGAATTGCTTGCAATCCGCTGACGAGTGGCGCACGGGTGCGCAACGCGTATAGAACCTACCC TGTACAGGGGGATAGCCCAGAGAAATTTGGATTAATACCCCGTAGTACCTATAAGAGGCATTTTTTATAGGTTATAGTTT TCGAACGGTATAGGATGGCTATGCGTCTTATTAGCTAGTAGGTAAGGTAACGGCTTACCTAGGCTACGATAAGTAGGGGC CCTGAGAGGGGGATCCCCCACACTGGTACTGAGACACGGACCAGACTCCTACGGGAGGCAGCAGTGAGGAATATTGGACA ATGGGCGGAAGCCTGATCCAGCCATGCCGCGTGCAGGAAGACGGCCCTATGGGTTGTAAACTGCTTTTATACGGG…	27f 1492r
3-ATM-6		Kuek	Acropora tenuis								Bacteroidetes	Flavobacteriia	Flavobacteriales	Flavobacteriaceae	Aquimarina	zeaxanthinifaciens	91.46	Minimal basal agar	2019-02-11	TGCAGTCGAGGGGTAACAGGGATTGCTTGCAATCCGCTGACGACCGGCGCACGGGTGCGTAACGCGTATACATCTACCTT TTGCTGCGGGATAGCCCAGAGAAATTTGGATTAACACCGCATGGTATGTATTTACGGCATCGTAGATACATTAAAGGTTA CGGCAAAAGATGAGTATGCGTTCTATTAGCTAGATGGTAAGGTAACGGCTTACCATGGCTACGATAGATAGGGGCCCTGA GAGGGGGATCCCCCACACTGGTACTGAGACACGGACCAGACTCCTACGGGAGGCAGCAGTGAGGAATATTGGACAATGGA GGGAACTCTGATCCAGCCATGCCGCGTGCAGGAAGACTGCCCTATGGGTTGTAAACTGCTTTTATACAGGAAGAA…	27f 1492r
3-ATM-8		Kuek	Acropora tenuis								Bacteroidetes	Flavobacteriia	Flavobacteriales	Flavobacteriaceae	Aquimarina	seongsanensis	96.18	Minimal basal agar	2019-02-11	GCAGTCGAGGGGTAACATTAGTGCTTGCACTAGATGACGACCGGCGCACGGGTGCGTAACGCGTATAGAACCTACCTTTT ACTGGAGAATAGCCCAGAGAAATTTGGATTAATGCTCCATAGTATGTTGATTTGGCATCGGATTGACATTAAAGATTTAT TGGTAAAAGATGGCTATGCGTTCTATTAGCTAGTTGGTGTGGTAACGGCATACCAAGGCTACGATAGATAGGGGTCCTGA GAGGGAGATCCCCCACACTGGTACTGAGACACGGACCAGACTCCTACGGGAGGCAGCAGTGAGGAATATTGGACAATGGA GGCAACTCTGATCCAGCCATGCCGCGTGCAGGAAGACTGCCCTATGGGTTGTAAACTGCTTTTATAGAGGAAGAA…	27f 1492r
3-ATT-2		Kuek	Acropora tenuis								Bacteroidetes	Flavobacteriia	Flavobacteriales	Flavobacteriaceae	Croceitalea	eckloniae	96.04	Minimal basal agar	2019-02-11	TGCAGTCGAGGGGCAGCACGGATTGCTTGCAATCTGGTGGCGACCGGCGCACGGGTGCGGAACGCGTATGGAACCTGCCC CTGTCAGGGGAATAGCCCAGAGAAATTTGGATTAATGCCCCATGGTATCGGGATATCGCATGATATTCTGATTAAAGATT TATCGGACAGGGATGGCCATGCGTACCATTAGCTAGTTGGTGAGGTAACGGCTTACCAAGGCAACGATGGTTAGGGGCCC TGAGAGGGGGATCCCCCACACTGGTACTGAGACACGGACCAGACTCCTACGGGAGGCAGCAGTGAGGAATATTGGACAAT GGGCGGGAGCCTGATCCAGCCATGCCGCGTGCAGGATGACTGCCCTATGGGTTGTAAACTGCTTTTATACGGGAA…	27f 1492r
AMM-P-4		Kuek	Acropora millepora								Bacteroidetes	Flavobacteriia	Flavobacteriales	Flavobacteriaceae	Aquimarina	spongiae	98.86	Minimal basal agar	2019-02-11	TGCAGTCGAGGGGTAACAGGAGATTGCTTGCAATCTTGCTGACGACCGGCGCACGGGTGCGTAACGCGTATAGAACCTAC CTTATATTGGGGGATAGCCCAGAGAAATTTGGATTAATACCCCATAGTATGCTGAATTGGCATCAGTTTAGTATTAAAGA TTTATCGATATAAGATGGCTATGCGTTCTATTAGCTAGTTGGTAAGGTAACGGCTCACCAAGGCGACGATAGATAGGGGT CCTGAGAGGGAGATCCCCCACACTGGTACTGAGACACGGACCAGACTCCTACGGGAGGCAGCAGTGAGGAATATTGGACA ATGGAGGCAACTCTGATCCAGCCATGCCGCGTGCAGGAAGACTGCCCTATGGGTTGTAAACTGCTTTTATAGAGG…	27f 1492r
AMM-S-14		Kuek	Acropora millepora								Bacteroidetes	Flavobacteriia	Flavobacteriales	Flavobacteriaceae	Tenacibaculum	litopenaei	99.71	Minimal basal agar	2019-02-11	CATGCAGTCGAGGGGCAGCGTAGATTGCTTGCAATCTGACGGCGACCGGCGAACGGGTGCGTAACGCGTATAGAATCTGC CTTGTACAGGAGGATAGCCTTTAGAAATGAAGATTAATACTCCATAATGCTGAGAGATGGCATCATTTTTTAGTTAAAGA TTTATCGGTACAAGATGACTATGCGTCCTATTAGCTAGATGGTAAGGTAACGGCTTACCATGGCAACGATAGGTAGGGGG TCTGAGAGGATTATCCCCCACACTGGTACTGAGACACGGACCAGACTCCTACGGGAGGCAGCAGTGAGGAATATTGGTCA ATGGGCGCAAGCCTGAACCAGCCATGCCGCGTGCAGGATGACTGCCCTATGGGTTGTAAACTGCTTTTATACAGG…	27f 1492r
AM-O-28		Kuek	Acropora millepora								Bacteroidetes	Flavobacteriia	Flavobacteriales	Flavobacteriaceae	Tenacibaculum	skagerrakense	99.56	Minimal basal agar	2019-02-11	TGCAGTCGAGGGGTAGCAGGGAAAAGCTTGCTTTTTTGCTGACGACCGGCGAACGGGTGCGTAACGCGTATAGAATCTGC CTTGTACAGGAGGATAGCCTTTAGAAATGAAGATTAATACTCCATAGTGTATAGAAGTGGCATCACTTTTTTACTAAAGA TTTATTGGTACAAGATGACTATGCGTCCTATTAGCTAGATGGTAAGGTAACGGCTTACCATGGCTACGATAGGTAGGGGG TCTGAGAGGACTATCCCCCACACTGGTACTGAGACACGGACCAGACTCCTACGGGAGGCAGCAGTGAGGAATATTGGTCA ATGGAGGCAACTCTGAACCAGCCATGCCGCGTGCAGGAAGACTGCCCTATGGGTTGTAAACTGCTTTTATACAGG…	27f 1492r
AMT13		Kuek	Acropora millepora								Bacteroidetes	Flavobacteriia	Flavobacteriales	Flavobacteriaceae	Tenacibaculum	aiptasiae	99.56	Minimal basal agar	2019-02-11	TGCAGTCGAGGGGTAACAGGAGAAAGCTTGCTTTTTTGCTGACGACCGGCGAACGGGTGCGTAACGCGTATAGAATCTGC CTTGTACAGGAGGATAGCCTTTAGAAATGAAGATTAATACTCCATAATATTGGGAAGTGGCATCACTATCTAATTAAACA TTTATGGGTACAAGATGACTATGCGTCCTATTAGCTAGATGGTAAGGTAACGGCTTACCATGGCAACGATAGGTAGGGGG TCTGAGAGGATTATCCCCCACACTGGTACTGAGACACGGACCAGACTCCTACGGGAGGCAGCAGTGAGGAATATTGGTCA ATGGAGGCAACTCTGAACCAGCCATGCCGCGTGCAGGAAGACTGCCCTATGGGTTGTAAACTGCTTTTATACAGG…	27f 1492r
AMT14		Kuek	Acropora millepora								Bacteroidetes	Flavobacteriia	Flavobacteriales	Flavobacteriaceae	Tenacibaculum	jejuense	98.27	Minimal basal agar	2019-02-11	TGCAGTCGAGGGGCAGCATCAATTGCTTGCAATTGGATGGCGACCGGCGCACGGGTGCGTAACGCGTATAGAATCTGCCT TGTACAGGAGGATAGCCTTTAGAAATGAAGATTAATACTCCATAATGTTGAGATATGGCATCATATTTTAATTAAAGATT TATCGGTACAAGATGACTATGCGTCCTATTAGCTAGATGGTAAGGTAACGGCTTACCATGGCTACGATAGGTAGGGGGTC TGAGAGGATTATCCCCCACACTGGTACTGAGACACGGACCAGACTCCTACGGGAGGCAGCAGTGAGGAATATTGGTCAAT GGAGGCAACTCTGAACCAGCCATGCCGCGTGTAGGAAGACTGCCCTATGGGTTGTAAACTACTTTTATATGGGAA…	27f 1492r
AT-O-23		Kuek	Acropora tenuis								Bacteroidetes	Flavobacteriia	Flavobacteriales	Flavobacteriaceae	Tenacibaculum	skagerrakense	99.56	Minimal basal agar	2019-02-11	GCAGTCGAGGGGTAGCAGGGAAAAGCTTGCTTTTTTGCTGACGACCGGCGAACGGGTGCGTAACGCGTATAGAATCTGCC TTGTACAGGAGGATAGCCTTTAGAAATGAAGATTAATACTCCATAGTGTATAGAAGTGGCATCACTTTTTTACTAAAGAT TTATTGGTACAAGATGACTATGCGTCCTATTAGCTAGATGGTAAGGTAACGGCTTACCATGGCTACGATAGGTAGGGGGT CTGAGAGGACTATCCCCCACACTGGTACTGAGACACGGACCAGACTCCTACGGGAGGCAGCAGTGAGGAATATTGGTCAA TGGAGGCAACTCTGAACCAGCCATGCCGCGTGCAGGAAGACTGCCCTATGGGTTGTAAACTGCTTTTATACAGGA…	27f 1492r
Fun-124	DQ107404	Lampert et al, 2006	Fungia scutaria (mucus)		healthy	25	Gulf of Eilat, northern Red Sea	mucus	25		Firmicutes	Bacilli	Bacillales	Staphylococcaceae	Staphylococcus	sp.	99	Marine agar	28-JUN-2005	GGCGGCCTAATACATGCAAGTCGAGCGAACAGATAAGGAGCTTGCTCCTTTGACGTTAGCGGCGGACGGGTGAGTAACACGTGGATAACCTACCTATAAGACTGGGATAACTTCGGGAAACCGGAGCTAATACCGGATAACATATTGAACCGCATGGTTCAATAGTGAAAGGCGGCTTTGCTGTCACTTATAGATGGATCCGCGCCGTATTAGCTAGTTGGTAAGGTAACGGCTTACCAAGGCAACGATACGTAGCCGACCTGAGAGGGTGATCGGCCACACTGGAACTGAGACACGGTCCAGACTCCTACGGGAGGCAGCAGTAGGGAATCTTCCGCAATGGGCGAAAGCCTGACGGAGCAACGCCGCGTGAGTGATGAAGGTCTTCGGATCGTAAAA…	8-27f 1492r
AmSamW5	GU903197	Wilson et al., 2012	Acropora corals				Vatia Bay, on the north side of the island of Tutuila (140°14′S, 1700°40′W), American Samoa,	mucus		https://academic.oup.com/femsec/article/80/2/509/527606#95181137	Firmicutes	Bacilli	Bacillales	Bacillaceae	Bacillus	sp.	99	marine agar and Vibrio-specific thiosulphate citrate bile sucrose (TCBS) agar	19-FEB-2010	GCTCCGGAGTTAGCGGCGGACGGGTGAGTAACACGTAGGTAACCTGCCCCTTAGACTGGGATAACTCCGGGAAACCGGAGCTAATACGGGATAATAAAGAGAATCGCCTGATTTTCTTTTGAAAGACGGCGTCTAGCTGTCACTAAGGGATGGACCTGCGGCGCATTAGCTAGTTGGTAAGGTAACGGCTTACCAAGGCGACGATGCGTAGCCGACCTGAGAGGGTGATCGGCCACACTGGGACTGAGACACGGCCCAGACTCCTACGGGAGGCAGCAGTAGGGAATCTTCCGCAATGGACGAAAGTCTGACGGAGCAACGCCGCGTGAGTGAGGAAGGCCTTCGGGTCGTAAAGCTCTGTTGTGAGGGAAGAACAAGTGCCGGCGTAACTACCGGCAC…	63F 1389R	https://academic.oup.com/femsec/article/80/2/509/527606#95181137
AmSamW23	GU903214	Wilson et al., 2012	Acropora corals				Vatia Bay, on the north side of the island of Tutuila (140°14′S, 1700°40′W), American Samoa,	mucus			Firmicutes	Bacilli	Bacillales	Bacillaceae	Bacillus	sp.	100	marine agar and Vibrio-specific thiosulphate citrate bile sucrose (TCBS) agar	19-FEB-2010	GTCAGCGGCGGACGGGTGAGTAACACGTGGGCAACCTGCCTGTGAGACTGGGATAACTTCGGGAAACCGGAGCTAATACCGGATAATATAAGGAACCTCCTGGTTCTTTATTGAAAGATGGTTTCGGCTATCACTCACAGATGGGCCCGCGGCGCATTAGCTAGTTGGTGAGGTAACGGCTCACCAAGGCGACGATGCGTAGCCGACCTGAGAGGGTGATCGGCCACACTGGGACTGAGACACGGCCCAGACTCCTACGGGAGGCAGCAGTAGGGAATCTTCCACAATGGACGAAAGTCTGATGGAGCAACGCCGCGTGAGCGATGAAGGCCTTCGGGTCGTAAAGCTCTGTTGTTAGGGAAGAACAAGTGCGAGAGTAACTGCTCGCACCTTGACGGT…	63F 1389R
AmSamW35	GU903223	Wilson et al., 2012	Acropora corals				Vatia Bay, on the north side of the island of Tutuila (140°14′S, 1700°40′W), American Samoa,	mucus			Firmicutes	Bacilli	Bacillales	Bacillaceae	Bacillus	sp.	99	marine agar and Vibrio-specific thiosulphate citrate bile sucrose (TCBS) agar	19-FEB-2010	GGTAGCGGCGGACGGGTGAGTAACACGTGGGCAACCTGCCTGTGAGACTGGGATAACTTCGGGAAACCGGAGCTAATACCGGATAATATAAGGAACCTCCTGGTTCTTTATTGAAAGATGGTTTCGGCTATCACTCACAGATGGGCCCGCGGCGCATTAGCTAGTTGGTGAGGTAACGGCTCACCAAGGCGACGATGCGTAGCCGACCTGAGAGGGTGATCGGCCACACTGGGACTGAGACACGGCCCAGACTCCTACGGGAGGCAGCAGTAGGGAATCTTCCACAATGGACGAAAGTCTGATGGAGCAACGCCGCGTGAGCGATGAAGGCCTTCGGGTCGTAAAGCTCTGTTGTTAGGGAAGAACAAGTGCGAGAGTAACTGCTCGCACCTTGACGGT…	63F 1389R
AmSamW37	GU903225	Wilson et al., 2012	Acropora corals				Vatia Bay, on the north side of the island of Tutuila (140°14′S, 1700°40′W), American Samoa,	mucus			Firmicutes	Bacilli	Bacillales	Bacillaceae	Oceanobacillus	sp.	99	marine agar and Vibrio-specific thiosulphate citrate bile sucrose (TCBS) agar	19-FEB-2010	GCTGATCCCTTCGGGGGTGACGCTTGTGGAATGAGCGGCGGACGGGTGAGTAACACGTGGGCAACCTGCCTGTAAGACTGGGATAACCCCGGGAAACCGGGGCTAATACCGGATAATACTTTCTTTTGCATAAAGGAAAGTTGAAAGGCGGCTTCGGCTGTCACTTACAGATGGGCCCGCGGCGCATTAGCTAGTTGGTGAGGTAACGGCTCACCAAGGCGACGATGCGTAGCCGACCTGAGAGGGTGATCGGCCACACTGGGACTGAGACACGGCCCAGACTCCTACGGGAGGCAGCAGTAGGGAATCTTCCGCAATGGACGAAAGTCTGACGGAGCAACGCCGCGTGAGTGATGAAGGTTTTCGGATCGTAAAACTCTGTTGTTAGGGAAGAACAAG…	63F 1389R
AmSamW39	GU903227	Wilson et al., 2012	Acropora corals				Vatia Bay, on the north side of the island of Tutuila (140°14′S, 1700°40′W), American Samoa,	mucus			Firmicutes	Bacilli	Bacillales	Bacillaceae	Bacillus	sp.	100	marine agar and Vibrio-specific thiosulphate citrate bile sucrose (TCBS) agar	19-FEB-2010	GAGTTAGCGGCGGACGGGTGAGTAACACGTAGGTAACCTGCCCCTTAGACTGGGATAACTCCGGGAAACCGGAGCTAATACGGGATAATAAAGAGAATCGCCTGATTTTCTTTTGAAAGACGGCGTCTAGCTGTCACTAAGGGATGGACCTGCGGCGCATTAGCTAGTTGGTAAGGTAACGGCTTACCAAGGCGACGATGCGTAGCCGACCTGAGAGGGTGATCGGCCACACTGGGACTGAGACACGGCCCAGACTCCTACGGGAGGCAGCAGTAGGGAATCTTCCGCAATGGACGAAAGTCTGACGGAGCAACGCCGCGTGAGTGAGGAAGGCCTTCGGGTCGTAAAGCTCTGTTGTGAGGGAAGAACAAGTGCCGGCGTAACTACCGGCACCTTGAC…	63F 1389R
AmSamW62	GU903249	Wilson et al., 2012	Acropora corals				Vatia Bay, on the north side of the island of Tutuila (140°14′S, 1700°40′W), American Samoa,	mucus			Firmicutes	Bacilli	Bacillales	Bacillaceae	Bacillus	sp.	100	marine agar and Vibrio-specific thiosulphate citrate bile sucrose (TCBS) agar	19-FEB-2010	TTGAAGGTCAGCGGCGGACGGGTGAGTAACACGTGGGCAACCTGCCTGTGAGACTGGGATAACTTCGGGAAACCGGAGCTAATACCGGATAATATAAGGAACCTCCTGGTTCTTTATTGAAAGATGGTTTCGGCTATCACTCACAGATGGGCCCGCGGCGCATTAGCTAGTTGGTGAGGTAACGGCTCACCAAGGCGACGATGCGTAGCCGACCTGAGAGGGTGATCGGCCACACTGGGACTGAGACACGGCCCAGACTCCTACGGGAGGCAGCAGTAGGGAATCTTCCACAATGGACGAAAGTCTGATGGAGCAACGCCGCGTGAGCGATGAAGGCCTTCGGGTCGTAAAGCTCTGTTGTTAGGGAAGAACAAGTGCGAGAGTAACTGCTCGCACCTT…	63F 1389R
AmSamW63	GU903250	Wilson et al., 2012	Acropora corals				Vatia Bay, on the north side of the island of Tutuila (140°14′S, 1700°40′W), American Samoa,	mucus			Firmicutes	Bacilli	Bacillales	Bacillaceae	Bacillus	sp.	99	marine agar and Vibrio-specific thiosulphate citrate bile sucrose (TCBS) agar	19-FEB-2010	TGCTCGGAGTTAGCGGCGGACGGGTGAGTAACACGTAGGTAACCTGCCCCTTAGACTGGGATAACTCCGGGAAACCGGAGCTAATACGGGATAATAAAGAGAATCGCCTGATTTTCTTTTGAAAGACGGCGTCTAGCTGTCACTAAGGGATGGACCTGCGGCGCATTAGCTAGTTGGTAAGGTAACGGCTTACCAAGGCGACGATGCGTAGCCGACCTGAGAGGGTGATCGGCCACACTGGGACTGAGACACGGCCCAGACTCCTACGGGAGGCAGCAGTAGGGAATCTTCCGCAATGGACGAAAGTCTGACGGAGCAACGCCGCGTGAGTGAGGAAGGCCTTCGGGTCGTAAAGCTCTGTTGTGAGGGAAGAACAAGTGCCGGCGTAACTACCGGCAC…	63F 1389R
AmSamW86	GU903269	Wilson et al., 2012	Acropora corals				Vatia Bay, on the north side of the island of Tutuila (140°14′S, 1700°40′W), American Samoa,	mucus			Firmicutes	Bacilli	Bacillales	Bacillaceae	Bacillus	sp.	99	marine agar and Vibrio-specific thiosulphate citrate bile sucrose (TCBS) agar	19-FEB-2010	TTTGAAGGTCAGCGGCGGACGGGTGAGTAACACGTGGGCAACCTGCCTGTGAGACTGGGATAACTTCGGGAAACCGGAGCTAATACCGGATAATATAAGGAACCTCCTGGTTCTTTATTGAAAGATGGTTTCGGCTATCACTCACAGATGGGCCCGCGGCGCATTAGCTAGTTGGTGAGGTAACGGCTCACCAAGGCGACGATGCGTAGCCGACCTGAGAGGGTGATCGGCCACACTGGGACTGAGACACGGCCCAGACTCCTACGGGAGGCAGCAGTAGGGAATCTTCCACAATGGACGAAAGTCTGATGGAGCAACGCCGCGTGAGCGATGAAGGCCTTCGGGTCGTAAAGCTCTGTTGTTAGGGAAGAACAAGTGCGAGAGTAACTGCTCGCACCT…	63F 1389R
AmSamHH1	GU903192	Wilson et al., 2012	Acropora corals				Vatia Bay, on the north side of the island of Tutuila (140°14′S, 1700°40′W), American Samoa,	mucus			Firmicutes	Bacilli	Bacillales	Staphylococcaceae	Staphylococcus	sp.	100	marine agar and Vibrio-specific thiosulphate citrate bile sucrose (TCBS) agar	19-FEB-2010	AGCCTTGCTCCTTTGACGTTAGCGGCGGACGGGTGAGTAACACGTGGGTAACCTACCTATAAGACTGGGATAACTTCGGGAAACCGGAGCTAATACCGGATAACATTTGGAACCGCATGGTTCTAAAGTGAAAGATGGTTTTGCTATCACTTATAGATGGACCCGCGCCGTATTAGCTAGTTGGTAAGGTAACGGCTTACCAAGGCGACGATACGTAGCCGACCTGAGAGGGTGATCGGCCACACTGGAACTGAGACACGGTCCAGACTCCTACGGGAGGCAGCAGTAGGGAATCTTCCGCAATGGGCGAAAGCCTGACGGAGCAACGCCGCGTGAGTGATGAAGGGTTTCGGCTCGTAAAACTCTGTTATTAGGGAAGAACAAACGTGTAAGTAACTG…	63F 1389R
AmSamHH9	GU903201	Wilson et al., 2012	Acropora corals				Vatia Bay, on the north side of the island of Tutuila (140°14′S, 1700°40′W), American Samoa,	mucus			Firmicutes	Bacilli	Bacillales	Staphylococcaceae	Staphylococcus	sp.	100	marine agar and Vibrio-specific thiosulphate citrate bile sucrose (TCBS) agar	19-FEB-2010	TGCTCCTTTGACGTTAGCGGCGGACGGGTGAGTAACACGTGGGTAACCTACCTATAAGACTGGGATAACTTCGGGAAACCGGAGCTAATACCGGATAACATTTGGAACCGCATGGTTCTAAAGTGAAAGATGGTTTTGCTATCACTTATAGATGGACCCGCGCCGTATTAGCTAGTTGGTAAGGTAACGGCTTACCAAGGCGACGATACGTAGCCGACCTGAGAGGGTGATCGGCCACACTGGAACTGAGACACGGTCCAGACTCCTACGGGAGGCAGCAGTAGGGAATCTTCCGCAATGGGCGAAAGCCTGACGGAGCAACGCCGCGTGAGTGATGAAGGGTTTCGGCTCGTAAAACTCTGTTATTAGGGAAGAACAAACGTGTAAGTAACTGTGCAC…	63F 1389R
AmSamHH14	GU903206	Wilson et al., 2012	Acropora corals				Vatia Bay, on the north side of the island of Tutuila (140°14′S, 1700°40′W), American Samoa,	mucus			Firmicutes	Bacilli	Bacillales	Staphylococcaceae	Staphylococcus	sp.	100	marine agar and Vibrio-specific thiosulphate citrate bile sucrose (TCBS) agar	19-FEB-2010	CCTTTGACGTTAGCGGCGGACGGGTGAGTAACACGTGGGTAACCTACCTATAAGACTGGGATAACTTCGGGAAACCGGAGCTAATACCGGATAACATTTGGAACCGCATGGTTCTAAAGTGAAAGATGGTTTTGCTATCACTTATAGATGGACCCGCGCCGTATTAGCTAGTTGGTAAGGTAACGGCTTACCAAGGCGACGATACGTAGCCGACCTGAGAGGGTGATCGGCCACACTGGAACTGAGACACGGTCCAGACTCCTACGGGAGGCAGCAGTAGGGAATCTTCCGCAATGGGCGAAAGCCTGACGGAGCAACGCCGCGTGAGTGATGAAGGGTTTCGGCTCGTAAAACTCTGTTATTAGGGAAGAACAAATGTGTAAGTAACTGTGCACATCT…	63F 1389R
AmSamHH51i	GU903238	Wilson et al., 2012	Acropora corals				Vatia Bay, on the north side of the island of Tutuila (140°14′S, 1700°40′W), American Samoa,	mucus			Firmicutes	Bacilli	Bacillales	Staphylococcaceae	Salinicoccus	sp.	99	marine agar and Vibrio-specific thiosulphate citrate bile sucrose (TCBS) agar	19-FEB-2010	TGACGCGAGTGGCGGACGGGTGAGTAACACGTAGGCAACCTGCCCATCAGACCGGGATAACCACGGGAAACCGTGGCTAATACCGGATAATCCTTTTCTTCACAGGAAGGAAAGTTGAAAGGCGGCTTCGGCTGTCACTGATGGATGGGCCTGCGGCGCATTAGCTAGTTGGTGGGGTAAGGGCCCACCAAGGCGACGATGCGTAGCCGACCTGAGAGGGTGATCGGCCACACTGGGACTGAGACACGGCCCAGACTCCTACGGGAGGCAGCAGTAGGGAATCTTCCGCAATGGACGCAAGTCTGACGGAGCAACGCCGCGTGAGTGAAGAAGGGTTTCGGCTCGTAAAACTCTGTTGTCAGGGAAGAACGTCCCCGTGAGTAACTGCACGGGGAGTGA…	63F 1389R
AmSamHD7	GU903199	Wilson et al., 2012	Acropora corals				Vatia Bay, on the north side of the island of Tutuila (140°14′S, 1700°40′W), American Samoa,	mucus			Firmicutes	Bacilli	Bacillales	Bacillaceae	Bacillus	sp.	99	marine agar and Vibrio-specific thiosulphate citrate bile sucrose (TCBS) agar	19-FEB-2010	TCCGGAGTTAGCGGCGGACGGGTGAGTAACACGTAGGTAACCTGCCCCTTAGACTGGGATAACTCCGGGAAACCGGAGCTAATACGGGATAATAAAGAGAATCGCCTGATTTTCTTTTGAAAGACGGCGTCTAGCTGTCACTAAGGGATGGACCTGCGGCGCATTAGCTAGTTGGTAAGGTAACGGCTTACCAAGGCGACGATGCGTAGCCGACCTGAGAGGGTGATCGGCCACACTGGGACTGAGACACGGCCCAGACTCCTACGGGAGGCAGCAGTAGGGAATCTTCCGCAATGGACGAAAGTCTGACGGAGCAACGCCGCGTGAGTGAGGAAGGCCTTCGGGTCGTAAAGCTCTGTTGTGAGGGAAGAACAAGTGCCGGCGTAACTACCGGCACCT…	63F 1389R
AmSamHD52i	GU903239	Wilson et al., 2012	Acropora corals				Vatia Bay, on the north side of the island of Tutuila (140°14′S, 1700°40′W), American Samoa,	mucus			Firmicutes	Bacilli	Bacillales	Planococcaceae	Planococcus	sp.	99	marine agar and Vibrio-specific thiosulphate citrate bile sucrose (TCBS) agar	19-FEB-2010	GGGGACTGCTCAGCGTTTAGCGGCGGACGGGTGAGTAACACGTGGGCAACCTGCCCTGCAGATCGGGATAACTCCGGGAAACCGGTGCTAATACCGAATAGTTTGAAGCCTCTCCTGAGGCTTCACGGAAAGACGGTTTCCGCTGTCACTGCAGGATGGGCCCGCGGCGCATTAACTAGTTGGTGGGGTAACGGCCCACCAAGGCCACGATGCGTAACCCACCTGAGAGGGTGACCGGCCACACTGGGACTGAAACACGGCCCAAACTCCTACCGGAGGCAGCAGTAGGGAATCTTCCGCAATGGACGCAAGTCTGACGGAACAACCCCCCGTGAGTGACGAAAGTTTTCGGATCGTAAAACTCTGTTGTGAGGGAAGAACACGTACCAACTAACTATT…	63F 1389R
AmSamHD52ii	GU903240	Wilson et al., 2012	Acropora corals				Vatia Bay, on the north side of the island of Tutuila (140°14′S, 1700°40′W), American Samoa,	mucus			Firmicutes	Bacilli	Bacillales	Staphylococcaceae	Jeotgalicoccus	sp.	100	marine agar and Vibrio-specific thiosulphate citrate bile sucrose (TCBS) agar	19-FEB-2010	GATCGAGCGGCGGACGGGTGAGTAACACGTAGGCAACCTACCCTTGAGATTGGGATAACTACCGGAAACGGTAGCTAATACCGGATACGACTTTTCCACATAAGTGGAATGGTTAAAAGGCGGATTTATCTGCCGCTCATGGATGGGCCTGCGGTGCATTAGCTAGTTGGTGAGGTAGTGGCTCACCAAGGCGACGATGCATAGCCGACCTGAGAGGGTGATCGGCCACACTGGGACTGAGACACGGCCCAGACTCCTACGGGAGGCAGCAGTAGGGAATCTTCCGCAATGGACGAAAGTCTGACGGAGCAACGCCGCGTGAGTGATGAAGGGTTTCGGCTCGTAAAACTCTGTTGTTAAGGAAGAACACTTGAGGTAGTAACTGGCCTTGAGATGACG…	63F 1389R
AmSamHD59	GU903246	Wilson et al., 2012	Acropora corals				Vatia Bay, on the north side of the island of Tutuila (140°14′S, 1700°40′W), American Samoa,	mucus			Firmicutes	Bacilli	Bacillales	Bacillaceae	Bacillus	sp.	99	marine agar and Vibrio-specific thiosulphate citrate bile sucrose (TCBS) agar	19-FEB-2010	CTTGCTCCGGAGTTAGCGGCGGACGGGTGAGTAACACGTAGGTAACCTGCCCCTTAGACTGGGATAACTCCGGGAAACCGGAGCTAATACGGGATAATAAAGAGAATCGCCTGATTTTCTTTTGAAAGACGGCGTCTAGCTGTCACTAAGGGATGGACCTGCGGCGCATTAGCTAGTTGGTAAGGTAACGGCTTACCAAGGCGACGATGCGTAGCCGACCTGAGAGGGTGATCGGCCACACTGGGACTGAGACACGGCCCAGACTCCTACGGGAGGCAGCAGTAGGGAATCTTCCGCAATGGACGAAAGTCTGACGGAGCAACGCCGCGTGAGTGAGGAAGGCCTTCGGGTCGTAAAGCTCTGTTGTGAGGGAAGAACAAGTGCCGGCGTAACTACCGG…	63F 1389R
AmSamHD81	GU903265	Wilson et al., 2012	Acropora corals				Vatia Bay, on the north side of the island of Tutuila (140°14′S, 1700°40′W), American Samoa,	mucus			Firmicutes	Bacilli	Bacillales	Bacillaceae	Bacillus	sp.	99	marine agar and Vibrio-specific thiosulphate citrate bile sucrose (TCBS) agar	19-FEB-2010	AGCTGCTCCGGAGTTAGCGGCGGACGGGTGAGTAACACGTAGGTAACCTGCCCCTTAGACTGGGATAACTCCGGGAAACCGGAGCTAATACGGGATAATAAAGAGAATCGCCTGATTTTCTTTTGAAAGACGGCGTCTAGCTGTCACTAAGGGATGGACCTGCGGCGCATTAGCTAGTTGGTAAGGTAACGGCTTACCAAGGCGACGATGCGTAGCCGACCTGAGAGGGTGATCGGCCACACTGGGACTGAGACACGGCCCAGACTCCTACGGGAGGCAGCAGTAGGGAATCTTCCGCAATGGACGAAAGTCTGACGGAGCAACGCCGCGTGAGTGAGGAAGGCCTTCGGGTCGTAAAGCTCTGTTGTGAGGGAAGAACAAGTGCCGGCGTAACTACCG…	63F 1389R
AmSamDD20	GU903210	Wilson et al., 2012	Acropora corals		diseased		Vatia Bay, on the north side of the island of Tutuila (140°14′S, 1700°40′W), American Samoa,	mucus			Firmicutes	Bacilli	Bacillales	Staphylococcaceae	Staphylococcus	sp.	99	marine agar and Vibrio-specific thiosulphate citrate bile sucrose (TCBS) agar	19-FEB-2010	AAGGAGCTTGCTCCTCTGACGTTAGCGGCGGACGGGTGAGTAACACGTGGGTAACCTACCTATAAGACTGGGATAACTTCGGGAAACCGGAGCTAATACCGGATAATATTTTGAACCGCATGGTTCAATAGTGAAAGATGGCTTTGCTATCACTTATAGATGGACCCGCGCCGTATTAGCTAGTTGGTAAGGTAACGGCTTACCAAGGCGACGATACGTAGCCGACCTGAGAGGGTGATCGGCCACACTGGAACTGAGACACGGTCCAGACTCCTACGGGAGGCAGCAGTAGGGAATCTTCCGCAATGGGCGAAAGCCTGACGGAGCAACGCCGCGTGAGTGATGAAGGTCTTCGGATCGTAAAACTCTGTTATTAGGGAAGAACATACGTGTAAGTAA…	63F 1389R
AmSamDD22i	GU903213	Wilson et al., 2012	Acropora corals		diseased		Vatia Bay, on the north side of the island of Tutuila (140°14′S, 1700°40′W), American Samoa,	mucus			Firmicutes	Bacilli	Bacillales	Bacillaceae	Oceanobacillus	sp.	100	marine agar and Vibrio-specific thiosulphate citrate bile sucrose (TCBS) agar	19-FEB-2010	CCCTTCGGGGGTGACGCTTGTGGAATGAGCGGCGGACGGGTGAGTAACACGTGGGCAACCTGCCTGTAAGACTGGGATAACCCCGGGAAACCGGGGCTAATACCGGATAATACTTTCTTTTGCATAAAGGAAAGTTGAAAGGCGGCTTCGGCTGTCACTTACAGATGGGCCCGCGGCGCATTAGCTAGTTGGTGAGGTAACGGCTCACCAAGGCGACGATGCGTAGCCGACCTGAGAGGGTGATCGGCCACACTGGGACTGAGACACGGCCCAGACTCCTACGGGAGGCAGCAGTAGGGAATCTTCCGCAATGGACGAAAGTCTGACGGAGCAACGCCGCGTGAGTGATGAAGGTTTTCGGATCGTAAAACTCTGTTGTTAGGGAAGAACAAGTTGGAT…	63F 1389R
AmSamDD31	GU903220	Wilson et al., 2012	Acropora corals		diseased		Vatia Bay, on the north side of the island of Tutuila (140°14′S, 1700°40′W), American Samoa,	mucus			Firmicutes	Bacilli	Bacillales	Incertae sedis	Exiguobacterium	sp.	99	marine agar and Vibrio-specific thiosulphate citrate bile sucrose (TCBS) agar	19-FEB-2010	TCGGGGGGACGTTGGCGGAATGAGCGGCGGACGGGTGAGTAACACGTAAAGAACCTGCCCTCAGGTCTGGGATAACCACGAGAAATCGGGGCTAATACCGGATGGGTCATCGGACCGCATGGTCCGAGGATGAAAGGCGCTTCGGCGTCGCCTGGGGATGGCTTTGCGGTGCATTAGCTAGTTGGTGGGGTAACGGCCCACCAAGGCGACGATGCATAGCCGACCTGAGAGGGTGATCGGCCACACTGGGACTGAGACACGGCCCAGACTCCTACGGGAGGCAGCAGTAGGGAATCTTCCACAATGGACGAAAGTCTGATGGAGCAACGCCGCGTGAACGATGAAGGCCCTCGGGTCGTAAAGTTCTGTTGTAAGGGAAGAACAAGTGCCGCAGGCAAT…	63F 1389R
AmSamDD33	GU903222	Wilson et al., 2012	Acropora corals		diseased		Vatia Bay, on the north side of the island of Tutuila (140°14′S, 1700°40′W), American Samoa,	mucus			Firmicutes	Bacilli	Bacillales	Bacillaceae	Bacillus	sp.	100	marine agar and Vibrio-specific thiosulphate citrate bile sucrose (TCBS) agar	19-FEB-2010	TCAGCGGCGGACGGGTGAGTAACACGTGGGCAACCTGCCTGTGAGACTGGGATAACTTCGGGAAACCGGAGCTAATACCGGATAATATAAGGAACCTCCTGGTTCTTTATTGAAAGATGGTTTCGGCTATCACTCACAGATGGGCCCGCGGCGCATTAGCTAGTTGGTGAGGTAACGGCTCACCAAGGCGACGATGCGTAGCCGACCTGAGAGGGTGATCGGCCACACTGGGACTGAGACACGGCCCAGACTCCTACGGGAGGCAGCAGTAGGGAATCTTCCACAATGGACGAAAGTCTGATGGAGCAACGCCGCGTGAGCGATGAAGGCCTTCGGGTCGTAAAGCTCTGTTGTTAGGGAAGAACAAGTGCGAGAGTAACTGCTCGCACCTTGACGGTA…	63F 1389R
AmSamDD41	GU903229	Wilson et al., 2012	Acropora corals		diseased		Vatia Bay, on the north side of the island of Tutuila (140°14′S, 1700°40′W), American Samoa,	mucus			Firmicutes	Bacilli	Bacillales	Bacillaceae	Oceanobacillus	sp.	100	marine agar and Vibrio-specific thiosulphate citrate bile sucrose (TCBS) agar	19-FEB-2010	CTGTAAGACTGGGATAACCCCGGGAAACCGGGGCTAATACCGGATAATACTTTCTTTTGCATAAAGGAAAGTTGAAAGGCGGCTTCGGCTGTCACTTACAGATGGGCCCGCGGCGCATTAGCTAGTTGGTGAGGTAACGGCTCACCAAGGCGACGATGCGTAGCCGACCTGAGAGGGTGATCGGCCACACTGGGACTGAGACACGGCCCAGACTCCTACGGGAGGCAGCAGTAGGGAATCTTCCGCAATGGACGAAAGTCTGACGGAGCAACGCCGCGTGAGTGATGAAGGTTTTCGGATCGTAAAACTCTGTTGTTAGG	63F 1389R
AmSamDD71	GU903257	Wilson et al., 2012	Acropora corals		diseased		Vatia Bay, on the north side of the island of Tutuila (140°14′S, 1700°40′W), American Samoa,	mucus			Firmicutes	Bacilli	Bacillales	Bacillaceae	Bacillus	sp.	99	marine agar and Vibrio-specific thiosulphate citrate bile sucrose (TCBS) agar	19-FEB-2010	CTGCTCCTGAGGTTAGCGGCGGACGGGTGAGTAACACGTGGGCAACCTGCCTGTAAGACTGGGATAACTCCGGGAAACCGGGGCTAATACCGGATAACCCGTTCCACCTCATGGTGGAGCGGTAAAAGATGGCCTCTGGCTATCACTTACAGATGGGCCCGCGGCGCATTAGCTAGTTGGTAAGGTAACGGCTTACCAAGGCGACGATGCGTAGCCGACCTGAGAGGGTGATCGGCCACACTGGGACTGAGACACGGCCCAGACTCCTACGGGAGGCAGCAGTAGGGAATCTTCCGCAATGGACGAAAGTCT	63F 1389R
AmSamDD75	GU903261	Wilson et al., 2012	Acropora corals		diseased		Vatia Bay, on the north side of the island of Tutuila (140°14′S, 1700°40′W), American Samoa,	mucus			Firmicutes	Bacilli	Bacillales	Staphylococcaceae	Staphylococcus	sp.	100	marine agar and Vibrio-specific thiosulphate citrate bile sucrose (TCBS) agar	19-FEB-2010	TCTTTGACGTTAGCGGCGGACGGGTGAGTAACACGTGGATAACCTACCTATAAGACTGGGATAACTTCGGGAAACCGGAGCTAATACCGGATAACATATTGAACCGCATGGTTCAATAGTGAAAGGCGGCTTTGCTGTCACTTATAGATGGATCCGCGCCGTATTAGCTAGTTGGTAAGGTGACGGCTTACCAAGGCAACGATACGTAGCCGACCTGAGAGGGTGATCGGCCACACTGGAACTGAGACACGGTCCAGACTCCTACGGGAGGCAGCAGTAGGGAATCTTCCGCAATGGGCGAAAGCCTGACGGAGCAACGCCGCGTGAGTGATGAAGGTCTTCGGATCGTAAAACTCTGTTATCAGGGAAGAACAAATGTGTAAGTAACTGTGCACATCT…	63F 1389R
AmSamDD80	GU903264	Wilson et al., 2012	Acropora corals		diseased		Vatia Bay, on the north side of the island of Tutuila (140°14′S, 1700°40′W), American Samoa,	mucus			Firmicutes	Bacilli	Bacillales	Bacillaceae	Bacillus	sp.	99	marine agar and Vibrio-specific thiosulphate citrate bile sucrose (TCBS) agar	19-FEB-2010	TGCTCCGGAGTTAGCGGCGGACGGGTGAGTAACACGTAGGTAACCTGCCCCTTAGACTGGGATAACTCCGGGAAACCGGAGCTAATACGGGATAATAAAGAGAATCGCCTGATTTTCTTTTGAAAGACGGCGTCTAGCTGTCACTAAGGGATGGACCTGCGGCGCATTAGCTAGTTGGTAAGGTAACGGCTTACCAAGGCGACGATGCGTAGCCGACCTGAGAGGGTGATCGGCCACACTGGGACTGAGACACGGCCCAGACTCCTACGGGAGGCAGCAGTAGGGAATCTTCCGCAATGGACGAAAGTCTGACGGAGCAACGCCGCGTGAGTGAGGAAGGCCTTCGGGTCGTAAAGCTCTGTTGTGAGGGAAGAACAAGTGCCGGCGTAACTACCGGCA…	63F 1389R
R1ma	DQ530511	Ritchie (2006)	Acropora palmata				Looe Key Reef, in the Florida Keys (24° 32.76’ N, 81° 24.21’ W and 24° 32.75’ N, 81° 24.35’ W)	mucus	24	https://www.int-res.com/abstracts/meps/v322/p1-14/	Firmicutes	Bacilli	Bacillales	Bacillaceae	Bacillus	sp.	100	glycerol artificial seawater agar (GASWA)	19-APR-2006	AACCGAAGCTAATACCGGATAGGATCTTCTCCTTCATGGGAGATGATTGAAAGATGGTTTCGGCTATCACTTACAGATGGGCCCGCGGTGCATTAGCTAGTTGGTGAGGTAACGGCTCACCAAGGCAACGATGCATAGCCGACCTGAGAGGGTGATCGGCCACACTGGGACTGAGACACGGCCCAGACTCCTACGGGAGGCAGCAGTAGGGAATCTTCCGCAATGGACGAAAGTCTGACGGAGCAACGCCGCGTGAGTGATGAAGGCTTTCGGGTCGTAAAACTCTGTTGTTAGGGAAGAACAAGTACAAGAGTAACTGCTTGTACCTTGACGGTACCTAACCAGAAAGCCACGGCTAACTACGTGCCAGCAGCCGCGGTAATACGTAGGTGGCAAGCG…	R1n U2	https://www.int-res.com/abstracts/meps/v322/p1-14/
R1t9	DQ530521	Ritchie (2006)	Acropora palmata				Looe Key Reef, in the Florida Keys (24° 32.76’ N, 81° 24.21’ W and 24° 32.75’ N, 81° 24.35’ W)	mucus	24		Firmicutes	Bacilli	Bacillales	Incertae sedis	Exiguobacterium	sp.	100	glycerol artificial seawater agar (GASWA)	19-APR-2006	ATACCGGATGGGTCATCGGACCGCATGGTCCGAGGATGAAAGGCGCTTCGGCGTCGCCTGGGGATGGCTTTGCGGTGCATTAGCTAGTTGGTGGGGTAATGGCCCACCAAGGCGACGATGCATAGCCGACCTGAGAGGGTGATCGGCCACACTGGGACTGAGACACGGCCCAGACTCCTACGGGAGGCAGCAGTAGGGAATCTTCCACAATGGACGAAAGTCTGATGGAGCAACGCCGCGTGAACGATGAAGGCCTTCGGGTCGTAAAGTTCTGTTGTAAGGGAAGAACAAGTGCCGCAGGCAATGGCGGCACCTTGACGGTACCTTGCGAGAAAGCCACGGCTAACTACGTGCCAGCAGCCGCGGTAATACGTAGGTGGCAAGCGTTGTCCGGAATTA…	R1n U2
SCSAAB0001	JQ647873	Zhang et al., 2012	Antipathes dichotoma		healthy		Sanya coral reef conservation (18°11′N, 109°25′E) in the South China Sea	whole fragment		https://academic.oup.com/femsle/article/336/2/122/539000	Firmicutes	Bacilli	Bacillales	Bacillaceae	Bacillus	sp.	99	Custom media, see reference for details	07-FEB-2012	CGGCAATGCGCTGCTATACATGCAGTCGAGCGGACAGAAGGGAGCTTGCTCCCGGATGTTAGCGGCGGACGGGTGAGTAACACGTGGGTAACCTGCCTGTAAGACTGGGATAACTCCGGGAAACCGGAGCTAATACCGGATAGTTCCTTGAACCGCATGGTTCAAGGATGAAAGACGGTTTCGGCTGTCACTTACAGATGGACCCGCGGCGCATTAGCTAGTTGGTGAGGTAACGGCTCACCAAGGCGACGATGCGTAGCCGACCTGAGAGGGTGATCGGCCACACTGGGACTGAGACACGGCCCAGACTCCTACGGGAGGCAGCAGTAGGGAATCTTCCGCAATGGACGAAAGTCTGACGGAGCAACGCCGCGTGAGTGATGAAGGTTTTCGGATCGT…	27F 1525R	https://academic.oup.com/femsle/article/336/2/122/539000
SCSAAB0007	JQ647874	Zhang et al., 2012	Antipathes dichotoma		healthy		Sanya coral reef conservation (18°11′N, 109°25′E) in the South China Sea	whole fragment			Firmicutes	Bacilli	Bacillales	Bacillaceae	Bacillus	sp.	99	Custom media, see reference for details	07-FEB-2012	GCAAGTGCGGGTGCTATACATGCAGTCGAGCGGACAGATGGGAGCTTGCTCCCTGATGTTAGCGGCGGACGGGTGAGTAACACGTGGGTAACCTGCCTGTAAGACTGGGATAACTCCGGGAAACCGGGGCTAATACCGGATGGTTGTCTGAACCGCATGGTTCAGACATAAAAGGTGGCTTCGGCTACCACTTACAGATGGACCCGCGGCGCATTAGCTAGTTGGTGAGGTAACGGCTCACCAAGGCGACGATGCGTAGCCGACCTGAGAGGGTGATCGGCCACACTGGGACTGAGACACGGCCCAGACTCCTACGGGAGGCAGCAGTAGGGAATCTTCCGCAATGGACGAAAGTCTGACGGAGCAACGCCGCGTGAGTGATGAAGGTTTTCGGATCGT…	27F 1525R
SCSAAB0009	JQ647875	Zhang et al., 2012	Antipathes dichotoma		healthy		Sanya coral reef conservation (18°11′N, 109°25′E) in the South China Sea	whole fragment			Firmicutes	Bacilli	Bacillales	Bacillaceae	Bacillus	sp.	99	Custom media, see reference for details	07-FEB-2012	GGCAAATGGCGCTGCTATACATGCAGTCGAGCGGATCAAGGGAGCTTGCTCCCTGAGATCAGCGGCGGACGGGTGAGTAACACGTGGGTAACCTGCCTGTAAGACTGGGATAACTCCGGGAAACCGGGGCTAATACCGGATAACTCAGTTCCTCGCATGAGGAACTGTTGAAAGGTGGCTTTTCGCTACCACTTACAGATGGACCCGCGGCGCATTAGCTAGTTGGTGAGGTAACGGCTCACCAAGGCGACGATGCGTAGCCGACCTGAGAGGGTGATCGGCCACACTGGGACTGAGACACGGCCCAGACTCCTACGGGAGGCAGCAGTAGGGAATCTTCCGCAATGGACGAAAGTCTGACGGAGCAACGCCGCGTGAGTGAAGAAGGTTTTCGGATCG…	27F 1525R
SCSAAB0010	JQ647876	Zhang et al., 2012	Antipathes dichotoma		healthy		Sanya coral reef conservation (18°11′N, 109°25′E) in the South China Sea	whole fragment			Firmicutes	Bacilli	Bacillales	Bacillaceae	Bacillus	sp.	99	Custom media, see reference for details	07-FEB-2012	CGGCAATGGCGCTGCTATACATGCAGTCGAGCGACTGATTAGAAGCTTGCTTCTATGACGTTAGCGGCGGACGGGTGAGTAACACGTGGGCAACCTGCCTGTAAGACTGGGATAACTTCGGGAAACCGAAGCTAATACCGGATAGGATCTTCTCCTTCATGGGAGATGATTGAAAGATGGTTTCGGCTATCACTTACAGATGGGCCCGCGGTGCATTAGCTAGTTGGTGAGGTAACGGCTCACCAAGGCAACGATGCATAGCCGACCTGAGAGGGTGATCGGCCACACTGGGACTGAGACACGGCCCAGACTCCTACGGGAGGCAGCAGTAGGGAATCTTCCGCAATGGACGAAAGTCTGACGGAGCAACGCCGCGTGAGTGATGAAGGCTTTCGGGTC…	27F 1525R
SCSAAB0011	JQ647877	Zhang et al., 2012	Antipathes dichotoma		healthy		Sanya coral reef conservation (18°11′N, 109°25′E) in the South China Sea	whole fragment			Firmicutes	Bacilli	Bacillales	Bacillaceae	Bacillus	sp.	99	Custom media, see reference for details	07-FEB-2012	GGCAGGGCGCTGCTATAATGCAGTCGAGCGACTGATTAGAAGCTTGCTTCTATGACGTTAGCGGCGGACGGGTGAGTAACACGTGGGCAACCTGCCTGTAAGACTGGGATAACTCCGGGAAACCGGAGCTAATACCGGATAACATTTTCTCTTGCATAAGAGAAAATTGAAAGATGGTTTCGGCTATCACTTACAGATGGGCCCGCGGTGCATTAGCTAGTTGGTGAGGTAACGGCTCACCAAGGCAACGATGCATAGCCGACCTGAGAGGGTGATCGGCCACACTGGGACTGAAACACGGCCCAAACTCCTACGGGAGGCAGCAGTAGGGAATCTTCCGCAATGGACGAAAGTCTGACGGAGCAACGCCGCGTGAGTGATGAAGGCTTTCGGGTCGTA…	27F 1525R
SCSAAB0013	JQ647878	Zhang et al., 2012	Antipathes dichotoma		healthy		Sanya coral reef conservation (18°11′N, 109°25′E) in the South China Sea	whole fragment			Firmicutes	Bacilli	Bacillales	Bacillaceae	Bacillus	sp.	99	Custom media, see reference for details	07-FEB-2012	GGCAGTGCGGGGTGCTATACATGCAGTCGAGCGATCTGAGGGAGCTTGCTCCCAAATGGATTAGCGGCGGACGGGTGAGTAACACGTGGGTAACCTGCCTGTAAGATTGGGATAACTCCGGGAAACCGGAGCTAATACCGGATAACATTTCGAACCGCATGGTTCGAAATTGAAAGGTGGCTTTTGCTATCACTTACAGATGGACCCGCGGCGCATTAGCTAGTTGGTGAGGTAACGGCTCACCAAGGCGACGATGCGTAGCCGACCTGAGAGGGTGATCGGCCACACTGGGACTGAGACACGGCCCAGACTCCTACGGGAGGCAGCAGTAGGGAATCTTCCGCAATGGACGAAAGTCTGACGGAGCAACGCCGCGTGAACGATGAAGGCCTTCGGGTC…	27F 1525R
SCSAAB0014	JQ647879	Zhang et al., 2012	Antipathes dichotoma		healthy		Sanya coral reef conservation (18°11′N, 109°25′E) in the South China Sea	whole fragment			Firmicutes	Bacilli	Bacillales	Bacillaceae	Bacillus	sp.	99	Custom media, see reference for details	07-FEB-2012	AAGGGGTGCGGGTGCTATAATGCAGTCGAGCGGACAGAAGGGAGCTTGCTCCCGGATGTTAGCGGCGGACGGGTGAGTAACACGTGGGTAACCTGCCTGTAAGACTGGGATAACTCCGGGAAACCGGAGCTAATACCGGATAGTTCCTTGAACCGCATGGTTCAAGGATGAAAGACGGTTTCGGCTGTCACTTACAGATGGACCCGCGGCGCATTAGCTAGTTGGTGAGGTAACGGCTCACCAAGGCGACGATGCGTAGCCGACCTGAGAGGGTGATCGGCCACACTGGGACTGAGACACGGCCCAGACTCCTACGGGAGGCAGCAGTAGGGAATCTTCCGCAATGGACGAAAGTCTGACGGAGCAACGCCGCGTGAGTGATGAAGGTTTTCGGATCGT…	27F 1525R
SCSAAB0015	JQ647880	Zhang et al., 2012	Antipathes dichotoma		healthy		Sanya coral reef conservation (18°11′N, 109°25′E) in the South China Sea	whole fragment			Firmicutes	Bacilli	Bacillales	Bacillaceae	Bacillus	sp.	99	Custom media, see reference for details	07-FEB-2012	GGCAGTGCGGCTGCTATACATGCAGTCGAGCGGACAGATGGGAGCTTGCTCCCTGATGTTAGCGGCGGACGGGTGAGTAACACGTGGGTAACCTGCCTGTAAGACTGGGATAACTCCGGGAAACCGGGGCTAATACCGGATGGTTGTCTGAACCGCATGGTTCAGACATAAAAGGTGGCTTCGGCTACCACTTACAGATGGACCCGCGGCGCATTAGCTAGTTGGTGAGGTAACGGCTCACCAAGGCGACGATGCGTAGCCGACCTGAGAGGGTGATCGGCCACACTGGGACTGAGACACGGCCCAGACTCCTACGGGAGGCAGCAGTAGGGAATCTTCCGCAATGGACGAAAGTCTGACGGAGCAACGCCGCGTGAGTGATGAAGGTTTTCGGATCGT…	27F 1525R
SCSAAB0017	JQ647881	Zhang et al., 2012	Antipathes dichotoma		healthy		Sanya coral reef conservation (18°11′N, 109°25′E) in the South China Sea	whole fragment			Firmicutes	Bacilli	Bacillales	Bacillaceae	Thalassobacillus	sp.	99	Custom media, see reference for details	07-FEB-2012	CAGGGGGTGCTATACATGCAGTCGAGCGCAGGAAGCAAGCTGATCCCCTTCGGGGGTGACGCTTGTGGAATGAGCGGCGGACGGGTGAGTAACACGTGGGCAACCTGCCTGTAAGACTGGGATAACCCCGGGAAACCGGGGCTAATACCGGGTAATACCTGACTCCGCATGGAGTCGGGTTGAAAGATGGCTTCTTGCTATCACTTACAGATGGGCCCGCGGCGCATTAGCTAGTTGGTGAGGTAACGGCTCACCAAGGCAACGATGCGTAGCCGACCTGAGAGGGTGATCGGCCACACTGGGACTGAGACACGGCCCAGACTCCTACGGGAGGCAGCAGTAGGGAATCTTCCGCAATGGACGAAAGTCTGACGGAGCAACGCCGCGTGAACGATGAAG…	27F 1525R
SCSAAB0022	JQ647886	Zhang et al., 2012	Antipathes dichotoma		healthy		Sanya coral reef conservation (18°11′N, 109°25′E) in the South China Sea	whole fragment			Firmicutes	Bacilli	Bacillales	Paenibacillaceae	Paenibacillus	sp.	99	Custom media, see reference for details	07-FEB-2012	CGGCAGGGCGGCTGCTATACATGCAGTCGAGCGGACTTTACCTTCGGGTAAAGTTAGCGGCGGACGGGTGAGTAACACGTGGGTAACCTGCCCATAAGACCGGGATAACATTCGGAAACGAATGCTAATACCGGATACGCGAAACGGTCGCATGGCCGAATCGGGAAAGGCGGAGCAATCTGCCACTTATGGATGGACCCGCGGCGCATTAGCTAGTTGGTGGGGTAACGGCTCACCAAGGCGACGATGCGTAGCCGACCTGAGAGGGTGATCGGCCACACTGGGACTGAGACACGGCCCAGACTCCTACGGGAGGCAGCAGTAGGGAATCTTCCGCAATGGACGAAAGTCTGACGGAGCAACGCCGCGTGAGTGATGAAGGTTTTCGGATCGTAAAGC…	27F 1525R
SCSAAB0024	JQ647888	Zhang et al., 2012	Antipathes dichotoma		healthy		Sanya coral reef conservation (18°11′N, 109°25′E) in the South China Sea	whole fragment			Firmicutes	Bacilli	Bacillales	Staphylococcaceae	Staphylococcus	sp.	99	Custom media, see reference for details	07-FEB-2012	TAGCAAGGGCGGCGTGCTATACATGCAGTCGAGCGACGGATAAGGAGCTTGCTCCTTTGAAGTTAGCGGCGGACGGGTGAGTAACACGTGGGTAACCTACCTATAAGACTGGAATAACTTCGGGAAACCGGAGCTAATGCCGGATAACATTTGGAACCGCATGGTTCTAAAGTAAAAGATGGTTTTGCTATCACTTATAGATGGACCCGCGCCGTATTAGCTAGTTGGTAAGGTAACGGCTTACCAAGGCAACGATACGTAGCCGACCTGAGAGGGTGATCGGCCACACTGGAACTGAGACACGGTCCAGACTCCTACGGGAGGCAGCAGTAGGGAATCTTCCGCAATGGACGAAAGTCTGACGGAGCAACGCCGCGTGAGTGATGAAGGTTTTCGGAT…	27F 1525R
PC8	EU333116	Seemann et al., 2009	Palythoa caribaeorum				Curaçao, Netherland Antilles,				Firmicutes	Bacilli	Bacillales	Bacillaceae	Bacillus	sp.	99	Blood agar	06-DEC-2007	ACATGCGAGTCGAGTCGAATGGATTAAGAGCTTGCTCTTATGAAGTTAGCGGCGGACGGGTGAGTAACACGTGGGTAACCTGCCCATAAGACTGGGATAACTCCGGGAAACCGGGGCTAATACCGGATAACATTTTGAACCGCATGGTTCGAAATTGAAAGGCGGCTTCGGCTGTCACTTATGGATGGACCCGCGTCGCATTAGCTAGTTGGTGAGGTAACGGCTCACCAAGGCAACGATGCGTAGCCGACCTGAGAGGGTGATCGGCCACACTGGGACTGAGACACGGCCCAGACTCCTACGGGAGGCAGCAGTAGGGAATCTTCCGCAATGGACGAAAGTCTGACGGAGCAACGCCGCGTGAGTGATGAAGGCTTTCGGGTCGTAAAACTCTGTTGT…	(27f 1492r
Pc10	EU333117	Seemann et al., 2009	Palythoa caribaeorum				Curaçao, Netherland Antilles,				Firmicutes	Bacilli	Bacillales	Bacillaceae	Bacillus	sp.	99	Blood agar	06-DEC-2007	GGNTGAAGCTGGACGGCGTGCCTAATACATGCAAGTCGAGCGAATGGGATTAAGAGCTTGCTCTTATGAAGTTAGCGGCGGACGGGTGAGTAACACGTGGGTAACCTGCCCATAAGACTGGGATAACTCCGGGAAACCGGGGCTAATACCGGATAACATTTTGAACCGCATGGTTCGAAATTGAAAGGCGGCTTCGGCTGTCACTTATGGATGGACCCGCGTCGCATTAGCTAGTTGGTGAGGTAACGGCTCACCAAGGCAACGATGCGTAGCCGACCTGAGAGGGTGATCGGCCACACTGGGACTGAGACACGGCCCAGACTCCTACGGGAGGCAGCAGTAGGGAATCTTCCGCAATGGACGAAAGTCTGACGGAGCAACGCCGCGTGAGTGATGAAG…	(27f 1492r
Pc14	EU333118	Seemann et al., 2009	Palythoa caribaeorum				Curaçao, Netherland Antilles,				Firmicutes	Bacilli	Bacillales	Bacillaceae	Bacillus	sp.	99	Blood agar	06-DEC-2007	AGTCGAGACGAATGGGATTAAGAGCTTGCTCTTATGAAGTTAGCGGCGGACGGGTGAGTAACACGTGGGTAACCTGCCCATAAGACTGGGATAACTCCGGGAAACCGGGGCTAATACCGGATAACATTTTGAACCGCATGGTTCGAAATTGAAAGGCGGCTTCGGCTGTCACTTATGGATGGACCCGCGTCGCATTAGCTAGTTGGTGAGGTAACGGCTCACCAAGGCAACGATGCGTAGCCGACCTGAGAGGGTGATCGGCCACACTGGGACTGAGACACGGCCCAGACTCCTACGGGAGGCAGCAGTAGGGAATCTTCCGCAATGGACGAAAGTCTGACGGAGCAACGCCGCGTGAGTGATGAAGGCTTTCGGGTCGTAAAACTCTGTTGTTAGGGA…	(27f 1492r
Pc24	EU333119	Seemann et al., 2009	Palythoa caribaeorum				Curaçao, Netherland Antilles,				Firmicutes	Bacilli	Bacillales	Staphylococcaceae	Staphylococcus	sp.	99	Blood agar	06-DEC-2007	TGCCTAATACATGCAAGTCGAGCGAACAGACGAGGAGCTTGCTCCTTTGACGTTAGCGGCGGACGGGTGAGTAACACGTGGGTAACCTACCTATAAGACTGGGATAACTTCGGGAAACCGGAGCTAATACCGGATAATATTTCGAACCGCATGGTTCGATAGTGAAAGATGGCTCTGCTATCACTTATAGATGGACCTGCGCCGTATTAGCTAGTTGGTAAGGTAACGGCTTACCAAGGCAACGATACGTAGCCGACCTGAGAGGGTGATCGGCCACACTGGAACTGAGACACGGTCCAGACTCCTACGGGAGGCAGCAGTAGGGAATCTTCCGCAATGGGCGAAAGCCTGACGGAGCAACGCCGCGTGAGTGATGAAGGTCTTCGGATCGTAAAACTC…	(27f 1492r
Pc26	EU333120	Seemann et al., 2009	Palythoa caribaeorum				Curaçao, Netherland Antilles,				Firmicutes	Bacilli	Bacillales	Bacillaceae	Bacillus	sp.	99	Blood agar	06-DEC-2007	CTAATACATGCAAGTCGAGCGAATGGATTAAGAGCTTGCTCTTATGAAGTTAGCGGCGGACGGGTGAGTAACACGTGGGTAACCTGCCCATAAGACTGGGATAACTCCGGGAAACCGGGGCTAATACCGGATAACATTTTGAACCGCATGGTTCGAAATTGAAAGGCGGCTTCGGCTGTCACTTATGGATGGACCCGCGTCGCATTAGCTAGTTGGTGAGGTAACGGCTCACCAAGGCAACGATGCGTAGCCGACCTGAGAGGGTGATCGGCCACACTGGGACTGAGACACGGCCCAGACTCCTACGGGAGGCAGCAGTAGGGAATCTTCCGCAATGGACGAAAGTCTGACGGAGCAACGCCGCGTGAGTGATGAAGGCTTTCGGGTCGTAAAACTCTG…	(27f 1492r
Pc28	EU333121	Seemann et al., 2009	Palythoa caribaeorum				Curaçao, Netherland Antilles,				Firmicutes	Bacilli	Bacillales	Bacillaceae	Bacillus	sp.	99	Blood agar	06-DEC-2007	CGTGCCTAATACATGCAAGTGCGAGCGAATGGATTAAGAGCTTGCTCTTATGAAGTTAGCGGCGGACGGGTGAGTAACACGTGGGTAACCTGCCCATAAGACTGGGATAACTCCGGGAAACCGGGGCTAATACCGGATAACATTTTGAACCGCATGGTTCGAAATTGAAAGGCGGCTTCGGCTGTCACTTATGGATGGACCCGCGTCGCATTAGCTAGTTGGTGAGGTAACGGCTCACCAAGGCAACGATGCGTAGCCGACCTGAGAGGGTGATCGGCCACACTGGGACTGAGACACGGCCCAGACTCCTACGGGAGGCAGCAGTAGGGAATCTTCCGCAATGGACGAAAGTCTGACGGAGCAACGCCGCGTGAGTGATGAAGGCTTTCGGGTCGTAAA…	(27f 1492r
Pc44	EU333122	Seemann et al., 2009	Palythoa caribaeorum				Curaçao, Netherland Antilles,				Firmicutes	Bacilli	Bacillales	Bacillaceae	Bacillus	sp.	99	Blood agar	06-DEC-2007	GCCTAATACATGCAAGTGCGAGCGAATGGATTAAGAGCTTGCTCTTATGAAGTTAGCGGCGGACGGGTGAGTAACACGTGGGTAACCTGCCCATAAGACTGGGATAACTCCGGGAAACCGGGGCTAATACCGGATAACATTTTGAACCGCATGGTTCGAAATTGAAAGGCGGCTTCGGCTGTCACTTATGGATGGACCCGCGTCGCATTAGCTAGTTGGTGAGGTAACGGCTCACCAAGGCAACGATGCGTAGCCGACCTGAGAGGGTGATCGGCCACACTGGGACTGAGACACGGCCCAGACTCCTACGGGAGGCAGCAGTAGGGAATCTTCCGCAATGGACGAAAGTCTGACGGAGCAACGCCGCGTGAGTGATGAAGGCTTTCGGGTCGTAAAACT…	(27f 1492r
Pc53	EU333124	Seemann et al., 2009	Palythoa caribaeorum				Curaçao, Netherland Antilles,				Firmicutes	Bacilli	Bacillales	Bacillaceae	Bacillus	sp.	99	Blood agar	06-DEC-2007	TAAGAGCTTGCTCTTATGAAGTTAGCGGCGGACGGGTGAGTAACACGTGGGTAACCTGCCCATAAGACTGGGATAACTCCGGGAAACCGGGGCTAATACCGGATAACATTTTGAACCGCATGGTTCGAAATTGAAAGGCGGCTTCGGCTGTCACTTATGGATGGACCCGCGTCGCATTAGCTAGTTGGTGAGGTAACGGCTCACCAAGGCAACGATGCGTAGCCGACCTGAGAGGGTGATCGGCCACACTGGGACTGAGACACGGCCCAGACTCCTACGGGAGGCAGCAGTAGGGAATCTTCCGCAATGGACGAAAGTCTGACGGAGCAACGCCGCGTGAGTGATGAAGGCTTTCGGGTCGTAAAACTCTGTTGTTAGGGAAGAACAAGTGCTAGTTGA…	(27f 1492r
Pc55	EU333125	Seemann et al., 2009	Palythoa caribaeorum				Curaçao, Netherland Antilles,				Firmicutes	Bacilli	Bacillales	Bacillaceae	Bacillus	sp.	99	Blood agar	06-DEC-2007	CGAGTCGAATGGATTAAGAGCTTGCTCTTATGAAGTTAGCGGCGGACGGGTGAGTAACACGTGGGTAACCTGCCCATAAGACTGGGATAACTCCGGGAAACCGGGGCTAATACCGGATAACATTTTGAACCGCATGGTTCGAAATTGAAAGGCGGCTTCGGCTGTCACTTATGGATGGACCCGCGTCGCATTAGCTAGTTGGTGAGGTAACGGCTCACCAAGGCAACGATGCGTAGCCGACCTGAGAGGGTGATCGGCCACACTGGGACTGAGACACGGCCCAGACTCCTACGGGAGGCAGCAGTAGGGAATCTTCCGCAATGGACGAAAGTCTGACGGAGCAACGCCGCGTGAGTGATGAAGGCTTTCGGGTCGTAAAACTCTGTTGTTAGGGAAGAA…	(27f 1492r
Pc56	EU333126	Seemann et al., 2009	Palythoa caribaeorum				Curaçao, Netherland Antilles,				Firmicutes	Bacilli	Bacillales	Bacillaceae	Bacillus	sp.	99	Blood agar	06-DEC-2007	ATCGAGTCGAATGGATTAAGAGCTTGCTCTTATGAAGTTAGCGGCGGACGGGTGAGTAACACGTGGGTAACCTGCCCATAAGACTGGGATAACTCCGGGAAACCGGGGCTAATACCGGATAACATTTTGAACCGCATGGTTCGAAATTGAAAGGCGGCTTCGGCTGTCACTTATGGATGGACCCGCGTCGCATTAGCTAGTTGGTGAGGTAACGGCTCACCAAGGCAACGATGCGTAGCCGACCTGAGAGGGTGATCGGCCACACTGGGACTGAGACACGGCCCAGACTCCTACGGGAGGCAGCAGTAGGGAATCTTCCGCAATGGACGAAAGTCTGACGGAGCAACGCCGCGTGAGTGATGAAGGCTTTCGGGTCGTAAAACTCTGTTGTTAGGGAAG…	(27f 1492r
Pc58	EU333127	Seemann et al., 2009	Palythoa caribaeorum				Curaçao, Netherland Antilles,				Firmicutes	Bacilli	Bacillales	Bacillaceae	Bacillus	sp.	99	Blood agar	06-DEC-2007	CGAATGGATTAAGAGCTTGCTCTTATGAAGTTAGCGGCGGACGGGTGAGTAACACGTGGGTAACCTGCCCATAAGACTGGGATAACTCCGGGAAACCGGGGCTAATACCGGATAACATTTTGAACCGCATGGTTCGAAATTGAAAGGCGGCTTCGGCTGTCACTTATGGATGGACCCGCGTCGCATTAGCTAGTTGGTGAGGTAACGGCTCACCAAGGCAACGATGCGTAGCCGACCTGAGAGGGTGATCGGCCACACTGGGACTGAGACACGGCCCAGACTCCTACGGGAGGCAGCAGTAGGGAATCTTCCGCAATGGACGAAAGTCTGACGGAGCAACGCCGCGTGAGTGATGAAGGCTTTCGGGTCGTAAAACTCTGTTGTTAGGGAAGAACAAGT…	(27f 1492r
Pc60	EU333128	Seemann et al., 2009	Palythoa caribaeorum				Curaçao, Netherland Antilles,				Firmicutes	Bacilli	Bacillales	Bacillaceae	Bacillus	sp.	99	Blood agar	06-DEC-2007	CGGCGTGCCTAATACATGCAAGTACGAAGCCGAATGGATTAAGAGCTTGCTCTTATGAAGTTAGCGGCGGACGGGTGAGTAACACGTGGGTAACCTGCCCATAAGACTGGGATAACTCCGGGAAACCGGGGCTAATACCGGATAACATTTTGAACCGCATGGTTCGAAATTGAAAGGCGGCTTCGGCTGTCACTTATGGATGGACCCGCGTCGCATTAGCTAGTTGGTGAGGTAACGGCTCACCAAGGCAACGATGCGTAGCCGACCTGAGAGGGTGATCGGCCACACTGGGACTGAGACACGGCCCAGACTCCTACGGGAGGCAGCAGTAGGGAATCTTCCGCAATGGACGAAAGTCTGACGGAGCAACGCCGCGTGAGTGATGAAGGCTTTCGGGTC…	(27f 1492r
Pc78	EU333130	Seemann et al., 2009	Palythoa caribaeorum				Curaçao, Netherland Antilles,				Firmicutes	Bacilli	Bacillales	Bacillaceae	Bacillus	sp.	99	Blood agar	06-DEC-2007	ACATGCCAAGTGCGAGNCGAATGGGATTAAGAGCTTGCTCTTATGAAGTTAGCGGCGGACGGGTGAGTAACACGTGGGTAACCTGCCCATAAGACTGGGATAACTCCGGGAAACCGGGGCTAATACCGGATAACATTTTGAACCGCATGGTTCGAAATTGAAAGGCGGCTTCGGCTGTCACTTATGGATGGACCCGCGTCGCATTAGCTAGTTGGTGAGGTAACGGCTCACCAAGGCAACGATGCGTAGCCGACCTGAGAGGGTGATCGGCCACACTGGGACTGAGACACGGCCCAGACTCCTACGGGAGGCAGCAGTAGGGAATCTTCCGCAATGGACGAAAGTCTGACGGAGCAACGCCGCGTGAGTGATGAAGGCTTTCGGGTCGTAAAACTCTGT…	(27f 1492r
Pc80	EU333131	Seemann et al., 2009	Palythoa caribaeorum				Curaçao, Netherland Antilles,				Firmicutes	Bacilli	Bacillales	Bacillaceae	Bacillus	sp.	99	Blood agar	06-DEC-2007	GAGTTTGATCCTGGCTCAGGATGAACGCTGGCGGCGTGCCTAATACATGCAAGTCGAGCGAATGGATTAAGAGCTTGCTCTTATGAAGTTAGCGGCGGACGGGTGAGTAACACGTGGGTAACCTGCCCATAAGACTGGGATAACTCCGGGAAACCGGGGCTAATACCGGATAACATTTTGAACCGCATGGTTCGAAATTGAAAGGCGGCTTCGGCTGTCACTTATGGATGGACCCGCGTCGCATTAGCTAGTTGGTGAGGTAACGGCTCACCAAGGCAACGATGCGTAGCCGACCTGAGAGGGTGATCGGCCACACTGGGACTGAGACACGGCCCAGACTCCTACGGGAGGCAGCAGTAGGGAATCTTCCGCAATGGACGAAAGTCTGACGGAGCAACG…	(27f 1492r
Pc94	EU333132	Seemann et al., 2009	Palythoa caribaeorum				Curaçao, Netherland Antilles,				Firmicutes	Bacilli	Bacillales	Bacillaceae	Bacillus	sp.	99	Blood agar	06-DEC-2007	TAATACATGCCAAGTGCGAGNCGAATGGGATTAAGAGCTTGCTCTTATGAAGTTAGCGGCGGACGGGTGAGTAACACGTGGGTAACCTGCCCATAAGACTGGGATAACTCCGGGAAACCGGGGCTAATACCGGATAACATTTTGAACCGCATGGTTCGAAATTGAAAGGCGGCTTCGGCTGTCACTTATGGATGGACCCGCGTCGCATTAGCTAGTTGGTGAGGTAACGGCTCACCAAGGCAACGATGCGTAGCCGACCTGAGAGGGTGATCGGCCACACTGGGACTGAGACACGGCCCAGACTCCTACGGGAGGCAGCAGTAGGGAATCTTCCGCAATGGACGAAAGTCTGACGGAGCAACGCCGCGTGAGTGATGAAGGCTTTCGGGTCGTAAAACT…	(27f 1492r
Pc119	EU333134	Seemann et al., 2009	Palythoa caribaeorum				Curaçao, Netherland Antilles,				Firmicutes	Bacilli	Bacillales	Bacillaceae	Bacillus	sp.	99	Blood agar	06-DEC-2007	GAGTTTGATCCTGGCTCAGGATGAACGCTGGCGGCGTGCCTAATACATGCAAGTCGAGCGAATGGATTAAGAGCTTGCTCTTATGAAGTTAGCGGCGGACGGGTGAGTAACACGTGGGTAACCTGCCCATAAGACTGGGATAACTCCGGGAAACCGGGGCTAATACCGGATAACATTTTGAACCGCATGGTTCGAAATTGAAAGGCGGCTTCGGCTGTCACTTATGGATGGACCCGCGTCGCATTAGCTAGTTGGTGAGGTAACGGCTCACCAAGGCAACGATGCGTAGCCGACCTGAGAGGGTGATCGGCCACACTGGGACTGAGACACGGCCCAGACTCCTACGGGAGGCAGCAGTAGGGAATCTTCCGCAATGGACGAAAGTCTGACGGAGCAACG…	(27f 1492r
Pc127	EU333135	Seemann et al., 2009	Palythoa caribaeorum				Curaçao, Netherland Antilles,				Firmicutes	Bacilli	Bacillales	Bacillaceae	Bacillus	sp.	99	Blood agar	06-DEC-2007	AGTCGAGACGAATGGGATTAAGAGCTTGCTCTTATGAAGTTAGCGGCGGACGGGTGAGTAACACGTGGGTAACCTGCCCATAAGACTGGGATAACTCCGGGAAACCGGGGCTAATACCGGATAACATTTTGAACCGCATGGTTCGAAATTGAAAGGCGGCTTCGGCTGTCACTTATGGATGGACCCGCGTCGCATTAGCTAGTTGGTGAGGTAACGGCTCACCAAGGCAACGATGCGTAGCCGACCTGAGAGGGTGATCGGCCACACTGGGACTGAGACACGGCCCAGACTCCTACGGGAGGCAGCAGTAGGGAATCTTCCGCAATGGACGAAAGTCTGACGGAGCAACGCCGCGTGAGTGATGAAGGCTTTCGGGTCGTAAAACTCTGTTGTTAGGGA…	(27f 1492r
Pc145	EU333137	Seemann et al., 2009	Palythoa caribaeorum				Curaçao, Netherland Antilles,				Firmicutes	Bacilli	Bacillales	Bacillaceae	Bacillus	sp.	99	Blood agar	06-DEC-2007	CGAGNCGAATGGNATTAAGAGCTTGCTCTTATGAAGTTAGCGGCGGACGGGTGAGTAACACGTGGGTAACCTGCCCATAAGACTGGGATAACTCCGGGAAACCGGGGCTAATACCGGATAACATTTTGAACCGCATGGTTCGAAATTGAAAGGCGGCTTCGGCTGTCACTTATGGATGGACCCGCGTCGCATTAGCTAGTTGGTGAGGTAACGGCTCACCAAGGCAACGATGCGTAGCCGACCTGAGAGGGTGATCGGCCACACTGGGACTGAGACACGGCCCAGACTCCTACGGGAGGCAGCAGTAGGGAATCTTCCGCAATGGACGAAAGTCTGACGGAGCAACGCCGCGTGAGTGATGAAGGCTTTCGGGTCGTAAAACTCTGTTGTTAGGGAAGA…	(27f 1492r
Pc217	EU333143	Seemann et al., 2009	Palythoa caribaeorum				Curaçao, Netherland Antilles,				Firmicutes	Bacilli	Bacillales	Bacillaceae	Bacillus	sp.	99	Blood agar	06-DEC-2007	GAGTTTGATCCTGGCTCAGGATGAACGCTGGCGGCGTGCCTAATACATGCAAGTCGAGCGAATGGATTAAGAGCTTGCTCTTATGAAGTTAGCGGCGGACGGGTGAGTAACACGTGGGTAACCTGCCCATAAGACTGGGATAACTCCGGGAAACCGGGGCTAATACCGGATAACATTTTGAACCGCATGGTTCGAAATTGAAAGGCGGCTTCGGCTGTCACTTATGGATGGACCCGCGTCGCATTAGCTAGTTGGTGAGGTAACGGCTCACCAAGGCAACGATGCGTAGCCGACCTGAGAGGGTGATCGGCCACACTGGGACTGAGACACGGCCCAGACTCCTACGGGAGGCAGCAGTAGGGAATCTTCCGCAATGGACGAAAGTCTGACGGAGCAACG…	(27f 1492r
PaH2.09a1	GQ406747	Vizcaino et al. (2010)	Pseudopterogorgia americana		healthy		Media Luna reef (17° 93.481 N, 67° 04.782 W)				Firmicutes	Bacilli	Bacillales	Bacillaceae	Bacillus	sp.	99	glycerol artificial seawater (GASW) agar	22-JUL-2009	TGCAGTCGAGCGAACTGATTAGAAGCTTGCTTCTATGACGTTAGCGGCGGACGGGTGAGTAACACGTGGGCAACCTGCCTGTAAGACTGGGATAACTTCGGGAAACCGAAGCTAATACCGGATAGGATCTTCTCCTTCATGGGAGATGATTGAAAGATGGTTTCGGCTATCACTTACAGATGGGCCCGCGGTGCATTAGCTAGTTGGTGAGGTAACGGCTCACCAAGGCAACGATGCATAGCCGACCTGAGAGGGTGATCGGCCACACTGGGACTGAGACACGGCCCAGACTCCTACGGGAGGCAGCAGTAGGGAATCTTCCGCAATGGACGAAAGTCTGACGGAGCAACGCCGCGTGAGTGATGAAGGCTTTCGGGTCGTAAAACTCTGTTGTTAGGG…	27F 1492R
PaH2.09a	GQ406746	Vizcaino et al. (2010)	Pseudopterogorgia americana		healthy		Media Luna reef (17° 93.481 N, 67° 04.782 W)				Firmicutes	Bacilli	Bacillales	Bacillaceae	Bacillus	sp.	99	glycerol artificial seawater (GASW) agar	22-JUL-2009	GTCGAGCGAACTGATTAGAAGCTTGCTTCTATGACGTTAGCGGCGGACGGGTGAGTAACACGTGGGGCAACCTGCCTGTAAGACTGGGATAACTTCGGGAAACCGAAGCTAATACCGGATAGGATCTTCTCCTTCATGGGAGATGATTGAAAGATGGTTTCGGCTATCACTTACAGATGGGCCCGCGGTGCATTAGCTAGTTGGTGAGGTAACGGCTCACCAAGGCAACGATGCATAGCCGACCTGAGAGGGGTGATCGGCCACACTGGGACTGAGACACGGCCCCAGACTCCTACGGGAGGCAGCAGTAGGGAATCTTCCGCAATGGACGAAAGTCTGACGGAGCAACGCCGCGTGAGTGATGAAGGCTTTCGGGTCGTAAAACTCTGTTGTTAGGGA…	27F 1492R
S1cc4	DQ416567	Koren & Rosenberg (2006)	Oculina patagonica				Sedot Yam, in the Mediterranean off the coast of Israel				Firmicutes	Bacilli	Bacillales	Bacillaceae	Bacillus	sp.	99	Marine agar	27-FEB-2006	GACGAACGCTGGCGGCGTGCCTAATACATGCAAGTCGAGCGAATCTTGAGGTGCTTGCACCTCTTGGTTAGCGGCGGACGGGTGAGTAACACGTGGGCAACCTGCCTGTAAGACTGGGATAACACCGGGAAACCGGTGCTAATACCGGATAATCCTTTTCCTCTCATGAGGAAAAGCTGAAAGTCGGTTTACGCTGACACTTACAGATGGGCCCGCGGCGCATTAGCTAGTTGGTGAGGTAACGGCTCACCAAGGCGACGATGCGTAGCCGACCTGAGAGGGTGATCGGCCACACTGGGACTGAGACACGGCCCAGACTCCTACGGGAGGCAGCAGTAGGGAATCTTCCGCAATGGACGAAAGTCTGACGGAGCAACGCCGCGTGAGCGATGAAGGCCT…	8F 1492R
S1cc86	DQ416601	Koren & Rosenberg (2006)	Oculina patagonica				Sedot Yam, in the Mediterranean off the coast of Israel				Firmicutes	Bacilli	Bacillales	Bacillaceae	Bacillus	sp.	100	Marine agar	27-FEB-2006	TGTAACTGACGCTGAGGCGCGAAAGCGTGGGGAGCAAACAGGATTAGATACCCTGGTAGTCCACGCCGTAAACGATGAGTGCTAGGTGTTAGGGGTTTCGATGCCCGTAGTGCCGAAGTTAACACATTAAGCACTCCGCCTGGGGAGTACGGCCGCAAGGCTGAAACTCAAAGGAATTGACGGGGACCCGCACAAGCAGTGGAGCATGTGGTTTAATTCGAAGCAACGCGAAGAACCTTACCAGGTCTTGACATCCTTTGACCACCCAAGAGATTGGGCTTCCCCTTCGGGGGCAAAGTGACAGGTGGTGCATGGTTGTCGTCAGCTCGTGTCGTGAGATGTTGGGTTAAGTCCCGCAACGAGCGCAACCCTTGATCTTAGTTGCCAGCATTGAGTTGG…	8F 1492R
w2cb3	DQ416643	Koren & Rosenberg (2006)	Oculina patagonica				Sedot Yam, in the Mediterranean off the coast of Israel				Firmicutes	Bacilli	Bacillales	Bacillaceae	Bacillus	sp.	99	Marine agar	27-FEB-2006	TTAGTGCTGCAGCTAACGCATTAAGCACTCCGCCTGGGGAGTACGGTCGCAAGACTGAAACTCAAAGGAATTGACGGGGGCCCGCACAAGCGGTGGAGCATGTGGTTTAATTCGAAGCAACGCGAAGAACCTTACCAGGTCTTGACATCCTCTGACAACCCTAGAGATAGGGCTTTCCCTTCGGGGACAGAGTGACAGGTGGTGCATGGTTGTCGTCAGCTCGTGTCGTGAGATGTTGGGTTAAGTCCCGCAACGAGCGCAACCCTTGATCTTAGTTGCCAGCATTCAGTTGGGCACTCTAAGGTGACTGCCGGTGACAAACCGGAGGAAGGTGGGGATGACGTCAAATCATCATGCCCCTTATGACCTGGGCTACACACGTGCTACAATGGACAGAAC…	8F 1492R
w2cc35	DQ416649	Koren & Rosenberg (2006)	Oculina patagonica				Sedot Yam, in the Mediterranean off the coast of Israel				Firmicutes	Bacilli	Bacillales	Bacillaceae	Bacillus	sp.	100	Marine agar	27-FEB-2006	GCAAACAGGATTAGATACCCTGGTAGTCCACGCCGTAAACGATGAGTGCTAAGTGTTAGAGGGTTTCCGCCCTTTAGTGCTGCAGCTAACGCATTAAGCACTCCGCCTGGGGAGTACGGTCGCAAGACTGAAACTCAAAGGAATTGACGGGGGCCCGCACAAGCGGTGGAGCATGTGGTTTAATTCGAAGCAACGCGAAGAACCTTACCAGGTCTTGACATCCTCTGACAACCCTAGAGATAGGGCTTTCCCCTTCGGGGGACAGAGTGACAGGTGGTGCATGGTTGTCGTCAGCTCGTGTCGTGAGATGTTGGGTTAAGTCCCGCAACGAGCGCAACCCTTGATCTTAGTTGCCAGCATTCAGTTGGGCACTCTAAGGTGACTGCCGGTGACAAACCG…	8F 1492R
w3ca2	DQ416655	Koren & Rosenberg (2006)	Oculina patagonica				Sedot Yam, in the Mediterranean off the coast of Israel				Firmicutes	Bacilli	Bacillales				99	Marine agar	27-FEB-2006	AAACGATGAGTGCTAAGTGTTAGGGGGTTTCCGCCCCTTAGTGCTGCAGCTAACGCATTAAGCACTCCGCCTGGGGAGTACGGCCGCAAGGCTGAAACTCAAAGGAATTGACGGGGGCCCGCACAAGCGGTGGAGCATGTGGTTTAATTCGAAGCAACGCGAAGAACCTTACCAGGTCTTGACATCCCACTGACCGGCTTAGAGATAAGTCTTTCCCTTCGGGGACAGTGGTGACAGGTGGTGCATGGTTGTCGTCAGCTCGTGTCGTGAGATGTTGGGTTAAGTCCCGCAACGAGCGCAACCCTTGATCTTAGTTGCCAGCATTTAGTTGGGCACTCTAAGGTGACTGCCGGTGACAAACCGGAGGAAGGTGGGGATGACGTCAAATCATCATGCCCC…	8F 1492R
w3cb16	DQ416665	Koren & Rosenberg (2006)	Oculina patagonica				Sedot Yam, in the Mediterranean off the coast of Israel				Firmicutes	Bacilli	Bacillales	Bacillaceae	Bacillus	sp.	99	Marine agar	27-FEB-2006	GGCGGCGTGCCTAATACATGCAAGTCGAGCGGACTTACAAAAGCTTGCTTTTGTAAGTTAGCGGCGGACGGGTGAGTAACACGTGGGCAACCTGCCCTNGAGACTGGGATAACTTCGGGAAACCGGAGCTAATACCGGATAATATAAGGAACCTCCTGGTTCCTTNTTGAAAGATGGTTTCGGCTATCACTTNAGGATGGGCCCGCGGCGCATTAGCTAGTTGGTGAGGTAACGGCTCACCAAGGCGACGATGCGTAGCCGACCTGAGAGGGTGATCGGCCACACTGGGACTGAGACACGGCCCAGACTCCTACGGGAGGCAGCAGTAGGGAATCTTCCACAATGGACGAAAGTCTGATGGAGCAACGCCGCGTGAGTGATGAAGGCCTTCGGGTCGTA…	8F 1492R
16D	JF792082	Cardenas, et al., 2012	Diploria strigosa and Siderastrea siderea	15		28	reef off Aguja Island (11°18′57″N, 74°11′41″W) in the Tayrona National Park, Colombia		28		Firmicutes	Bacilli	Bacillales	Bacillaceae	Bacillus	sp.	99	Luria Bertani and Marine agar	06-MAR-2011	TGATTAGAAGCTTGCTTCTATGACGTTAGCGGCGGACGGGTGAGTAACACGTGGGCAACCTGCCTGTAAGACTGGGATAACTTCGGGAAACCGAAGCTAATACCGGATAGGATCTTCTCCTTCATGGGAGATGATTGAAAGATGGTTTCGGCTATCACTTACAGATGGGCCCGCGGTGCATTAGCTAGTTGGTGAGGTAACGGCTCACCAAGGCAACGATGCATAGCCGACCTGAGAGGGTGATCGGCCACACTGGGACTGAGACACGGCCCAGACTCCTACGGGAGGCAGCAGTAGGGAATCTTCCGCAATGGACGAAAGTCTGACGGAGCAACGCCGCGTGAGTGATGAAGGCTTTCGGGTCGTAAAACTCTGTTGTTAGGGAAGAACAAGTACNAG…	27F 1492R
Mcap_H282	KP640578	Shore-Maggio, et al., 2015	Montipora capitatam	1 to 3	healthy		reef from Moku O Loe, Kaneohe Bay, Oahu, HI	whole fragment	28	https://aem.asm.org/content/early/2015/08/03/AEM.01935-15	Firmicutes	Bacilli	Bacillales	Bacillaceae	Bacillus	sp.	100	glycerol artificial seawater agar (GASWA)	12-JAN-2015	CGAAGAGATGGGAGCTTGCTCCCTGATCTTAGCGGCGGACGGGTGAGTAACACGTGGGCAACCTGCCCTGCAGACTGGGATAACTCCGGGAAACCGGAGCTAATACCGGGTAATACATCGCACCGCATGGTGCAATGTTGAAAGTTGGCTTTCTGAGCTAACACTGCAGGATGGGCCCGCGGCGCATTAGCTAGTTGGTAAGGTAATGGCTTACCAAGGCGACGATGCGTAGCCGACCTGAGAGGGTGATCGGCCACACTGGGACTGAGACACGGCCCAGACTCCTACGGGAGGCAGCAGTAGGGAATCTTCCGCAATGGACGAAAGTCTGACGGAGCAACGCCGCGTGAGTGACGAAGGCCTTCGGGTCGTAAAGCTCTGTTGTTAGGGAAGAACAAG…	8F 1513R	https://aem.asm.org/content/early/2015/08/03/AEM.01935-15
Mcap_H276	KP640579	Shore-Maggio, et al., 2015	Montipora capitatam	1 to 3	healthy		reef from Moku O Loe, Kaneohe Bay, Oahu, HI	whole fragment	28		Firmicutes	Bacilli	Bacillales	Bacillaceae	Bacillus	sp.	100	glycerol artificial seawater agar (GASWA)	12-JAN-2015	CCGGAGCTAATACCGGGTAATACATCGCACCGCATGGTGCAATGTTGAAAGTTGGCTTTCTGAGCTAACACTGCAGGATGGGCCCGCGGCGCATTAGCTAGTTGGTAAGGTAATGGCTTACCAAGGCGACGATGCGTAGCCGACCTGAGAGGGTGATCGGCCACACTGGGACTGAGACACGGCCCAGACTCCTACGGGAGGCAGCAGTAGGGAATCTTCCGCAATGGACGAAAGTCTGACGGAGCAACGCCGCGTGAGTGACGAAGGCCTTCGGGTCGTAAAGCTCTGTTGTTAGGGAAGAACAAGTACCGTTCGAATAGGGCGGTACCTTGACGGTACCTAACCAGAAAGCCACGGCTAACTACGTGCCAGCAGCCGCGGTAATACGTAGGTGGCAAG…	8F 1513R
Mcap_H223	KP640584	Shore-Maggio, et al., 2015	Montipora capitatam	1 to 3	healthy		reef from Moku O Loe, Kaneohe Bay, Oahu, HI	whole fragment	28		Firmicutes	Bacilli	Bacillales	Bacillaceae	Lysinibacillus	sp.	100	glycerol artificial seawater agar (GASWA)	12-JAN-2015	CCGGGGGGGGGGTGCCTATAATGCAGTCGAGCGAACAGAGAAGGAGCTTGCTCCTTCGACGTTAGCGGCGGACGGGTGAGTAACACGTGGGCAACCTACCTTATAGTTTGGGATAACTCCGGGAAACCGGGGCTAATACCGAATAATCTGTTTCACCTCATGGTGAAACACTGAAAGACGGTTTCGGCTGTCGCTATAGGATGGGCCCGCGGCGCATTAGCTAGTTGGTGAGGTAACGGCTCACCAAGGCGACGATGCGTAGCCGACCTGAGAGGGTGATCGGCCACACTGGGACTGAGACACGGCCCAGACTCCTACGGGAGGCAGCAGTAGGGAATCTTCCACAATGGGCGAAAGCCTGATGGAGCAACGCCGCGTGAGTGAAGAAGGATTTCGGTT…	8F 1513R
A-1-2A	KT583311	Pham et al., 2015	Alcyonium digitatum	23–30			Kattegat, Baltic Sea (Germany)-site Baltic 1 (57°00.773N–11°34.835E), site Baltic 2 (56°58.805N–11°35.166E), and site Baltic 3 (56°42.041N–11°44.185E)		28 and 10	https://link.springer.com/article/10.1007/s10482-015-0613-1	Firmicutes	Bacilli	Bacillales	Bacillaceae	Lysinibacillus	sp.	99	Custom media, see reference for details	24-AUG-2015	AGAGTTTGATCATGGCTCAGGACGAACGCTGGCGGCGTGCCTAATACATGCAAGTCGAGCGAACAGAGAAGGAGCTTGCTCCTTTGACGTTAGCGGCGGACGGGTGAGTAACACGTGGGCAACCTACCTTATAGTTTGGGATAACTCCGGGAAACCGGGGCTAATACCGAATAATCTGTTTCACCTCATGGTGAAATATTGAAAGACGGTTTCGGCTGTCGCTATAGGATGGGCCCGCGGCGCATTAGCTAGTTGGTGAGGTAACGGCTCACCAAGGCGACGATGCGTAGCCGACCTGAGAGGGTGATCGGCCACACTGGGACTGAGACACGGCCCAGACTCCTACGGGAGGCAGCAGTAGGGAATCTTCCACAATGGGCGAAAGCCTGATGGAGCAAC…	27f 1492r/1525r	https://link.springer.com/article/10.1007/s10482-015-0613-1
A-1-2B	KT583312	Pham et al., 2015	Alcyonium digitatum	23–30			Kattegat, Baltic Sea (Germany)-site Baltic 1 (57°00.773N–11°34.835E), site Baltic 2 (56°58.805N–11°35.166E), and site Baltic 3 (56°42.041N–11°44.185E)		28 and 10		Firmicutes	Bacilli	Bacillales	Bacillaceae	Lysinibacillus	sp.	98	Custom media, see reference for details	24-AUG-2015	GAGTTTGATCATGGCTCAGGACGAACGCTGGCGGCGTGCCTAATACATGCAAGTCGAGCGAACAGAGAAGGAGCTTGCTCCTTTGACGTTAGCGGCGGACGGGTGAGTAACACGTGGGCAACCTACCTTATAGTTTSGGATAACTCCGGGAAACCGGGGCTAATACCGAATAATCTGTTTCACCTCATGGTGAAATATTGAAAGACGGTTTCGGCTGTCGCTATAGGATGGGCCCGCGGCGCATTAGCTAGTTGGTGAGGTAACGGCTCACCAAGGCGACGATGCGTAGCCGACCTGAGAGGGTGATCGGCCACACTGGGACTGAGACACGGCCCAGACTCCTACGGGAGGCAGCAGTAGGGAATCTTCCACAATGGGCGAAAGCCTGATGGAGCAACG…	27f 1492r/1525r
A-1-4A	KT583314	Pham et al., 2015	Alcyonium digitatum	23–30			Kattegat, Baltic Sea (Germany)-site Baltic 1 (57°00.773N–11°34.835E), site Baltic 2 (56°58.805N–11°35.166E), and site Baltic 3 (56°42.041N–11°44.185E)		28 and 10		Firmicutes	Bacilli	Bacillales	Bacillaceae	Bacillus	sp.	99	Custom media, see reference for details	24-AUG-2015	GTCTGACGGAGCACGCCGCGTGAGTGATGAAGGCTTTCGGGTCGTAAAACTCTGTTGTTAGGGAAGAACAAGTGCTAGTTGAATAAGCTGGCACCTTGACGGTACCTAACCAGAAAGCCACGGCTAACTACGTGCCAGCAGCCGCGGTAATACGTAGGTGGCAAGCGTTATCCGGAATTATTGGGCGTAAAGCGCGCGCAGGTGGTTTCTTAAGTCTGATGTGAAAGCCCACGGCTCAACCGTGGAGGGTCATTGGAAACTGGGAGACTTGAGTGCAGAAGAGGAAAGTGGAATTCCATGTGTAGCGGTGAAATGCGTAGAGATATGGAGGAACACCAGTGGCGAAGGCGACTTTCTGGTCTGTAACTGACACTGAGGCGCGAAAGCGTGGGGAGCAAA…	27f 1492r/1525r
A-1-6A	KT583315	Pham et al., 2015	Alcyonium digitatum	23–30			Kattegat, Baltic Sea (Germany)-site Baltic 1 (57°00.773N–11°34.835E), site Baltic 2 (56°58.805N–11°35.166E), and site Baltic 3 (56°42.041N–11°44.185E)		28 and 10		Firmicutes	Bacilli	Bacillales	Bacillaceae	Bacillus	sp.	99	Custom media, see reference for details	24-AUG-2015	AGTTTGATCATGGCTCAGGACGAACGCTGGCGGCGTGCCTAATACATGCAAGTCGAGCGGACAGATGGGAGCTTGCTCCCTGATGTTAGCGGCGGACGGGTGAGTAACACGTGGGTAACCTGCCTGTAAGACTGGGATAACTCCGGGAAACCGGGGCTAATACCGGATGGTTGTCTGAACCGCATGGTTCAGACATAAAAGGTGGCTTCGGCTACCACTTACAGATGGACCCGCGGCGCATTAGCTAGTTGGTGAGGTAACGGCTCACCAAGGCGACGATGCGTAGCCGACCTGAGAGGGTGATCGGCCACACTGGGACTGAGACACGGCCCAGACTCCTACGGGAGGCAGCAGTAGGGAATCTTCCGCAATGGACGAAAGTCTGACGGAGCAACGCCG…	27f 1492r/1525r
A-1-8	KT583316	Pham et al., 2015	Alcyonium digitatum	23–30			Kattegat, Baltic Sea (Germany)-site Baltic 1 (57°00.773N–11°34.835E), site Baltic 2 (56°58.805N–11°35.166E), and site Baltic 3 (56°42.041N–11°44.185E)		28 and 10		Firmicutes	Bacilli	Bacillales	Bacillaceae	Lysinibacillus	sp.	100	Custom media, see reference for details	24-AUG-2015	GGAGCTTGCTCCTTTGACGTTAGCGGCGGACGGGTGAGTAACACGTGGGCAACCTACCCTATAGTTTGGGATAACTCCGGGAAACCGGGGCTAATACCGAATAATCTCTTTTGCTTCATGGCAAGAGACTGAAAGACGGTTTCGGCTGTCGCTATAGGATGGGCCCGCGGCGCATTAGCTAGTTGGTGAGGTAACGGCTCACCAAGGCGACGATGCGTAGCCGACCTGAGAGGGTGATCGGCCACACTGGGACTGAGACACGGCCCAGACTCCTACGGGAGGCAGCAGTAGGGAATCTTCCACAATGGGCGAAAGCCTGATGGAGCAACGCCGCGTGAGTGAAGAAGGTTTTCGGATCGTAAAACTCTGTTGTAAGGGAAGAACAAGTACAGTAGTAAC…	27f 1492r/1525r
A-1-9	KT583317	Pham et al., 2015	Alcyonium digitatum	23–30			Kattegat, Baltic Sea (Germany)-site Baltic 1 (57°00.773N–11°34.835E), site Baltic 2 (56°58.805N–11°35.166E), and site Baltic 3 (56°42.041N–11°44.185E)		28 and 10		Firmicutes	Bacilli	Bacillales	Bacillaceae	Bacillus	sp.	99	Custom media, see reference for details	24-AUG-2015	GATCATGGCTCAGGATGAACGCTGGCGGCGTGCCTAATACATGCAAGTCGAGCGAATGGATTGAGAGCTTGCTCTCAAGAAGTTAGCGGCGGACGGGTGAGTAACACGTGGGTAACCTGCCCATAAGACTGGGATAACTCCGGGAAACCGGGGCTAATACCGGATAACATTTTGAACYGCATGGTTCGAAATTGAAAGGCGGCTTCGGCTGTCACTTATGGATGGACCCGCGTCGCATTAGCTAGTTGGTGAGGTAACGGCTCACCAAGGCAACGATGCGTAGCCGACCTGAGAGGGTGATCGGCCACACTGGGACTGAGACACGGCCCAGACTCCTACGGGAGGCAGCAGTAGGGAATCTTCCGCAATGGACGAAAGTCTGACGGAGCAACGCCGCGT…	27f 1492r/1525r
A-1-10	KT583318	Pham et al., 2015	Alcyonium digitatum	23–30			Kattegat, Baltic Sea (Germany)-site Baltic 1 (57°00.773N–11°34.835E), site Baltic 2 (56°58.805N–11°35.166E), and site Baltic 3 (56°42.041N–11°44.185E)		28 and 10		Firmicutes	Bacilli	Bacillales	Bacillaceae	Lysinibacillus	sp.	99	Custom media, see reference for details	24-AUG-2015	GGTGAGTAACACGTGGGCAACCTACCCTATAGTTTGGGATAACTCCGGGAAACCGGGGCTAATACCGAATAATCTCTTTTGCTTCATGGCAARAGACTGAAAGACGGTTTCGGCTGTCGCTATAGGATGGGCCCGCGGCGCATTAGCTAGTTGGTGAGGTAACGGCTCACCAAGGCGACGATGCGTAGCCGACCTGAGAGGGTGATCGGCCACACTGGGACTGAGACACGGCCCAGACTCCTACGGGAGGCAGCAGTAGGGAATCTTCCACAATGGGCGAAAGCCTGATGGAGCAACGCCGCGTGAGTGAAGAAGGTTTTCGGATCGTAAAACTCTGTTGTAAGGGAAGAACAAGTACAGTAGTAACTGGCTGTACCTTGACGGTACCTTATTAGAAAG…	27f 1492r/1525r
A-1-11	KT583319	Pham et al., 2015	Alcyonium digitatum	23–30			Kattegat, Baltic Sea (Germany)-site Baltic 1 (57°00.773N–11°34.835E), site Baltic 2 (56°58.805N–11°35.166E), and site Baltic 3 (56°42.041N–11°44.185E)		28 and 10		Firmicutes	Bacilli	Bacillales	Bacillaceae	Lysinibacillus	sp.	99	Custom media, see reference for details	24-AUG-2015	CTCAGGACGAACGCTGGCGGCGTGCCTAATACATGCAAGTCGAGCGAACAGAGAAGGAGCTTGCTCCTTTGACGTTAGCGGCGGACGGGTGAGTAACACGTGGGCAACCTACCTTATAGTTTGGGATAACTCCGGGAAACCGGGGCTAATACCGAATAATCTGTTTCACCTCATGGTGAAATATTGAAAGACGGTTTCGGCTGTCGCTATAGGATGGGCCCGCGGCGCATTAGCTAGTTGGTGAGGTAACGGCTCACCAAGGCGACGATGCGTAGCCGACCTGAGAGGGTGATCGGCCACACTGGGACTGAGACACGGCCCAGACTCCTACGGGAGGCAGCAGTAGGGAATCTTCCACAATGGGCGAAAGCCTGATGGAGCAACGCCGCGTGAGTGAAG…	27f 1492r/1525r
A-1-13	KT583321	Pham et al., 2015	Alcyonium digitatum	23–30			Kattegat, Baltic Sea (Germany)-site Baltic 1 (57°00.773N–11°34.835E), site Baltic 2 (56°58.805N–11°35.166E), and site Baltic 3 (56°42.041N–11°44.185E)		28 and 10		Firmicutes	Bacilli	Bacillales	Bacillaceae	Bacillus	sp.	99	Custom media, see reference for details	24-AUG-2015	TAATACATGCAAGTCGAGCGGACAGATGGGAGCTTGCTCCCTGATGTTAGCGGCGGACGGGTGAGTAACACGTGGGTAACCTGCCTGTAAGACTGGGATAACTCCGGGAAACCGGGGCTAATACCGGATGGTTGTCTGAACCGCATGGTTCAGACATAAAAGGTGGCTTCGGCTACCACTTACAGATGGACCCGCGGCGCATTAGCTAGTTGGTGAGGTAACGGCTCACCAAGGCGACGATGCGTAGCCGACCTGAGAGGGTGATCGGCCACACTGGGACTGAGACACGGCCCAGACTCCTACGGGAGGCAGCAGTAGGGAATCTTCCGCAATGGACGAAAGTCTGACGGAGCAACGCCGCGTGAGTGATGAAGGTTTTCGGATCGTAAAGCTCTGTTG…	27f 1492r/1525r
A-1-14A	KT583322	Pham et al., 2015	Alcyonium digitatum	23–30			Kattegat, Baltic Sea (Germany)-site Baltic 1 (57°00.773N–11°34.835E), site Baltic 2 (56°58.805N–11°35.166E), and site Baltic 3 (56°42.041N–11°44.185E)		28 and 10		Firmicutes	Bacilli	Bacillales	Bacillaceae	Bacillus	sp.	100	Custom media, see reference for details	24-AUG-2015	TAGAGTTTGATCATGGCTCAGGATGAACGCTGGCGGCGTGCCTAATACATGCAAGTCGAGCGAATGGATTGAGAGCTTGCTCTCAAGAAGTTAGCGGCGGACGGGTGAGTAACACGTGGGTAACCTGCCCATAAGACTGGGATAACTCCGGGAAACCGGGGCTAATACCGGATAACATTTTGAACTGCATGGTTCGAAATTGAAAGGCGGCTTCGGCTGTCACTTATGGATGGACCCGCGTCGCATTAGCTAGTTGGTGAGGTAACGGCTCACCAAGGCAACGATGCGTAGCCGACCTGAGAGGGTGATCGGCCACACTGGGACTGAGACACGGCCCAGACTCCTACGGGAGGCAGCAGTAGGGAATCTTCCGCAATGGACGAAAGTCTGACGGAGCAA…	27f 1492r/1525r
A-1-14B	KT583323	Pham et al., 2015	Alcyonium digitatum	23–30			Kattegat, Baltic Sea (Germany)-site Baltic 1 (57°00.773N–11°34.835E), site Baltic 2 (56°58.805N–11°35.166E), and site Baltic 3 (56°42.041N–11°44.185E)		28 and 10		Firmicutes	Bacilli	Bacillales	Bacillaceae	Bacillus	sp.	99	Custom media, see reference for details	24-AUG-2015	TTGATCATGGCTCAGGATGAACGCTGGCGGCGTGCCTAATACATGCAAGTCGAGCGAATGGATTGAGAGCTTGCTCTCAAGAAGTTAGCGGCGGACGGGTGAGTAACACGTGGGTAACCTGCCCATAAGACTGGGATAACTCCGGGAAACCGGGGCTAATACCGGATAACATTTTGAACTGCATGGTTCGAAATTGAAAGGCGGCTTCGGCTGTCACTTATGGATGGACCCGCGTCGCATTAGCTAGTTGGTGAGGTAACGGCTCACCAAGGCAACGATGCGTAGCCGACCTGAGAGGGTGATCGGCCACACTGGGACTGAGACACGGCCCAGACTCCTACGGGAGGCAGCAGTAGGGAATCTTCCGCAATGGACGAAAGTCTGACGGAGCAACGCCGC…	27f 1492r/1525r
A-1-15	KT583324	Pham et al., 2015	Alcyonium digitatum	23–30			Kattegat, Baltic Sea (Germany)-site Baltic 1 (57°00.773N–11°34.835E), site Baltic 2 (56°58.805N–11°35.166E), and site Baltic 3 (56°42.041N–11°44.185E)		28 and 10		Firmicutes	Bacilli	Bacillales	Bacillaceae	Bacillus	sp.	99	Custom media, see reference for details	24-AUG-2015	AGGTAACGGCTCACCAAGGCAACGATGCGTAGCCGACCTGAGAGGGTGATCGGCCACACTGGGACTGAGACACGGCCCAGACTCCTACGGGAGGCAGCAGTAGGGAATCTTCCGCAATGGACGAAAGTCTGACGGAGCAACGCCGCGTGAGTGATGAAGGCTTTCGGGTCGTAAAACTCTGTTGTTAGGGAAGAACAAGTGCTAGTTGAATAAGCYGGCACCTTGACGGTACCTAACCAGAAAGCCACGGCTAACTACGTGCCAGCAGCCGCGGTAATACGTAGGTGGCAAGCGTTATCCGGAATTATTGGGCGTAAAGCGCGCGCAGGTGGTTTCTTAAGTCTGATGTGAAAGCCCACGGCTCAACCGTGGAGGGTCATTGGAAACTGGGAGACTTGA…	27f 1492r/1525r
A-1-16	KT583325	Pham et al., 2015	Alcyonium digitatum	23–30			Kattegat, Baltic Sea (Germany)-site Baltic 1 (57°00.773N–11°34.835E), site Baltic 2 (56°58.805N–11°35.166E), and site Baltic 3 (56°42.041N–11°44.185E)		28 and 10		Firmicutes	Bacilli	Bacillales	Bacillaceae	Lysinibacillus	sp.	99	Custom media, see reference for details	24-AUG-2015	AGTCGAGCGAACAGAAAAGGAGCTTGCTCCTTTGACGTTAGCGGCGGACGGGTGAGTAACACGTGGGCAACCTACCCTATAGTTTGGGATAACTCCGGGAAACCGGGGCTAATACCGAATAATNTCTTTTGCTTCATGGCAARAGACTGAAAGACGGTTTCGGCTGTCGCTATAGGATGGGCCCGCGGCGCATTAGCTAGTTGGTGAGGTAACGGCTCACCAAGGCGACGATGCGTAGCCGACCTGAGAGGGTGATCGGCCACACTGGGACTGAGACACGGCCCAGACTCCTACGGGAGGCAGCAGTAGGGAATCTTCCACAATGGGCGAAAGCCTGATGGAGCAACGCCGCGTGAGTGAAGAAGGTTTTCGGATCGTAAAACTCTGTTGTAAGGGAAG…	27f 1492r/1525r
A-1-18	KT583326	Pham et al., 2015	Alcyonium digitatum	23–30			Kattegat, Baltic Sea (Germany)-site Baltic 1 (57°00.773N–11°34.835E), site Baltic 2 (56°58.805N–11°35.166E), and site Baltic 3 (56°42.041N–11°44.185E)		28 and 10		Firmicutes	Bacilli	Bacillales	Bacillaceae	Bacillus	sp.	100	Custom media, see reference for details	24-AUG-2015	TTTGATCATGGCTCAGGACGAACGCTGGCGGCGTGCCTAATACATGCAAGTCGAGCGGACAGATGGGAGCTTGCTCCCTGATGTTAGCGGCGGACGGGTGAGTAACACGTGGGTAACCTGCCTGTAAGACTGGGATAACTCCGGGAAACCGGGGCTAATACCGGATGGTTGTCTGAACCGCATGGTTCAGACATAAAAGGTGGCTTCGGCTACCACTTACAGATGGACCCGCGGCGCATTAGCTAGTTGGTGAGGTAACGGCTCACCAAGGCGACGATGCGTAGCCGACCTGAGAGGGTGATCGGCCACACTGGGACTGAGACACGGCCCAGACTCCTACGGGAGGCAGCAGTAGGGAATCTTCCGCAATGGACGAAAGTCTGACGGAGCAACGCCGCG…	27f 1492r/1525r
A-1-20	KT583327	Pham et al., 2015	Alcyonium digitatum	23–30			Kattegat, Baltic Sea (Germany)-site Baltic 1 (57°00.773N–11°34.835E), site Baltic 2 (56°58.805N–11°35.166E), and site Baltic 3 (56°42.041N–11°44.185E)		28 and 10		Firmicutes	Bacilli	Bacillales	Bacillaceae	Bacillus	sp.	100	Custom media, see reference for details	24-AUG-2015	GAGTTTGATCATGGCTCAGGATGAACGCTGGCGGCGTGCCTAATACATGCAAGTCGAGCGAATGGATTGAGAGCTTGCTCTCAAGAAGTTAGCGGCGGACGGGTGAGTAACACGTGGGTAACCTGCCCATAAGACTGGGATAACTCCGGGAAACCGGGGCTAATACCGGATAACATTTTGAACTGCATGGTTCGAAATTGAAAGGCGGCTTCGGCTGTCACTTATGGATGGACCCGCGTCGCATTAGCTAGTTGGTGAGGTAACGGCTCACCAAGGCAACGATGCGTAGCCGACCTGAGAGGGTGATCGGCCACACTGGGACTGAGACACGGCCCAGACTCCTACGGGAGGCAGCAGTAGGGAATCTTCCGCAATGGACGAAAGTCTGACGGAGCAACG…	27f 1492r/1525r
A-1-22	KT583328	Pham et al., 2015	Alcyonium digitatum	23–30			Kattegat, Baltic Sea (Germany)-site Baltic 1 (57°00.773N–11°34.835E), site Baltic 2 (56°58.805N–11°35.166E), and site Baltic 3 (56°42.041N–11°44.185E)		28 and 10		Firmicutes	Bacilli	Bacillales	Bacillaceae	Lysinibacillus	sp.	99	Custom media, see reference for details	24-AUG-2015	TAGAGTTTGATCATGGCTCAGGACGAACGCTGGCGGCGTGCCTAATACATGCAAGTCGAGCGAACAGAGAAGGAGCTTGCTCCTTTGACGTTAGCGGCGGACGGGTGAGTAACACGTGGGCAACCTACCTTATAGTTTGGGATAACTCCGGGAAACCGGGGCTAATACCGAATAATCTGTTTCACCTCATGGTGAAATATTGAAAGACGGTTTCGGCTGTCGCTATAGGATGGGCCCGCGGCGCATTAGCTAGTTGGTGAGGTAACGGCTCACCAAGGCGACGATGCGTAGCCGACCTGAGAGGGTGATCGGCCACACTGGGACTGAGACACGGCCCAGACTCCTACGGGAGGCAGCAGTAGGGAATCTTCCACAATGGGCGAAAGCCTGATGGAGCAA…	27f 1492r/1525r
A-1-26	KT583329	Pham et al., 2015	Alcyonium digitatum	23–30			Kattegat, Baltic Sea (Germany)-site Baltic 1 (57°00.773N–11°34.835E), site Baltic 2 (56°58.805N–11°35.166E), and site Baltic 3 (56°42.041N–11°44.185E)		28 and 10		Firmicutes	Bacilli	Bacillales	Bacillaceae	Bacillus	sp.	100	Custom media, see reference for details	24-AUG-2015	TGATCATGGCTCAGGATGAACGCTGGCGGCGTGCCTAATACATGCAAGTCGAGCGAATGGATTGAGAGCTTGCTCTCAAGAAGTTAGCGGCGGACGGGTGAGTAACACGTGGGTAACCTGCCCATAAGACTGGGATAACTCCGGGAAACCGGGGCTAATACCGGATAACATTTTGAACTGCATGGTTCGAAATTGAAAGGCGGCTTCGGCTGTCACTTATGGATGGACCCGCGTCGCATTAGCTAGTTGGTGAGGTAACGGCTCACCAAGGCAACGATGCGTAGCCGACCTGAGAGGGTGATCGGCCACACTGGGACTGAGACACGGCCCAGACTCCTACGGGAGGCAGCAGTAGGGAATCTTCCGCAATGGACGAAAGTCTGACGGAGCAACGCCGCG…	27f 1492r/1525r
A-1-27	KT583330	Pham et al., 2015	Alcyonium digitatum	23–30			Kattegat, Baltic Sea (Germany)-site Baltic 1 (57°00.773N–11°34.835E), site Baltic 2 (56°58.805N–11°35.166E), and site Baltic 3 (56°42.041N–11°44.185E)		28 and 10		Firmicutes	Bacilli	Bacillales	Incertae sedis	Exiguobacterium	sp.	99	Custom media, see reference for details	24-AUG-2015	GAGTTTGATCATGGCTCAGGACGAACGCTGGCGGCGTGCCTAATACATGCAAGTCGAGCGCAGGAAGCTCGCGGAACTCTTCGGAGGGAAGCAAGTGGAATGAGCGGCGGACGGGTGAGTAACACGTAAGGAACCTGCCTCAAGGATTGGGATAACTCCGAGAAATCGGAGCTAATACCGGATAGTTCTTCGGACCGCATGGTCCGATGATGAAAGGCGCTYCGGCGTCACCTTGAGATGGCCTTGCGGTGCATTAGCTAGTTGGTGGGGTAATGGCCTACCAAGGCGACGATGCATAGCCGACCTGAGAGGGTGATCGGCCACACTGGGACTGAGACACGGCCCAGACTCCTACGGGAGGCAGCAGTAGGGAATCTTCCACAATGGACGAAAGTCTGA…	27f 1492r/1525r
A-1-32	KT583333	Pham et al., 2015	Alcyonium digitatum	23–30			Kattegat, Baltic Sea (Germany)-site Baltic 1 (57°00.773N–11°34.835E), site Baltic 2 (56°58.805N–11°35.166E), and site Baltic 3 (56°42.041N–11°44.185E)		28 and 10		Firmicutes	Bacilli	Bacillales	Bacillaceae	Bacillus	sp.	99	Custom media, see reference for details	24-AUG-2015	TTGATCATGGCTCAGGACGAACGCTGGCGGCGTGCCTAATACATGCAAGTCGAGCGAACAGAAGGGAGCTTGCTCCCGGATGTTAGCGGCGGACGGGTGAGTAACACGTGGGTAACCTGCCTGTAAGACTGGGATAACTCCGGGAAACCGGAGCTAATACCGGATAGTTCCTTGAACCGCATGGTTCAAGGATGAAAGACGGTTTCGGCTGTCACTTACAGATGGACCCGCGGCGCATTAGCTAGTTGGTGGGGTAATGGCTCACCAAGGCGACGATGCGTAGCCGACCTGAGAGGGTGATCGGCCACACTGGGACTGAGACACGGCCCAGACTCCTACGGGAGGCAGCAGTAGGGAATCTTCCGCAATGGACGAAAGTCTGACGGAGCAACGCCGCGT…	27f 1492r/1525r
A-1-34	KT583334	Pham et al., 2015	Alcyonium digitatum	23–30			Kattegat, Baltic Sea (Germany)-site Baltic 1 (57°00.773N–11°34.835E), site Baltic 2 (56°58.805N–11°35.166E), and site Baltic 3 (56°42.041N–11°44.185E)		28 and 10		Firmicutes	Bacilli	Bacillales	Bacillaceae	Bacillus	sp.	99	Custom media, see reference for details	24-AUG-2015	GTTTGATCATGGCTCAGGACGAACGCTGGCGGCGTGCCTAATACATGCAAGTCGAGCGGACAGATGGGAGCTTGCTCCCTGATGTTAGCGGCGGACGGGTGAGTAACACGTGGGTAACCTGCCTGTAAGACTGGGATAACTCCGGGAAACCGGGGCTAATACCGGATGGTTGTCTGAACCGCATGGTTCAGACATAAAAGGTGGCTTCGGCTACCACTTACAGATGGACCCGCGGCGCATTAGCTAGTTGGTGAGGTAACGGCTCACCAAGGCGACGATGCGTAGCCGACCTGAGAGGGTGATCGGCCACACTGGGACTGAGACACGGCCCAGACTCCTACGGGAGGCAGCAGTAGGGAATCTTCCGCAATGGACGAAAGTCTGACGGAGCAACGCCGC…	27f 1492r/1525r
A-1-35	KT583335	Pham et al., 2015	Alcyonium digitatum	23–30			Kattegat, Baltic Sea (Germany)-site Baltic 1 (57°00.773N–11°34.835E), site Baltic 2 (56°58.805N–11°35.166E), and site Baltic 3 (56°42.041N–11°44.185E)		28 and 10		Firmicutes	Bacilli	Bacillales	Bacillaceae	Bacillus	sp.	100	Custom media, see reference for details	24-AUG-2015	AGTTTGATCATGGCTCAGGATGAACGCTGGCGGCGTGCCTAATACATGCAAGTCGAGCGAATGGATTGAGAGCTTGCTCTCAAGAAGTTAGCGGCGGACGGGTGAGTAACACGTGGGTAACCTGCCCATAAGACTGGGATAACTCCGGGAAACCGGGGCTAATACCGGATAACATTTTGAACTGCATGGTTCGAAATTGAAAGGCGGCTTCGGCTGTCACTTATGGATGGACCCGCGTCGCATTAGCTAGTTGGTGAGGTAACGGCTCACCAAGGCAACGATGCGTAGCCGACCTGAGAGGGTGATCGGCCACACTGGGACTGAGACACGGCCCAGACTCCTACGGGAGGCAGCAGTAGGGAATCTTCCGCAATGGACGAAAGTCTGACGGAGCAACGC…	27f 1492r/1525r
A-1-36	KT583336	Pham et al., 2015	Alcyonium digitatum	23–30			Kattegat, Baltic Sea (Germany)-site Baltic 1 (57°00.773N–11°34.835E), site Baltic 2 (56°58.805N–11°35.166E), and site Baltic 3 (56°42.041N–11°44.185E)		28 and 10		Firmicutes	Bacilli	Bacillales	Bacillaceae	Bacillus	sp.	99	Custom media, see reference for details	24-AUG-2015	CTCAGGACGAACGCTGGCGGCGTGCCTAATACATGCAAGTCGAGCGGACAGATGGGAGCTTGCTCCCTGATGTTAGCGGCGGACGGGTGAGTAACACGTGGGTAACCTGCCTGTAAGACTGGGATAAYTCCGGGAAACCGGGGCTAATACCGGATGGTTGTCTGAACCGCATGGTTCAGACATAAAAGGTGGCTTCGGCTACCACTTACAGATGGACCCGCGGCGCATTAGCTAGTTGGTGAGGTAACGGCTCACCAAGGCGACGATGCGTAGCCGACCTGAGAGGGTGATCGGCCACACTGGGACTGAGACACGGCCCAGACTCCTACGGGAGGCAGCAGTAGGGAATCTTCCGCAATGGACGAAAGTCTGACGGAGCAACGCCGCGTGAGTGATGAA…	27f 1492r/1525r
A-1-40B	KT583338	Pham et al., 2015	Alcyonium digitatum	23–30			Kattegat, Baltic Sea (Germany)-site Baltic 1 (57°00.773N–11°34.835E), site Baltic 2 (56°58.805N–11°35.166E), and site Baltic 3 (56°42.041N–11°44.185E)		28 and 10		Firmicutes	Bacilli	Bacillales	Bacillaceae	Lysinibacillus	sp.	99	Custom media, see reference for details	24-AUG-2015	GGCGGCGTGCTTAATACATGCAAGTCGAGCGAACAGAAAAGGAGCTTGCTCCTTTGACGTTAGCGGCGGACGGGTGAGTAACACGTGGGCAACCTACCCTATAGTTTGGGATAACTCCGGGAAACCGGGGCTAATACCGAATAATNTCTTTTGCTTCATGGCAAGAGACTGAAAGACGGTTTCGGCTGTCGCTATAGGATGGGCCCGCGGCGCATTAGCTAGTTGGTGAGGTAACGGCTCACCAAGGCGACGATGCGTAGCCGACCTGAGAGGGTGATCGGCCACACTGGGACTGAGACACGGCCCAGACTCCTACGGGAGGCAGCAGTAGGGAATCTTCCACAATGGGCGAAAGCCTGATGGAGCAACGCCGCGTGAGTGAAGAAGGTTTTCGGATCG…	27f 1492r/1525r
A-1-41	KT583339	Pham et al., 2015	Alcyonium digitatum	23–30			Kattegat, Baltic Sea (Germany)-site Baltic 1 (57°00.773N–11°34.835E), site Baltic 2 (56°58.805N–11°35.166E), and site Baltic 3 (56°42.041N–11°44.185E)		28 and 10		Firmicutes	Bacilli	Bacillales	Bacillaceae	Bacillus	sp.	99	Custom media, see reference for details	24-AUG-2015	TGATCATGGCTCAGGATGAACGCTGGCGGCGTGCCTAATACATGCAAGTCGAGCGAATGGATTGAGAGCTTGCTCTCAAGAAGTTAGCGGCGGACGGGTGAGTAACACGTGGGTAACCTGCCCATAAGACTGGGATAACTCCGGGAAACCGGGGCTAATACCGGATAACATTTTGAACTGCATGGTTCGAAATTGAAAGGCGGCTTCGGCTGTCACTTATGGATGGACCCGCGTCGCATTAGCTAGTTGGTGAGGTAACGGCTCACCAAGGCAACGATGCGTAGCCGACCTGAGAGGGTGATCGGCCACACTGGGACTGAGACACGGCCCAGACTCCTACGGGAGGCAGCAGTAGGGAATCTTCCGCAATGGACGAAAGTCTGACGGAGCAACGCCGCG…	27f 1492r/1525r
B-1-1	KT583341	Pham et al., 2015	Alcyonium digitatum	23–30			Kattegat, Baltic Sea (Germany)-site Baltic 1 (57°00.773N–11°34.835E), site Baltic 2 (56°58.805N–11°35.166E), and site Baltic 3 (56°42.041N–11°44.185E)		28 and 10		Firmicutes	Bacilli	Bacillales	Bacillaceae	Bacillus	sp.	99	Custom media, see reference for details	24-AUG-2015	GAACGCTGGCGGCGTGCCTAATACATGCAAGTCGAGCGAATGGATTGAGAGCTTGCTCTCAAGAAGTTAGCGGCGGACGGGTGAGTAACACGTGGGTAACCTGCCCATAAGACTGGGATAACTCCGGGAAACCGGGGCTAATACCGGATAACATTTTGAACYGCATGGTTCGAAATTGAAAGGCGGCTTCGGCTGTCACTTATGGATGGACCCGCGTCGCATTAGCTAGTTGGTGAGGTAACGGCTCACCAAGGCAACGATGCGTAGCCGACCTGAGAGGGTGATCGGCCACACTGGGACTGAGACACGGCCCAGACTCCTACGGGAGGCAGCAGTAGGGAATCTTCCGCAATGGACGAAAGTCTGACGGAGCAACGCCGCGTGAGTGATGAAGGCTTT…	27f 1492r/1525r
B-1-3	KT583342	Pham et al., 2015	Alcyonium digitatum	23–30			Kattegat, Baltic Sea (Germany)-site Baltic 1 (57°00.773N–11°34.835E), site Baltic 2 (56°58.805N–11°35.166E), and site Baltic 3 (56°42.041N–11°44.185E)		28 and 10		Firmicutes	Bacilli	Bacillales	Bacillaceae	Bacillus	sp.	99	Custom media, see reference for details	24-AUG-2015	ATCATGGCTCAGGATGAACGCTGGCGGCGTGCCTAATACATGCAAGTCGAGCGAATGGATTGAGAGCTTGCTCTCAAGAAGTTAGCGGCGGACGGGTGAGTAACACGTGGGTAACCTGCCCATAAGACTGGGATAACTCCGGGAAACCGGGGCTAATACCGGATAACATTTTGAACYGCATGGTTCGAAATTGAAAGGCGGCTTCGGCTGTCACTTATGGATGGACCCGCGTCGCATTAGCTAGTTGGTGAGGTAACGGCTCACCAAGGCAACGATGCGTAGCCGACCTGAGAGGGTGATCGGCCACACTGGGACTGAGACACGGCCCAGACTCCTACGGGAGGCAGCAGTAGGGAATCTTCCGCAATGGACGAAAGTCTGACGGAGCAACGCCGCGTG…	27f 1492r/1525r
B-1-8	KT583343	Pham et al., 2015	Alcyonium digitatum	23–30			Kattegat, Baltic Sea (Germany)-site Baltic 1 (57°00.773N–11°34.835E), site Baltic 2 (56°58.805N–11°35.166E), and site Baltic 3 (56°42.041N–11°44.185E)		28 and 10		Firmicutes	Bacilli	Bacillales	Bacillaceae	Bacillus	sp.	99	Custom media, see reference for details	24-AUG-2015	ATCATGGCTCAGGACGAACGCTGGCGGCGTGCCTAATACATGCAAGTCGAGCGGACAGATGGGAGCTTGCTCCCTGATGTTAGCGGCGGACGGGTGAGTAACACGTGGGTAACCTGCCTGTAAGACTGGGATAACTCCGGGAAACCGGGGCTAATACCGGATGGTTGTCTGAACCGCATGGTTCAGACATAAAAGGTGGCTTCGGCTACCACTTACAGATGGACCCGCGGCGCATTAGCTAGTTGGTGAGGTAACGGCTCACCAAGGCGACGATGCGTAGCCGACCTGAGAGGGTGATCGGCCACACTGGGACTGAGACACGGCCCAGACTCCTACGGGAGGCAGCAGTAGGGAATCTTCCGCAATGGACGRAAGTCTGACGGAGCAACGCCGCGTGAG…	27f 1492r/1525r
B-1-11	KT583344	Pham et al., 2015	Alcyonium digitatum	23–30			Kattegat, Baltic Sea (Germany)-site Baltic 1 (57°00.773N–11°34.835E), site Baltic 2 (56°58.805N–11°35.166E), and site Baltic 3 (56°42.041N–11°44.185E)		28 and 10		Firmicutes	Bacilli	Bacillales	Bacillaceae	Bacillus	sp.	99	Custom media, see reference for details	24-AUG-2015	GAACGCTGGCGGCGTGCCTAATACATGCAAGTCGAGCGGACAGATGGGAGCTTGCTCCCTGATGTTAGCGGCGGACGGGTGAGTAACACGTGGGTAACCTGCCTGTAAGACTGGGATAACTCCGGGAAACCGGGGCTAATACCGGATGGTTGTCTGAACCGCATGGTTCAGACATAAAAGGTGGCTTCGGCTACCACTTACAGATGGACCCGCGGCGCATTAGCTAGTTGGTGAGGTAACGGCTCACCAAGGCGACGATGCGTAGCCGACCTGAGAGGGTGATCGGCCACACTGGGACTGAGACACGGCCCAGACTCCTACGGGAGGCAGCAGTAGGGAATCTTCCGCAATGGACGAAAGTCTGACGGAGCAACGCCGCGTGAGTGATGAAGGTTTTCG…	27f 1492r/1525r
B-1-12	KT583345	Pham et al., 2015	Alcyonium digitatum	23–30			Kattegat, Baltic Sea (Germany)-site Baltic 1 (57°00.773N–11°34.835E), site Baltic 2 (56°58.805N–11°35.166E), and site Baltic 3 (56°42.041N–11°44.185E)		28 and 10		Firmicutes	Bacilli	Bacillales	Bacillaceae	Bacillus	sp.	99	Custom media, see reference for details	24-AUG-2015	AGAGCTTGCTCTCAAGAAGTTAGCGGCGGACGGGTGAGTAACACGTGGGTAACCTGCCCATAAGACTGGGATAACTCCGGGAAACCGGGGCTAATACCGGATAACATTTTGAACYGCATGGTTCGAAATTGAAAGGCGGCTTCGGCTGTCACTTATGGATGGACCCGCGTCGCATTAGCTAGTTGGTGAGGTAACGGCTCACCAAGGCAACGATGCGTAGCCGACCTGAGAGGGTGATCGGCCACACTGGGACTGAGACACGGCCCAGACTCCTACGGGAGGCAGCAGTAGGGAATCTTCCGCAATGGACGAAAGTCTGACGGAGCAACGCCGCGTGAGTGATGAAGGCTTTCGGGTCGTAAAACTCTGTTGTTAGGGAAGAACAAGTGCTAGTTGAAT…	27f 1492r/1525r
B-1-13	KT583346	Pham et al., 2015	Alcyonium digitatum	23–30			Kattegat, Baltic Sea (Germany)-site Baltic 1 (57°00.773N–11°34.835E), site Baltic 2 (56°58.805N–11°35.166E), and site Baltic 3 (56°42.041N–11°44.185E)		28 and 10		Firmicutes	Bacilli	Bacillales	Bacillaceae	Bacillus	sp.	100	Custom media, see reference for details	24-AUG-2015	TAGAGTTTGATCATGGCTCAGGACGAACGCTGGCGGCGTGCCTAATACATGCAAGTCGAGCGGACAGATGGGAGCTTGCTCCCTGATGTTAGCGGCGGACGGGTGAGTAACACGTGGGTAACCTGCCTGTAAGACTGGGATAACTCCGGGAAACCGGGGCTAATACCGGATGGTTGTCTGAACCGCATGGTTCAGACATAAAAGGTGGCTTCGGCTACCACTTACAGATGGACCCGCGGCGCATTAGCTAGTTGGTGAGGTAACGGCTCACCAAGGCGACGATGCGTAGCCGACCTGAGAGGGTGATCGGCCACACTGGGACTGAGACACGGCCCAGACTCCTACGGGAGGCAGCAGTAGGGAATCTTCCGCAATGGACGAAAGTCTGACGGAGCAACG…	27f 1492r/1525r
B-1-14	KT583347	Pham et al., 2015	Alcyonium digitatum	23–30			Kattegat, Baltic Sea (Germany)-site Baltic 1 (57°00.773N–11°34.835E), site Baltic 2 (56°58.805N–11°35.166E), and site Baltic 3 (56°42.041N–11°44.185E)		28 and 10		Firmicutes	Bacilli	Bacillales	Bacillaceae	Bacillus	sp.	100	Custom media, see reference for details	24-AUG-2015	TAGAGTTTGATCATGGCTCAGGACGAACGCTGGCGGCGTGCCTAATACATGCAAGTCGAGCGGACAGATGGGAGCTTGCTCCCTGATGTTAGCGGCGGACGGGTGAGTAACACGTGGGTAACCTGCCTGTAAGACTGGGATAACTCCGGGAAACCGGGGCTAATACCGGATGGTTGTCTGAACCGCATGGTTCAGACATAAAAGGTGGCTTCGGCTACCACTTACAGATGGACCCGCGGCGCATTAGCTAGTTGGTGAGGTAACGGCTCACCAAGGCGACGATGCGTAGCCGACCTGAGAGGGTGATCGGCCACACTGGGACTGAGACACGGCCCAGACTCCTACGGGAGGCAGCAGTAGGGAATCTTCCGCAATGGACGAAAGTCTGACGGAGCAACG…	27f 1492r/1525r
B-1-15	KT583348	Pham et al., 2015	Alcyonium digitatum	23–30			Kattegat, Baltic Sea (Germany)-site Baltic 1 (57°00.773N–11°34.835E), site Baltic 2 (56°58.805N–11°35.166E), and site Baltic 3 (56°42.041N–11°44.185E)		28 and 10		Firmicutes	Bacilli	Bacillales	Bacillaceae	Bacillus	sp.	100	Custom media, see reference for details	24-AUG-2015	TCAATCATAAAAGGTGGCTTTTAGCTACCACTTACAGATGGACCCGCGGCGCATTAGCTAGTTGGTGAGGTAACGGCTCACCAAGGCGACGATGCGTAGCCGACCTGAGAGGGTGATCGGCCACACTGGGACTGAGACACGGCCCAGACTCCTACGGGAGGCAGCAGTAGGGAATCTTCCGCAATGGACGAAAGTCTGACGGAGCAACGCCGCGTGAGTGATGAAGGTTTTCGGATCGTAAAACTCTGTTGTTAGGGAAGAACAAGTACCGTTCGAATAGGGCGGCACCTTGACGGTACCTAACCAGAAAGCCACGGCTAACTACGTGCCAGCAGCCGCGGTAATACGTAGGTGGCAAGCGTTGTCCGGAATTATTGGGCGTAAAGCGCGCGCAGGCGG…	27f 1492r/1525r
B-1-16	KT583349	Pham et al., 2015	Alcyonium digitatum	23–30			Kattegat, Baltic Sea (Germany)-site Baltic 1 (57°00.773N–11°34.835E), site Baltic 2 (56°58.805N–11°35.166E), and site Baltic 3 (56°42.041N–11°44.185E)		28 and 10		Firmicutes	Bacilli	Bacillales	Bacillaceae	Bacillus	sp.	100	Custom media, see reference for details	24-AUG-2015	TTCAATCATAAAAGGTGGCTTTTAGCTACCACTTACAGATGGACCCGCGGCGCATTAGCTAGTTGGTGAGGTAACGGCTCACCAAGGCGACGATGCGTAGCCGACCTGAGAGGGTGATCGGCCACACTGGGACTGAGACACGGCCCAGACTCCTACGGGAGGCAGCAGTAGGGAATCTTCCGCAATGGACGAAAGTCTGACGGAGCAACGCCGCGTGAGTGATGAAGGTTTTCGGATCGTAAAACTCTGTTGTTAGGGAAGAACAAGTACCGTTCGAATAGGGCGGCACCTTGACGGTACCTAACCAGAAAGCCACGGCTAACTACGTGCCAGCAGCCGCGGTAATACGTAGGTGGCAAGCGTTGTCCGGAATTATTGGGCGTAAAGCGCGCGCAGGCG…	27f 1492r/1525r
B-1-24	KT583353	Pham et al., 2015	Alcyonium digitatum	23–30			Kattegat, Baltic Sea (Germany)-site Baltic 1 (57°00.773N–11°34.835E), site Baltic 2 (56°58.805N–11°35.166E), and site Baltic 3 (56°42.041N–11°44.185E)		28 and 10		Firmicutes	Bacilli	Bacillales	Bacillaceae	Bacillus	sp.	100	Custom media, see reference for details	24-AUG-2015	AGAGTTTGATCATGGCTCAGGATGAACGCTGGCGGCGTGCCTAATACATGCAAGTCGAGCGAATGGATTGAGAGCTTGCTCTCAAGAAGTTAGCGGCGGACGGGTGAGTAACACGTGGGTAACCTGCCCATAAGACTGGGATAACTCCGGGAAACCGGGGCTAATACCGGATAACATTTTGAACTGCATGGTTCGAAATTGAAAGGCGGCTTCGGCTGTCACTTATGGATGGACCCGCGTCGCATTAGCTAGTTGGTGAGGTAACGGCTCACCAAGGCAACGATGCGTAGCCGACCTGAGAGGGTGATCGGCCACACTGGGACTGAGACACGGCCCAGACTCCTACGGGAGGCAGCAGTAGGGAATCTTCCGCAATGGACGAAAGTCTGACGGAGCAAC…	27f 1492r/1525r
B-1-25	KT583354	Pham et al., 2015	Alcyonium digitatum	23–30			Kattegat, Baltic Sea (Germany)-site Baltic 1 (57°00.773N–11°34.835E), site Baltic 2 (56°58.805N–11°35.166E), and site Baltic 3 (56°42.041N–11°44.185E)		28 and 10		Firmicutes	Bacilli	Bacillales	Bacillaceae	Bacillus	sp.	100	Custom media, see reference for details	24-AUG-2015	TCATGGCTCAGGATGAACGCTGGCGGCGTGCCTAATACATGCAAGTCGAGCGAATGGATTGAGAGCTTGCTCTCAAGAAGTTAGCGGCGGACGGGTGAGTAACACGTGGGTAACCTGCCCATAAGACTGGGATAACTCCGGGAAACCGGGGCTAATACCGGATAACATTTTGAACTGCATGGTTCGAAATTGAAAGGCGGCTTCGGCTGTCACTTATGGATGGACCCGCGTCGCATTAGCTAGTTGGTGAGGTAACGGCTCACCAAGGCAACGATGCGTAGCCGACCTGAGAGGGTGATCGGCCACACTGGGACTGAGACACGGCCCAGACTCCTACGGGAGGCAGCAGTAGGGAATCTTCCGCAATGGACGAAAGTCTGACGGAGCAACGCCGCGTGA…	27f 1492r/1525r
B-1-26	KT583355	Pham et al., 2015	Alcyonium digitatum	23–30			Kattegat, Baltic Sea (Germany)-site Baltic 1 (57°00.773N–11°34.835E), site Baltic 2 (56°58.805N–11°35.166E), and site Baltic 3 (56°42.041N–11°44.185E)		28 and 10		Firmicutes	Bacilli	Bacillales	Bacillaceae	Bacillus	sp.	100	Custom media, see reference for details	24-AUG-2015	TTCGGCTGTCACTTATGGATGGACCCGCGTCGCATTAGCTAGTTGGTGAGGTAACGGCTCACCAAGGCAACGATGCGTAGCCGACCTGAGAGGGTGATCGGCCACACTGGGACTGAGACACGGCCCAGACTCCTACGGGAGGCAGCAGTAGGGAATCTTCCGCAATGGACGAAAGTCTGACGGAGCAACGCCGCGTGAGTGATGAAGGCTTTCGGGTCGTAAAACTCTGTTGTTAGGGAAGAACAAGTGCTAGTTGAATAAGCTGGCACCTTGACGGTACCTAACCAGAAAGCCACGGCTAACTACGTGCCAGCAGCCGCGGTAATACGTAGGTGGCAAGCGTTATCCGGAATTATTGGGCGTAAAGCGCGCGCAGGTGGTTTCTTAAGTCTGATGTGA…	27f 1492r/1525r
B-1-27	KT583356	Pham et al., 2015	Alcyonium digitatum	23–30			Kattegat, Baltic Sea (Germany)-site Baltic 1 (57°00.773N–11°34.835E), site Baltic 2 (56°58.805N–11°35.166E), and site Baltic 3 (56°42.041N–11°44.185E)		28 and 10		Firmicutes	Bacilli	Bacillales	Bacillaceae	Bacillus	sp.	99	Custom media, see reference for details	24-AUG-2015	TTGATCATGGCTCAGGACGAACGCTGGCGGCGTGCCTAATACATGCAAGTCGAGCGGACAGATGGGAGCTTGCTCCCTGATGTTAGCGGCGGACGGGTGAGTAACACGTGGGTAACCTGCCTGTAAGACTGGGATAACTCCGGGAAACCGGGGCTAATACCGGATGGTTGTCTGAACCGCATGGTTCAGACATAAAAGGTGGCTTCGGCTACCACTTACAGATGGACCCGCGGCGCATTAGCTAGTTGGTGAGGTAACGGCTCACCAAGGCGACGATGCGTAGCCGACCTGAGAGGGTGATCGGCCACACTGGGACTGAGACACGGCCCAGACTCCTACGGGAGGCAGCAGTAGGGAATCTTCCGCAATGGACGAAAGTCTGACGGAGCAACGCCGCGT…	27f 1492r/1525r
B-1-28A	KT583357	Pham et al., 2015	Alcyonium digitatum	23–30			Kattegat, Baltic Sea (Germany)-site Baltic 1 (57°00.773N–11°34.835E), site Baltic 2 (56°58.805N–11°35.166E), and site Baltic 3 (56°42.041N–11°44.185E)		28 and 10		Firmicutes	Bacilli	Bacillales	Bacillaceae	Bacillus	sp.	100	Custom media, see reference for details	24-AUG-2015	TAGAGTTTGATCATGGCTCAGGACGAACGCTGGCGGCGTGCCTAATACATGCAAGTCGAGCGGACAGATGGGAGCTTGCTCCCTGATGTTAGCGGCGGACGGGTGAGTAACACGTGGGTAACCTGCCTGTAAGACTGGGATAACTCCGGGAAACCGGGGCTAATACCGGATGGTTGTTTGAACCGCATGGTTCAGACATAAAAGGTGGCTTCGGCTACCACTTACAGATGGACCCGCGGCGCATTAGCTAGTTGGTGAGGTAACGGCTCACCAAGGCGACGATGCGTAGCCGACCTGAGAGGGTGATCGGCCACACTGGGACTGAGACACGGCCCAGACTCCTACGGGAGGCAGCAGTAGGGAATCTTCCGCAATGGACGAAAGTCTGACGGAGCAACG…	27f 1492r/1525r
B-1-28B	KT583358	Pham et al., 2015	Alcyonium digitatum	23–30			Kattegat, Baltic Sea (Germany)-site Baltic 1 (57°00.773N–11°34.835E), site Baltic 2 (56°58.805N–11°35.166E), and site Baltic 3 (56°42.041N–11°44.185E)		28 and 10		Firmicutes	Bacilli	Bacillales	Bacillaceae	Bacillus	sp.	100	Custom media, see reference for details	24-AUG-2015	GAGTTTGATCATGGCTCAGGACGAACGCTGGCGGCGTGCCTAATACATGCAAGTCGAGCGGACAGATGGGAGCTTGCTCCCTGATGTTAGCGGCGGACGGGTGAGTAACACGTGGGTAACCTGCCTGTAAGACTGGGATAACTCCGGGAAACCGGGGCTAATACCGGATGGTTGTTTGAACCGCATGGTTCAGACATAAAAGGTGGCTTCGGCTACCACTTACAGATGGACCCGCGGCGCATTAGCTAGTTGGTGAGGTAACGGCTCACCAAGGCGACGATGCGTAGCCGACCTGAGAGGGTGATCGGCCACACTGGGACTGAGACACGGCCCAGACTCCTACGGGAGGCAGCAGTAGGGAATCTTCCGCAATGGACGAAAGTCTGACGGAGCAACGCC…	27f 1492r/1525r
B-1-29A	KT583359	Pham et al., 2015	Alcyonium digitatum	23–30			Kattegat, Baltic Sea (Germany)-site Baltic 1 (57°00.773N–11°34.835E), site Baltic 2 (56°58.805N–11°35.166E), and site Baltic 3 (56°42.041N–11°44.185E)		28 and 10		Firmicutes	Bacilli	Bacillales	Bacillaceae	Bacillus	sp.	99	Custom media, see reference for details	24-AUG-2015	AGAGTTTGATCATGGCTCAGGACGAACGCTGGCGGCGTGCCTAATACATGCAAGTCGAGCGGACAGATGGGAGCTTGCTCCCTGATGTTAGCGGCGGACGGGTGAGTAACACGTGGGTAACCTGCCTGTAAGACTGGGATAACTCCGGGAAACCGGGGCTAATACCGGATGCTTGATTGAACCGCATGGTTCAATTATAAAAGGTGGCTTTTAGCTACCACTTACAGATGGACCCGCGGCGCATTAGCTAGTTGGTGAGGTAACGGCTCACCAAGGCRACGATGCGTAGCCGACCTGAGAGGGTGATCGGCCACACTGGGACTGAGACACGGCCCAGACTCCTACGGGAGGCAGCAGTAGGGAATCTTCCGCAATGGACGAAAGTCTGACGGAGCAACG…	27f 1492r/1525r
B-1-29B	KT583360	Pham et al., 2015	Alcyonium digitatum	23–30			Kattegat, Baltic Sea (Germany)-site Baltic 1 (57°00.773N–11°34.835E), site Baltic 2 (56°58.805N–11°35.166E), and site Baltic 3 (56°42.041N–11°44.185E)		28 and 10		Firmicutes	Bacilli	Bacillales	Bacillaceae	Bacillus	sp.	99	Custom media, see reference for details	24-AUG-2015	GATCATGGCTCAGGACGAACGCTGGCGGCGTGCCTAATACATGCAAGTCGAGCGGACAGATGGGAGCTTGCTCCCTGATGTTAGCGGCGGACGGGTGAGTAACACGTGGGTAACCTGCCTGTAAGACTGGGATAACTCCGGGAAACCGGGGCTAATACCGGATGCTTGATTGAACCGCATGGTTCAATTATAAAAGGTGGCTTTTAGCTACCACTTACAGATGGACCCGCGGCGCATTAGCTAGTTGGTGAGGTAACGGCTCACCAAGGCRACGATGCGTAGCCGACCTGAGAGGGTGATCGGCCACACTGGGACTGAGACACGGCCCAGACTCCTACGGGAGGCAGCAGTAGGGAATCTTCCGCAATGGACGAAAGTCTGACGGAGCAACGCCGCGTG…	27f 1492r/1525r
B-1-30	KT583361	Pham et al., 2015	Alcyonium digitatum	23–30			Kattegat, Baltic Sea (Germany)-site Baltic 1 (57°00.773N–11°34.835E), site Baltic 2 (56°58.805N–11°35.166E), and site Baltic 3 (56°42.041N–11°44.185E)		28 and 10		Firmicutes	Bacilli	Bacillales	Bacillaceae	Bacillus	sp.	100	Custom media, see reference for details	24-AUG-2015	AGAGTTTGATCATGGCTCAGGACGAACGCTGGCGGCGTGCCTAATACATGCAAGTCGAGCGGACAGATGGGAGCTTGCTCCCTGATGTTAGCGGCGGACGGGTGAGTAACACGTGGGTAACCTGCCTGTAAGACTGGGATAACTCCGGGAAACCGGGGCTAATACCGGATGGTTGTTTGAACCGCATGGTTCAGACATAAAAGGTGGCTTCGGCTACCACTTACAGATGGACCCGCGGCGCATTAGCTAGTTGGTGAGGTAACGGCTCACCAAGGCGACGATGCGTAGCCGACCTGAGAGGGTGATCGGCCACACTGGGACTGAGACACGGCCCAGACTCCTACGGGAGGCAGCAGTAGGGAATCTTCCGCAATGGACGAAAGTCTGACGGAGCAACGC…	27f 1492r/1525r
B-1-31	KT583362	Pham et al., 2015	Alcyonium digitatum	23–30			Kattegat, Baltic Sea (Germany)-site Baltic 1 (57°00.773N–11°34.835E), site Baltic 2 (56°58.805N–11°35.166E), and site Baltic 3 (56°42.041N–11°44.185E)		28 and 10		Firmicutes	Bacilli	Bacillales	Bacillaceae	Bacillus	sp.	99	Custom media, see reference for details	24-AUG-2015	TTGATCATGGCTCAGGACGAACGCTGGCGGCGTGCCTAATACATGCAAGTCGAGCGGACAGATGGGAGCTTGCTCCCTGATGTTAGCGGCGGACGGGTGAGTAACACGTGGGTAACCTGCCTGTAAGACTGGGATAACTCCGGGAAACCGGGGCTAATACCGGATGGTTGTCTGAACCGCATGGTTCAGACATAAAAGGTGGCTTCGGCTACCACTTACAGATGGACCCGCGGCGCATTAGCTAGTTGGTGAGGTAACGGCTCACCAAGGCGACGATGCGTAGCCGACCTGAGAGGGTGATCGGCCACACTGGGACTGAGACACGGCCCAGACTCCTACGGGAGGCAGCAGTAGGGAATCTTCCGCAATGGACGAAAGTCTGACGGAGCAACGCCGCGT…	27f 1492r/1525r
B-1-33	KT583363	Pham et al., 2015	Alcyonium digitatum	23–30			Kattegat, Baltic Sea (Germany)-site Baltic 1 (57°00.773N–11°34.835E), site Baltic 2 (56°58.805N–11°35.166E), and site Baltic 3 (56°42.041N–11°44.185E)		28 and 10		Firmicutes	Bacilli	Bacillales	Bacillaceae	Bacillus	sp.	99	Custom media, see reference for details	24-AUG-2015	GAGTTTGATCATGGCTCAGGACGAACGCTGGCGGCGTGCCTAATACATGCAAGTCGAGCGAACAGAAGGGAGCTTGCTCCCGGATGTTAGCGGCGGACGGGTGAGTAACACGTGGGTAACCTGCCTGTAAGACTGGGATAACTCCGGGAAACCGGAGCTAATACCGGATAGTTCCTTGAACCGCATGGTTCAAGGATGAAAGACGGTTTCGGCTGTCACTTACAGATGGACCCGCGGCGCATTAGCTAGTTGGTGGGGTAATGGCTCACCAAGGCGACGATGCGTAGCCGACCTGAGAGGGTGATCGGCCACACTGGGACTGAGACACGGCCCAGACTCCTACGGGAGGCAGCAGTAGGGAATCTTCCGCAATGGACGAAAGTCTGACGGAGCAACGCC…	27f 1492r/1525r
B-1-34	KT583364	Pham et al., 2015	Alcyonium digitatum	23–30			Kattegat, Baltic Sea (Germany)-site Baltic 1 (57°00.773N–11°34.835E), site Baltic 2 (56°58.805N–11°35.166E), and site Baltic 3 (56°42.041N–11°44.185E)		28 and 10		Firmicutes	Bacilli	Bacillales	Bacillaceae	Bacillus	sp.	99	Custom media, see reference for details	24-AUG-2015	ATCATGGCTCAGGATGAACGCTGGCGGCGTGCCTAATACATGCAAGTCGAGCGAATGGATTGAGAGCTTGCTCTCAAGAAGTTAGCGGCGGACGGGTGAGTAACACGTGGGTAACCTGCCCATAAGACTGGGATAACTCCGGGAAACCGGGGCTAATACCGGATAACATTTTGAACYGCATGGTTCGAAATTGAAAGGCGGCTTCGGCTGTCACTTATGGATGGACCCGCGTCGCATTAGCTAGTTGGTGAGGTAACGGCTCACCAAGGCAACGATGCGTAGCCGACCTGAGAGGGTGATCGGCCACACTGGGACTGAGACACGGCCCAGACTCCTACGGGAGGCAGCAGTAGGGAATCTTCCGCAATGGACGAAAGTCTGACGGAGCAACGCCGCGTG…	27f 1492r/1525r
B-1-35	KT583365	Pham et al., 2015	Alcyonium digitatum	23–30			Kattegat, Baltic Sea (Germany)-site Baltic 1 (57°00.773N–11°34.835E), site Baltic 2 (56°58.805N–11°35.166E), and site Baltic 3 (56°42.041N–11°44.185E)		28 and 10		Firmicutes	Bacilli	Bacillales	Bacillaceae	Bacillus	sp.	99	Custom media, see reference for details	24-AUG-2015	CTCAAGAAGTTAGCGGCGGACGGGTGAGTAACACGTGGGTAACCTGCCCATAAGACTGGGATAACTCCGGGAAACCGGGGCTAATACCGGATAACATTTTGAACTGCATGGTTCGAAATTGAAAGGCGGCTTCGGCTGTCACTTATGGATGGACCCGCGTCGCATTAGCTAGTTGGTGAGGTAACGGCTCACCAAGGCAACGATGCGTAGCCGACCTGAGAGGGTGATCGGCCACACTGGGACTGAGACACGGCCCAGACTCCTACGGGAGGCAGCAGTAGGGAATCTTCCGCAATGGACGAAAGTCTGACGGAGCAACGCCGCGTGAGTGATGAAGGCTTTCGGGTCGTAAAACTCTGTTGTTAGGGAAGAACAAGTGCTAGTTGAATAAGCTGGCAC…	27f 1492r/1525r
B-1-36	KT583366	Pham et al., 2015	Alcyonium digitatum	23–30			Kattegat, Baltic Sea (Germany)-site Baltic 1 (57°00.773N–11°34.835E), site Baltic 2 (56°58.805N–11°35.166E), and site Baltic 3 (56°42.041N–11°44.185E)		28 and 10		Firmicutes	Bacilli	Bacillales	Bacillaceae	Bacillus	sp.	100	Custom media, see reference for details	24-AUG-2015	CAGGACGAACGCTGGCGGCGTGCCTAATACATGCAAGTCGAGCGAACAGAAGGGAGCTTGCTCCCGGATGTTAGCGGCGGACGGGTGAGTAACACGTGGGTAACCTGCCTGTAAGACTGGGATAACTCCGGGAAACCGGAGCTAATACCGGATAGTTCCTTGAACCGCATGGTTCAAGGATGAAAGACGGTTTCGGCTGTCACTTACAGATGGACCCGCGGCGCATTAGCTAGTTGGTGGGGTAATGGCTCACCAAGGCGACGATGCGTAGCCGACCTGAGAGGGTGATCGGCCACACTGGGACTGAGACACGGCCCAGACTCCTACGGGAGGCAGCAGTAGGGAATCTTCCGCAATGGACGAAAGTCTGACGGAGCAACGCCGCGTGAGTGATGAAGG…	27f 1492r/1525r
B-1-37	KT583367	Pham et al., 2015	Alcyonium digitatum	23–30			Kattegat, Baltic Sea (Germany)-site Baltic 1 (57°00.773N–11°34.835E), site Baltic 2 (56°58.805N–11°35.166E), and site Baltic 3 (56°42.041N–11°44.185E)		28 and 10		Firmicutes	Bacilli	Bacillales	Bacillaceae	Bacillus	sp.	99	Custom media, see reference for details	24-AUG-2015	TAGAGTTTGATCATGGCTCAGGACGAACGCTGGCGGCGTGCCTAATACATGCAAGTCGAGCGGACTTGATGGAGTGCTTGCACTCCTGAGAGTTAGCGGCGGACGGGTGAGTAACACGTAGGCAACCTGCCCTCGAGACTGGGATAACTACCGGAAACGGTAGCTAATACCGGATAATTTATTTCGCAGCATTGTGGAATAATGAAAGACGGAGCAATCTGTCACTTGGGGATGGGCCTGCGGCGCATTAGCTAGTTGGTGGGGTAATGGCTCACCAAGGCGACGATGCGTAGCCGACCTGAGAGGGTGAACGGCCACACTGGGACTGAGACACGGCCCAGACTCCTACGGGAGGCAGCAGTAGGGAATCTTCCGCAATGGGCGAAAGCCTGACGGAGC…	27f 1492r/1525r
B-1-38	KT583368	Pham et al., 2015	Alcyonium digitatum	23–30			Kattegat, Baltic Sea (Germany)-site Baltic 1 (57°00.773N–11°34.835E), site Baltic 2 (56°58.805N–11°35.166E), and site Baltic 3 (56°42.041N–11°44.185E)		28 and 10		Firmicutes	Bacilli	Bacillales	Bacillaceae	Bacillus	sp.	99	Custom media, see reference for details	24-AUG-2015	TCATGGCTCAGGACGAACGCTGGCGGCGTGCCTAATACATGCAAGTCGAGCGAATCAATGGGAGCTTGCTCCCTGAGATTAGCGGCGGACGGGTGAGTAACACGTGGGTAACCTGCCTGTAAGATTGGGATAACTCCGGGAAACCGGAGCTAATACCGGATAACATTTTGAACCGCATGGTTCGAAATTAAAAGATGGTTTCGGCTATCACTTACAGATGGACCCGCGGCGCATTAGCTAGTTGGTGAGGTAACGGCTCACCAAGGCGACGATGCGTAGCCGACCTGAGAGGGTGATCGGCCACACTGGGACTGAGACACGGCCCAGACTCCTACGGGAGGCAGCAGTAGGGAATCTTCCGCAATGGACGAAAGTCTGACGGAGCAACGCCGCGTGAAC…	27f 1492r/1525r
B-1-40	KT583369	Pham et al., 2015	Alcyonium digitatum	23–30			Kattegat, Baltic Sea (Germany)-site Baltic 1 (57°00.773N–11°34.835E), site Baltic 2 (56°58.805N–11°35.166E), and site Baltic 3 (56°42.041N–11°44.185E)		28 and 10		Firmicutes	Bacilli	Bacillales	Bacillaceae	Bacillus	sp.	99	Custom media, see reference for details	24-AUG-2015	ATCATGGCTCAGGACGAACGCTGGCGGCGTGCCTAATACATGCAAGTCGAGCGGACAGATGGGAGCTTGCTCCCTGATGTTAGCGGCGGACGGGTGAGTAACACGTGGGTAACCTGCCTGTAAGACTGGGATAACTCCGGGAAACCGGGGCTAATACCGGATGCTTGATTGAACCGCATGGTTCAATTATAAAAGGTGGCTTTTAGCTACCACTTACAGATGGACCCGCGGCGCATTAGCTAGTTGGTGAGGTAACGGCTCACCAAGGCRACGATGCGTAGCCGACCTGAGAGGGTGATCGGCCACACTGGGACTGAGACACGGCCCAGACTCCTACGGGAGGCAGCAGTAGGGAATCTTCCGCAATGGACGAAAGTTCTGACGGAGCAACGCCGCGTG…	27f 1492r/1525r
B-1-41	KT583370	Pham et al., 2015	Alcyonium digitatum	23–30			Kattegat, Baltic Sea (Germany)-site Baltic 1 (57°00.773N–11°34.835E), site Baltic 2 (56°58.805N–11°35.166E), and site Baltic 3 (56°42.041N–11°44.185E)		28 and 10		Firmicutes	Bacilli	Bacillales	Bacillaceae	Bacillus	sp.	99	Custom media, see reference for details	24-AUG-2015	GAGTTTGATCATGGCTCAGGATGAACGCTGGCGGCGTGCCTAATACATGCAAGTCGAGCGAATGGATTGAGAGCTTGCTCTCAAGAAGTTAGCGGCGGACGGGTGAGTAACACGTGGGTAACCTGCCCATAAGACTGGGATAACTCCGGGAAACCGGGGCTAATACCGGATAACATTTTGAACTGCATGGTTCGAAATTGAAAGGCGGCTTCGGCTGTCACTTATGGATGGACCCGCGTCGCATTAGCTAGTTGGTGAGGTAACGGCTCACCAAGGCAACGATGCGTAGCCGACCTGAGAGGGTGATCGGCCACACTGGGACTGAGACACGGCCCAGACTCCTACGGGAGGCAGCAGTAGGGAATCTTCCGCAATGGACGAAAGTCTGACGGAGCAACG…	27f 1492r/1525r
B-1-42	KT583371	Pham et al., 2015	Alcyonium digitatum	23–30			Kattegat, Baltic Sea (Germany)-site Baltic 1 (57°00.773N–11°34.835E), site Baltic 2 (56°58.805N–11°35.166E), and site Baltic 3 (56°42.041N–11°44.185E)		28 and 10		Firmicutes	Bacilli	Bacillales	Bacillaceae	Lysinibacillus	sp.	99	Custom media, see reference for details	24-AUG-2015	TTTGATCATGGCTCAGGACGAACGCTGGCGGCGTGCCTAATACATGCAAGTCGAGCGAACAGAAAAGGAGCTTGCTCCTTTGACGTTAGCGGCGGACGGGTGAGTAACACGTGGGCAACCTACCCTATAGTTTGGGATAACTCCGGGAAACCGGGGCTAATACCGAATAATMTCTTTTGCTTCATGGCAARAGACTGAAAGACGGTTTCGGCTGTCGCTATAGGATGGGCCCGCGGCGCATTAGCTAGTTGGTGAGGTAACGGCTCACCAAGGCGACGATGCGTAGCCGACCTGAGAGGGTGATCGGCCACACTGGGACTGAGACACGGCCCAGACTCCTACGGGAGGCAGCAGTAGGGAATCTTCCACAATGGGCGAAAGCCTGATGGAGCAACGCCG…	27f 1492r/1525r
B-1-43	KT583372	Pham et al., 2015	Alcyonium digitatum	23–30			Kattegat, Baltic Sea (Germany)-site Baltic 1 (57°00.773N–11°34.835E), site Baltic 2 (56°58.805N–11°35.166E), and site Baltic 3 (56°42.041N–11°44.185E)		28 and 10		Firmicutes	Bacilli	Bacillales	Bacillaceae	Lysinibacillus	sp.	99	Custom media, see reference for details	24-AUG-2015	TTGATCATGGCTCAGGACGAACGCTGGCGGCGTGCCTAATACATGCAAGTCGAGCGAACAGAAAAGGAGCTTGCTCCTTTGACGTTAGCGGCGGACGGGTGAGTAACACGTGGGCAACCTACCCTATAGTTTGGGATAACTCCGGGAAACCGGGGCTAATACCGAATAATMTCTTTTGCTTCATGGCAAAAGACTGAAAGACGGTTTCGGCTGTCGCTATAGGATGGGCCCGCGGCGCATTAGCTAGTTGGTGAGGTAACGGCTCACCAAGGCGACGATGCGTAGCCGACCTGAGAGGGTGATCGGCCACACTGGGACTGAGACACGGCCCAGACTCCTACGGGAGGCAGCAGTAGGGAATCTTCCACAATGGGCGAAAGCCTGATGGAGCAACGCCGC…	27f 1492r/1525r
B-1-49	KT583375	Pham et al., 2015	Alcyonium digitatum	23–30			Kattegat, Baltic Sea (Germany)-site Baltic 1 (57°00.773N–11°34.835E), site Baltic 2 (56°58.805N–11°35.166E), and site Baltic 3 (56°42.041N–11°44.185E)		28 and 10		Firmicutes	Bacilli	Bacillales	Bacillaceae	Bacillus	sp.	99	Custom media, see reference for details	24-AUG-2015	AGTTTGATCATGGCTCAGGATGAACGCTGGCGGCGTGCCTAATACATGCAAGTCGAGCGAATGGATTGAGAGCTTGCTCTCAAGAAGTTAGCGGCGGACGGGTGAGTAACACGTGGGTAACCTGCCCATAAGACTGGGATAACTCCGGGAAACCGGGGCTAATACCGGATAACATTTTGAACYGCATGGTTCGAAATTGAAAGGCGGCTTCGGCTGTCACTTATGGATGGACCCGCGTCGCATTAGCTAGTTGGTGAGGTAACGGCTCACCAAGGCAACGATGCGTAGCCGACCTGAGAGGGTGATCGGCCACACTGGGACTGAGACACGGCCCAGACTCCTACGGGAGGCAGCAGTAGGGAATCTTCCGCAATGGACGAAAGTCTGACGGAGCAACGC…	27f 1492r/1525r
C-1-1	KT583376	Pham et al., 2015	Alcyonium digitatum	23–30			Kattegat, Baltic Sea (Germany)-site Baltic 1 (57°00.773N–11°34.835E), site Baltic 2 (56°58.805N–11°35.166E), and site Baltic 3 (56°42.041N–11°44.185E)		28 and 10		Firmicutes	Bacilli	Bacillales	Bacillaceae	Bacillus	sp.	99	Custom media, see reference for details	24-AUG-2015	TTGATCATGGCTCAGGACGAACGCTGGCGGCGTGCCTAATACATGCAAGTCGAGCGAATCAATGGGAGCTTGCTCCCTGAGATTAGCGGCGGACGGGTGAGTAACACGTGGGTAACCTGCCTGTAAGATTGGGATAACTCCGGGAAACCGGAGCTAATACCGGATAACATTTTGAACCGCATGGTTCGAAATTAAAAGATGGTTTCGGCTATCACTTACAGATGGACCCGCGGCGCATTAGCTAGTTGGTGAGGTAACGGCTCACCAAGGCRACGATGCGTAGCCGACCTGAGAGGGTGATCGGCCACACTGGGACTGAGACACGGCCCAGACTCCTACGGGAGGCAGCAGTAGGGAATCTTCCGCAATGGACGAAAGTCTGACGGAGCAACGCCGCGT…	27f 1492r/1525r
C-1-2	KT583377	Pham et al., 2015	Alcyonium digitatum	23–30			Kattegat, Baltic Sea (Germany)-site Baltic 1 (57°00.773N–11°34.835E), site Baltic 2 (56°58.805N–11°35.166E), and site Baltic 3 (56°42.041N–11°44.185E)		28 and 10		Firmicutes	Bacilli	Bacillales	Bacillaceae	Lysinibacillus	sp.	99	Custom media, see reference for details	24-AUG-2015	ATCATGGCTCAGGACGAACGCTGGCGGCGTGCCTAATACATGCAAGTCGAGCGAACAGAGAAGGAGCTTGCTCCTTTGACGTTAGCGGCGGACGGGTGAGTAACACGTGGGCAACCTACCTTATAGTTTGGGATAACTCCGGGAAACCGGGGCTAATACCGAATAATCTGTTTCACCTCATGGTGAAATATTGAAAGACGGTTTCGGCTGTCGCTATAGGATGGGCCCGCGGCGCATTAGCTAGTTGGTGAGGTAACGGCTCACCAAGGCGACGATGCGTAGCCGACCTGAGAGGGTGATCGGCCACACTGGGACTGAGACACGGCCCAGACTCCTACGGGAGGCAGCAGTAGGGAATCTTCCACAATGGGCGAAAGCCTGATGGAGCAACGCCGCGTG…	27f 1492r/1525r
C-1-3	KT583378	Pham et al., 2015	Alcyonium digitatum	23–30			Kattegat, Baltic Sea (Germany)-site Baltic 1 (57°00.773N–11°34.835E), site Baltic 2 (56°58.805N–11°35.166E), and site Baltic 3 (56°42.041N–11°44.185E)		28 and 10		Firmicutes	Bacilli	Bacillales	Bacillaceae	Bacillus	sp.	100	Custom media, see reference for details	24-AUG-2015	TCAATCATAAAAGGTGGCTTTTAGCTACCACTTACAGATGGACCCGCGGCGCATTAGCTAGTTGGTGAGGTAACGGCTCACCAAGGCGACGATGCGTAGCCGACCTGAGAGGGTGATCGGCCACACTGGGACTGAGACACGGCCCAGACTCCTACGGGAGGCAGCAGTAGGGAATCTTCCGCAATGGACGAAAGTCTGACGGAGCAACGCCGCGTGAGTGATGAAGGTTTTCGGATCGTAAAACTCTGTTGTTAGGGAAGAACAAGTACCGTTCGAATAGGGCGGCACCTTGACGGTACCTAACCAGAAAGCCACGGCTAACTACGTGCCAGCAGCCGCGGTAATACGTAGGTGGCAAGCGTTGTCCGGAATTATTGGGCGTAAAGCGCGCGCAGGCGG…	27f 1492r/1525r
C-1-4	KT583379	Pham et al., 2015	Alcyonium digitatum	23–30			Kattegat, Baltic Sea (Germany)-site Baltic 1 (57°00.773N–11°34.835E), site Baltic 2 (56°58.805N–11°35.166E), and site Baltic 3 (56°42.041N–11°44.185E)		28 and 10		Firmicutes	Bacilli	Bacillales	Bacillaceae	Lysinibacillus	sp.	99	Custom media, see reference for details	24-AUG-2015	ATCATGGCTCAGGACGAACGCTGGCGGCGTGCCTAATACATGCAAGTCGAGCGAACAGAGAAGGAGCTTGCTCCTTTGACGTTAGCGGCGGACGGGTGAGTAACACGTGGGCAACCTACCTTATAGTTTGGGATAACTCCGGGAAACCGGGGCTAATACCGAATAATCTGTTTCACCTCATGGTGAAATATTGAAAGACGGTTTCGGCTGTCGCTATAGGATGGGCCCGCGGCGCATTAGCTAGTTGGTGAGGTAACGGCTCACCAAGGCGACGATGCGTAGCCGACCTGAGAGGGTGATCGGCCACACTGGGACTGAGACACGGCCCAGACTCCTACGGGAGGCAGCAGTAGGGAATCTTCCACAATGGGCGAAAGCCTGATGGAGCAACGCCGCGTG…	27f 1492r/1525r
C-1-5(2015)	KT583380	Pham et al., 2015	Alcyonium digitatum	23–30			Kattegat, Baltic Sea (Germany)-site Baltic 1 (57°00.773N–11°34.835E), site Baltic 2 (56°58.805N–11°35.166E), and site Baltic 3 (56°42.041N–11°44.185E)		28 and 10		Firmicutes	Bacilli	Bacillales	Bacillaceae	Bacillus	sp.	99	Custom media, see reference for details	24-AUG-2015	TCAGGACGAACGCTGGCGGCGTGCCTAATACATGCAAGTCGAGCGGACAGATGGGAGCTTGCTCCCTGATGTTAGCGGCGGACGGGTGAGTAACACGTGGGTAACCTGCCTGTAAGACTGGGATAACTCCGGGAAACCGGGGCTAATACCGGATGGTTGTTTGAACCGCATGGTTCAGACATAAAAGGTGGCTTCGGCTACCACTTACAGATGGACCCGCGGCGCATTAGCTAGTTGGTGAGGTAACGGCTCACCAAGGCGACGATGCGTAGCCGACCTGAGAGGGTGATCGGCCACACTGGGACTGAGACACGGCCCAGACTCCTACGGGAGGCAGCAGTAGGGAATCTTCCGCAATGGACGAAAGTCTGACGGAGCAACGCCGCGTGAGTGATGAAG…	27f 1492r/1525r
C-1-7(2015)	KT583381	Pham et al., 2015	Alcyonium digitatum	23–30			Kattegat, Baltic Sea (Germany)-site Baltic 1 (57°00.773N–11°34.835E), site Baltic 2 (56°58.805N–11°35.166E), and site Baltic 3 (56°42.041N–11°44.185E)		28 and 10		Firmicutes	Bacilli	Bacillales	Bacillaceae	Bacillus	sp.	100	Custom media, see reference for details	24-AUG-2015	GATCATGGCTCAGGACGAACGCTGGCGGCGTGCCTAATACATGCAAGTCGAGCGGACAGATGGGAGCTTGCTCCCTGATGTTAGCGGCGGACGGGTGAGTAACACGTGGGTAACCTGCCTGTAAGACTGGGATAACTCCGGGAAACCGGGGCTAATACCGGATGGTTGTCTGAACCGCATGGTTCAGACATAAAAGGTGGCTTCGGCTACCACTTACAGATGGACCCGCGGCGCATTAGCTAGTTGGTGAGGTAACGGCTCACCAAGGCGACGATGCGTAGCCGACCTGAGAGGGTGATCGGCCACACTGGGACTGAGACACGGCCCAGACTCCTACGGGAGGCAGCAGTAGGGAATCTTCCGCAATGGACGAAAGTCTGACGGAGCAACGCCGCGTGA…	27f 1492r/1525r
C-1-9	KT583382	Pham et al., 2015	Alcyonium digitatum	23–30			Kattegat, Baltic Sea (Germany)-site Baltic 1 (57°00.773N–11°34.835E), site Baltic 2 (56°58.805N–11°35.166E), and site Baltic 3 (56°42.041N–11°44.185E)		28 and 10		Firmicutes	Bacilli	Bacillales	Bacillaceae	Bacillus	sp.	100	Custom media, see reference for details	24-AUG-2015	ACGCTGGCGGCGTGCCTAATACATGCAAGTCGAGCGGACAGATGGGAGCTTGCTCCCTGATGTTAGCGGCGGACGGGTGAGTAACACGTGGGTAACCTGCCTGTAAGACTGGGATAACTCCGGGAAACCGGGGCTAATACCGGATGGTTGTTTGAACCGCATGGTTCAGACATAAAAGGTGGCTTCGGCTACCACTTACAGATGGACCCGCGGCGCATTAGCTAGTTGGTGAGGTAACGGCTCACCAAGGCGACGATGCGTAGCCGACCTGAGAGGGTGATCGGCCACACTGGGACTGAGACACGGCCCAGACTCCTACGGGAGGCAGCAGTAGGGAATCTTCCGCAATGGACGAAAGTCTGACGGAGCAACGCCGCGTGAGTGATGAAGGTTTTCGGA…	27f 1492r/1525r
C-1-10	KT583383	Pham et al., 2015	Alcyonium digitatum	23–30			Kattegat, Baltic Sea (Germany)-site Baltic 1 (57°00.773N–11°34.835E), site Baltic 2 (56°58.805N–11°35.166E), and site Baltic 3 (56°42.041N–11°44.185E)		28 and 10		Firmicutes	Bacilli	Bacillales	Bacillaceae	Bacillus	sp.	100	Custom media, see reference for details	24-AUG-2015	ATCATGGCTCAGGACGAACGCTGGCGGCGTGCCTAATACATGCAAGTCGAGCGGACAGATGGGAGCTTGCTCCCTGATGTTAGCGGCGGACGGGTGAGTAACACGTGGGTAACCTGCCTGTAAGACTGGGATAACTCCGGGAAACCGGGGCTAATACCGGATGGTTGTTTGAACCGCATGGTTCAGACATAAAAGGTGGCTTCGGCTACCACTTACAGATGGACCCGCGGCGCATTAGCTAGTTGGTGAGGTAACGGCTCACCAAGGCGACGATGCGTAGCCGACCTGAGAGGGTGATCGGCCACACTGGGACTGAGACACGGCCCAGACTCCTACGGGAGGCAGCAGTAGGGAATCTTCCGCAATGGACGAAAGTCTGACGGAGCAACGCCGCGTGAG…	27f 1492r/1525r
C-1-11	KT583384	Pham et al., 2015	Alcyonium digitatum	23–30			Kattegat, Baltic Sea (Germany)-site Baltic 1 (57°00.773N–11°34.835E), site Baltic 2 (56°58.805N–11°35.166E), and site Baltic 3 (56°42.041N–11°44.185E)		28 and 10		Firmicutes	Bacilli	Bacillales	Bacillaceae	Bacillus	sp.	99	Custom media, see reference for details	24-AUG-2015	GATCATGGCTCAGGACGAACGCTGGCGGCGTGCCTAATACATGCAAGTCGAGCGGACAGATGGGAGCTTGCTCCCTGATGTTAGCGGCGGACGGGTGAGTAACACGTGGGTAACCTGCCTGTAAGACTGGGATAACTCCGGGAAACCGGGGCTAATACCGGATGGTTGTTTGAACCGCATGGTTCAGACATAAAAGGTGGCTTCGGCTACCACTTACAGATGGACCCGCGGCGCATTAGCTAGTTGGTGAGGTAACGGCTCACCAAGGCGACGATGCGTAGCCGACCTGAGAGGGTGATCGGCCACACTGGGACTGAGACACGGCCCAGACTCCTACGGGAGGCAGCAGTAGGGAATCTTCCGCAATGGACGAAAGTCTGACGGAGCAACGCCGCGTGA…	27f 1492r/1525r
C-1-12	KT583385	Pham et al., 2015	Alcyonium digitatum	23–30			Kattegat, Baltic Sea (Germany)-site Baltic 1 (57°00.773N–11°34.835E), site Baltic 2 (56°58.805N–11°35.166E), and site Baltic 3 (56°42.041N–11°44.185E)		28 and 10		Firmicutes	Bacilli	Bacillales	Bacillaceae	Bacillus	sp.	99	Custom media, see reference for details	24-AUG-2015	GATCATGGCTCAGGACGAACGCTGGCGGCGTGCCTAATACATGCAAGTCGAGCGGACAGATGGGAGCTTGCTCCCTGATGTTAGCGGCGGACGGGTGAGTAACACGTGGGTAACCTGCCTGTAAGACTGGGATAACTCCGGGAAACCGGGGCTAATACCGGATGGTTGTTTGAACCGCATGGTTCAGACATAAAAGGTGGCTTCGGCTACCACTTACAGATGGACCCGCGGCGCATTAGCTAGTTGGTGAGGTAACGGCTCACCAAGGCGACGATGCGTAGCCGACCTGAGAGGGTGATCGGCCACACTGGGACTGAGACACGGCCCAGACTCCTACGGGAGGCAGCAGTAGGGAATCTTCCGCAATGGACGAAAGTCTGACGGAGCAACGCCGCGTGA…	27f 1492r/1525r
C-1-13	KT583386	Pham et al., 2015	Alcyonium digitatum	23–30			Kattegat, Baltic Sea (Germany)-site Baltic 1 (57°00.773N–11°34.835E), site Baltic 2 (56°58.805N–11°35.166E), and site Baltic 3 (56°42.041N–11°44.185E)		28 and 10		Firmicutes	Bacilli	Bacillales	Bacillaceae	Bacillus	sp.	99	Custom media, see reference for details	24-AUG-2015	AGTTTGATCATGGCTCAGGACGAACGCTGGCGGCGTGCCTAATACATGCAAGTCGAGCGGACAGATGGGAGCTTGCTCCCTGATGTTAGCGGCGGACGGGTGAGTAACACGTGGGTAACCTGCCTGTAAGACTGGGATAACTCCGGGAAACCGGGGCTAATACCGGATGGTTGTTTGAACCGCATGGTTCAGACATAAAAGGTGGCTTCGGCTACCACTTACAGATGGACCCGCGGCGCATTAGCTAGTTGGTGAGGTAACGGCTCACCAAGGCGACGATGCGTAGCCGACCTGAGAGGGTGATCGGCCACACTGGGACTGAGACACGGCCCAGACTCCTACGGGAGGCAGCAGTAGGGAATCTTCCGCAATGGACGAAAGTCTGACGGAGCAACGCCG…	27f 1492r/1525r
C-1-15	KT583387	Pham et al., 2015	Alcyonium digitatum	23–30			Kattegat, Baltic Sea (Germany)-site Baltic 1 (57°00.773N–11°34.835E), site Baltic 2 (56°58.805N–11°35.166E), and site Baltic 3 (56°42.041N–11°44.185E)		28 and 10		Firmicutes	Bacilli	Bacillales	Bacillaceae	Bacillus	sp.	99	Custom media, see reference for details	24-AUG-2015	TTGATCATGGCTCAGGACGAACGCTGGCGGCGTGCCTAATACATGCAAGTCGAGCGGACAGAAGGGAGCTTGCTCCCGGATGTTAGCGGCGGACGGGTGAGTAACACGTGGGTAACCTGCCTGTAAGACTGGGATAACTCCGGGAAACCGGAGCTAATACCGGATAGTTCCTTGAACCGCATGGTTCAAGGATGAAAGACGGTTTCGGCTGTCACTTACAGATGGACCCGCGGCGCATTAGCTAGTTGGTGGGGTAATGGCTCACCAAGGCGACGATGCGTAGCCGACCTGAGAGGGTGATCGGCCACACTGGGACTGAGACACGGCCCAGACTCCTACGGGAGGCAGCAGTAGGGAATCTTCCGCAATGGACGAAAGTCTGACGGAGCAACGCCGCGT…	27f 1492r/1525r
C-1-16	KT583388	Pham et al., 2015	Alcyonium digitatum	23–30			Kattegat, Baltic Sea (Germany)-site Baltic 1 (57°00.773N–11°34.835E), site Baltic 2 (56°58.805N–11°35.166E), and site Baltic 3 (56°42.041N–11°44.185E)		28 and 10		Firmicutes	Bacilli	Bacillales	Bacillaceae	Bacillus	sp.	99	Custom media, see reference for details	24-AUG-2015	ATCATGGCTCAGGACGAACGCTGGCGGCGTGCCTAATACATGCAAGTCGAGCGAACAGAAGGGAGCTTGCTCCCGGATGTTAGCGGCGGACGGGTGAGTAACACGTGGGTAACCTGCCTGTAAGACTGGGATAACTCCGGGAAACCGGAGCTAATACCGGATAGTTCCTTGAACCGCATGGTTCAAGGATGAAAGACGGTTTCGGCTGTCACTTACAGATGGACCCGCGGCGCATTAGCTAGTTGGTGGGGTAATGGCTCACCAAGGCGACGATGCGTAGCCGACCTGAGAGGGTGATCGGCCACACTGGGACTGAGACACGGCCCAGACTCCTACGGGAGGCAGCAGTAGGGAATCTTCCGCAATGGACGAAAGTCTGACGGAGCAACGCCGCGTGAG…	27f 1492r/1525r
C-1-17	KT583389	Pham et al., 2015	Alcyonium digitatum	23–30			Kattegat, Baltic Sea (Germany)-site Baltic 1 (57°00.773N–11°34.835E), site Baltic 2 (56°58.805N–11°35.166E), and site Baltic 3 (56°42.041N–11°44.185E)		28 and 10		Firmicutes	Bacilli	Bacillales	Bacillaceae	Bacillus	sp.	99	Custom media, see reference for details	24-AUG-2015	ACATGCAAGTCGAGCGGACAGATGGGAGCTTGCTCCCTGATGTTAGCGGCGGACGGGTGAGTAACACGTGGGTAACCTGCCTGTAAGACTGGGATAACTCCGGGAAACCGGGGCTAATACCGGATGGTTGTTTGAACCGCATGGTTCAGACATAAAAGGTGGCTTCGGCTACCACTTACAGATGGACCCGCGGCGCATTAGCTAGTTGGTGAGGTAACGGCTCACCAAGGCGACGATGCGTAGCCGACCTGAGAGGGTGATCGGCCACACTGGGACTGAGACACGGCCCAGACTCCTACGGGAGGCAGCAGTAGGGAATCTTCCGCAATGGACGAAAGTCTGACGGAGCAACGCCGCGTGAGTGATGAAGGTTTTCGGATCGTAAAGCTCTGTTGTTAG…	27f 1492r/1525r
[truncated: 2,476 more rows]
