# Supplementary material for: Insights into the cultured bacterial fraction of corals
Source: Research Square preprint supplement (doi:10.21203/rs.3.rs-105866/v1), 2020-11-21
Supplement: Supplementary file 2 [file 7a7ae5a20ee03100c438dbb7.xlsx]

## Sheet: Sheet1
Key, core or fuctionally important microbes	Classification	Proposed function	Culturable	Reference
Acinetobacter	core		Y	Hernandez-Agreda et al. (2018); Leite et al. (2018)
Alcaligenes	core symbiotic		Y	Ainsworth et al. (2015); Bernasconi et al. (2019)
Alteromonas	core	Degrade algal polysaccharides and remove reactive oxygen species (ROS)	Y	Hernandez-Agreda et al. (2016, 2018); Bernasconi et al. (2019)
Arthrobacter	core		Y	Bayer et al. (2013); Sweet and Bulling (2017)
Aurantimonas coralicida	core symbiotic		Y	Ainsworth et al. (2015)
Bacilus	core		Y	Bernasconi et al. (2019)
Bdellovibrio	obligate periplasmic predators		N	Welsh and Vega Thurber, (2016)
Brevundimonas	core symbiotic		Y	Ainsworth et al. (2015)
Cloacibacterium	core		N	Hernandez-Agreda et al. (2018)
Cobetia marina	?		Y	Rosado et al. (2019)
Corynebacterium maris	core		Y	Hernandez-Agreda et al. (2016, 2018)
Coxiella	core		N	Hester et al. (2016)
Elizabethkingia	core		N	Bayer et al. (2013)
Endozoicomonas montiporae; E. gorgoniicola; E. acroporae; E. euniceicola	core whole crushed		Y	Bayer et al. (2013); Ainsworth et al. (2015)
Enhydrobacter	core		N	Leite et al. (2018)
Gluconacetobacter	core		N	Hernandez-Agreda et al. (2016, 2018)
Haliea	core		Y	Bayer et al. (2013)
Halobacteriovorax	obligate periplasmic predators		N	Welsh and Vega Thurber, (2016)
Halomonas taeanensis	?		Y	Rosado et al. (2019)
Inquilinus	core		N	Bernasconi et al. (2019)
Kocuria kristinae	core		Y	Sweet and Bulling (2017)
Loktanella	core		Y	Bernasconi et al. (2019)
Marinobacter	core		Y	Morrow et al. (2012); Sharp et al. (2012)
Methylobacterium	core		N	Sweet et al. (2017)
Methylophaga	core		N	Bernasconi et al. (2019)
Mycobacterium	core		Y	Hernandez-Agreda et al. (2018)
Neisseria	core		N	Sweet et al. (2017)
Oceanospirillae	core		N	Morrow et al. (2012); Sharp et al. (2012)
Propioibacterium	core		N	Bayer et al. (2013); Ainsworth et al. (2015); Hester et al. (2016); Sweet and Bulling (2017); Sweet et al. (2017); Hernandez-Agreda et al. (2018)
Pseudoalteromonas	core		Y	Hernandez-Agreda et al. (2018); Rosado et al. (2019)
Pseudomonas	core		Y	Hester et al. (2016); Sweet and Bulling (2017); Sweet et al. (2017); Bernasconi et al. (2019)
Ralstonia	core		Y	Ainsworth et al. (2015); Bernasconi et al. (2019)
Rhodobium	core		N	Hester et al. (2016)
Rhodovulum	core		N	Bernasconi et al. (2019)
Rickettisales	core whole crushed		N	Ainsworth et al. (2015)
Roseobacter	core		Y	Morrow et al. (2012); Sharp et al. (2012)
Roseovarius	core whole crushed		Y	Ainsworth et al. (2015)
Rothia	core		Y	Sweet et al. (2017)
Ruegeria	core	Inhibit growth of pathogens such as V. coralliilyticus	Y	Hernandez-Agreda et al. (2018); Miura et al. (2019)
Simkaniaceae	core		N	Bernasconi et al. (2019)
Spirochaeta	core	Nitrogen cycling	N	Hester et al. (2016)
Staphylococcus	core		Y	Leite et al. (2018)
Streptococcus	core		Y	Sweet et al. (2017)
