# Supplementary material for: Insights into the cultured bacterial fraction of corals
Source: Research Square preprint supplement (doi:10.21203/rs.3.rs-105866/v1), 2020-11-21
Supplement: Supplementary file 4 [file b3b2b178875c74ebe15cd9b2.xlsx]

## Sheet: Table 3
Host coral (Genus and species)	Host Order	No. of unique cultured bacteria	Doinant Bacterium	Media utilised to culture bacteria	No. of OTUs identified via sequencing (if known)	% culturable microbiome	Example of studies assessing this species
Acropora cytherea	Scleractinian	19	Ruegeria, Photobacterium, Endozoicomonas, Shima,	DMSP enriched minimal media
Acropora gemmifera	Scleractinian	1	Janibacter	Marine Agar	32-124	0.8-3%	Gardner et al. 2019
Acropora hemprichii	Scleractinian	13	Shima, Labrenzia, Rhodobacteracea	DMSP enriched minimal media	177	0.07	Ziegler et al. 2016
Acropora humilis	Scleractinian	9	Sulfitobacter, Vibrio, Ruegeria	DMSP enriched minimal media
Acropora millepora	Scleractinian	90	Vibrio, Staphylococcus, Halomonas, Pseudomonas, Marinobacter, Roseovarius, Pseudoalteromonas, Tenacibaculum, Thalassobius, Alteromonas,	Minimal Basal Agar, Luria bertani	531-724	12-17%	Grottoli et al. 2018; Bourne et al. 2013: Li et al. 2013
Acropora palmata	Scleractinian	18	Photobacterium, Alteromonas	GASWA	1671	0.01	Sunagawa et al. 2010
Acropora spathulata	Scleractinian	14	Vibrio, Ruegeria, Pseudoalteromonas	Minimal Base Agar
Acropora tenuis	Scleractinian	29	Pseudoalteromonas, Alteromonas, Vibrio, Tenacibaculum	Minimal Basal Agar	183 (distinct OTUs from clones)	0.16	Littman et al. 2009
Acalycigorgia inermis	Alcyonacea - subclass: Octocorallina	7	Streptomyces, Nocardia	Custom Media
Acanthogorgia sp	Alcyonacea - subclass: Octocorallina	31	Pseudoalteromonas, Ferrimonadaceae, Alteromonadacea,	GASWA
Alcyonium antarcticum	Alcyonacea - subclass: Octocorallina	10	Pseudoalteromonas, Vibrio, Shewanella, Psychrobacter	Marine Agar, Nutrient Agar, R2A Agar	23 (distinct OTUs from clones)	0.43	Webster and Bourne 2007
Alcyonium digitatum	Alcyonacea - subclass: Octocorallina	252	Bascillus, Vibrio, Lysinibacillus, Micrococcus, Pseudoalteromonas, Pseudomonas, Shewanella,	Custom Media
Anthothella grandiflora	Scleractinian	13	Colwelliaceae, Alteromondales	GASWA	30-95	14-43%	Lawler et al. 2016
Antipathes dichotoma	Antipatharia	21	Bascillus, Micromonospora, Streptomyces, Saccharomonospora	Custom Media	766-913	2-3%	Liu et al. 2018
Antipathes sp.	Antipatharia	5	Saccharomonospora, Micromonospora	Custom Media
Astrangia poculata	Scleractinian	176	Flavobacterium, Bascillus, Micrococcus, Pseudoalteromonas, Zobellia, Roseivirga, Marivita, Pseudirhidibacter, Pseudorodobacter	DIFCO	806	0.22	Goldsmith et al. 2019
Briareum sp.	Alcyonacea - subclass: Octocorallina	12	Vibrio, Pseudovibrio, Pseudomonas, Labrenzia	M1 Agar, Gause mineral agar
Cirrhipathes sp	Antipatharia	24	Vibrio, Acinetobacter, Pseudoalteromonas, Pseudomonas	Nutrient Agar, Marine Agar
Cryogorgia koolsae	Alcyonacea - subclass: Octocorallina	6	Vibrio, Aliivibrio, Pseudoalteromonas	TCBS, GASWA	40 (clones)	0.15	Gray et al. 2011
Dendronephtheya sp.	Alcyonacea - subclass: Octocorallina	11	Ruegeria, Alteromonas, Vibrio	Nutrient Agar
Diploria strigosa	Scleractinian	30	Vibrio, Pseudomonas, Micrococcus, Stenotrophomonas	Luria Bertani and Marine Agar	1759	0.017	Sunagawa et al. 2010
Echinogorgia aurantiaca	Alcyonacea - subclass: Octocorallina	2	Micromonospora, Verrucosispora	Custom Media
Eunicea fusca	Alcyonacea - subclass: Octocorallina	1	Endozoicomonas	Marine Agar	40 (distinct OTUs from clones)	0.025	Duque-Alarcon et al. 2012
Eunicella verrucosa	Alcyonacea - subclass: Octocorallina	4	Vibrio	Marine Agar	31 (distinct OTUs from clones)	0.13	Ransome et al. 2014
Eunicella labiate	Alcyonacea - subclass: Octocorallina	43	Vibrio, Ruegeria, Aliivibrio, Sphingorhabdus, Roseovarius	Marine Agar	603	0.07	Keller-Costa et al. 2017
Favia favus	Scleractinian	15	Thalassomonas, Vibrio, Alteromonadales	Marine Agar
Fungia echinata	Scleractinian	19	Vibrio, Pseudoalteromonas, Alteromonas, Aliivibrio	Marine Agar
Fungia granulosa	Scleractinian	11	Vibrio, Planococcaceae, Corynebacterium, Alteromonadales	Marine Agar	168	0.07	Rothig et al. 2016
Fungia scutaria	Scleractinian	21	Kocuria, Alteromonas, Shewanella, Micrococcus, Ruegeria, Loktanella, Vibrio	Marine Agar
Galaxea fascicularis	Scleractinian	30	Ruegeria, Vibrio, Pseudovibrio, Microbulbifer, Aesturiibacter, Photobacterium	Marine Agar	646-1459	2-5%	Li et al. 2013
Iciligorgia schrammi	Alcyonacea - subclass: Octocorallina	33	Bacillus, Vibrio, Stenotrophomonas, Wolbachia,	Nutrient Agar, Marine Agar
Isopora palifera	Scleractinian	1	Pseudoteredinibacter isoporae	Marine Agar	181-1623	0.06-0.6%	Chen et al. 2011
Leptogorgia miniata	Alcyonacea - subclass: Octocorallina	47	Pseudomonas, Vibrio, Bascillus, Klebsiella, Acinetobacter	Nutrient Agar, Marine Agar
Lobophytum sp.	Alcyonacea - subclass: Octocorallina	3	Marinobacetrium, Pseudoalteromonas	Actinomycete-selective media
Lophelia pertusa	Scleractinian	446	Moritella, Vibrio, Pseudomonas, Photobacterium, Aliivibrio, Curtobacterium, Pseudoalteromonas, Micrococcaceae, Cobetia, Shewanella, Psychrobacter,	Salty R2, Orange Serum Agar	94-712	<63%	Kellogg et al. 2017
Melitodes squamata	Alcyonacea - subclass: Octocorallina	13	Streptomyces, Sphinomonas, Saccharomonospora	Custom Media
Menella praelonga	Alcyonacea - subclass: Octocorallina	1	Nocardiopsis coralliicola	Trehalose-proline isolation medium
Millepora alcicornis	Scleractinian	24	Micrococcus, Bacillus, Raoultella, Arthrobacter, Staphylococcus	Marine Agar, Luria Bertani
Montastraea cavernosa (mucus)	Scleractinian	12	Euzebyella, Oceanicola, Pseudovibrio, Ruegeria, Halomonas, Marinomonas	CSA+pen	64 (distinct OTUs from clones)	0.19	Frias-Lopez et al. 2002
Montipora aequituberculata	Scleractinian	9	Vibrio, Endozoicomonas montiporae, Pseudomonas	Marine Agar, TCBS
Montipora capitata	Scleractinian	24	Ruegeria, Psychrobacter, Pseudoalteromonas, Micrococcus, Bacillus,	GASWA, Marine Agar, R2A	1172-1697	1.4-2%	Shore-Maggio et al. 2015
Montipora spumosa	Scleractinian	11	Vibrio, Thalassotalea, Alteromonas	Minimal Base Agar
Mussismilia braziliensis	Scleractinian	15	Staphylococcus, Exiguobacterium, Bacillus, Halomonas	Luria Bertani	218-6733	0.2-7%	Fernando et al. 2014
Mussismilia hispida	Scleractinian	256	Vibrio, Marinomonas, Pseudoalteromonas, Marinomonas, Brachybacterium, Bacillus, Photobacterium,	Thiosulfate-citrate-bile salt-sucrose agar, Luria Bertani, Nitrogen-free (Nfb) selective medium	1286	0.2	Carlos et al. 2013
Oculina patagonica	Scleractinian	237	Vibrio, Ruegeria, Bacillus, Pseudoalteromonas, Aquimarina, Photobacterium, Pseudovibrio, Microbulbifer, Shewanella, Ferrimonas,	Marine Agar	1031-1779	13-23%	Rubia-Portillo et al. 2016
Orbicella (Montastrea) annularis (mucus)	Scleractinian	69	Rhodobacteraecea, Vibrio, Alteromonas, Pseudoalteromonas, Photobacterium, Shewanella,	CSA, Marine Agar	281	0.25	Kellogg et al. 2013
Orbicella faveolata	Scleractinian	5	Vibrio	Marine Agar	128-187 (distinct OTUs from clones)	2.7-4%	Kimes et al. 2013
Pachyseris speciose	Scleractinian	12	Vibrio	Marine Agar, TCBS	628	0.002	Hernandez-Agreda et al. 2018
Palythoa caribaeorum	Zoantharia	65	Bacillus, Acinetobacter, Micrococcus, Brevibacterium, Pseudoalteromonas, Alteromonas, Vibrio, Photobacterium, Nesterenkoni, Shewanella,	Nitrogen-free (Nfb) selective medium, blood agar	459	0.14	Paulino et al. 2017
Paragorgia arborea	Alcyonacea - subclass: Octocorallina	37	Pseudoalteromonas, Allivibrio, Colwellia, Shewanella, Photobacterium, Vibrio, Nesterenkonia, Moritella	GASWA, Marine Agar, TCBS	46-121	30-80%	Weiler et al. 2019
Platygyra carnosus	Scleractinian	172	Vibrio, Shewanella, Ruegeria, Photobacterium, Microbulbifer, Pseudovibrio, Pseudoalteromonas, Labrenzia, Alteromonas,	Custom media: ASW + agar, peptone, yeast extract	785-1023	17-22%	Ng et al. 2015
Plexaura sp.	Alcyonacea - subclass: Octocorallina	7	Pseudoalteromonadaceae, Vibrio, Endozoicomonas gorgoniicola	Marine Agar
Plumarella superba	Alcyonacea - subclass: Octocorallina	21	Aliivibrio, Shewanella, Photobacterium, Sulfitobacter	GASWA	36-97	22-58%	Kellogg et al. 2016
Pocillopora acuta	Scleractinian	21	Vibrio, Ruegeria, Aquimarina, Pseudovibrio, Sphingomonas, Muricauda	Minimal Base Agar
Pocilopora damicornis	Scleractinian	16	Pseudoalteromonas, Vibrio, Pseudovibrio,	R2A, Marine Agar, Minimal Base Agar	411-531	3-4%	Bourne et al. 2013
Porites andrewsi	Scleractinian	2	Vibrio	TCBS	910	0.002	Zhang et al. 2015
Porites astreoides	Scleractinian	15	Halomonas, Exiguobacterium, Vibrio, Pseudomonas, Bacillus	Luria Bertani	1340	0.01	Sunagawa et al. 2010
Porites compressa	Scleractinian	33	Labrenzia, Ruegeria, Photobacterium, Vibrio, Tenacibaculum,	MA2218, R2A
Porites lutea	Scleractinian	115	Vibrio, Photobacterium, Pseudoalteromonas, Ruegeria, Amphiritea, Micrococcus, Marinomonas, Neptunomonas, Idiomarina, Tenacibaculum,	Marine Broth, Marine Agar, TCBS	78-2463	5-36%	Gardner et al. (2019); Li et al. 2013
Primnoa resdaeformis	Alcyonacea - subclass: Octocorallina	25	Vibrio, Colwellia, Pseudoalteromonas, Rhodobacteraceae, Psychrobium	GASWA
Pseudodiploria strigose (mucus)	Scleractinian	5	Kocuria, Micrococcus, Halobacillus,	GASWA
Pseudopterogorgia americana	Alcyonacea - subclass: Octocorallina	29	Erythrobacter, Vibrio, Bacillus, Pseudoalteromonas	GASWA
Rhytisma fulvum	Alcyonacea - subclass: Octocorallina	2	Moraxellaceae	Marine Agar
Sarcophyton glaucum	Alcyonacea - subclass: Octocorallina	20	Bascillus, Pseudomonas, Streptomyces	Starch casein, Nutrient Agar, International Streptomyces project medium,
Sarcophyton sp.	Alcyonacea - subclass: Octocorallina	3	Pseudovibrio	Marine Agar, Yeast Extract Agar, Trehalose Proline Agar, Raffinose Histidine Agar,	67-93	3-4.5%	Bourne et al. 2013
Scleronephthya sp.	Alcyonacea - subclass: Octocorallina	31	Micromonospora, Streptomyces, Nocardioides, Mycobacterium, Gordonia,	Custom Media
Siderastrea siderea	Scleractinian	30	Vibrio, Pseudomonas, Micrococcus, Stenotrophomonas	Luria Bertani and Marine Agar	155 (ARISA)	0.19	Pratte et al. 2015
Siderastrea stellata	Scleractinian	4	Vibrio, Cobetia, Shewanella	Marine Agar	354 (distinct OTUs from clones)	0.012	Lins-de-Barros et al. 2010
Stylophora pistillata	Scleractinian	21	Vibrio, Bacillus, Alteromonas, Erythrobacter, Gordonia, Kangiella, Pseudovibrio	Marine Agar, Minimal Base Agar	139-418	5-15%	Bayer et al. 2013
Subergorgia suberosa	Alcyonacea - subclass: Octocorallina	13	Nocardia, Sphingomonas, Streptomyces, Micromonospora	Custom Media
Subergorgia reticulata	Alcyonacea - subclass: Octocorallina	4	Nocardia, Sphingomonas, Streptomyces, Micromonospora	Custom Media
Swiftia exertia	Alcyonacea - subclass: Octocorallina	19	Acintobacter, Arthrobacter, Stenotrophomonas, Bacillus,	Nutirent Agar, Marine Agar
Thouarella superba	Alcyonacea - subclass: Octocorallina	21	Photobacterium, Shewanella, Microbacterium, Photobacterium, Aliivibrio	TCBS
Tubastraea coccinea	Scleractinian	8	Dietzia, Streptomyces, Brevibacterium	Glycerol Arginine Agar, Asparagine Peptone Agar, and R2A	1173-2845	0.28-0.68%	Carlos et al. 2013
Xenia sp. (mucus)	Alcyonacea - subclass: Octocorallina	2	Xanthomonadaceae, Micrococcaceae	Marine Agar
Zoanthus pulchellus	Zoantharia	6	Vibrio, Stenotrophomonas, Pseudoalteromonas	Blood Agar
Zoanthus solanderi	Zoantharia	7	Vibrio	Nitrogen-free (Nfb) selective medium
	TOTAL:	2909
