# Supplementary material for: Insights into the cultured bacterial fraction of corals
Source: Research Square preprint supplement (doi:10.21203/rs.3.rs-105866/v1), 2020-11-21
Supplement: Supplementary file 5 [file a5b37465070b498d37bc2e86.xlsx]

## Sheet: Sheet1
Supplementary Table. Basic information of 74 coral bacterial isolates with their genomes sequences available in public databases (NCBI; IMG/DOE-JGI).
Nº	Isolate name	Bacterial family (class)	Host scientific name (coral type)	Genome Size bp	% GC-Content1	Number of CDSs1	Project Accession	Sample Accession	Assembly Accession	Orginial Genome Report
1	Janibacter corallicola NBRC 107790	Intrasporangiaceae (Actinobacteria)	Acropora gemmifera (hexacoral)	3108578	71.4	3062	PRJDB231	SAMD00046480	GCA_001570965.1	Direct submission (National Institute of Technology and Evaluation)
2	Dietzia sp. WMMA184	Dietziaceae (Actinobacteria)	Montastraea faveolata (hexacoral)	4162045	69.9	4015	PRJNA400578	SAMN07571474	GCA_002441635.1	Braun et al., 2018 MRA
3	Cytophaga sp. FL35	Cytophagaceae (Cytophagia)	Montastraea cavernosa mucus (hexacoral)	4838163	39.7	4322	PRJNA343499	SAMN05805725	JACSOH000000000	This study
4	Stappia indica EBBD 17.2	Rhodobacteraceae (Alphaproteobacteria)	black-band-diseased hexacoral	4826226	67	4507	PRJNA328867	SAMN05382895	GCA_001696545.1	Henao et al., 2017 Genomics Data
5	Stappia indica SBBC49	Rhodobacteraceae (Alphaproteobacteria)	black-band-diseased hexacoral	5009039	67	4761	PRJNA328866	SAMN05382876	GCA_001696535.1	Henao et al., 2017 Genomics Data
6	Pseudovibrio sp. FO-BEG1*	Rhodobacteraceae (Alphaproteobacteria)	undefined hexacoral	5916782	52.4	5579	PRJNA73563	SAMN02261085	GCA_000236645.1	Bondarev et al., 2012 EnvMicrobiol
7	Paracoccus isoporae DSM 22220	Rhodobacteraceae (Alphaproteobacteria)	Isopora polifera (hexacoral)	3523473	65.8	3450	PRJNA329835	SAMN05421538	GCA_900101865.1	direct (DOE - JGI)
8	Paracoccus sp. R12_1	Rhodobacteraceae (Alphaproteobacteria)	Acropora cytherea (hexacoral)	4066022	63.9	4048	Gs0145871	Gp0505227	2893719711	This study
9	Paracoccus sp. R12_2	Rhodobacteraceae (Alphaproteobacteria)	Acropora hemprichii (hexacoral)	4068158	63.9	4050	Gs0145871	Gp0505228	2893715632	This study
10	Shimia sp. R9_1	Rhodobacteraceae (Alphaproteobacteria)	Acropora hemprichii (hexacoral)	4432319	58.3	4301	Gs0145871	Gp0505241	2889144759	This study
11	Shimia sp. R9_2	Rhodobacteraceae (Alphaproteobacteria)	Acropora cytherea (hexacoral)	4473125	58.2	4367	Gs0145871	Gp0505242	2889140383	This study
12	Shimia sp. R9_3	Rhodobacteraceae (Alphaproteobacteria)	Acropora humilis (hexacoral)	4642026	58.2	4502	Gs0145871	Gp0505243	2889135909	This study
13	Shimia sp. R10_1	Rhodobacteraceae (Alphaproteobacteria)	Acropora cytherea (hexacoral)	4,365,256	57.1	4266	Gs0145871	Gp0505225	2893727905	This study
14	Shimia sp. R11_0	Rhodobacteraceae (Alphaproteobacteria)	Acropora hemprichii (hexacoral)	4150998	57.2	4117	Gs0145871	Gp0505226	2893723808	This study
15	Ruegeria sp. R8_1	Rhodobacteraceae (Alphaproteobacteria)	Acropora humilis (hexacoral)	4187537	57.7	4141	Gs0145871	Gp0505239	2889153205	This study
16	Ruegeria sp. R8_2	Rhodobacteraceae (Alphaproteobacteria)	Acropora cytherea (hexacoral)	4182316	57.7	4137	Gs0145871	Gp0505240	2889149038	This study
17	Ruegeria sp. R13_0	Rhodobacteraceae (Alphaproteobacteria)	Acropora cytherea (hexacoral)	4683202	58.4	4723	Gs0145871	Gp0505229	2893710938	This study
18	Ruegeria sp. R14_0	Rhodobacteraceae (Alphaproteobacteria)	Acropora cytherea (hexacoral)	4659537	58.3	4664	Gs0145871	Gp0505230	2893706316	This study
19	Sulfitobacter sp. R18_1	Rhodobacteraceae (Alphaproteobacteria)	Acropora humilis (hexacoral)	4724887	59.9	4968	Gs0145871	Gp0505234	2889178456	This study
20	Sulfitobacter sp. R18_2	Rhodobacteraceae (Alphaproteobacteria)	Acropora humilis (hexacoral)	3547228	62.7	3552	Gs0145871	Gp0505235	2889174819	This study
21	Tropicibacter sp. R15_0	Rhodobacteraceae (Alphaproteobacteria)	Acropora hemprichii (hexacoral)	5038077	58.2	5130	Gs0145871	Gp0505231	2893701126	This study
22	Tropicibacter sp. R16_0	Rhodobacteraceae (Alphaproteobacteria)	Acropora cytherea (hexacoral)	5236250	59.4	5144	Gs0145871	Gp0505232	2889187427	This study
23	Nautella sp. R17_0	Rhodobacteraceae (Alphaproteobacteria)	Acropora humilis (hexacoral)	4023027	59.9	3955	Gs0145871	Gp0505233	2889183490	This study
24	Labrenzia sp. R4_1	Rhodobacteraceae (Alphaproteobacteria)	Acropora hemprichii (hexacoral)	5236174	56.5	5,158	Gs0145871	Gp0505236	2889169733	This study
25	Labrenzia sp. R4_2	Rhodobacteraceae (Alphaproteobacteria)	Acropora cytherea (hexacoral)	5659244	56.5	5654	Gs0145871	Gp0505237	2889164208	This study
26	Labrenzia sp. R5_0	Rhodobacteraceae (Alphaproteobacteria)	Acropora cytherea (hexacoral)	6775301	59	6509	Gs0145871	Gp0505238	2889157821	This study
27	Nitratireductor aquibiodomus EBB 35.1	Phyllobacteriaceae (Alphaproteobacteria)	black-band-diseased hexacoral	4490156	61.5	4435	PRJNA327597	SAMN05348542	GCA_001696575.1	Henao et al., 2017 Genomics Data
28	Thalassospira sp. A3_1	Rhodosprilillacaeae (Alphaproteobateria)	Acropora cytherea (hexacoral)	4490931	55	4354	Gs0145871	Gp0490247	2893749381	This study
29	Erythrobacter sp. A6_0	Erythrobacteraceae (Alphaproteobacteria)	Acropora humilis (hexacoral)	2,711,056	63.8	2669	Gs0145871	Gp0490254	2893756434	This study
30	Erythrobacter sp. A7_0	Erythrobacteraceae (Alphaproteobacteria)	Acropora cytherea (hexacoral)	2951563	63.7	2884	Gs0145871	Gp0490248	2893753741	This study
31	Brevundimonas sp. A19_0	Caulobacteraceae (Alphaproteobacteria)	Acropora cytherea (hexacoral)	2921859	67.6	2947	Gs0145871	Gp0490155	2878020043	This study
32	Endozoicomonas acroporae Acr-14	Endozoicomonadaceae (Gammaproteobacteria)	Acropora spp. (hexacoral)	6048850	49.2	6054	PRJNA422318	SAMN08174373	GCA_002864045.1	Tandon et al., 2018 MRA
33	Endozoicomonas montiporae CL-33	Endozoicomonadaceae (Gammaproteobacteria)	Montipora aequituberculata (hexacoral)	5430256	48.5	5470	PRJNA66389	SAMN04155633	GCA_001583435.1	Ding et al., 2016 Front Microbiol
34	Endozoicomonas sp. G2_1	Endozoicomonadaceae (Gammaproteobacteria)	Acropora cytherea (hexacoral)	6795618	49	6886	Gs0145871	Gp0505223	2893738104	This study
35	Endozoicomonas sp. G2_2	Endozoicomonadaceae (Gammaproteobacteria)	Acropora hemprichii (hexacoral)	6302811	49.1	5926	Gs0145871	Gp0505224	2893732107	This study
36	Marinomonas fungiae AN44 (JCM 18476)	Oceanosprilliaceae (Gammaproteobacteria)	Fungia echinata (hexacoral)	4189249	46.2	3945	PRJNA289015	SAMN03840741	GCA_001418205.1	Kumari et al., 2018 MRA
37	Cobetia marina BMC 6	Halomonadaceae (Gammaproteobacteria)	Pocillopora damicornis (hexacoral)	3980130	62.4	3389	PRJNA638634	SAMN15198645	GCA_013350055.1	This study; BMCs from Rosado et al., 2019 ISMEJ
38	Halomonas taeanensis BMC 7	Halomonadaceae (Gammaproteobacteria)	Pocillopora damicornis (hexacoral)	3836947	61.9	3511	PRJNA638634	SAMN15198646	GCA_013349955.1	This study; BMCs from Rosado et al., 2019 ISMEJ
39	Halomonas meridiana R1t3	Halomonadaceae (Gammaproteobacteria)	Acropora palmata mucus (hexacoral)	3471965	56.7	3419	PRJNA269585	SAMN03255752	GCA_000943375.1	Meyer et al., 2015 Standards in Genomics Sciences
40	Luteimonas sp. JM171	Xanthomonadaceae (Gammaproteobacteria)	Porites lobata (hexacoral)	2992353	69.1	2808	PRJNA340268	SAMN05711034	GCA_001717465.1	Wan et al., 2016 MRA
41	Pseudoalteromonas luteoviolacea HI1**	Pseudoaltermonadaceae (Gammaproteobacteria)	Pocillopora damicornis (hexacoral)	6070357	42.2	5507	PRJNA257109	SAMN02947394	GCA_000814765.1	Asahina and Hadfield 2015 MRA
42	Pseudoalteromonas sp. BMC 1	Pseudoaltermonadaceae (Gammaproteobacteria)	Pocillopora damicornis (hexacoral)	4213823	41.1	3818	PRJNA638634	SAMN15198644	GCF_013350085.1	This study; BMCs from Rosado et al., 2019 ISMEJ
43	Pseudoalteromonas sp. BMC 2	Pseudoaltermonadaceae (Gammaproteobacteria)	Pocillopora damicornis (hexacoral)	4710473	41.2	4228	PRJNA638634	SAMN15198640	GCA_013349945.1	This study; BMCs from Rosado et al., 2019 ISMEJ
44	Pseudoalteromonas sp. BMC 3	Pseudoaltermonadaceae (Gammaproteobacteria)	Pocillopora damicornis (hexacoral)	4787926	41.1	4248	PRJNA638634	SAMN15198643	GCA_013349995.1	This study; BMCs from Rosado et al., 2019 ISMEJ
45	Pseudoalteromonas sp. BMC 4	Pseudoaltermonadaceae (Gammaproteobacteria)	Pocillopora damicornis (hexacoral)	4928419	41.2	4521	PRJNA638635	SAMN15198641	GCA_013350045.1	This study; BMCs from Rosado et al., 2019 ISMEJ
46	Pseudoalteromonas sp. BMC 5	Pseudoaltermonadaceae (Gammaproteobacteria)	Pocillopora damicornis (hexacoral)	4707478	41.2	4230	PRJNA638636	SAMN15198642	GCA_013349985.1	This study; BMCs from Rosado et al., 2019 ISMEJ
47	Pseudoalteromonas sp. BZK2	Pseudoaltermonadaceae (Gammaproteobacteria)	Orbicella annularis mucus (hexacoral)	4,802,731	40.9	4371	PRJNA343499	SAMN05805727	JACSOG000000000	This study
48	Alteromonas sp. BZK5	Alteromonadaceae (Gammaproteobacteria)	Orbicella annularis mucus (hexacoral)	4903800	44.5	4660	PRJNA343499	SAMN05805728	JASCOE000000000	This study
49	Thallassotalea euphylliae H1	Colwelliaceae (Gammaproteobacteria)	Montipora sp. (hexacoral)	4773423	44.3	4388	PRJNA484286	SAMN09762563	GCA_003390335.1	direct (Nanyang Technological University)
50	Thallassotalea sp. G20_0	Colwelliaceae (Gammaproteobacteria)	Acropora hemprichii (hexacoral)	4120319	42.5	3922	Gs0145871	Gp0490255	2893759370	This study
51	Salinisphaera sp. G21_0	Salinisphaeraceae (Gammaproteobacteria)	Acropora cytherea (hexacoral)	3734309	64.2	3640	Gs0145871	Gp0505222	2893745777	This study
52	Photobacterium sp. BZF1	Vibrionaceae (Gammaproteobacteria)	Orbicella annularis mucus (hexacoral)	6588237	47.6	6290	PRJNA343499	SAMN05805726	JACSOF000000000	This study
53	Vibrio fortis S7-72	Vibrionaceae (Gammaproteobacteria)	Fungia sp. (hexacoral)	5531351	44.9	5013	PRJNA565475	SAMN12748540	GCA_008756975.1	Deb et al., 2020 MRA
54	Vibrio fortis AN60	Vibrionaceae (Gammaproteobacteria)	Fungia sp. (hexacoral)	5439955	45.1	5072	PRJNA565152	SAMN12736039	GCA_008756925.1	Deb et al., 2020 MRA
55	Vibrio harveyi 1DA3***	Vibrionaceae (Gammaproteobacteria)	Phyllogorgia dilatata (hexacoral)	5930024	45.6	5458	PRJNA40361	SAMN02470250	GCA_000182685.1	Thompson et al., 2009 BMC EvolBiol
56	Vibrio alginolyticus 40B***	Vibrionaceae (Gammaproteobacteria)	Mussismilia hispida (hexaoral)	5144683	44.6	5005	PRJNA40359	SAMN02470249	GCA_000176055.1	Thompson et al., 2009 BMC EvolBiol
57	Vibrio shilonii AK1***	Vibrionaceae (Gammaproteobacteria)	Oculina patagonica (hexacoral)	5701826	44	5293	PRJNA19397	SAMN02436099	GCA_000181535.1	Thompsen, et al., 2009 BMC EvolBiol; Strauss et al., 2017 mBio
58	Vibrio coralliilyticus ATCC BAA-450***	Vibrionaceae (Gammaproteobacteria)	Pocillopora damicornis (hexacoral)	5680628	45.7	5259	PRJNA40491	SAMN02393819	GCA_000176135.1	Kimes et al., 2012 ISMEJ
59	Vibrio coralliilyticus OCN008***	Vibrionaceae (Gammaproteobacteria)	Montipora capitata (hexacoral)	5534904	45.7	5712	PRJNA214563	SAMN02304133	GCA_000461895.1	Ushijima et al., 2013 MRA
60	Aquimarina megaterium EL33	Flavobacteriaceae (Flavobacteriia)	Eunicella labiata (octocoral)	6270711	32.9	5530	PRJEB14417	SAMEA4034450	GCA_900089995.1	Keller-Costa et al., 2016 MRA
61	Ruegeria sp. EL01	Rhodobacteraceae (Alphaproteobacteria)	Eunicella labiata (octocoral)	5320417	56.2	5658	PRJEB25531	SAMEA104692609	GCA_900313035.1	Raimundo et al., 2018 Mar Drugs
62	Roseovarius sp. EL26	Rhodobacteraceae (Alphaproteobacteria)	Eunicella labiata (octocoral)	3907904	53.3	4044	PRJEB25531	SAMEA1059311	GCA_900327775.1	Raimundo et al., 2018 Mar Drugs
63	Pseudophaeobacter sp. EL27	Rhodobacteraceae (Alphaproteobacteria)	Eunicella labiata (octocoral)	4551713	57.8	4503	PRJEB25531	SAMEA104692610	GCA_900313025.1	Raimundo et al., 2018 Mar Drugs
64	Sulfitobacter sp. EL44	Rhodobacteraceae (Alphaproteobacteria)	Eunicella labiata (octocoral)	4203569	58.1	4216	PRJEB25531	SAMEA104692611	GCA_900313045.1	Raimundo et al., 2018 Mar Drugs
65	Rhodobacteraceae bacterium EL53	Rhodobacteraceae (Alphaproteobacteria)	Eunicella labiata (octocoral)	4857958	54.9	4920	PRJEB25531	SAMEA104692612	GCA_900313015.1	Raimundo et al., 2018 Mar Drugs
66	Rhodobacteraceae bacterium EL129	Rhodobacteraceae (Alphaproteobacteria)	Eunicella labiata (octocoral)	3937835	57.3	3978	PRJEB25531	SAMEA104692613	GCA_900313005.1	Raimundo et al., 2018 Mar Drugs
67	Labrenzia alba EL143	Rhodobacteraceae (Alphaproteobacteria)	Eunicella labiata (octocoral)	7279421	56.3	7593	PRJEB24678	SAMEA104555632	GCA_900258415.1	Rodrigues et al., 2018 MRA
68	Sphingorhabdus sp. EL138	Sphingomonadaceae (Alphaproteobacteria)	Eunicella labiata (octocoral)	3662861	53.1	3722	PRJEB24502	SAMEA104500216	GCA_900258045.1	Silva et al., 2018 MRA
69	Kiloniella sp. EL199	Kiloniellaceae (Alphaproteobacteria)	Eunicella labiata (octocoral)	4177471	45.1	4159	PRJEB25501	SAMEA104692614	GCA_900313065.1	Raimundo et al., 2018 Mar Drugs
70	Aliivibrio sp. EL58	Vibrionaceae (Gammaproteobacteria)	Eunicella labiata (octocoral)	4297465	39	3886	PRJEB25451	SAMEA104674031	GCA_900312675.1	Raimundo et al., 2018 Mar Drugs
71	Vibrio crassostreae Evh12	Vibrionaceae (Gammaproteobacteria)	Eunicella verrucosa (octocoral)	5472963	44.5	4847	PRJEB10717	SAMEA3532819	GCA_001486525.1	Franco et al., 2016 MRA
72	Vibrio sp. Evh13	Vibrionaceae (Gammaproteobacteria)	Eunicella verrucosa (octocoral)	4891598	43.9	4347	PRJEB26006	SAMEA4610035	GCA_900382745.1	Raimundo et al., 2018 Mar Drugs
73	Vibrio sp. Evd3	Vibrionaceae (Gammaproteobacteria)	Eunicella verrucosa (octocoral)	5383149	44.5	4786	PRJEB26006	SAMEA4591840	GCA_900379685.1	Raimundo et al., 2018 Mar Drugs
74	Vibrio sp. Evd11	Vibrionaceae (Gammaproteobacteria)	Eunicella verrucosa (octocoral)	5188650	44	4787	PRJEB26006	SAMEA4610036	GCA_900382755.1	Raimundo et al., 2018 Mar Drugs
			Mean	4.77434e+06	52.9971	4551.12
			Median	4710473	54.95	4379.5
1GC-content and number of coding sequences (CDSs) were obtained using the RAST online annotation platform (Classic RAST, Glimmer 3).
*Pseudovibrio sp. FO-BEG1 is a required symbiont of an autotrophic, sulfur-oxidizing Beggiatoa strain originally isolated from a coral.
**Pseudoalteromonas luteoviolacea HI1 induces larvae settlement and metamorphosis in Pocillopora damicornis, however the strain has been originally isolated from a seawater biofilm.
***These Vibrio strains are pathogens of hard corals.
